# Supplementary material for: Genome Assembly Improvement and Mapping Convergently Evolved Skeletal Traits in Sticklebacks with Genotyping-by-Sequencing
Source: Oxford University Press journal article supplement (doi:10.1534/g3.115.017905), 2015-06-05
Supplement: 017905_017905si.pdf [file 017905_017905si.pdf]

**Genome assembly improvement and mapping convergently evolved skeletal traits in sticklebacks with Genotyping-by-Sequencing**

Andrew M. Glazer, Emily E. Killingbeck, Therese Mitros, Daniel S. Rokhsar, and Craig T. Miller<sup>1</sup>

Molecular and Cell Biology Department, University of California-Berkeley,  
Berkeley, CA 94720, USA

<sup>1</sup>Corresponding author: Craig T. Miller. Molecular and Cell Biology Department, University of California-Berkeley, Berkeley, CA 94720, USA. Phone: (510)-642-7840. Email: [ctmiller@berkeley.edu](mailto:ctmiller@berkeley.edu).

DOI: [10.1534/g3.115.017905](https://doi.org/10.1534/g3.115.017905)

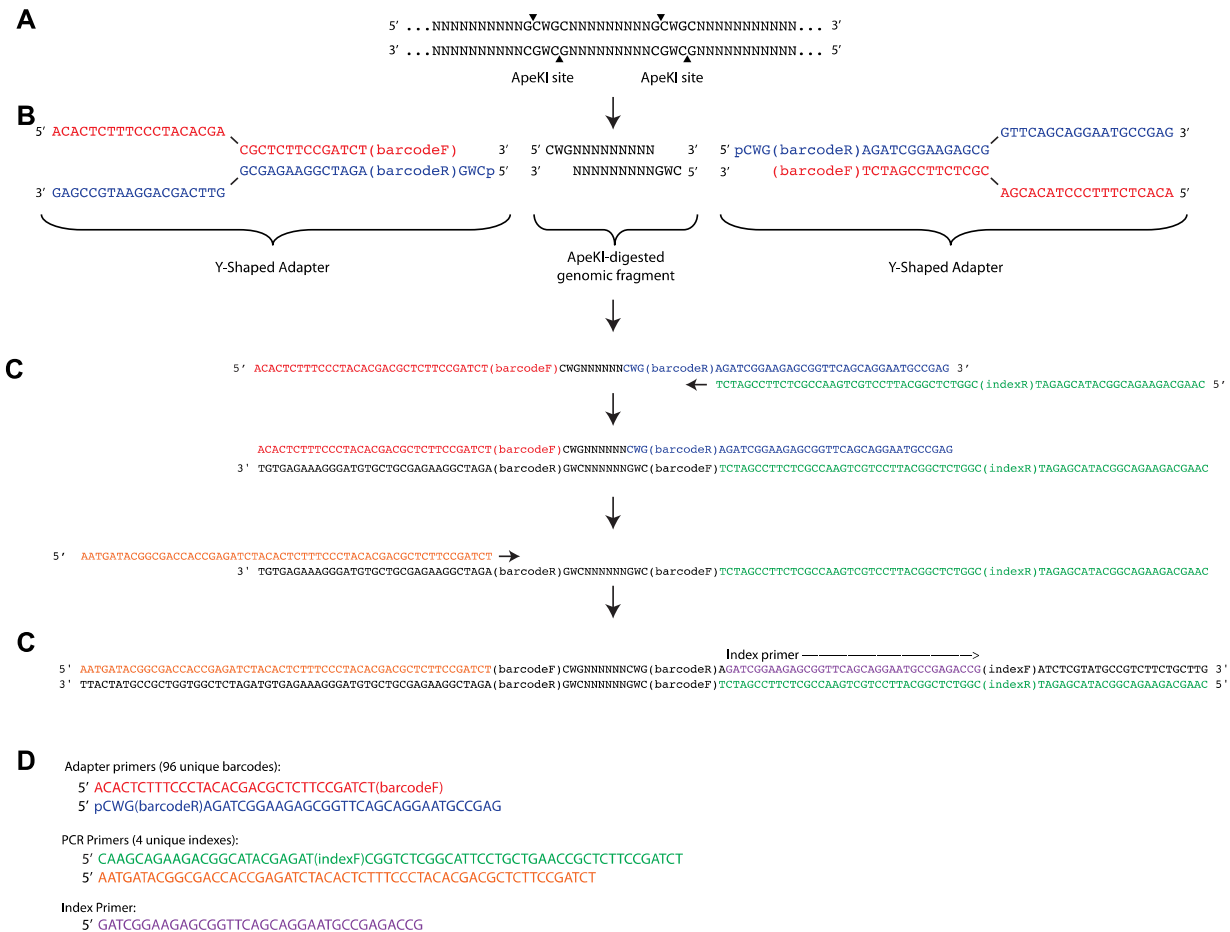

**Figure S1 Diagram of library making method.**

(A) Genomic DNA was digested with ApeKI, creating CWG overhangs. (B) Pairs of adapter primers were annealed together to create a “Y-shaped” primer, with partial base-pairing at one end. These adapters were ligated to both sides of the digested genomic DNA. 96 unique adapters were used, containing different internal barcode sequences (“barcodeF” and “barcodeR” together constitute the double-stranded barcode). (C) PCR primers with one of four index barcodes (“index”) are used to add sequence that will anneal to the Illumina flowcell. A custom index primer is used during sequencing to determine the index of each fragment, and the first bases of the R1 and R2 reads will contain the barcode. (D) Primers used in this study. See Table S1 for primer sequences.

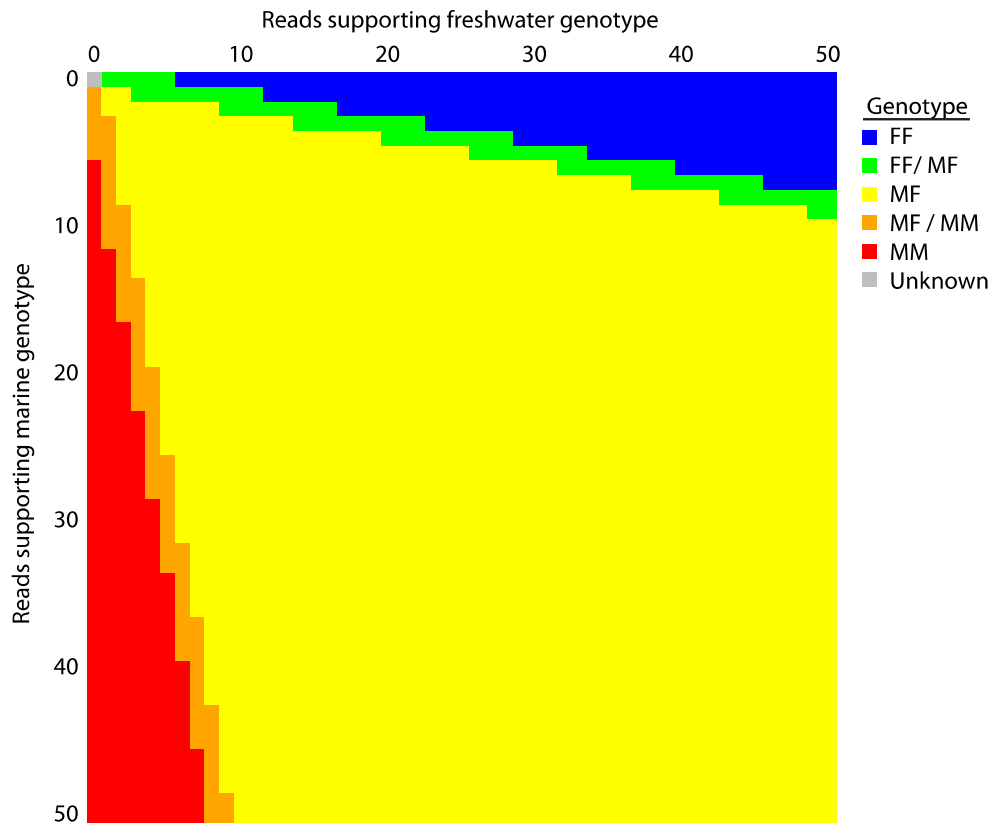

**Figure S2 Genotype calling from marine and freshwater read counts**

Reads were assumed to be independent and have a 1% error rate. M=marine allele, F=freshwater allele. The FF/MF and MF/MM genotypes indicate that there is a >95% probability that the genotype is not the third possible genotype, but that there is not a >95% certainty for any single genotype call. These genotypes were frequently called for bins that spanned recombination breakpoints.

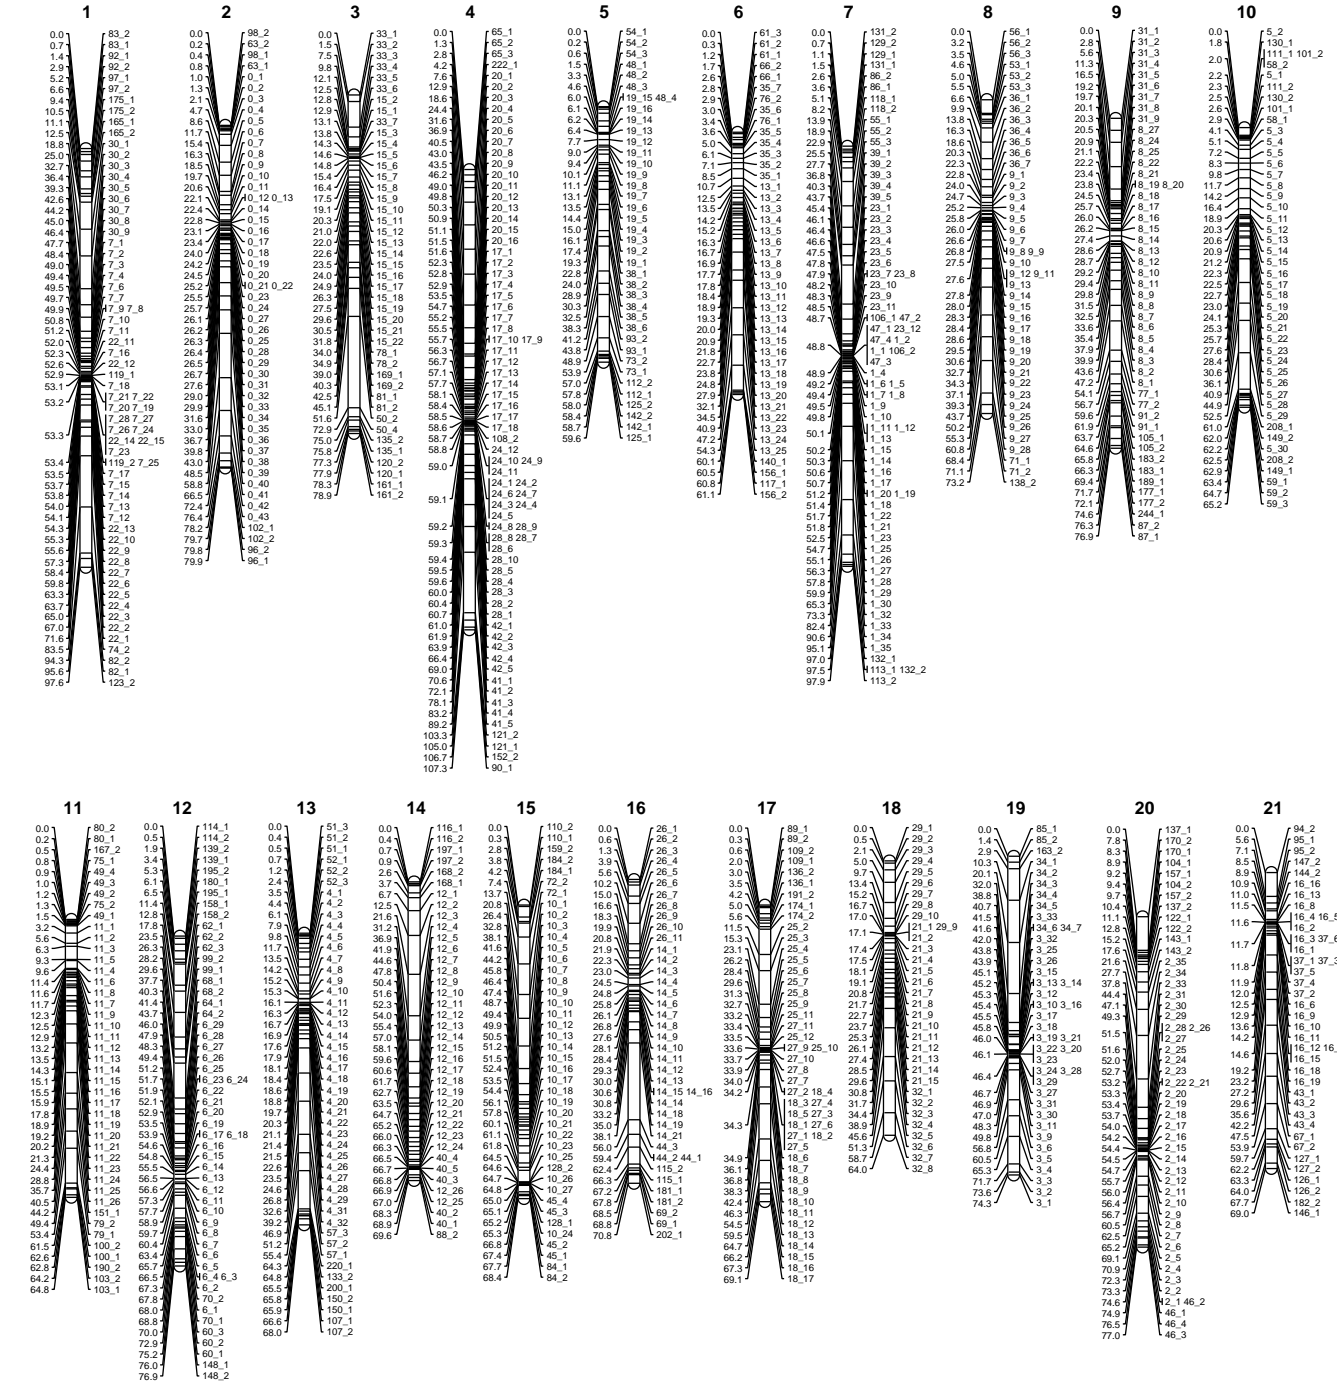

**Figure S3** Linkage map from FTC x LITC cross

Diagram of linkage map generated from the FTC x LITC cross. For each chromosome, genetic position of each marker is shown on the left in centimorgans, and marker name is shown on the right.

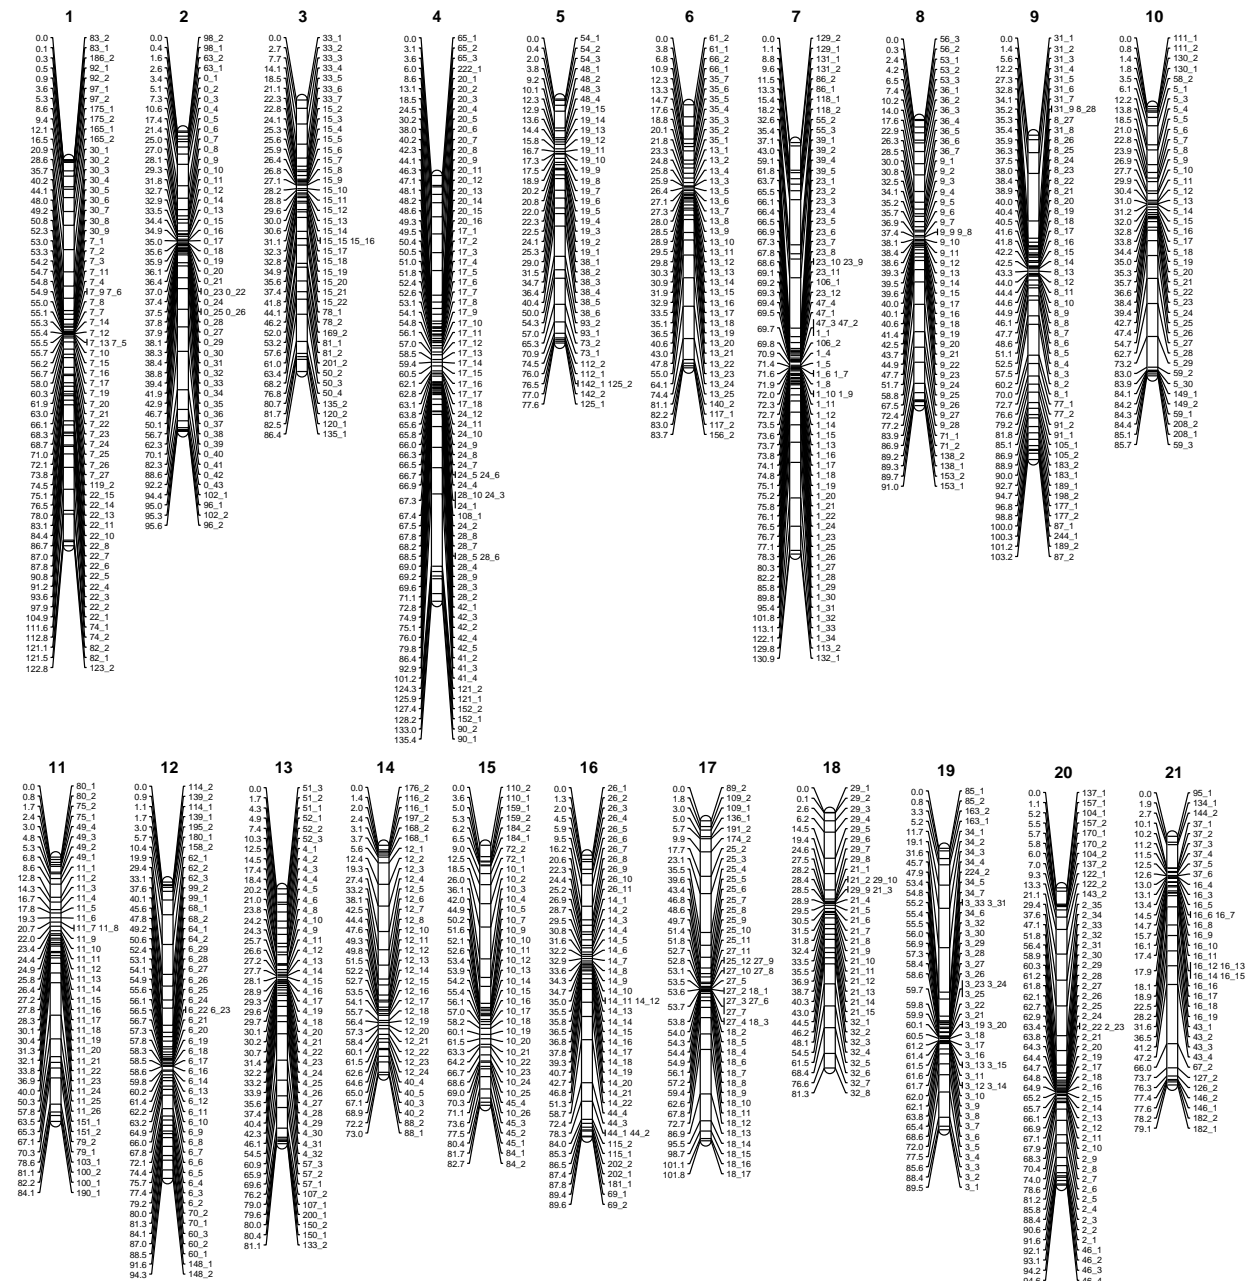

**Figure S4 Linkage map from BEPA x LITC cross**

Diagram of linkage map generated from the BEPA x LITC cross. For each chromosome, genetic position of each marker is shown on the left in centiMorgans, and marker name is shown on the right.

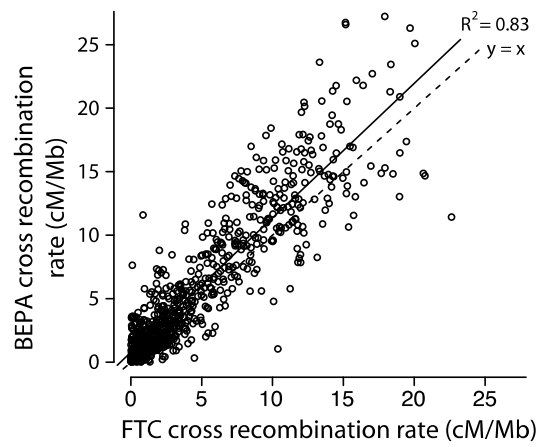

**Figure S5 High correlation of recombination rates**

Recombination rate in the FTC cross plotted against recombination rate in the BEPA cross. Each point is a marker. Recombination rates were calculated by taking the local slope of the loess-smoothed genetic vs. physical plots shown in Figure 3. Recombination rates are highly correlated ( $R^2 = 0.83$ ). Solid line: best fit line from a linear regression; dotted line:  $y=x$ . Total genetic map size was smaller in the FTC cross (1569.9 cM) compared to the BEPA cross (1963.3 cM). Most points were displaced from the  $y=x$  line, indicating a higher recombination rate throughout the genome in the BEPA cross.

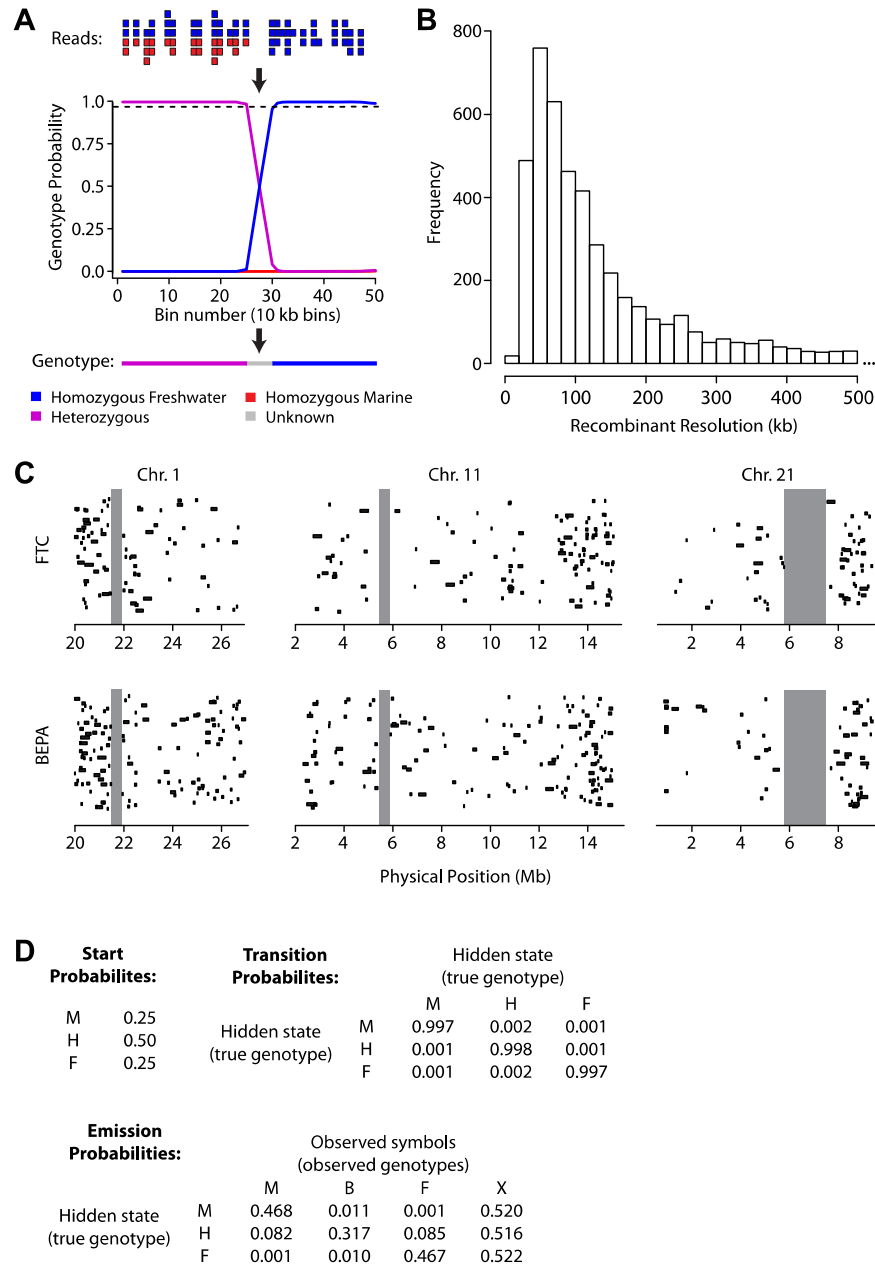

**Figure S6 Fine-mapping recombinant breakpoints with a Hidden Markov Model**

(A) Reads were binned into small 10 kilobase (kb) bins. For each bin, the probability of each genotype was determined, and boundaries of the recombination breakpoint were set at the 99% cutoff. (B) Histogram of recombination breakpoint resolution in the FTC x LITC cross. Median resolution was 89 kb. 539 additional recombinants (not shown) had a resolution of greater than 500 kb. (C) Diagram of high-resolution (<350 kb) recombination breakpoints near three marine/freshwater inversions. Each line represents the 99% confidence interval for a recombination breakpoint in a single fish and the grey rectangles represent the previously published marine/freshwater inversion boundaries (Jones et al. 2012). Data is presented for the entire scaffold containing each inversion (scaffold 22 on chromosome 1, scaffold 11 on chromosome 11, and scaffold 16 on chromosome 21). Physical position coordinates from the original assembly are used. No recombination events are observed within these three inversion intervals in each cross. (D) Trained Hidden Markov Model parameters used for fine-mapping recombination breakpoints. SNP genotypes were binned into 10 kb bins. For each fish, each bin was assigned a raw genotype of M (only marine reads), F (only freshwater reads), B (both marine and freshwater reads), or X (no data). These raw genotypes were used as the observed data in a Hidden Markov Model with hidden states M (marine), F (freshwater), or H (heterozygous). The model was trained with the Baum-Welch algorithm on 1 million data points.

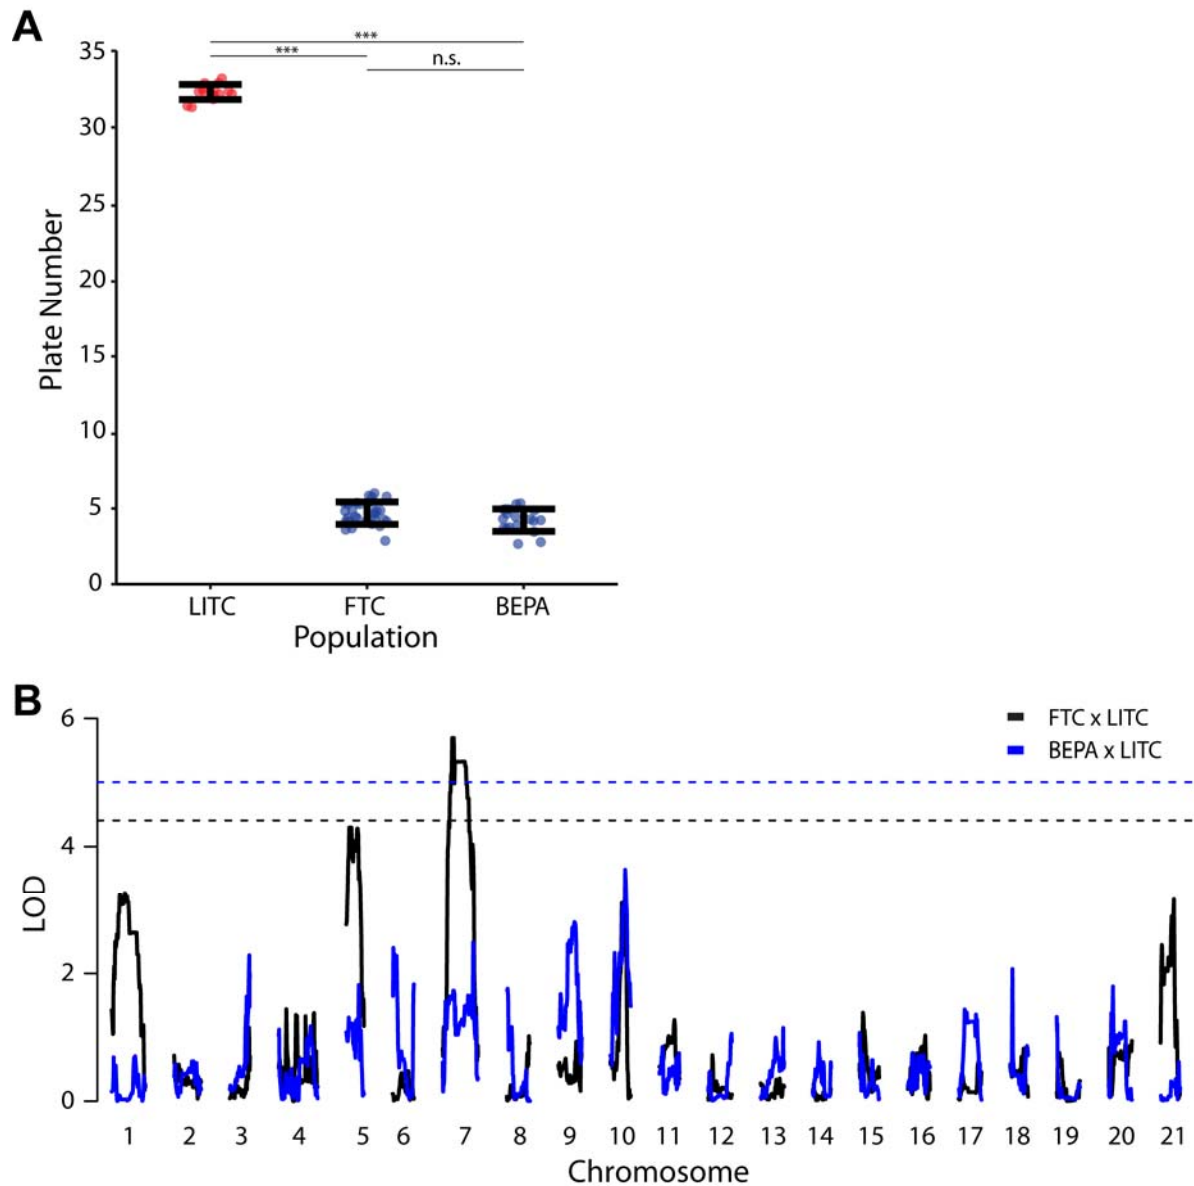

**Figure S7 QTL mapping of lateral plate modifiers**

(A) Lateral plate reduction in lab-reared FTC and BEPA freshwater fish (blue) compared to LITC marine fish (red). \*\*\* indicates  $p < 10^{-10}$ , n.s. = not significant by Tukey's HSD test. Average of left and right side plates is shown. LITC, FTC, and BEPA fish had  $32.3 \pm 0.5$ ,  $4.9 \pm 0.7$ , and  $4.4 \pm 0.7$  plates and sample sizes of 15, 30, and 19, respectively. (B) Manhattan plot of QTL mapping of lateral plate modifiers in the FTC (black) and BEPA (blue) crosses. Mapping was performed in fish heterozygous for *Eda* ( $n=184/194$  in the FTC/BEPA crosses). One QTL was detected in the FTC cross but no significant QTL were detected in the BEPA cross.  $\alpha = 0.05$  significance levels based on 1,000 permutations are shown as dotted lines. LOD is shown as a function of adjusted physical position.



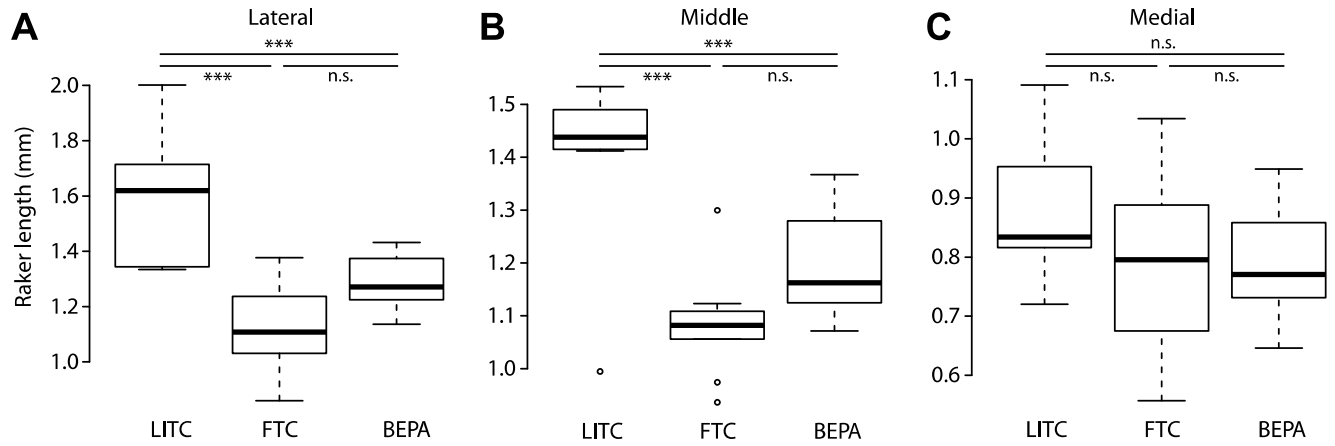

**Figure S8 Convergent evolution of freshwater gill raker length reduction**

Gill raker lengths were measured in three domains: lateral (A), middle (B), and medial (C) in marine (LITC) and freshwater (FTC and BEPA) lab-reared fish. See Figure 5A for a diagram of gill raker length measurements. Gill raker lengths were back transformed to values expected for a 50 mm standard length fish. \*\*\* indicates  $p < 0.001$ , n.s. = not significant by Tukey's HSD test.  $n = 10$  per population.

## Files S1-S4

Available for download at [www.g3journal.org/lookup/suppl/doi:10.1534/g3.115.017905/-/DC1](http://www.g3journal.org/lookup/suppl/doi:10.1534/g3.115.017905/-/DC1)

### **File S1 FTC cross summary information (.xlsx)**

The genetic map, genotypes, sex, raw phenotypes, and size-adjusted phenotypes used for mapping from the FTC cross.

### **File S2 BEPA cross summary information (.xlsx)**

The genetic map, genotypes, sex, raw phenotypes, and size-adjusted phenotypes used for mapping from the BEPA cross.

### **File S3 Summary of bins in genome assembly (.csv)**

A summary of all bins in the genome assembly, and their adjusted positions and orientations in the revised genome assembly. Orientations are defined relative to original genome assembly. The orientation of some scaffolds was not detected in this study. Bins in these scaffolds are labeled as having “unknown” orientation. Chromosome “M” is the mitochondrial genome sequence, which was not analyzed in this study but is replicated in the revised genome assembly.

### **File S4 Revised consensus scaffold order (.csv)**

Revised scaffold order for each chromosome (consensus of FTC and BEPA). Revised coordinates (based on this study) and original assembly coordinates are presented. Orientations are defined relative to original genome assembly. The orientation of some scaffolds was not detected in this study. These scaffolds are labeled as having “unknown” orientation; their orientation was not altered relative to their orientation in the original genome assembly. Chromosome “M” is the mitochondrial genome sequence, which was not analyzed in this study but is replicated in the revised genome assembly.

## Files S5-S7

Data available from the Dryad Digital Repository: <http://dx.doi.org/10.5061/dryad.q018v>

### **File S5 Revised fasta file of genome assembly (.fa)**

Fasta file containing revised genome assembly based on consensus scaffold order and orientation as described in File S4.

### **File S6 Revised masked fasta file of genome assembly (.fa)**

Repeat masked fasta file containing revised genome assembly based on consensus scaffold order and orientation as described in File S4. Repeat masked fasta file is based off the repeat masked version of the original genome assembly, which was masked with RepeatMasker.

### **File S7 Revised locations of Ensembl-predicted genes (.gtf)**

Revised .gtf file of Ensembl gene predictions. Coordinates of gene predictions were converted to the revised assembly coordinates. All Ensembl-predicted genes were included, except ENSGACT00000019430, which spans two scaffolds (11 and 79) that are not adjacent in the revised genome assembly.

## File S8

### SUPPLEMENTAL METHODS

#### Cross raising

Lab-reared fish were raised at 18°C in 110 liter (29 gallon) aquaria in a common brackish salinity (3 ppt, 10% ocean water) and fed a common diet of live *Artemia* nauplii and frozen *Daphnia* as fry and juveniles, and bloodworms and *Mysis* shrimp as adults. Adult F2s were raised to a mean size (standard length) of 38.0 mm and 42.1 mm in the FTC and BEPA crosses, respectively. Fish from F1 crosses were intercrossed to generate F2 families ranging in size from 26-108 fish. Adult F2 fish (n= 360 / 363) were sequenced with GBS from 5 and 9 F2 families in the FTC and BEPA crosses, respectively.

#### Sequencing of cross grandparents and identification of homozygous SNPs

The two grandparents of the FTC cross and the two grandparents of the BEPA cross were resequenced with a Nextera DNA Sample Preparation kit (Illumina) to approximately 60X and 6X coverage, respectively, with 100 base paired-end sequencing on an Illumina HiSeq 2000 sequencer. Reads were mapped to the reference genome with BWA ([www.bio-bwa.sourceforge.net](http://www.bio-bwa.sourceforge.net)). For each grandparent, SNPs relative to the reference genome were called with SAMtools ([www.samtools.sourceforge.net](http://www.samtools.sourceforge.net)). The SNPs in the resulting VCF files were then filtered with a custom Python script ([www.python.org](http://www.python.org)) to identify sites where one grandparent was homozygous for the alternate allele (a homozygous alternate SNP was present in the VCF file) and the other grandparent was homozygous for the reference allele (no SNP was present in the VCF file but there was sufficient sequencing coverage to support that the sample was homozygous reference). This analysis identified 1,116,087 and 715,279 sites which were homozygous different between the FTC and BEPA grandparents, respectively (“homozygous SNP positions”).

#### Genotyping from read counts

A likelihood method was adapted from (Hohenlohe et al. 2010), but with only reads supporting the phased marine or freshwater allele considered. Three possible diploid genotypes were considered:  $G_i = G_{MM}$ ,  $G_{MF}$ , or  $G_{FF}$  (M=marine allele, F=freshwater allele). Reads were considered to be independent, and have an equal chance of emanating from the two alleles. An error rate of 1% was assumed for each read, which increased the conservativeness of the genotyping calls. Bayes' theorem was used to calculate the probability of each genotype ( $G_i$ ) given the observed pattern of reads. For example, for the MM genotype:  
$$p(G_{MM} | \text{reads}) = p(\text{reads} | G_{MM}) / [p(\text{reads} | G_{MM}) + p(\text{reads} | G_{MF}) + p(\text{reads} | G_{FF})]$$
  
If one genotype  $G_i$  was most likely with  $p(G_i | \text{reads}) > 0.95$ , the genotype was assigned as  $G_i$ . Otherwise, the genotype was assigned as “MF/FF” or “MM/MF” if  $p(G_{MM}) < 0.05$  or  $p(G_{FF}) < 0.05$  (Figure S2). These genotypes were frequently called for bins spanning recombinant breakpoints. If no reads were present, a missing genotype (“NA”) was assigned.

### **Removing markers with aberrant allele ratios**

Each marker was tested for deviation from the predicted 1:2:1 allele ratio by a chi-square test. Multiple adjacent markers with allelic distortion likely indicate a true allelic distortion of that genomic region, whereas a single marker with allelic distortion likely indicates genotyping error. Therefore, markers showing significant allelic distortion ( $p < 0.05$ ) without any adjacent markers with allelic distortion were removed.

### **Sex determination**

The sex of each F2 fish was determined by calculating the ratio of chromosome 19 (sex chromosome) coverage levels to non-chromosome 19 coverage levels. For females (XX) and males (XY), the theoretical ratios are 1 and 0.5, respectively, with a cutoff of 0.75. Indeed, in each cross the ratio cleanly formed two groups. However, there was slightly more sex chromosome coverage than expected in each cross. Therefore cutoff ratios in each cross were determined manually based on the empirical ratio distribution (0.85 in the FTC cross and 1.15 in the BEPA cross). Fish above and below the cutoff ratio were assigned as female and male, respectively.

### **Creating a consensus scaffold map**

For each cross, the mean genetic positions of each scaffold in the linkage map were compared to create a scaffold map. In cases where multiple markers from the same scaffold were in the linkage map, scaffold orientation was determined by whether correlation between the physical and genetic positions of these markers was significantly positive or negative in a linear regression. A consensus scaffold map was created by merging the largely identical scaffold maps from the two crosses. In cases where the maps disagreed in marker order, the consensus map used the order from the map with the fewest discordant genotypes.

### **Recombinant breakpoint fine-mapping**

Since the markers used for linkage mapping were based on binning multiple SNPs together, a complementary approach was used to fine-map recombinant breakpoints with a Hidden Markov Model (approach adapted from Andolfatto et al. 2011). SNP genotypes were binned into 10 kb bins, near the average density of SNPs used in the study. For each fish, each bin was assigned a raw genotype of M (only marine reads), F (only freshwater reads), B (both marine and freshwater reads), or X (no data). These raw genotypes were used as the observed data in a Hidden Markov Model with hidden states M (marine), F (freshwater), or H (heterozygous). The model was trained with the Baum-Welch algorithm on 1 million data points. For each fish and bin, the model was used to calculate the probability of each hidden state with the forward-backward algorithm. Details on the trained parameters of the model are presented in Figure S6D. Locations within a scaffold where the probability switched from over 99% probability of state A to over 99% probability of state B were considered to be the boundaries of a recombination event.

### **Calling sex chromosome genotypes**

The stickleback sex chromosome (chromosome 19) consists of a small pseudo-autosomal region and a large region that behaves like a sex chromosome (Peichel et al. 2004; Roesti et al. 2013).

The cutoff for the boundary between these regions was chosen at 2.41 Mb, based on levels of sequencing coverage in male and female F2s. Genotypes for the pseudo-autosomal region were determined with the same method as the autosomal chromosomes, whereas a separate pipeline was used for the rest of the sex chromosome. First, reads that mapped to the X chromosome but not the Y chromosome were identified by sieving for SNPs that had an approximately 2:1 ratio of females to male coverage (SNPs that had female:male average RPMM ratios between 1.5 and 3.5). Female F2s should have a 3:1 ratio of X chromosomes originating from their grandmother:grandfather, whereas male F2s should have a 1:1 ratio. Therefore, a 3:1 ratio of alleles was filtered for in female F2s (average RPMM between 2 and 6) and a 1:1 ratio was filtered for in male F2s (average RPMM between 0.2 and 4). Finally, since all male F2s have a Y chromosome that originated from their grandfather, male F2 genotypes that were genotyped as homozygous for their grandmother's allele were converted to heterozygous.

### **Using read correlations to anchor scaffolds**

In addition to the linkage maps made with JoinMap, a second more sensitive, but less precise, method was used to further determine the genomic location of scaffolds. This method enabled the mapping of even more scaffolds, but did not reveal the scaffolds' precise genomic location and orientation. Every pair of markers was considered ("marker 1" and "marker 2"). Fish genotyped as homozygous marine or homozygous freshwater for marker 1 were examined. For these fish, raw read counts for marker 2 were summed and were scored as concordant or discordant with the marker 1 genotype. If the total concordance percentage was above 95%, marker 2 was considered linked to marker 1 with  $\sim < 5$  cM distance. In 300 out of 302 cases (99.3%) where a scaffold mapped to a chromosome by this method in both crosses, the chromosome was the same. The other two cases were likely due to reads mapping to repetitive genomic segments (Table S3).

### **Bone staining**

To stain bones, fish were fixed for 1-2 days in 10% neutral buffered formalin or 5-7 days in 4% paraformaldehyde in 1xPBS, washed with water overnight, stained overnight with 0.008% Alizarin Red S in 1% potassium hydroxide, destained in water overnight, and cleared in a 0.25% potassium hydroxide, 50% glycerol solution.

### **Phenotype processing**

For QTL mapping, plate number and gill raker length phenotypes were tested for an association with standard length and sex by linear regression in R ([www.r-project.org](http://www.r-project.org)) and corrected for size, sex, and/or log transformed, when appropriate. When association with standard length was significant ( $p < 0.05$ ), residuals were taken from a linear regression, then back-transformed to values expected for a 40 mm (marine x freshwater F2s) or 50 mm (lab-reared incross) standard length fish. When correlations with standard length and sex were both significant in a linear model, both were corrected for. When log transformation improved the normality of the residuals (i.e. by resulting in an Anderson-Darling test changing from  $p < 0.05$  to  $p > 0.05$ ), log transformation was performed.

## REFERENCES

- Andolfatto, P., D. Davison, D. Erezyilmaz, T.T. Hu, J. Mast *et al.*, 2011 Multiplexed shotgun genotyping for rapid and efficient genetic mapping. *Genome Res.* 21: 610-617.
- Hohenlohe, P.A., S. Bassham, P.D. Etter, N. Stiffler, E.A. Johnson *et al.*, 2010 Population genomics of parallel adaptation in threespine stickleback using sequenced RAD tags. *PLoS Genet.* 6: e1000862.
- Jones, F.C., M.G. Grabherr, Y.F. Chan, P. Russell, E. Mauceli *et al.*, 2012 The genomic basis of adaptive evolution in threespine sticklebacks. *Nature* 484: 55-61.
- Peichel, C.L., J.A. Ross, C.K. Matson, M. Dickson, J. Grimwood *et al.*, 2004 The master sex-determination locus in threespine sticklebacks is on a nascent Y chromosome. *Current Biology* 14: 1416-1424.
- Roesti, M., D. Moser, and D. Berner, 2013 Recombination in the threespine stickleback genome-patterns and consequences. *Mol. Ecol.* 22: 3014-3027.

**Table S1 Primers used in this study.** Primers were used for PCR, index sequencing (“Index”), or making adapters.

| Name        | Primer                                                                  | Type                       | Barcode  |
|-------------|-------------------------------------------------------------------------|----------------------------|----------|
| PCR1        | CAAGCAGAAGACGGCATAACGAGATCGGTCTCGGCATTCCTGCTGAAC<br>CGCTCTCCGATCT       | PCR (no indexing)          | NA       |
| PCR1_index1 | CAAGCAGAAGACGGCATAACGAGATcgtgatCGGTCTCGGCATTCCTGC<br>TGAACCGCTCTCCGATCT | PCR (indexing)             | NA       |
| PCR1_index2 | CAAGCAGAAGACGGCATAACGAGATacatcgCGGTCTCGGCATTCCTGC<br>TGAACCGCTCTCCGATCT | PCR (indexing)             | NA       |
| PCR1_index3 | CAAGCAGAAGACGGCATAACGAGATgcctaaCGGTCTCGGCATTCCTGC<br>TGAACCGCTCTCCGATCT | PCR (indexing)             | NA       |
| PCR1_index4 | CAAGCAGAAGACGGCATAACGAGATtggtcaCGGTCTCGGCATTCCTGC<br>TGAACCGCTCTCCGATCT | PCR (indexing)             | NA       |
| PCR2        | AATGATACGGCGACCACCGAGATCTACACTCTTCCCTACACGACGCT<br>CTCCGATCT            | PCR (indexing/no indexing) | NA       |
| Seq_index   | GATCGGAAGAGCGGTTCAGCAGGAATGCCGAGACCG                                    | Index                      | NA       |
| ApeK1Y_A1F  | ACACTCTTCCCTACACGACGCTCTCCGATCTctcc                                     | Adapter                    | ctcc     |
| ApeK1Y_A2F  | ACACTCTTCCCTACACGACGCTCTCCGATCTgca                                      | Adapter                    | tgca     |
| ApeK1Y_A3F  | ACACTCTTCCCTACACGACGCTCTCCGATCTacta                                     | Adapter                    | acta     |
| ApeK1Y_A4F  | ACACTCTTCCCTACACGACGCTCTCCGATCTcaga                                     | Adapter                    | caga     |
| ApeK1Y_A5F  | ACACTCTTCCCTACACGACGCTCTCCGATCTaact                                     | Adapter                    | aact     |
| ApeK1Y_A6F  | ACACTCTTCCCTACACGACGCTCTCCGATCTgctg                                     | Adapter                    | gctg     |
| ApeK1Y_A7F  | ACACTCTTCCCTACACGACGCTCTCCGATCTcgat                                     | Adapter                    | cgat     |
| ApeK1Y_A8F  | ACACTCTTCCCTACACGACGCTCTCCGATCTgtaa                                     | Adapter                    | gtaa     |
| ApeK1Y_A9F  | ACACTCTTCCCTACACGACGCTCTCCGATCTgcca                                     | Adapter                    | tgcca    |
| ApeK1Y_A10F | ACACTCTTCCCTACACGACGCTCTCCGATCTcgctt                                    | Adapter                    | cgctt    |
| ApeK1Y_A11F | ACACTCTTCCCTACACGACGCTCTCCGATCTcacc                                     | Adapter                    | tcacc    |
| ApeK1Y_A12F | ACACTCTTCCCTACACGACGCTCTCCGATCTtagc                                     | Adapter                    | ctagc    |
| ApeK1Y_B1F  | ACACTCTTCCCTACACGACGCTCTCCGATCTacaaa                                    | Adapter                    | acaaa    |
| ApeK1Y_B2F  | ACACTCTTCCCTACACGACGCTCTCCGATCTtctc                                     | Adapter                    | ttctc    |
| ApeK1Y_B3F  | ACACTCTTCCCTACACGACGCTCTCCGATCTagccc                                    | Adapter                    | agccc    |
| ApeK1Y_B4F  | ACACTCTTCCCTACACGACGCTCTCCGATCTgtatt                                    | Adapter                    | gtatt    |
| ApeK1Y_B5F  | ACACTCTTCCCTACACGACGCTCTCCGATCTctgta                                    | Adapter                    | ctgta    |
| ApeK1Y_B6F  | ACACTCTTCCCTACACGACGCTCTCCGATCTaccgt                                    | Adapter                    | accgt    |
| ApeK1Y_B7F  | ACACTCTTCCCTACACGACGCTCTCCGATCTgctta                                    | Adapter                    | gctta    |
| ApeK1Y_B8F  | ACACTCTTCCCTACACGACGCTCTCCGATCTggtgt                                    | Adapter                    | ggtgt    |
| ApeK1Y_B9F  | ACACTCTTCCCTACACGACGCTCTCCGATCTggtgt                                    | Adapter                    | ggtgt    |
| ApeK1Y_B10F | ACACTCTTCCCTACACGACGCTCTCCGATCTccagct                                   | Adapter                    | ccagct   |
| ApeK1Y_B11F | ACACTCTTCCCTACACGACGCTCTCCGATCTtcaga                                    | Adapter                    | ttcaga   |
| ApeK1Y_B12F | ACACTCTTCCCTACACGACGCTCTCCGATCTtaggaa                                   | Adapter                    | taggaa   |
| ApeK1Y_C1F  | ACACTCTTCCCTACACGACGCTCTCCGATCTgctcta                                   | Adapter                    | gctcta   |
| ApeK1Y_C2F  | ACACTCTTCCCTACACGACGCTCTCCGATCTccacaa                                   | Adapter                    | ccacaa   |
| ApeK1Y_C3F  | ACACTCTTCCCTACACGACGCTCTCCGATCTctcca                                    | Adapter                    | ctcca    |
| ApeK1Y_C4F  | ACACTCTTCCCTACACGACGCTCTCCGATCTgagata                                   | Adapter                    | gagata   |
| ApeK1Y_C5F  | ACACTCTTCCCTACACGACGCTCTCCGATCTatgctt                                   | Adapter                    | atgctt   |
| ApeK1Y_C6F  | ACACTCTTCCCTACACGACGCTCTCCGATCTagtgga                                   | Adapter                    | agtgga   |
| ApeK1Y_C7F  | ACACTCTTCCCTACACGACGCTCTCCGATCTtattttt                                  | Adapter                    | tattttt  |
| ApeK1Y_C8F  | ACACTCTTCCCTACACGACGCTCTCCGATCTcttgctt                                  | Adapter                    | cttgctt  |
| ApeK1Y_C9F  | ACACTCTTCCCTACACGACGCTCTCCGATCTatgaaaac                                 | Adapter                    | atgaaaac |
| ApeK1Y_C10F | ACACTCTTCCCTACACGACGCTCTCCGATCTaaaagtt                                  | Adapter                    | aaaagtt  |
| ApeK1Y_C11F | ACACTCTTCCCTACACGACGCTCTCCGATCTgaattca                                  | Adapter                    | gaattca  |
| ApeK1Y_C12F | ACACTCTTCCCTACACGACGCTCTCCGATCTgaacttc                                  | Adapter                    | gaacttc  |
| ApeK1Y_D1F  | ACACTCTTCCCTACACGACGCTCTCCGATCTggacctta                                 | Adapter                    | ggacctta |
| ApeK1Y_D2F  | ACACTCTTCCCTACACGACGCTCTCCGATCTgtcgatt                                  | Adapter                    | gtcgatt  |
| ApeK1Y_D3F  | ACACTCTTCCCTACACGACGCTCTCCGATCTaacgcct                                  | Adapter                    | aacgcct  |
| ApeK1Y_D4F  | ACACTCTTCCCTACACGACGCTCTCCGATCTaatatgc                                  | Adapter                    | aatatgc  |
| ApeK1Y_D5F  | ACACTCTTCCCTACACGACGCTCTCCGATCTacgactac                                 | Adapter                    | acgactac |



|             |                                            |         |          |
|-------------|--------------------------------------------|---------|----------|
| ApeK1Y_D6F  | ACACTCTTTCCCTACACGACGCTCTCCGATCTtagcatgc   | Adapter | tagcatgc |
| ApeK1Y_D7F  | ACACTCTTTCCCTACACGACGCTCTCCGATCTtaggccat   | Adapter | taggccat |
| ApeK1Y_D8F  | ACACTCTTTCCCTACACGACGCTCTCCGATCTtgcaagga   | Adapter | tgcaagga |
| ApeK1Y_D9F  | ACACTCTTTCCCTACACGACGCTCTCCGATCTtggtacgt   | Adapter | tggtacgt |
| ApeK1Y_D10F | ACACTCTTTCCCTACACGACGCTCTCCGATCTtctcagtc   | Adapter | tctcagtc |
| ApeK1Y_D11F | ACACTCTTTCCCTACACGACGCTCTCCGATCTccggatat   | Adapter | ccggatat |
| ApeK1Y_D12F | ACACTCTTTCCCTACACGACGCTCTCCGATCTcgccttat   | Adapter | cgccttat |
| ApeK1Y_E1F  | ACACTCTTTCCCTACACGACGCTCTCCGATCTaggc       | Adapter | aggc     |
| ApeK1Y_E2F  | ACACTCTTTCCCTACACGACGCTCTCCGATCTgatc       | Adapter | gatc     |
| ApeK1Y_E3F  | ACACTCTTTCCCTACACGACGCTCTCCGATCTtcac       | Adapter | tcac     |
| ApeK1Y_E4F  | ACACTCTTTCCCTACACGACGCTCTCCGATCTaggat      | Adapter | aggat    |
| ApeK1Y_E5F  | ACACTCTTTCCCTACACGACGCTCTCCGATCTattga      | Adapter | attga    |
| ApeK1Y_E6F  | ACACTCTTTCCCTACACGACGCTCTCCGATCTcatct      | Adapter | catct    |
| ApeK1Y_E7F  | ACACTCTTTCCCTACACGACGCTCTCCGATCTcctac      | Adapter | cctac    |
| ApeK1Y_E8F  | ACACTCTTTCCCTACACGACGCTCTCCGATCTgagga      | Adapter | gagga    |
| ApeK1Y_E9F  | ACACTCTTTCCCTACACGACGCTCTCCGATCTggaac      | Adapter | ggaac    |
| ApeK1Y_E10F | ACACTCTTTCCCTACACGACGCTCTCCGATCTgtcaa      | Adapter | gtcaa    |
| ApeK1Y_E11F | ACACTCTTTCCCTACACGACGCTCTCCGATCTtaata      | Adapter | taata    |
| ApeK1Y_E12F | ACACTCTTTCCCTACACGACGCTCTCCGATCTacat       | Adapter | tacat    |
| ApeK1Y_F1F  | ACACTCTTTCCCTACACGACGCTCTCCGATCTcggt       | Adapter | tcggt    |
| ApeK1Y_F2F  | ACACTCTTTCCCTACACGACGCTCTCCGATCTacctaa     | Adapter | acctaa   |
| ApeK1Y_F3F  | ACACTCTTTCCCTACACGACGCTCTCCGATCTatatgt     | Adapter | atatgt   |
| ApeK1Y_F4F  | ACACTCTTTCCCTACACGACGCTCTCCGATCTatcgta     | Adapter | atcgta   |
| ApeK1Y_F5F  | ACACTCTTTCCCTACACGACGCTCTCCGATCTcatcgt     | Adapter | catcgt   |
| ApeK1Y_F6F  | ACACTCTTTCCCTACACGACGCTCTCCGATCTcgcggt     | Adapter | cgcggt   |
| ApeK1Y_F7F  | ACACTCTTTCCCTACACGACGCTCTCCGATCTctatta     | Adapter | ctatta   |
| ApeK1Y_F8F  | ACACTCTTTCCCTACACGACGCTCTCCGATCTgccagt     | Adapter | gccagt   |
| ApeK1Y_F9F  | ACACTCTTTCCCTACACGACGCTCTCCGATCTggaaga     | Adapter | ggaaga   |
| ApeK1Y_F10F | ACACTCTTTCCCTACACGACGCTCTCCGATCTgtactt     | Adapter | gtactt   |
| ApeK1Y_F11F | ACACTCTTTCCCTACACGACGCTCTCCGATCTgttgaa     | Adapter | gttgaa   |
| ApeK1Y_F12F | ACACTCTTTCCCTACACGACGCTCTCCGATCTaacga      | Adapter | taacga   |
| ApeK1Y_G1F  | ACACTCTTTCCCTACACGACGCTCTCCGATCTggcta      | Adapter | tggtcta  |
| ApeK1Y_G2F  | ACACTCTTTCCCTACACGACGCTCTCCGATCTacgtgtt    | Adapter | acgtgtt  |
| ApeK1Y_G3F  | ACACTCTTTCCCTACACGACGCTCTCCGATCTattaatt    | Adapter | attaatt  |
| ApeK1Y_G4F  | ACACTCTTTCCCTACACGACGCTCTCCGATCTattggat    | Adapter | attggat  |
| ApeK1Y_G5F  | ACACTCTTTCCCTACACGACGCTCTCCGATCTcataagt    | Adapter | cataagt  |
| ApeK1Y_G6F  | ACACTCTTTCCCTACACGACGCTCTCCGATCTcgctgat    | Adapter | cgctgat  |
| ApeK1Y_G7F  | ACACTCTTTCCCTACACGACGCTCTCCGATCTcggtaga    | Adapter | cggtaga  |
| ApeK1Y_G8F  | ACACTCTTTCCCTACACGACGCTCTCCGATCTctacgga    | Adapter | ctacgga  |
| ApeK1Y_G9F  | ACACTCTTTCCCTACACGACGCTCTCCGATCTgcggaat    | Adapter | gcggaat  |
| ApeK1Y_G10F | ACACTCTTTCCCTACACGACGCTCTCCGATCTtagcgga    | Adapter | tagcgga  |
| ApeK1Y_G11F | ACACTCTTTCCCTACACGACGCTCTCCGATCTtcaaga     | Adapter | tcaaga   |
| ApeK1Y_G12F | ACACTCTTTCCCTACACGACGCTCTCCGATCTtctgtga    | Adapter | tctgtga  |
| ApeK1Y_H1F  | ACACTCTTTCCCTACACGACGCTCTCCGATCTgtctgga    | Adapter | tgctgga  |
| ApeK1Y_H2F  | ACACTCTTTCCCTACACGACGCTCTCCGATCTaaccgaga   | Adapter | aaccgaga |
| ApeK1Y_H3F  | ACACTCTTTCCCTACACGACGCTCTCCGATCTacagggaa   | Adapter | acagggaa |
| ApeK1Y_H4F  | ACACTCTTTCCCTACACGACGCTCTCCGATCTacgtgga    | Adapter | acgtgga  |
| ApeK1Y_H5F  | ACACTCTTTCCCTACACGACGCTCTCCGATCTccatgggt   | Adapter | ccatgggt |
| ApeK1Y_H6F  | ACACTCTTTCCCTACACGACGCTCTCCGATCTcgcggaga   | Adapter | cgcggaga |
| ApeK1Y_H7F  | ACACTCTTTCCCTACACGACGCTCTCCGATCTcgtgtggt   | Adapter | cgtgtggt |
| ApeK1Y_H8F  | ACACTCTTTCCCTACACGACGCTCTCCGATCTgctgtgga   | Adapter | gctgtgga |
| ApeK1Y_H9F  | ACACTCTTTCCCTACACGACGCTCTCCGATCTggattggt   | Adapter | ggattggt |
| ApeK1Y_H10F | ACACTCTTTCCCTACACGACGCTCTCCGATCTgtgagggt   | Adapter | gtgagggt |
| ApeK1Y_H11F | ACACTCTTTCCCTACACGACGCTCTCCGATCTtatcgga    | Adapter | tatcgga  |
| ApeK1Y_H12F | ACACTCTTTCCCTACACGACGCTCTCCGATCTtctcgga    | Adapter | tctcgga  |
| ApeK1Y_A1R  | pCWGggagAGATCGGAAGAGCGGTTCCAGCAGGAATGCCGAG | Adapter | NA       |
| ApeK1Y_A2R  | pCWGtgcaAGATCGGAAGAGCGGTTCCAGCAGGAATGCCGAG | Adapter | NA       |
| ApeK1Y_A3R  | pCWGtagtAGATCGGAAGAGCGGTTCCAGCAGGAATGCCGAG | Adapter | NA       |

|             |                                                |         |    |
|-------------|------------------------------------------------|---------|----|
| ApeK1Y_A4R  | pCWGtctgAGATCGGAAGAGCGGTTTCAGCAGGAATGCCGAG     | Adapter | NA |
| ApeK1Y_A5R  | pCWGagttAGATCGGAAGAGCGGTTTCAGCAGGAATGCCGAG     | Adapter | NA |
| ApeK1Y_A6R  | pCWGagcgAGATCGGAAGAGCGGTTTCAGCAGGAATGCCGAG     | Adapter | NA |
| ApeK1Y_A7R  | pCWGatcgAGATCGGAAGAGCGGTTTCAGCAGGAATGCCGAG     | Adapter | NA |
| ApeK1Y_A8R  | pCWGttacAGATCGGAAGAGCGGTTTCAGCAGGAATGCCGAG     | Adapter | NA |
| ApeK1Y_A9R  | pCWGtccaAGATCGGAAGAGCGGTTTCAGCAGGAATGCCGAG     | Adapter | NA |
| ApeK1Y_A10R | pCWGaagcgAGATCGGAAGAGCGGTTTCAGCAGGAATGCCGAG    | Adapter | NA |
| ApeK1Y_A11R | pCWGggtgaAGATCGGAAGAGCGGTTTCAGCAGGAATGCCGAG    | Adapter | NA |
| ApeK1Y_A12R | pCWGgtagAGATCGGAAGAGCGGTTTCAGCAGGAATGCCGAG     | Adapter | NA |
| ApeK1Y_B1R  | pCWGttgtAGATCGGAAGAGCGGTTTCAGCAGGAATGCCGAG     | Adapter | NA |
| ApeK1Y_B2R  | pCWGgagaaAGATCGGAAGAGCGGTTTCAGCAGGAATGCCGAG    | Adapter | NA |
| ApeK1Y_B3R  | pCWGgggctAGATCGGAAGAGCGGTTTCAGCAGGAATGCCGAG    | Adapter | NA |
| ApeK1Y_B4R  | pCWGaatacAGATCGGAAGAGCGGTTTCAGCAGGAATGCCGAG    | Adapter | NA |
| ApeK1Y_B5R  | pCWGtacagAGATCGGAAGAGCGGTTTCAGCAGGAATGCCGAG    | Adapter | NA |
| ApeK1Y_B6R  | pCWGacggtAGATCGGAAGAGCGGTTTCAGCAGGAATGCCGAG    | Adapter | NA |
| ApeK1Y_B7R  | pCWGtaagcAGATCGGAAGAGCGGTTTCAGCAGGAATGCCGAG    | Adapter | NA |
| ApeK1Y_B8R  | pCWGacaccAGATCGGAAGAGCGGTTTCAGCAGGAATGCCGAG    | Adapter | NA |
| ApeK1Y_B9R  | pCWGacaaccAGATCGGAAGAGCGGTTTCAGCAGGAATGCCGAG   | Adapter | NA |
| ApeK1Y_B10R | pCWGagctggAGATCGGAAGAGCGGTTTCAGCAGGAATGCCGAG   | Adapter | NA |
| ApeK1Y_B11R | pCWGtctgaaAGATCGGAAGAGCGGTTTCAGCAGGAATGCCGAG   | Adapter | NA |
| ApeK1Y_B12R | pCWGttcctaAGATCGGAAGAGCGGTTTCAGCAGGAATGCCGAG   | Adapter | NA |
| ApeK1Y_C1R  | pCWGtagagcAGATCGGAAGAGCGGTTTCAGCAGGAATGCCGAG   | Adapter | NA |
| ApeK1Y_C2R  | pCWGttgtgAGATCGGAAGAGCGGTTTCAGCAGGAATGCCGAG    | Adapter | NA |
| ApeK1Y_C3R  | pCWGtgaagAGATCGGAAGAGCGGTTTCAGCAGGAATGCCGAG    | Adapter | NA |
| ApeK1Y_C4R  | pCWGtatctcAGATCGGAAGAGCGGTTTCAGCAGGAATGCCGAG   | Adapter | NA |
| ApeK1Y_C5R  | pCWGaggcatAGATCGGAAGAGCGGTTTCAGCAGGAATGCCGAG   | Adapter | NA |
| ApeK1Y_C6R  | pCWGtccactAGATCGGAAGAGCGGTTTCAGCAGGAATGCCGAG   | Adapter | NA |
| ApeK1Y_C7R  | pCWGaaaaataAGATCGGAAGAGCGGTTTCAGCAGGAATGCCGAG  | Adapter | NA |
| ApeK1Y_C8R  | pCWGaagcaagAGATCGGAAGAGCGGTTTCAGCAGGAATGCCGAG  | Adapter | NA |
| ApeK1Y_C9R  | pCWGgtttcatAGATCGGAAGAGCGGTTTCAGCAGGAATGCCGAG  | Adapter | NA |
| ApeK1Y_C10R | pCWGaacttttAGATCGGAAGAGCGGTTTCAGCAGGAATGCCGAG  | Adapter | NA |
| ApeK1Y_C11R | pCWGtgaattcAGATCGGAAGAGCGGTTTCAGCAGGAATGCCGAG  | Adapter | NA |
| ApeK1Y_C12R | pCWGgaagttcAGATCGGAAGAGCGGTTTCAGCAGGAATGCCGAG  | Adapter | NA |
| ApeK1Y_D1R  | pCWGtaggtccAGATCGGAAGAGCGGTTTCAGCAGGAATGCCGAG  | Adapter | NA |
| ApeK1Y_D2R  | pCWGaatcgacAGATCGGAAGAGCGGTTTCAGCAGGAATGCCGAG  | Adapter | NA |
| ApeK1Y_D3R  | pCWGaggcgttAGATCGGAAGAGCGGTTTCAGCAGGAATGCCGAG  | Adapter | NA |
| ApeK1Y_D4R  | pCWGgcatattAGATCGGAAGAGCGGTTTCAGCAGGAATGCCGAG  | Adapter | NA |
| ApeK1Y_D5R  | pCWGgtagtctAGATCGGAAGAGCGGTTTCAGCAGGAATGCCGAG  | Adapter | NA |
| ApeK1Y_D6R  | pCWGgcatgctaAGATCGGAAGAGCGGTTTCAGCAGGAATGCCGAG | Adapter | NA |
| ApeK1Y_D7R  | pCWGatggcctaAGATCGGAAGAGCGGTTTCAGCAGGAATGCCGAG | Adapter | NA |
| ApeK1Y_D8R  | pCWGtcttgcaAGATCGGAAGAGCGGTTTCAGCAGGAATGCCGAG  | Adapter | NA |
| ApeK1Y_D9R  | pCWGgactaccaAGATCGGAAGAGCGGTTTCAGCAGGAATGCCGAG | Adapter | NA |
| ApeK1Y_D10R | pCWGgactgagaAGATCGGAAGAGCGGTTTCAGCAGGAATGCCGAG | Adapter | NA |
| ApeK1Y_D11R | pCWGataccggAGATCGGAAGAGCGGTTTCAGCAGGAATGCCGAG  | Adapter | NA |
| ApeK1Y_D12R | pCWGataaggcgAGATCGGAAGAGCGGTTTCAGCAGGAATGCCGAG | Adapter | NA |
| ApeK1Y_E1R  | pCWGgcctAGATCGGAAGAGCGGTTTCAGCAGGAATGCCGAG     | Adapter | NA |
| ApeK1Y_E2R  | pCWGgatcAGATCGGAAGAGCGGTTTCAGCAGGAATGCCGAG     | Adapter | NA |
| ApeK1Y_E3R  | pCWGgtgaAGATCGGAAGAGCGGTTTCAGCAGGAATGCCGAG     | Adapter | NA |
| ApeK1Y_E4R  | pCWGatcctAGATCGGAAGAGCGGTTTCAGCAGGAATGCCGAG    | Adapter | NA |
| ApeK1Y_E5R  | pCWGtcaatAGATCGGAAGAGCGGTTTCAGCAGGAATGCCGAG    | Adapter | NA |
| ApeK1Y_E6R  | pCWGgatgAGATCGGAAGAGCGGTTTCAGCAGGAATGCCGAG     | Adapter | NA |
| ApeK1Y_E7R  | pCWGgttaggAGATCGGAAGAGCGGTTTCAGCAGGAATGCCGAG   | Adapter | NA |
| ApeK1Y_E8R  | pCWGtctcAGATCGGAAGAGCGGTTTCAGCAGGAATGCCGAG     | Adapter | NA |
| ApeK1Y_E9R  | pCWGgttccAGATCGGAAGAGCGGTTTCAGCAGGAATGCCGAG    | Adapter | NA |
| ApeK1Y_E10R | pCWGttgacAGATCGGAAGAGCGGTTTCAGCAGGAATGCCGAG    | Adapter | NA |
| ApeK1Y_E11R | pCWGtattaAGATCGGAAGAGCGGTTTCAGCAGGAATGCCGAG    | Adapter | NA |
| ApeK1Y_E12R | pCWGatgtaAGATCGGAAGAGCGGTTTCAGCAGGAATGCCGAG    | Adapter | NA |
| ApeK1Y_F1R  | pCWGaacgaAGATCGGAAGAGCGGTTTCAGCAGGAATGCCGAG    | Adapter | NA |

|             |                                                 |         |    |
|-------------|-------------------------------------------------|---------|----|
| ApeK1Y_F2R  | pCWGttaggtAGATCGGAAGAGCGGTTTCAGCAGGAATGCCGAG    | Adapter | NA |
| ApeK1Y_F3R  | pCWGacatatAGATCGGAAGAGCGGTTTCAGCAGGAATGCCGAG    | Adapter | NA |
| ApeK1Y_F4R  | pCWGtacgatAGATCGGAAGAGCGGTTTCAGCAGGAATGCCGAG    | Adapter | NA |
| ApeK1Y_F5R  | pCWGacgatgAGATCGGAAGAGCGGTTTCAGCAGGAATGCCGAG    | Adapter | NA |
| ApeK1Y_F6R  | pCWGaccgagAGATCGGAAGAGCGGTTTCAGCAGGAATGCCGAG    | Adapter | NA |
| ApeK1Y_F7R  | pCWGtaataagAGATCGGAAGAGCGGTTTCAGCAGGAATGCCGAG   | Adapter | NA |
| ApeK1Y_F8R  | pCWGactggcAGATCGGAAGAGCGGTTTCAGCAGGAATGCCGAG    | Adapter | NA |
| ApeK1Y_F9R  | pCWGtcttccAGATCGGAAGAGCGGTTTCAGCAGGAATGCCGAG    | Adapter | NA |
| ApeK1Y_F10R | pCWGgaagtagAGATCGGAAGAGCGGTTTCAGCAGGAATGCCGAG   | Adapter | NA |
| ApeK1Y_F11R | pCWGttcaacAGATCGGAAGAGCGGTTTCAGCAGGAATGCCGAG    | Adapter | NA |
| ApeK1Y_F12R | pCWGtctgtaAGATCGGAAGAGCGGTTTCAGCAGGAATGCCGAG    | Adapter | NA |
| ApeK1Y_G1R  | pCWGtagccaAGATCGGAAGAGCGGTTTCAGCAGGAATGCCGAG    | Adapter | NA |
| ApeK1Y_G2R  | pCWGaacacgtAGATCGGAAGAGCGGTTTCAGCAGGAATGCCGAG   | Adapter | NA |
| ApeK1Y_G3R  | pCWGaatcaatAGATCGGAAGAGCGGTTTCAGCAGGAATGCCGAG   | Adapter | NA |
| ApeK1Y_G4R  | pCWGatccaatAGATCGGAAGAGCGGTTTCAGCAGGAATGCCGAG   | Adapter | NA |
| ApeK1Y_G5R  | pCWGacttatgAGATCGGAAGAGCGGTTTCAGCAGGAATGCCGAG   | Adapter | NA |
| ApeK1Y_G6R  | pCWGatcagcgAGATCGGAAGAGCGGTTTCAGCAGGAATGCCGAG   | Adapter | NA |
| ApeK1Y_G7R  | pCWGtctaccgAGATCGGAAGAGCGGTTTCAGCAGGAATGCCGAG   | Adapter | NA |
| ApeK1Y_G8R  | pCWGtccgtagAGATCGGAAGAGCGGTTTCAGCAGGAATGCCGAG   | Adapter | NA |
| ApeK1Y_G9R  | pCWGattccgcAGATCGGAAGAGCGGTTTCAGCAGGAATGCCGAG   | Adapter | NA |
| ApeK1Y_G10R | pCWGtccgctaAGATCGGAAGAGCGGTTTCAGCAGGAATGCCGAG   | Adapter | NA |
| ApeK1Y_G11R | pCWGtcttccaAGATCGGAAGAGCGGTTTCAGCAGGAATGCCGAG   | Adapter | NA |
| ApeK1Y_G12R | pCWGtcacagaAGATCGGAAGAGCGGTTTCAGCAGGAATGCCGAG   | Adapter | NA |
| ApeK1Y_H1R  | pCWGtccagcaAGATCGGAAGAGCGGTTTCAGCAGGAATGCCGAG   | Adapter | NA |
| ApeK1Y_H2R  | pCWGtctcggttAGATCGGAAGAGCGGTTTCAGCAGGAATGCCGAG  | Adapter | NA |
| ApeK1Y_H3R  | pCWGttccctgtAGATCGGAAGAGCGGTTTCAGCAGGAATGCCGAG  | Adapter | NA |
| ApeK1Y_H4R  | pCWGtaccacgtAGATCGGAAGAGCGGTTTCAGCAGGAATGCCGAG  | Adapter | NA |
| ApeK1Y_H5R  | pCWGaccatggAGATCGGAAGAGCGGTTTCAGCAGGAATGCCGAG   | Adapter | NA |
| ApeK1Y_H6R  | pCWGtctccgagAGATCGGAAGAGCGGTTTCAGCAGGAATGCCGAG  | Adapter | NA |
| ApeK1Y_H7R  | pCWGaccacagcAGATCGGAAGAGCGGTTTCAGCAGGAATGCCGAG  | Adapter | NA |
| ApeK1Y_H8R  | pCWGtccacagcAGATCGGAAGAGCGGTTTCAGCAGGAATGCCGAG  | Adapter | NA |
| ApeK1Y_H9R  | pCWGaccaatccAGATCGGAAGAGCGGTTTCAGCAGGAATGCCGAG  | Adapter | NA |
| ApeK1Y_H10R | pCWGaccctcacAGATCGGAAGAGCGGTTTCAGCAGGAATGCCGAG  | Adapter | NA |
| ApeK1Y_H11R | pCWGtcccagataAGATCGGAAGAGCGGTTTCAGCAGGAATGCCGAG | Adapter | NA |
| ApeK1Y_H12R | pCWGtccaggaaAGATCGGAAGAGCGGTTTCAGCAGGAATGCCGAG  | Adapter | NA |

**Table S2 Cross summary statistics.** Numbers of initial samples, dropped samples due to low coverage, and final samples are presented. Numbers of initial markers, dropped markers due to low coverage and skewed allele ratios, and final markers are presented. GP=grandparent. Genotype fail % = percentage of missing genotypes.

| Cross | GP SNPs   | F2 SNPs used | Samples |              |       | Markers |              |                     |       | SNP Coverage | Marker Coverage | Genotype Fail % |
|-------|-----------|--------------|---------|--------------|-------|---------|--------------|---------------------|-------|--------------|-----------------|-----------------|
|       |           |              | Initial | Low coverage | Final | Initial | Low coverage | Skewed allele ratio | Final |              |                 |                 |
| FTC   | 1,116,087 | 131,091      | 358     | 2            | 356   | 1,085   | 59           | 25                  | 1,001 | 1.63X        | 197X            | 1.9             |
| BEPA  | 715,279   | 87,419       | 361     | 2            | 359   | 1,077   | 39           | 60                  | 978   | 1.73X        | 140X            | 1.8             |

**Table S3 Anchored scaffolds**

Details of 538 scaffolds that are linked to a chromosome. Some of these scaffolds were mapped in the core FTC and/or BEPA maps—the centiMorgan (cM) range and orientation (if known) of these scaffolds is shown under “Map cM”. A further approach (see Methods) used read correlations to anchor additional scaffolds. For scaffolds anchored with this approach, the cM position of the highest correlating marker in the core map is presented under “RC cM”. “Markers” indicates the number of binned markers in the scaffold.

| Scaffold | Original location |                   |            | Revised location |             |         | FTC Cross |           |       | BEPA Cross |            |       | Note |
|----------|-------------------|-------------------|------------|------------------|-------------|---------|-----------|-----------|-------|------------|------------|-------|------|
|          | Chr               | Position          | Length     | Chr              | Orientation | Markers | SNPs      | Map cM    | RC cM | SNPs       | Map cM     | RC cM |      |
| 0        | 2                 | 966608-22375856   | 21,409,249 | 2                | Forward     | 43      | 5,763     | 1.0-76.4  | 27.6  | 3,803      | 3.4-92.2   | 37.9  |      |
| 1        | 7                 | 10411930-27613546 | 17,201,617 | 7                | Forward     | 35      | 9,402     | 48.8-95.1 | 50.1  | 6,263      | 69.7-122.1 | 74.1  |      |
| 2        | 20                | 834142-17950836   | 17,116,695 | 20               | Reverse     | 35      | 7,599     | 21.6-74.6 | 73.3  | 4,465      | 29.4-91.6  | 64.9  |      |
| 3        | 19                | 3824254-20240660  | 16,416,407 | 19               | Reverse     | 33      | 5,191     | 41.5-74.3 | 43.9  | 2,541      | 55.2-89.5  | 61.7  |      |
| 4        | 13                | 2825158-18481171  | 15,656,014 | 13               | Forward     | 32      | 3,748     | 3.5-39.2  | 21.1  | 2,810      | 12.5-54.5  | 29.7  |      |
| 5        | 10                | 1-14541209        | 14,541,209 | 10               | Forward     | 30      | 2,971     | 0.0-62.2  | 25.3  | 3,081      | 6.1-83.9   | 32    |      |
| 6        | 12                | 2209412-16547614  | 14,338,203 | 12               | Reverse     | 29      | 5,301     | 46.0-68.0 | 66.5  | 3,554      | 52.4-79.2  | 53.1  |      |
| 7        | 1                 | 5935398-19921301  | 13,985,904 | 1                | Forward     | 28      | 10,293    | 47.7-54.1 | 51.2  | 2,876      | 53.0-73.8  | 73.8  |      |
| 8        | 9                 | 4309200-17894190  | 13,584,991 | 9                | Reverse     | 28      | 3,359     | 20.5-47.2 | 20.5  | 3,242      | 35.2-70.0  | 41.8  |      |
| 9        | 8                 | 4501841-18121348  | 13,619,508 | 8                | Forward     | 28      | 5,214     | 22.8-60.8 | 29.5  | 3,390      | 30.0-77.2  | 37.4  |      |
| 10       | 15                | 1070869-14379835  | 13,308,967 | 15               | Forward     | 27      | 1,814     | 20.8-65.3 | 53.5  | 1,975      | 18.5-71.1  | 56.1  |      |
| 11       | 11                | 2205540-15151913  | 12,946,374 | 11               | Forward     | 26      | 5,117     | 3.2-40.5  | 15.1  | 4,125      | 8.6-57.8   | 25.8  |      |
| 12       | 14                | 346722-13082935   | 12,736,214 | 14               | Forward     | 26      | 1,560     | 6.7-67.0  | 64.7  | 1,860      | 5.6-62.6   | 49.8  |      |
| 13       | 6                 | 4057780-16417534  | 12,359,755 | 6                | Forward     | 25      | 2,362     | 10.7-54.3 | 18.9  | 1,804      | 23.3-74.4  | 31.9  |      |
| 14       | 16                | 5282403-16168747  | 10,886,345 | 16               | Forward     | 22      | 2,851     | 21.9-38.1 | 30    | 1,679      | 26.9-51.3  | 51.3  |      |
| 15       | 3                 | 3269601-14097026  | 10,827,426 | 3                | Forward     | 22      | 1,875     | 12.8-31.8 | 17.5  | 1,628      | 22.8-41.8  | 28.8  |      |
| 16       | 21                | 298071-9494732    | 9,196,662  | 21               | Forward     | 19      | 6,476     | 10.9-23.2 | 11.6  | 4,166      | 13.0-28.2  | 17.9  |      |
| 17       | 4                 | 9036585-17819056  | 8,782,472  | 4                | Forward     | 18      | 6,266     | 51.6-58.6 | 58.1  | 3,651      | 49.5-63.1  | 62.8  |      |
| 18       | 17                | 6449158-14603141  | 8,153,984  | 17               | Forward     | 17      | 1,542     | 34.2-69.1 | 69.1  | 1,218      | 53.6-101.8 | 53.6  |      |
| 19       | 5                 | 1-7877689         | 7,877,689  | 5                | Reverse     | 16      | 2,242     | 6.0-19.3  | 11.1  | 1,534      | 12.9-25.3  | 14.4  |      |
| 20       | 4                 | 1174335-9035584   | 7,861,250  | 4                | Forward     | 16      | 2,790     | 7.6-51.5  | 51.6  | 1,760      | 8.6-49.3   | 49.3  |      |
| 21       | 18                | 4823595-12228020  | 7,404,426  | 18               | Forward     | 15      | 1,065     | 17.1-29.6 | 28.5  | 928        | 28.2-43.0  | 28.5  |      |
| 22       | 1                 | 19922302-27290228 | 7,367,927  | 1                | Reverse     | 15      | 2,431     | 52.0-71.6 | 58.4  | 2,239      | 75.1-104.9 | 91.2  |      |
| 23       | 7                 | 4609159-10410929  | 5,801,771  | 7                | Forward     | 12      | 3,917     | 45.4-48.8 | 48.5  | 1,652      | 63.7-69.3  | 69.1  |      |
| 24       | 4                 | 22731829-28355687 | 5,623,859  | 4                | Reverse     | 12      | 3,876     | 58.8-59.2 | 59.1  | 2,145      | 63.8-67.5  | 66.7  |      |
| 25       | 17                | 936214-6448157    | 5,511,944  | 17               | Forward     | 12      | 938       | 11.5-33.6 | 32.7  | 1,007      | 17.7-52.8  | 39.6  |      |
| 26       | 16                | 1-5281402         | 5,281,402  | 16               | Forward     | 11      | 743       | 0.0-20.8  | 1.3   | 920        | 0.0-25.2   | 9.5   |      |
| 27       | Un                | 1-5105261         | 5,105,261  | 17               | Reverse     | 11      | 2,806     | 33.4-34.3 | 34.2  | 329        | 52.7-53.8  | 53.6  |      |
| 28       | 4                 | 17820057-22730828 | 4,910,772  | 4                | Reverse     | 10      | 3,585     | 59.2-60.7 | 59.3  | 2,177      | 67.3-71.1  | 68.5  |      |
| 29       | 18                | 1-4822594         | 4,822,594  | 18               | Forward     | 10      | 738       | 0.0-17.1  | 17.1  | 816        | 0.0-28.5   | 28.5  |      |
| 30       | 1                 | 1545350-5934397   | 4,389,048  | 1                | Forward     | 9       | 654       | 18.8-46.4 | 45    | 928        | 20.9-52.3  | 49.2  |      |
| 31       | 9                 | 1-4308199         | 4,308,199  | 9                | Forward     | 9       | 558       | 0.0-20.3  | 20.3  | 644        | 0.0-35.4   | 35.2  |      |
| 32       | 18                | 12229021-15990693 | 3,761,673  | 18               | Forward     | 8       | 711       | 30.8-64.0 | 45.6  | 775        | 44.5-81.3  | 81.3  |      |
| 33       | 3                 | 1-3268600         | 3,268,600  | 3                | Forward     | 7       | 488       | 0.0-13.1  | 0     | 543        | 0.0-22.3   | 22.3  |      |
| 34       | 19                | 530650-3823253    | 3,292,604  | 19               | Forward     | 7       | 561       | 10.3-41.6 | 41.6  | 598        | 11.7-55.4  | 19.1  |      |
| 35       | 6                 | 885756-4056779    | 3,171,024  | 6                | Reverse     | 7       | 359       | 2.8-8.5   | 3     | 551        | 12.3-21.8  | 17.6  |      |
| 36       | 8                 | 1371557-4500840   | 3,129,284  | 8                | Forward     | 7       | 599       | 6.6-22.3  | 18.6  | 730        | 7.4-28.5   | 22.9  |      |
| 37       | Un                | 5106262-7754674   | 2,648,413  | 21               | Forward     | 6       | 1,721     | 11.7-12.0 | 11.8  | 1,187      | 10.1-12.6  | 11.5  |      |
| 38       | 5                 | 7878690-10536132  | 2,657,443  | 5                | Forward     | 6       | 376       | 22.8-38.3 | 28.9  | 558        | 29.0-50.0  | 34.7  |      |

|    |    |                   |           |    |         |   |     |           |      |     |             |       |
|----|----|-------------------|-----------|----|---------|---|-----|-----------|------|-----|-------------|-------|
| 39 | 7  | 2199899-4608158   | 2,408,260 | 7  | Forward | 5 | 360 | 25.5-43.7 | 27.7 | 513 | 37.1-61.8   | 37.1  |
| 40 | 14 | 13083936-15246461 | 2,162,526 | 14 | Reverse | 5 | 303 | 66.5-68.9 | 66.5 | 359 | 64.6-68.9   | 65    |
| 41 | 4  | 30452784-32632948 | 2,180,165 | 4  | Forward | 5 | 407 | 70.6-89.2 | 70.6 | 559 | 86.4-101.2  | 92.9  |
| 42 | 4  | 28356688-30451783 | 2,095,096 | 4  | Forward | 5 | 282 | 61.0-69.0 | 61   | 262 | 72.8-79.8   | 79.8  |
| 43 | 21 | 9495733-11398568  | 1,902,836 | 21 | Forward | 4 | 380 | 27.2-42.2 | 35.6 | 465 | 31.6-47.2   | 36.5  |
| 44 | 16 | 16169748-18115788 | 1,946,041 | 16 | Reverse | 4 | 698 | 56.0-59.4 | 56   | 785 | 58.7-78.3   | 78.3  |
| 45 | 15 | 14380836-16189872 | 1,809,037 | 15 | Reverse | 4 | 280 | 65.0-67.4 | 65.1 | 256 | 70.3-80.4   | 77.5  |
| 46 | 20 | 17951837-19732071 | 1,780,235 | 20 | Forward | 4 | 188 | 74.6-77.0 | 76.5 | 262 | 92.1-94.6   | 92.1  |
| 47 | Un | 7755675-9503854   | 1,748,180 | 7  | Reverse | 4 | 886 | 48.7-48.8 | 48.8 | 578 | 69.4-69.7   | 69.2  |
| 48 | Un | 9504855-11243840  | 1,738,986 | 5  | Forward | 4 | 222 | 1.5-6.0   | 1.5  | 354 | 3.8-12.3    | 9.2   |
| 49 | 11 | 621153-2204539    | 1,583,387 | 11 | Reverse | 4 | 212 | 0.9-1.5   | 0.9  | 204 | 3.0-6.8     | 4.8   |
| 50 | 3  | 15275813-16798506 | 1,522,694 | 3  | Forward | 4 | 173 | 51.6-72.9 | 51.6 | 268 | 63.4-76.8   | 63.4  |
| 51 | 13 | 1-1474264         | 1,474,264 | 13 | Reverse | 3 | 215 | 0.0-0.5   | 0.4  | 249 | 0.0-4.3     | 4.3   |
| 52 | 13 | 1475265-2824157   | 1,348,893 | 13 | Forward | 3 | 197 | 0.7-2.4   | 0.7  | 214 | 4.9-10.3    | 10.3  |
| 53 | 8  | 1-1370556         | 1,370,556 | 8  | Forward | 3 | 170 | 4.6-5.5   | 5    | 216 | 2.4-6.5     | 2.4   |
| 54 | Un | 11244841-12457396 | 1,212,556 | 5  | Forward | 3 | 127 | 0.0-0.6   | 0.6  | 160 | 0.0-2.0     | 2     |
| 55 | 7  | 928259-2198898    | 1,270,640 | 7  | Forward | 3 | 146 | 13.9-22.9 | 13.9 | 221 | 32.6-35.4   | 35.4  |
| 56 | Un | 12458397-13627317 | 1,168,921 | 8  | Forward | 3 | 140 | 0.0-3.5   | 3.5  | 141 | 0.0-0.3     | 0     |
| 57 | 13 | 18482172-19650590 | 1,168,419 | 13 | Reverse | 3 | 198 | 46.9-55.4 | 51.2 | 255 | 60.9-69.6   | 65.9  |
| 58 | Un | 13628318-14738452 | 1,110,135 | 10 | Reverse | 3 | 58  | 2.0-2.9   | 2    | 46  | 3.5         | NA    |
| 59 | 10 | 14542210-15657440 | 1,115,231 | 10 | Forward | 3 | 145 | 63.4-65.2 | 65.2 | 171 | 83.0-85.7   | 85.7  |
| 60 | 12 | 17290519-18401067 | 1,110,549 | 12 | Reverse | 3 | 156 | 70.0-75.2 | 75.2 | 161 | 84.1-88.5   | 87    |
| 61 | Un | 14739453-15741363 | 1,001,911 | 6  | Reverse | 3 | 86  | 0.0-1.2   | 1.2  | 91  | 0.0-3.8     | 0     |
| 62 | 12 | 181397-1246382    | 1,064,986 | 12 | Forward | 3 | 192 | 17.8-26.3 | 17.8 | 173 | 19.9-33.1   | 33.1  |
| 63 | 2  | 1-965607          | 965,607   | 2  | Reverse | 2 | 208 | 0.2-0.8   | 0.2  | 126 | 1.6-2.6     | 2.6   |
| 64 | 12 | 1247383-2208411   | 961,029   | 12 | Forward | 2 | 181 | 41.4-43.7 | 43.7 | 159 | 49.2-50.6   | 50.6  |
| 65 | 4  | 1-1068876         | 1,068,876 | 4  | Forward | 3 | 130 | 0.0-2.8   | 2.8  | 129 | 0.0-3.6     | 3.6   |
| 66 | 6  | 1-884755          | 884,755   | 6  | Reverse | 2 | 137 | 1.7-2.6   | 1.7  | 187 | 6.8-10.9    | 6.8   |
| 67 | Un | 15742364-16635733 | 893,370   | 21 | Forward | 2 | 193 | 47.5-53.9 | 53.9 | 286 | 66          | 66    |
| 68 | Un | 16636734-17505905 | 869,172   | 12 | Forward | 2 | 156 | 37.7-40.3 | 37.7 | 150 | 45.6-47.8   | 45.6  |
| 69 | Un | 17506906-18320481 | 813,576   | 16 | Reverse | 2 | 59  | 68.5-68.8 | 68.5 | 48  | 89.4-89.6   | 89.4  |
| 70 | 12 | 16548615-17289518 | 740,904   | 12 | Reverse | 2 | 104 | 67.8-68.8 | 67.8 | 51  | 80.0-81.3   | 80    |
| 71 | 8  | 18122349-18945509 | 823,161   | 8  | Forward | 2 | 162 | 68.4-71.1 | 68.4 | 150 | 83.9-86.9   | 83.9  |
| 72 | 15 | 342542-1069868    | 727,327   | 15 | Reverse | 2 | 119 | 7.4-13.7  | 7.4  | 173 | 9.0-12.5    | 12.5  |
| 73 | 5  | 10998358-11741737 | 743,380   | 5  | Reverse | 2 | 137 | 48.9-53.9 | 48.9 | 228 | 65.3-70.9   | 70.9  |
| 74 | Un | 18321482-19003903 | 682,422   | 1  | Forward | 2 | 134 | 83.5      | 83.5 | 160 | 111.6-112.8 | 111.6 |
| 75 | 11 | 1-620152          | 620,152   | 11 | Forward | 2 | 71  | 0.8-1.3   | 1.3  | 88  | 1.7-2.4     | 1.7   |
| 76 | Un | 19004904-19601078 | 596,175   | 6  | Reverse | 2 | 36  | 2.9-3.4   | 2.9  | 12  | NA          | NA    |
| 77 | 9  | 17895191-18499799 | 604,609   | 9  | Forward | 2 | 118 | 54.1-56.7 | 56.7 | 151 | 72.7-76.6   | 76.6  |
| 78 | 3  | 14098027-14736947 | 638,921   | 3  | Forward | 2 | 100 | 34.0-34.9 | 34.9 | 124 | 44.1-46.2   | 44.1  |
| 79 | 11 | 15152914-15736674 | 583,761   | 11 | Reverse | 2 | 120 | 49.4-53.4 | 49.4 | 166 | 67.1-70.3   | 67.1  |
| 80 | Un | 19602079-20193314 | 591,236   | 11 | Forward | 2 | 62  | 0.0-0.2   | 0.2  | 44  | 0.0-0.8     | 0     |
| 81 | 3  | 14737948-15274812 | 536,865   | 3  | Forward | 2 | 119 | 42.5-45.1 | 42.5 | 98  | 53.2-57.6   | NA    |
| 82 | 1  | 27586784-28185914 | 599,131   | 1  | Reverse | 2 | 78  | 94.3-95.6 | 94.3 | 75  | 121.1-121.5 | 121.5 |
| 83 | 1  | 1-540082          | 540,082   | 1  | Reverse | 2 | 39  | 0.0-0.7   | 0    | 63  | 0.0-0.1     | 0.3   |
| 84 | Un | 20194315-20757747 | 563,433   | 15 | Forward | 2 | 32  | 67.7-68.4 | 67.7 | 51  | 81.7-82.7   | 81.7  |
| 85 | 19 | 1-529649          | 529,649   | 19 | Forward | 2 | 60  | 0.0-1.4   | 0    | 95  | 0.0-0.8     | 0     |

|     |    |                   |         |    |         |   |     |             |       |     |             |       |
|-----|----|-------------------|---------|----|---------|---|-----|-------------|-------|-----|-------------|-------|
| 86  | 7  | 1-539725          | 539,725 | 7  | Reverse | 2 | 69  | 2.6-3.6     | 3.6   | 76  | 11.5-13.3   | 13.3  |
| 87  | 9  | 19745084-20249479 | 504,396 | 9  | Reverse | 2 | 51  | 76.3-76.9   | 76.3  | 70  | 100.0-103.2 | 100   |
| 88  | Un | 20758748-21267600 | 508,853 | 14 | Reverse | 2 | 51  | 69.6        | 68.3  | 52  | 72.2-73.0   | 72.2  |
| 89  | Un | 21268601-21812334 | 543,734 | 17 | Forward | 2 | 26  | 0.0-0.3     | 0     | 56  | 0           | 0     |
| 90  | Un | 21813335-22322408 | 509,074 | 4  | Reverse | 2 | 14  | 107.3       | 107.3 | 19  | 133.0-135.4 | 133   |
| 91  | 9  | 18500800-19031248 | 530,449 | 9  | Reverse | 2 | 76  | 59.6-61.9   | 59.6  | 85  | 79.2-81.8   | 79.2  |
| 92  | 1  | 541083-1048102    | 507,020 | 1  | Forward | 2 | 76  | 1.4-2.9     | 2.9   | 111 | 0.5-0.9     | 0.3   |
| 93  | 5  | 10537133-10997357 | 460,225 | 5  | Reverse | 2 | 63  | 41.2-43.8   | 43.8  | 105 | 54.3-57.0   | 54.3  |
| 94  | Un | 22323409-22840795 | 517,387 | 21 | Unknown | 2 | 9   | 0           | 0     | 5   | NA          | 10.1  |
| 95  | Un | 22841796-23342223 | 500,428 | 21 | Forward | 2 | 52  | 5.6-7.1     | 7.1   | 56  | 0           | 0     |
| 96  | 2  | 22376857-22828185 | 451,329 | 2  | Reverse | 2 | 36  | 79.8-79.9   | 79.8  | 24  | 95.0-95.6   | 95.6  |
| 97  | 1  | 1049103-1544349   | 495,247 | 1  | Forward | 2 | 72  | 5.2-6.6     | 6.6   | 94  | 3.6-5.3     | 5.3   |
| 98  | Un | 23343224-23754800 | 411,577 | 2  | Reverse | 2 | 43  | 0.0-0.4     | 0     | 55  | 0.0-0.4     | 0     |
| 99  | Un | 23755801-24176448 | 420,648 | 12 | Reverse | 2 | 66  | 28.2-29.6   | 29.6  | 106 | 37.6-40.1   | 37.6  |
| 100 | 11 | 16133022-16562300 | 429,279 | 11 | Reverse | 2 | 58  | 61.5-62.6   | 62.6  | 56  | 81.1-82.2   | 82.2  |
| 101 | Un | 24177449-24562071 | 384,623 | 10 | Reverse | 2 | 22  | 2.0-2.6     | 2.6   | 23  | NA          | 1.8   |
| 102 | 2  | 22829186-23295652 | 466,467 | 2  | Forward | 2 | 69  | 78.2-79.7   | 79.7  | 77  | 94.4-95.3   | 95.3  |
| 103 | 11 | 15737675-16132021 | 394,347 | 11 | Reverse | 2 | 65  | 64.2-64.8   | 64.8  | 17  | 78.6        | 78.6  |
| 104 | 20 | 1-415733          | 415,733 | 20 | Forward | 2 | 99  | 8.9-9.4     | 8.9   | 61  | 5.2-6.0     | 6     |
| 105 | 9  | 19032249-19485083 | 452,835 | 9  | Forward | 2 | 48  | 63.7-64.6   | 63.7  | 76  | 85.1-86.9   | 86.9  |
| 106 | Un | 24563072-24936439 | 373,368 | 7  | Forward | 2 | 77  | 48.7-48.8   | 48.7  | 10  | 69.2-69.8   | 69.2  |
| 107 | 13 | 19651591-20070501 | 418,911 | 13 | Reverse | 2 | 37  | 66.6-68.0   | 68    | 59  | 76.2-79.0   | 79    |
| 108 | Un | 24937440-25286697 | 349,258 | 4  | Reverse | 2 | 16  | 58.7        | 59.1  | 36  | 67.4        | 67.4  |
| 109 | 17 | 1-409613          | 409,613 | 17 | Reverse | 2 | 110 | 0.6-2.0     | 2     | 93  | 1.8-3.0     | 3     |
| 110 | 15 | 1-341541          | 341,541 | 15 | Reverse | 2 | 33  | 0.0-0.3     | 0     | 42  | 0.0-3.6     | 0     |
| 111 | Un | 25287698-25631573 | 343,876 | 10 | Forward | 2 | 40  | 2.0-2.3     | 2     | 61  | 0.0-0.8     | 0.8   |
| 112 | Un | 25632574-25990228 | 357,655 | 5  | Reverse | 2 | 52  | 57.0-57.8   | 57    | 77  | 74.5-76.0   | 74.5  |
| 113 | 7  | 27614547-27937443 | 322,897 | 7  | Forward | 2 | 31  | 97.5-97.9   | 97.5  | 42  | 129.8       | 129.8 |
| 114 | Un | 25991229-26360520 | 369,292 | 12 | Forward | 2 | 34  | 0.0-0.5     | 0.5   | 47  | 0.0-1.1     | 1.1   |
| 115 | Un | 26361521-26705539 | 344,019 | 16 | Reverse | 2 | 47  | 62.4-66.3   | 62.4  | 78  | 84.0-85.3   | 85.3  |
| 116 | 14 | 1-345721          | 345,721 | 14 | Reverse | 2 | 19  | 0.0-0.4     | 0     | 47  | 1.4-2.0     | 1.4   |
| 117 | 6  | 16660651-17083675 | 423,025 | 6  | Forward | 2 | 14  | 60.8        | 60.5  | 31  | 82.2-83.0   | 83    |
| 118 | 7  | 540726-927258     | 386,533 | 7  | Forward | 2 | 47  | 5.1-8.2     | 5.1   | 56  | 15.4-18.2   | 18.2  |
| 119 | Un | 26706540-26996700 | 290,161 | 1  | Forward | 2 | 69  | 52.9-53.4   | 53.4  | 13  | 74.5        | 73.8  |
| 120 | Un | 26997701-27300803 | 303,103 | 3  | Reverse | 2 | 38  | 77.3-77.9   | 77.9  | 44  | 81.7-82.5   | 81.7  |
| 121 | Un | 27301804-27693698 | 391,895 | 4  | Reverse | 2 | 57  | 103.3-105.0 | 103.3 | 38  | 124.3-125.9 | 124.3 |
| 122 | Un | 27694699-27999486 | 304,788 | 20 | Forward | 2 | 67  | 11.1-12.8   | 11.1  | 65  | 9.3-13.3    | 9.3   |
| 123 | 1  | 27291229-27585783 | 294,555 | 1  | Unknown | 2 | 5   | 97.6        | 97.6  | 6   | 122.8       | 122.8 |
| 124 | 18 | 15991694-16282716 | 291,023 | 18 | Unknown | 2 | 5   | NA          | 64    | 1   | NA          | 81.3  |
| 125 | 5  | 11954056-12251397 | 297,342 | 5  | Reverse | 2 | 15  | 58.0-59.6   | 58.7  | 38  | 76.5-77.6   | 76.5  |
| 126 | Un | 28000487-28291363 | 290,877 | 21 | Forward | 2 | 43  | 63.3-64.0   | 63.3  | 43  | 76.3        | 76.3  |
| 127 | 21 | 11399569-11666335 | 266,767 | 21 | Forward | 2 | 40  | 59.7-62.2   | 62.2  | 49  | 73.7        | 73.7  |
| 128 | Un | 28292364-28543617 | 251,254 | 15 | Reverse | 2 | 30  | 64.6-65.2   | 64.7  | 5   | NA          | 71.1  |
| 129 | Un | 28544618-28819305 | 274,688 | 7  | Reverse | 2 | 38  | 0.7-1.1     | 1.1   | 9   | 0.0-1.1     | 0     |
| 130 | Un | 28820306-29056818 | 236,513 | 10 | Reverse | 2 | 56  | 1.8-2.5     | 2.6   | 51  | 1.4-1.8     | 1.8   |
| 131 | Un | 29057819-29310115 | 252,297 | 7  | Forward | 2 | 26  | 0.0-1.5     | 1.5   | 25  | 8.8-9.6     | 9.6   |
| 132 | Un | 29311116-29570536 | 259,421 | 7  | Forward | 2 | 28  | 97.0-97.5   | 97    | 43  | 130.9       | 130.9 |

|     |    |                   |         |       |         |   |     |           |       |     |             |       |
|-----|----|-------------------|---------|-------|---------|---|-----|-----------|-------|-----|-------------|-------|
| 133 | Un | 29571537-29837943 | 266,407 | 13    | Unknown | 2 | 15  | 64.8      | 64.3  | 5   | 81.1        | 81.1  |
| 134 | Un | 29838944-30096081 | 257,138 | 21    | Unknown | 2 | 6   | NA        | NA    | 6   | 1.9         | 1.9   |
| 135 | Un | 30097082-30343148 | 246,067 | 3     | Reverse | 2 | 21  | 75.0-75.8 | 75    | 35  | 80.7-86.4   | 86.4  |
| 136 | 17 | 410614-641510     | 230,897 | 17    | Reverse | 2 | 28  | 3.0-3.5   | 3.5   | 39  | 5           | NA    |
| 137 | Un | 30344149-30593893 | 249,745 | 20    | Forward | 2 | 37  | 0.0-10.4  | 10.4  | 23  | 0.0-7.0     | 7     |
| 138 | 8  | 19133478-19368704 | 235,227 | 8     | Reverse | 2 | 20  | 73.2      | 73.2  | 49  | 89.2-89.3   | 89.2  |
| 139 | Un | 30594894-30817804 | 222,911 | 12    | Reverse | 2 | 19  | 1.9-3.4   | 3.4   | 29  | 0.9-1.7     | 1.7   |
| 140 | 6  | 16418535-16659650 | 241,116 | 6     | Unknown | 2 | 25  | 60.1      | 60.5  | 43  | 81.1        | 81.1  |
| 141 | Un | 30818805-31038364 | 219,560 | 12    | Unknown | 2 | 1   | NA        | 1.9   | 2   | NA          | 0.9   |
| 142 | 5  | 11742738-11953055 | 210,318 | 5     | Forward | 2 | 24  | 58.4-58.7 | 58.7  | 24  | 76.5-77.0   | 76.5  |
| 143 | 20 | 593103-833141     | 240,039 | 20    | Forward | 2 | 33  | 15.2-17.6 | 15.2  | 37  | 21.1        | 21.1  |
| 144 | 21 | 1-297070          | 297,070 | 21    | Unknown | 2 | 4   | 8.9       | 8.9   | 6   | 2.7         | 2.7   |
| 145 | Un | 31039365-31334864 | 295,500 | 21    | Unknown | 2 | 1   | NA        | 5.6   | 1   | NA          | 1.9   |
| 146 | Un | 31335865-31560395 | 224,531 | 21    | Reverse | 2 | 13  | 69        | 67.7  | 21  | 77.4-77.6   | 77.4  |
| 147 | Un | 31561396-31777177 | 215,782 | 21    | Unknown | 2 | 5   | 8.5       | 8.5   | 2   | NA          | 10.1  |
| 148 | Un | 31778178-31975086 | 196,909 | 12    | Forward | 2 | 21  | 76.0-76.9 | 76.9  | 28  | 91.6-94.3   | 91.6  |
| 149 | Un | 31976087-32163437 | 187,351 | 10    | Forward | 2 | 159 | 62.0-62.9 | 62.2  | 152 | 84.1-84.2   | 84.3  |
| 150 | Un | 32164438-32354918 | 190,481 | 13    | Reverse | 2 | 17  | 65.8-65.9 | 65.8  | 32  | 80.0-80.4   | 80    |
| 151 | Un | 32355919-32547295 | 191,377 | 11    | Forward | 2 | 25  | 44.2      | 44.2  | 61  | 63.5-65.3   | 65.3  |
| 152 | Un | 32548296-32814531 | 266,236 | 4     | Reverse | 2 | 38  | 106.7     | 106.7 | 38  | 127.4-128.2 | 127.4 |
| 153 | 8  | 18946510-19132477 | 185,968 | 8     | Reverse | 2 | 1   | NA        | 73.2  | 57  | 89.7-91.0   | 89.7  |
| 155 | Un | 33000773-33191444 | 190,672 | 21    | Unknown | 2 | 5   | NA        | 11.8  | 0   | NA          | NA    |
| 156 | Un | 33192445-33362665 | 170,221 | 6     | Forward | 2 | 19  | 60.5-61.0 | 60.5  | 13  | 83.7        | 83.7  |
| 157 | Un | 33363666-33534841 | 171,176 | 20    | Forward | 2 | 21  | 9.2-9.7   | 9.2   | 19  | 1.1-5.5     | 0     |
| 158 | 12 | 1-180396          | 180,396 | 12    | Forward | 2 | 36  | 11.4-12.8 | 12.8  | 54  | 10.4        | NA    |
| 159 | Un | 33535842-33702692 | 166,851 | 15    | Forward | 2 | 24  | 2.8       | 2.8   | 16  | 5.0-5.3     | 5     |
| 160 | Un | 33703693-33861776 | 158,084 | 16/10 | Unknown | 2 | 7   | NA        | 59.4  | 6   | NA          | 0.8   |
| 161 | Un | 33862777-34020958 | 158,182 | 3     | Forward | 2 | 15  | 78.3-78.9 | 78.9  | 6   | NA          | 86.4  |
| 162 | Un | 34021959-34197025 | 175,067 | 21    | Unknown | 2 | 5   | NA        | 7.1   | 0   | NA          | NA    |
| 163 | Un | 34198026-34359936 | 161,911 | 19    | Reverse | 2 | 37  | 2.9       | 2.9   | 48  | 3.3-5.2     | 3.3   |
| 164 | Un | 34360937-34619011 | 258,075 | 21    | Unknown | 2 | 1   | NA        | 5.6   | 0   | NA          | NA    |
| 165 | Un | 34620012-34788385 | 168,374 | 1     | Forward | 2 | 34  | 11.1-12.5 | 11.1  | 25  | 12.1-16.5   | 16.5  |
| 167 | Un | 34987570-35142483 | 154,914 | 11    | Unknown | 2 | 9   | 0.4       | 0.4   | 1   | NA          | NA    |
| 168 | Un | 35143484-35297961 | 154,478 | 14    | Reverse | 2 | 36  | 2.6-3.7   | 2.6   | 21  | 3.1-3.7     | 3.1   |
| 169 | Un | 35298962-35453231 | 154,270 | 3     | Forward | 2 | 20  | 39.0-40.3 | 40.3  | 36  | 52          | 52    |
| 170 | 20 | 416734-592102     | 175,369 | 20    | Forward | 2 | 21  | 7.8-8.3   | 7.8   | 36  | 5.7-5.8     | 5.8   |
| 171 | Un | 35454232-35640608 | 186,377 | 9     | Unknown | 2 | 7   | NA        | 59.6  | 3   | NA          | 79.2  |
| 173 | Un | 35817148-36026950 | 209,803 | 9     | Unknown | 2 | 7   | NA        | 69.4  | 9   | NA          | 94.7  |
| 174 | 17 | 766878-935213     | 168,336 | 17    | Forward | 2 | 20  | 5.0-5.6   | 5.6   | 25  | 9.9         | 9.9   |
| 175 | Un | 36027951-36199373 | 171,423 | 1     | Forward | 2 | 25  | 9.4-10.5  | 10.5  | 44  | 8.6-9.4     | 8.6   |
| 176 | Un | 36200374-36342913 | 142,540 | 14    | Unknown | 2 | 5   | NA        | 0     | 7   | 0           | 0     |
| 177 | Un | 36343914-36492910 | 148,997 | 9     | Forward | 2 | 29  | 71.7-72.1 | 72.1  | 30  | 96.8-98.8   | 98.8  |
| 180 | Un | 36787135-36924936 | 137,802 | 12    | Unknown | 2 | 12  | 6.1       | 6.1   | 15  | 5.7         | 5.7   |
| 181 | Un | 36925937-37061398 | 135,462 | 16    | Forward | 2 | 23  | 67.2-67.8 | 67.8  | 31  | 87.8        | 86.5  |
| 182 | Un | 37062399-37196909 | 134,511 | 21    | Reverse | 2 | 8   | 67.7      | 67.7  | 13  | 78.2-79.1   | 79.1  |
| 183 | 9  | 19486084-19607294 | 121,211 | 9     | Reverse | 2 | 37  | 65.8-66.3 | 65.8  | 26  | 88.9-90.0   | 88.9  |
| 184 | Un | 37197910-37345605 | 147,696 | 15    | Reverse | 2 | 51  | 3.8-4.2   | 4.2   | 40  | 6.2-6.5     | 6.5   |

a



|     |    |                   |         |    |         |   |    |           |       |    |            |       |
|-----|----|-------------------|---------|----|---------|---|----|-----------|-------|----|------------|-------|
| 185 | Un | 37346606-37498022 | 151,417 | 7  | Unknown | 2 | 8  | NA        | 13.9  | 0  | NA         | NA    |
| 186 | Un | 37499023-37637380 | 138,358 | 1  | Unknown | 2 | 3  | NA        | 0     | 10 | 0.3        | 0.3   |
| 188 | Un | 37754495-37875713 | 121,219 | 21 | Unknown | 2 | 1  | NA        | NA    | 4  | NA         | 10.1  |
| 189 | 9  | 19627166-19744083 | 116,918 | 9  | Forward | 2 | 25 | 69.4      | 74.6  | 15 | 92.7-101.2 | 100   |
| 190 | 11 | 16563301-16706052 | 142,752 | 11 | Unknown | 2 | 6  | 62.8      | 62.6  | 11 | 84.1       | 78.6  |
| 191 | 17 | 642511-765877     | 123,367 | 17 | Unknown | 2 | 14 | 4.2       | 4.2   | 18 | 5.7        | 5.7   |
| 193 | Un | 38013290-38114339 | 101,050 | 7  | Unknown | 2 | 3  | NA        | 8.2   | 1  | NA         | NA    |
| 194 | Un | 38115340-38232624 | 117,285 | 21 | Unknown | 2 | 1  | NA        | 0     | 0  | NA         | NA    |
| 195 | Un | 38233625-38380945 | 147,321 | 12 | Reverse | 2 | 19 | 5.3-6.5   | 6.5   | 24 | 3          | 3     |
| 196 | Un | 38381946-38480572 | 98,627  | 14 | Unknown | 1 | 12 | NA        | 0     | 15 | NA         | 2     |
| 197 | Un | 38481573-38597001 | 115,429 | 14 | Forward | 2 | 10 | 0.7-0.9   | 0.9   | 19 | 2.4        | 2.4   |
| 198 | Un | 38598002-38706708 | 108,707 | 9  | Unknown | 2 | 3  | NA        | NA    | 7  | 94.7       | 94.7  |
| 199 | Un | 38707709-38805661 | 97,953  | 4  | Unknown | 1 | 20 | NA        | 89.2  | 9  | NA         | NA    |
| 200 | Un | 38806662-38907936 | 101,275 | 13 | Unknown | 2 | 6  | 65.5      | 65.5  | 8  | 79.6       | 79    |
| 201 | Un | 38908937-39051539 | 142,603 | 3  | Unknown | 2 | 2  | NA        | 51.6  | 5  | 61         | 61    |
| 202 | Un | 39052540-39162288 | 109,749 | 16 | Reverse | 2 | 13 | 70.8      | 67.8  | 12 | 86.5-87.4  | 87.4  |
| 203 | Un | 39163289-39271365 | 108,077 | 21 | Unknown | 2 | 0  | NA        | NA    | 2  | NA         | 10.1  |
| 204 | Un | 39272366-39363831 | 91,466  | 1  | Unknown | 1 | 17 | NA        | 5.2   | 14 | NA         | 0.3   |
| 205 | Un | 39364832-39491281 | 126,450 | 9  | Unknown | 2 | 6  | NA        | 66.3  | 4  | NA         | NA    |
| 206 | Un | 39492282-39591840 | 99,559  | 4  | Unknown | 1 | 20 | NA        | 103.3 | 21 | NA         | NA    |
| 208 | Un | 39711137-39820485 | 109,349 | 10 | Reverse | 2 | 63 | 61.0-62.5 | 61    | 52 | 84.4-85.1  | 85.1  |
| 210 | Un | 39910623-39994605 | 83,983  | 1  | Unknown | 1 | 6  | NA        | 95.6  | 7  | NA         | 121.1 |
| 211 | Un | 39995606-40077297 | 81,692  | 8  | Unknown | 1 | 18 | NA        | 71.1  | 14 | NA         | NA    |
| 213 | Un | 40165280-40250677 | 85,398  | 21 | Unknown | 1 | 9  | NA        | 64    | 11 | NA         | 77.4  |
| 214 | Un | 40251678-40339421 | 87,744  | 21 | Unknown | 1 | 6  | NA        | 64    | 10 | NA         | 77.4  |
| 215 | Un | 40340422-40434995 | 94,574  | 21 | Unknown | 1 | 1  | NA        | 8.9   | 0  | NA         | NA    |
| 216 | Un | 40435996-40530711 | 94,716  | 6  | Unknown | 1 | 12 | NA        | 60.1  | 18 | NA         | 74.4  |
| 217 | Un | 40531712-40613024 | 81,313  | 21 | Unknown | 1 | 2  | NA        | 11.5  | 0  | NA         | NA    |
| 218 | Un | 40614025-40703418 | 89,394  | 8  | Unknown | 1 | 13 | NA        | 71.1  | 19 | NA         | 89.2  |
| 219 | Un | 40704419-40783668 | 79,250  | 3  | Unknown | 1 | 5  | NA        | 75    | 13 | NA         | NA    |
| 220 | Un | 40784669-40904766 | 120,098 | 13 | Unknown | 2 | 10 | 64.3      | 64.3  | 1  | NA         | 79    |
| 221 | Un | 40905767-40979726 | 73,960  | 4  | Unknown | 1 | 3  | NA        | 58.1  | 6  | NA         | 67.5  |
| 222 | 4  | 1069877-1173334   | 103,458 | 4  | Unknown | 2 | 14 | 4.2       | 4.2   | 20 | 6          | 6     |
| 224 | Un | 41062695-41270847 | 208,153 | 19 | Unknown | 2 | 0  | NA        | NA    | 3  | 47.9       | 47.9  |
| 225 | Un | 41271848-41362991 | 91,144  | 13 | Unknown | 1 | 4  | NA        | 65.8  | 13 | NA         | 80    |
| 227 | Un | 41490409-41590171 | 99,763  | 21 | Unknown | 1 | 1  | NA        | 8.5   | 2  | NA         | NA    |
| 229 | Un | 41659832-41725083 | 65,252  | 20 | Unknown | 1 | 11 | NA        | 11.1  | 8  | NA         | 9.3   |
| 231 | Un | 41794577-41866531 | 71,955  | 4  | Unknown | 1 | 2  | NA        | 107.3 | 5  | NA         | 127.4 |
| 232 | Un | 41867532-42039735 | 172,204 | 9  | Unknown | 2 | 2  | NA        | 66.3  | 0  | NA         | NA    |
| 234 | Un | 42115228-42185738 | 70,511  | 21 | Unknown | 1 | 2  | NA        | 11.8  | 0  | NA         | NA    |
| 235 | Un | 42186739-42250670 | 63,932  | 2  | Unknown | 1 | 10 | NA        | 78.2  | 19 | NA         | 94.4  |
| 237 | Un | 42315881-42383608 | 67,728  | 12 | Unknown | 1 | 3  | NA        | 0     | 5  | NA         | 1.7   |
| 238 | Un | 42384609-42446850 | 62,242  | 9  | Unknown | 1 | 7  | NA        | 71.7  | 17 | NA         | 94.7  |
| 239 | Un | 42447851-42509289 | 61,439  | 12 | Unknown | 1 | 10 | NA        | 12.8  | 12 | NA         | NA    |
| 240 | Un | 42510290-42576502 | 66,213  | 16 | Unknown | 1 | 5  | NA        | 68.5  | 10 | NA         | 89.4  |
| 242 | Un | 42638668-42734078 | 95,411  | 21 | Unknown | 1 | 0  | NA        | NA    | 1  | NA         | 1.9   |
| 243 | Un | 42735079-42812442 | 77,364  | 13 | Unknown | 1 | 9  | NA        | 0     | 9  | NA         | NA    |

|     |    |                   |         |       |         |   |    |      |       |    |       |       |
|-----|----|-------------------|---------|-------|---------|---|----|------|-------|----|-------|-------|
| 244 | Un | 42813443-42915923 | 102,481 | 9     | Unknown | 2 | 7  | 74.6 | 74.6  | 15 | 100.3 | 100   |
| 246 | Un | 42979616-43037963 | 58,348  | 10    | Unknown | 1 | 86 | NA   | 62.5  | 82 | NA    | 84.1  |
| 247 | Un | 43038964-43093304 | 54,341  | 15    | Unknown | 1 | 12 | NA   | 0.3   | 3  | NA    | NA    |
| 248 | Un | 43094305-43149449 | 55,145  | 16    | Unknown | 1 | 0  | NA   | NA    | 4  | NA    | 46.8  |
| 249 | Un | 43150450-43208946 | 58,497  | 15    | Unknown | 1 | 2  | NA   | 0.3   | 7  | NA    | 0     |
| 251 | Un | 43283583-43336528 | 52,946  | 9     | Unknown | 1 | 1  | NA   | 69.4  | 0  | NA    | NA    |
| 253 | Un | 43389470-43454658 | 65,189  | 11    | Unknown | 1 | 2  | NA   | 11.4  | 2  | NA    | NA    |
| 256 | Un | 43622280-43680027 | 57,748  | 5     | Unknown | 1 | 0  | NA   | NA    | 1  | NA    | 12.9  |
| 257 | 21 | 11667336-11717487 | 50,152  | 21    | Unknown | 1 | 2  | NA   | 67.7  | 0  | NA    | NA    |
| 259 | Un | 43742337-43835441 | 93,105  | 1     | Unknown | 1 | 5  | NA   | 83.5  | 12 | NA    | NA    |
| 260 | Un | 43836442-43892821 | 56,380  | 21    | Unknown | 1 | 1  | NA   | 11.5  | 0  | NA    | NA    |
| 261 | Un | 43893822-43948169 | 54,348  | 14    | Unknown | 1 | 2  | NA   | 6.7   | 0  | NA    | NA    |
| 265 | Un | 44137454-44209165 | 71,712  | 21    | Unknown | 1 | 0  | NA   | NA    | 2  | NA    | 1.9   |
| 266 | Un | 44210166-44266666 | 56,501  | 21    | Unknown | 1 | 1  | NA   | 7.1   | 0  | NA    | NA    |
| 267 | Un | 44267667-44325426 | 57,760  | 9     | Unknown | 1 | 3  | NA   | 64.6  | 6  | NA    | NA    |
| 268 | Un | 44326427-44386154 | 59,728  | 14    | Unknown | 1 | 1  | NA   | 0.7   | 0  | NA    | NA    |
| 269 | Un | 44387155-44431490 | 44,336  | 18    | Unknown | 1 | 4  | NA   | 64    | 2  | NA    | NA    |
| 270 | Un | 44432491-44475220 | 42,730  | 4     | Unknown | 1 | 6  | NA   | 107.3 | 2  | NA    | NA    |
| 273 | Un | 44606402-44648496 | 42,095  | 7     | Unknown | 1 | 9  | NA   | 95.1  | 15 | NA    | 130.9 |
| 276 | Un | 44736933-44778502 | 41,570  | 12    | Unknown | 1 | 13 | NA   | 11.4  | 7  | NA    | NA    |
| 277 | Un | 44779503-44820394 | 40,892  | 6     | Unknown | 1 | 5  | NA   | 60.1  | 12 | NA    | 81.1  |
| 279 | Un | 44891839-44932111 | 40,273  | 17    | Unknown | 1 | 5  | NA   | 0.3   | 15 | NA    | 0     |
| 280 | Un | 44933112-44993620 | 60,509  | 4     | Unknown | 1 | 9  | NA   | 105   | 11 | NA    | NA    |
| 281 | Un | 44994621-45063811 | 69,191  | 4     | Unknown | 1 | 10 | NA   | 106.7 | 7  | NA    | 125.9 |
| 282 | Un | 45064812-45104696 | 39,885  | 21    | Unknown | 1 | 0  | NA   | NA    | 1  | NA    | 10.1  |
| 283 | Un | 45105697-45161722 | 56,026  | 21    | Unknown | 1 | 0  | NA   | NA    | 2  | NA    | 1.9   |
| 285 | Un | 45203822-45244729 | 40,908  | 14    | Unknown | 1 | 3  | NA   | 0.9   | 1  | NA    | 2     |
| 286 | Un | 45245730-45285318 | 39,589  | 12    | Unknown | 1 | 0  | NA   | NA    | 3  | NA    | 52.4  |
| 288 | Un | 45349565-45388744 | 39,180  | 21    | Unknown | 1 | 1  | NA   | 0     | 0  | NA    | NA    |
| 291 | Un | 45511903-45550564 | 38,662  | 21    | Unknown | 1 | 2  | NA   | 7.1   | 1  | NA    | NA    |
| 293 | Un | 45590871-45642025 | 51,155  | 14    | Unknown | 1 | 3  | NA   | 0.7   | 0  | NA    | NA    |
| 294 | Un | 45643026-45696553 | 53,528  | 21    | Unknown | 1 | 1  | NA   | 8.5   | 0  | NA    | NA    |
| 296 | Un | 45736233-45794993 | 58,761  | 9     | Unknown | 1 | 18 | NA   | 64.6  | 5  | NA    | NA    |
| 299 | Un | 45870018-45905559 | 35,542  | 10    | Unknown | 1 | 2  | NA   | 44.9  | 3  | NA    | 54.7  |
| 300 | Un | 45906560-45960251 | 53,692  | 1     | Unknown | 1 | 5  | NA   | 83.5  | 6  | NA    | NA    |
| 303 | Un | 46068541-46103086 | 34,546  | 8     | Unknown | 1 | 1  | NA   | 16.3  | 0  | NA    | NA    |
| 304 | Un | 46104087-46138840 | 34,754  | 20    | Unknown | 1 | 1  | NA   | 53.2  | 0  | NA    | NA    |
| 306 | Un | 46175505-46231026 | 55,522  | 9     | Unknown | 1 | 2  | NA   | 63.7  | 2  | NA    | 86.9  |
| 307 | Un | 46232027-46266711 | 34,685  | 12    | Unknown | 1 | 5  | NA   | 6.1   | 5  | NA    | 1.7   |
| 309 | Un | 46327163-46361761 | 34,599  | 21    | Unknown | 1 | 7  | NA   | NA    | 6  | NA    | 13.4  |
| 311 | Un | 46400029-46460590 | 60,562  | 21    | Unknown | 1 | 2  | NA   | 11.8  | 0  | NA    | NA    |
| 313 | Un | 46514490-46567505 | 53,016  | 20/12 | Unknown | 1 | 1  | NA   | 52.7  | 1  | NA    | 33.1  |
| 314 | Un | 46568506-46603289 | 34,784  | 15    | Unknown | 1 | 2  | NA   | 2.8   | 7  | NA    | 3.6   |
| 316 | Un | 46638551-46670753 | 32,203  | 7     | Unknown | 1 | 1  | NA   | NA    | 1  | NA    | 0     |
| 318 | Un | 46725951-46789913 | 63,963  | 21    | Unknown | 1 | 1  | NA   | 0     | 0  | NA    | NA    |
| 321 | Un | 46876408-46971532 | 95,125  | 20    | Unknown | 1 | 1  | NA   | 11.1  | 0  | NA    | NA    |
| 323 | Un | 47006411-47059861 | 53,451  | 13    | Unknown | 1 | 2  | NA   | 64.3  | 3  | NA    | 81.1  |

b

|     |    |                   |        |    |         |   |    |    |      |    |    |       |
|-----|----|-------------------|--------|----|---------|---|----|----|------|----|----|-------|
| 324 | Un | 47060862-47091664 | 30,803 | 7  | Unknown | 1 | 2  | NA | 97.9 | 4  | NA | 130.9 |
| 326 | Un | 47124039-47177501 | 53,463 | 14 | Unknown | 1 | 0  | NA | NA   | 2  | NA | 2     |
| 327 | Un | 47178502-47208678 | 30,177 | 20 | Unknown | 1 | 5  | NA | NA   | 6  | NA | 60.3  |
| 328 | Un | 47209679-47269348 | 59,670 | 8  | Unknown | 1 | 10 | NA | 24   | 0  | NA | NA    |
| 332 | Un | 47362639-47393753 | 31,115 | 9  | Unknown | 1 | 1  | NA | 20.9 | 6  | NA | 38.9  |
| 334 | Un | 47425274-47482086 | 56,813 | 21 | Unknown | 1 | 0  | NA | NA   | 1  | NA | 10.1  |
| 338 | Un | 47611169-47662141 | 50,973 | 13 | Unknown | 1 | 2  | NA | 64.8 | 12 | NA | 79.6  |
| 339 | Un | 47663142-47722178 | 59,037 | 14 | Unknown | 1 | 4  | NA | 6.7  | 2  | NA | NA    |
| 340 | Un | 47723179-47751104 | 27,926 | 9  | Unknown | 1 | 1  | NA | 66.3 | 0  | NA | NA    |
| 342 | Un | 47804064-47866166 | 62,103 | 21 | Unknown | 1 | 1  | NA | 0    | 0  | NA | NA    |
| 343 | Un | 47867167-47895531 | 28,365 | 21 | Unknown | 1 | 8  | NA | 63.3 | 3  | NA | 77.4  |
| 346 | Un | 47959095-47985867 | 26,773 | 15 | Unknown | 1 | 1  | NA | 51.5 | 1  | NA | 52.1  |
| 349 | Un | 48070254-48096867 | 26,614 | 13 | Unknown | 1 | 9  | NA | 68   | 13 | NA | 76.2  |
| 350 | Un | 48097868-48156594 | 58,727 | 13 | Unknown | 1 | 3  | NA | NA   | 3  | NA | 40.4  |
| 351 | Un | 48157595-48184126 | 26,532 | 21 | Unknown | 1 | 0  | NA | NA   | 1  | NA | 2.7   |
| 352 | Un | 48185127-48236169 | 51,043 | 21 | Unknown | 1 | 1  | NA | 0    | 0  | NA | NA    |
| 355 | Un | 48293502-48318618 | 25,117 | 21 | Unknown | 1 | 12 | NA | 64   | 5  | NA | 77.4  |
| 357 | Un | 48366565-48391571 | 25,007 | 8  | Unknown | 1 | 0  | NA | NA   | 4  | NA | 86.9  |
| 358 | Un | 48392572-48417944 | 25,373 | 11 | Unknown | 1 | 4  | NA | 1    | 2  | NA | NA    |
| 359 | Un | 48418945-48443627 | 24,683 | 1  | Unknown | 1 | 1  | NA | 67   | 5  | NA | NA    |
| 363 | Un | 48545426-48569683 | 24,258 | 14 | Unknown | 1 | 1  | NA | 0.7  | 0  | NA | NA    |
| 365 | Un | 48595857-48620102 | 24,246 | 12 | Unknown | 1 | 1  | NA | NA   | 3  | NA | 1.1   |
| 368 | Un | 48671136-48714869 | 43,734 | 21 | Unknown | 1 | 2  | NA | 8.9  | 0  | NA | NA    |
| 369 | Un | 48715870-48740052 | 24,183 | 9  | Unknown | 1 | 5  | NA | 65.8 | 4  | NA | 92.7  |
| 370 | Un | 48741053-48764711 | 23,659 | 21 | Unknown | 1 | 1  | NA | 11.5 | 0  | NA | NA    |
| 380 | Un | 48990316-49013826 | 23,511 | 12 | Unknown | 1 | 0  | NA | NA   | 1  | NA | 0     |
| 381 | Un | 49014827-49037708 | 22,882 | 13 | Unknown | 1 | 7  | NA | 55.4 | 4  | NA | 69.6  |
| 382 | Un | 49038709-49063862 | 25,154 | 13 | Unknown | 1 | 9  | NA | 46.9 | 5  | NA | 60.9  |
| 385 | Un | 49112679-49135318 | 22,640 | 14 | Unknown | 1 | 2  | NA | 6.7  | 0  | NA | NA    |
| 387 | Un | 49159782-49207533 | 47,752 | 1  | Unknown | 1 | 1  | NA | 63.3 | 0  | NA | NA    |
| 391 | Un | 49278818-49300531 | 21,714 | 16 | Unknown | 1 | 4  | NA | 0    | 0  | NA | NA    |
| 393 | Un | 49324284-49345924 | 21,641 | 1  | Unknown | 1 | 7  | NA | 6.6  | 6  | NA | 5.3   |
| 395 | Un | 49373502-49395098 | 21,597 | 13 | Unknown | 1 | 2  | NA | 64.3 | 0  | NA | NA    |
| 396 | Un | 49396099-49418099 | 22,001 | 12 | Unknown | 1 | 0  | NA | NA   | 2  | NA | 45.6  |
| 397 | Un | 49419100-49440577 | 21,478 | 21 | Unknown | 1 | 4  | NA | 64   | 3  | NA | 77.6  |
| 398 | Un | 49441578-49466932 | 25,355 | 9  | Unknown | 1 | 1  | NA | 65.8 | 0  | NA | NA    |
| 402 | Un | 49537108-49558127 | 21,020 | 13 | Unknown | 1 | 0  | NA | NA   | 1  | NA | 81.1  |
| 404 | Un | 49581057-49601996 | 20,940 | 8  | Unknown | 1 | 0  | NA | NA   | 7  | NA | 83.9  |
| 405 | Un | 49602997-49623832 | 20,836 | 19 | Unknown | 1 | 3  | NA | 0    | 7  | NA | 0     |
| 413 | Un | 49781774-49802315 | 20,542 | 7  | Unknown | 1 | 3  | NA | 5.1  | 2  | NA | 0     |
| 417 | Un | 49868525-49888818 | 20,294 | 7  | Unknown | 1 | 3  | NA | 8.2  | 0  | NA | NA    |
| 419 | Un | 49911083-49931290 | 20,208 | 8  | Unknown | 1 | 1  | NA | 20.3 | 3  | NA | NA    |
| 422 | Un | 49976658-49997270 | 20,613 | 6  | Unknown | 1 | 3  | NA | 60.5 | 11 | NA | 82.2  |
| 423 | Un | 49998271-50018017 | 19,747 | 21 | Unknown | 1 | 4  | NA | 8.5  | 0  | NA | NA    |
| 424 | Un | 50019018-50038855 | 19,838 | 9  | Unknown | 1 | 5  | NA | 64.6 | 2  | NA | 85.1  |
| 425 | Un | 50039856-50061674 | 21,819 | 21 | Unknown | 1 | 2  | NA | 67.7 | 1  | NA | 77.4  |
| 427 | Un | 50083395-50103044 | 19,650 | 14 | Unknown | 1 | 0  | NA | NA   | 1  | NA | 3.7   |

|     |    |                   |        |    |         |   |   |    |       |    |    |       |
|-----|----|-------------------|--------|----|---------|---|---|----|-------|----|----|-------|
| 433 | Un | 50208623-50230651 | 22,029 | 6  | Unknown | 1 | 1 | NA | 61    | 2  | NA | 82.2  |
| 436 | Un | 50271895-50290710 | 18,816 | 21 | Unknown | 1 | 3 | NA | 0     | 1  | NA | NA    |
| 439 | Un | 50331895-50354498 | 22,604 | 4  | Unknown | 1 | 1 | NA | 106.7 | 1  | NA | 128.2 |
| 440 | Un | 50355499-50373966 | 18,468 | 13 | Unknown | 1 | 2 | NA | 68    | 2  | NA | NA    |
| 442 | Un | 50394398-50412766 | 18,369 | 21 | Unknown | 1 | 1 | NA | NA    | 3  | NA | 77.4  |
| 443 | Un | 50413767-50431847 | 18,081 | 8  | Unknown | 1 | 2 | NA | 68.4  | 2  | NA | 77.2  |
| 446 | Un | 50470946-50488940 | 17,995 | 7  | Unknown | 1 | 1 | NA | 2.6   | 1  | NA | 11.5  |
| 447 | 9  | 19608295-19626165 | 17,871 | 9  | Unknown | 1 | 2 | NA | 74.6  | 3  | NA | 98.8  |
| 453 | Un | 50620164-50637765 | 17,602 | 7  | Unknown | 1 | 7 | NA | 1.1   | 1  | NA | NA    |
| 455 | Un | 50657180-50674591 | 17,412 | 12 | Unknown | 1 | 3 | NA | 46    | 3  | NA | 50.6  |
| 456 | Un | 50675592-50692994 | 17,403 | 21 | Unknown | 1 | 1 | NA | NA    | 1  | NA | 1.9   |
| 468 | Un | 50899409-50916489 | 17,081 | 8  | Unknown | 1 | 1 | NA | 55.3  | 1  | NA | 77.2  |
| 470 | Un | 50935545-50952590 | 17,046 | 13 | Unknown | 1 | 0 | NA | NA    | 1  | NA | 40.4  |
| 472 | Un | 50972612-50989710 | 17,099 | 10 | Unknown | 1 | 1 | NA | 63.4  | 3  | NA | 83    |
| 473 | Un | 50990711-51007659 | 16,949 | 4  | Unknown | 1 | 4 | NA | NA    | 1  | NA | 50.4  |
| 475 | Un | 51026996-51043724 | 16,729 | 7  | Unknown | 1 | 3 | NA | 2.6   | 4  | NA | 9.6   |
| 478 | Un | 51115257-51132144 | 16,888 | 14 | Unknown | 1 | 0 | NA | NA    | 1  | NA | 2     |
| 482 | Un | 51188528-51204986 | 16,459 | 16 | Unknown | 1 | 7 | NA | 38.1  | 1  | NA | 46.8  |
| 486 | Un | 51258562-51274863 | 16,302 | 21 | Unknown | 1 | 1 | NA | 7.1   | 1  | NA | 10.1  |
| 497 | Un | 51451746-51467660 | 15,915 | 8  | Unknown | 1 | 4 | NA | 28.3  | 2  | NA | NA    |
| 501 | Un | 51519186-51536345 | 17,160 | 20 | Unknown | 1 | 1 | NA | NA    | 3  | NA | 9.3   |
| 509 | Un | 51655187-51671091 | 15,905 | 21 | Unknown | 1 | 1 | NA | 0     | 0  | NA | NA    |
| 511 | Un | 51688524-51705859 | 17,336 | 20 | Unknown | 1 | 1 | NA | 7.8   | 1  | NA | 13.3  |
| 516 | Un | 51775211-51790509 | 15,299 | 7  | Unknown | 1 | 0 | NA | NA    | 1  | NA | 63.7  |
| 517 | Un | 51791510-51806797 | 15,288 | 15 | Unknown | 1 | 7 | NA | 3.8   | 10 | NA | 6.2   |
| 520 | Un | 51840909-51856407 | 15,499 | 13 | Unknown | 1 | 1 | NA | 65.5  | 6  | NA | NA    |
| 521 | Un | 51857408-51872569 | 15,162 | 4  | Unknown | 1 | 0 | NA | NA    | 1  | NA | 127.4 |
| 522 | Un | 51873570-51889777 | 16,208 | 9  | Unknown | 1 | 4 | NA | 74.6  | 5  | NA | 100   |
| 524 | Un | 51906862-51921932 | 15,071 | 6  | Unknown | 1 | 2 | NA | 60.5  | 3  | NA | 82.2  |
| 529 | Un | 51988383-52003350 | 14,968 | 20 | Unknown | 1 | 3 | NA | 11.1  | 2  | NA | 7     |
| 542 | Un | 52201296-52216041 | 14,746 | 17 | Unknown | 1 | 1 | NA | 0     | 1  | NA | 0     |
| 545 | Un | 52250580-52265215 | 14,636 | 4  | Unknown | 1 | 2 | NA | 1.3   | 2  | NA | NA    |
| 550 | Un | 52328471-52342789 | 14,319 | 21 | Unknown | 1 | 3 | NA | 64    | 6  | NA | 77.6  |
| 559 | Un | 52499012-52513129 | 14,118 | 21 | Unknown | 1 | 0 | NA | NA    | 1  | NA | 13.4  |
| 560 | Un | 52514130-52528076 | 13,947 | 4  | Unknown | 1 | 4 | NA | 1.3   | 0  | NA | NA    |
| 562 | Un | 52543993-52561524 | 17,532 | 8  | Unknown | 1 | 5 | NA | 73.2  | 1  | NA | NA    |
| 563 | Un | 52562525-52576412 | 13,888 | 11 | Unknown | 1 | 4 | NA | NA    | 5  | NA | 17.8  |
| 564 | Un | 52577413-52591281 | 13,869 | 19 | Unknown | 1 | 9 | NA | 46.1  | 4  | NA | 60.5  |
| 578 | Un | 52789509-52803384 | 13,876 | 12 | Unknown | 1 | 0 | NA | NA    | 3  | NA | 47.8  |
| 579 | Un | 52804385-52821172 | 16,788 | 13 | Unknown | 1 | 4 | NA | 18.8  | 1  | NA | 30.1  |
| 587 | Un | 52923191-52936646 | 13,456 | 3  | Unknown | 1 | 4 | NA | 72.9  | 2  | NA | NA    |
| 593 | Un | 53009594-53022925 | 13,332 | 1  | Unknown | 1 | 4 | NA | 97.6  | 4  | NA | 122.8 |
| 599 | Un | 53094667-53107818 | 13,152 | 11 | Unknown | 1 | 2 | NA | 13.5  | 1  | NA | 25.8  |
| 600 | Un | 53108819-53121857 | 13,039 | 21 | Unknown | 1 | 0 | NA | NA    | 5  | NA | 77.4  |
| 601 | Un | 53122858-53135889 | 13,032 | 15 | Unknown | 1 | 6 | NA | 51.5  | 6  | NA | 55.4  |
| 604 | Un | 53165806-53178953 | 13,148 | 9  | Unknown | 1 | 1 | NA | 69.4  | 2  | NA | 94.7  |
| 605 | Un | 53179954-53193336 | 13,383 | 4  | Unknown | 1 | 3 | NA | 105   | 3  | NA | 127.4 |

|     |    |                   |        |    |         |   |    |    |      |   |    |       |
|-----|----|-------------------|--------|----|---------|---|----|----|------|---|----|-------|
| 613 | Un | 53293363-53306362 | 13,000 | 21 | Unknown | 1 | 1  | NA | 0    | 0 | NA | NA    |
| 615 | Un | 53321160-53333933 | 12,774 | 2  | Unknown | 1 | 2  | NA | 8.6  | 1 | NA | 21.4  |
| 618 | Un | 53362880-53377982 | 15,103 | 9  | Unknown | 1 | 1  | NA | 61.9 | 0 | NA | NA    |
| 620 | Un | 53395873-53408554 | 12,682 | 2  | Unknown | 1 | 2  | NA | 18.5 | 0 | NA | NA    |
| 621 | Un | 53409555-53422235 | 12,681 | 12 | Unknown | 1 | 1  | NA | 17.8 | 1 | NA | 19.9  |
| 625 | Un | 53464341-53476958 | 12,618 | 21 | Unknown | 1 | 3  | NA | 10.9 | 0 | NA | NA    |
| 632 | Un | 53561747-53574175 | 12,429 | 4  | Unknown | 1 | 0  | NA | NA   | 2 | NA | 51    |
| 637 | Un | 53628730-53641078 | 12,349 | 9  | Unknown | 1 | 1  | NA | 64.6 | 0 | NA | NA    |
| 642 | Un | 53696395-53708682 | 12,288 | 10 | Unknown | 1 | 1  | NA | 61   | 0 | NA | NA    |
| 664 | Un | 53988298-54001569 | 13,272 | 9  | Unknown | 1 | 0  | NA | NA   | 5 | NA | 100.3 |
| 676 | 13 | 20071502-20083130 | 11,629 | 13 | Unknown | 1 | 1  | NA | 66.6 | 1 | NA | 79    |
| 680 | Un | 54210990-54222567 | 11,578 | 9  | Unknown | 1 | 0  | NA | NA   | 3 | NA | 100   |
| 681 | Un | 54223568-54235116 | 11,549 | 13 | Unknown | 1 | 2  | NA | 64.3 | 4 | NA | 76.2  |
| 682 | Un | 54236117-54248584 | 12,468 | 21 | Unknown | 1 | 1  | NA | 8.5  | 0 | NA | NA    |
| 683 | Un | 54249585-54261089 | 11,505 | 1  | Unknown | 1 | 0  | NA | NA   | 1 | NA | 121.1 |
| 689 | Un | 54325891-54337328 | 11,438 | 5  | Unknown | 1 | 2  | NA | 0.2  | 4 | NA | 0.4   |
| 691 | Un | 54350689-54362032 | 11,344 | 2  | Unknown | 1 | 1  | NA | 72.4 | 3 | NA | 88.6  |
| 695 | Un | 54400542-54411831 | 11,290 | 15 | Unknown | 1 | 0  | NA | NA   | 2 | NA | 81.7  |
| 697 | Un | 54425236-54436497 | 11,262 | 9  | Unknown | 1 | 3  | NA | 63.7 | 0 | NA | NA    |
| 698 | Un | 54437498-54451049 | 13,552 | 13 | Unknown | 1 | 0  | NA | NA   | 1 | NA | 20.2  |
| 707 | Un | 54551394-54562409 | 11,016 | 15 | Unknown | 1 | 3  | NA | 0.3  | 2 | NA | 5     |
| 713 | Un | 54623353-54634314 | 10,962 | 7  | Unknown | 1 | 0  | NA | NA   | 2 | NA | 32.6  |
| 717 | Un | 54671166-54682090 | 10,925 | 13 | Unknown | 1 | 1  | NA | 64.8 | 0 | NA | NA    |
| 718 | Un | 54683091-54694002 | 10,912 | 10 | Unknown | 1 | 13 | NA | 62.2 | 4 | NA | 84.1  |
| 719 | Un | 54695003-54705978 | 10,976 | 16 | Unknown | 1 | 0  | NA | NA   | 2 | NA | 84    |
| 727 | Un | 54789801-54800560 | 10,760 | 1  | Unknown | 1 | 1  | NA | 10.5 | 6 | NA | 8.6   |
| 729 | Un | 54813406-54824116 | 10,711 | 5  | Unknown | 1 | 1  | NA | 13.5 | 1 | NA | 18.9  |
| 730 | Un | 54825117-54835821 | 10,705 | 15 | Unknown | 1 | 3  | NA | 67.4 | 0 | NA | NA    |
| 732 | Un | 54848788-54859473 | 10,686 | 11 | Unknown | 1 | 1  | NA | 0    | 0 | NA | NA    |
| 735 | Un | 54884944-54895928 | 10,985 | 15 | Unknown | 1 | 0  | NA | NA   | 3 | NA | 80.4  |
| 739 | Un | 54935473-54946056 | 10,584 | 14 | Unknown | 1 | 0  | NA | NA   | 1 | NA | 5.6   |
| 740 | Un | 54947057-54957634 | 10,578 | 9  | Unknown | 1 | 1  | NA | 74.6 | 2 | NA | 100   |
| 741 | Un | 54958635-54969306 | 10,672 | 1  | Unknown | 1 | 1  | NA | 5.2  | 4 | NA | 0.3   |
| 742 | Un | 54970307-54980780 | 10,474 | 10 | Unknown | 1 | 2  | NA | 0    | 3 | NA | 6.1   |
| 745 | Un | 55005167-55015604 | 10,438 | 15 | Unknown | 1 | 0  | NA | NA   | 1 | NA | 6.2   |
| 748 | Un | 55039432-55049815 | 10,384 | 21 | Unknown | 1 | 1  | NA | 11.6 | 0 | NA | NA    |
| 749 | Un | 55050816-55061334 | 10,519 | 21 | Unknown | 1 | 1  | NA | 0    | 0 | NA | NA    |
| 751 | Un | 55073677-55084012 | 10,336 | 15 | Unknown | 1 | 2  | NA | 3.8  | 0 | NA | NA    |
| 757 | Un | 55142438-55152645 | 10,208 | 9  | Unknown | 1 | 2  | NA | 74.6 | 3 | NA | 100   |
| 758 | Un | 55153646-55163846 | 10,201 | 16 | Unknown | 1 | 0  | NA | NA   | 1 | NA | 0     |
| 761 | Un | 55187184-55197327 | 10,144 | 4  | Unknown | 1 | 0  | NA | NA   | 1 | NA | 50.4  |
| 762 | Un | 55198328-55208455 | 10,128 | 14 | Unknown | 1 | 1  | NA | 0.4  | 0 | NA | NA    |
| 764 | Un | 55220561-55230649 | 10,089 | 21 | Unknown | 1 | 1  | NA | 11.8 | 2 | NA | 11.5  |
| 768 | Un | 55264836-55274873 | 10,038 | 16 | Unknown | 1 | 3  | NA | 67.8 | 0 | NA | NA    |
| 786 | Un | 55471340-55481338 | 9,999  | 13 | Unknown | 1 | 1  | NA | 64.8 | 0 | NA | NA    |
| 793 | Un | 55550131-55559845 | 9,715  | 18 | Unknown | 1 | 1  | NA | 26.1 | 1 | NA | NA    |
| 796 | Un | 55583639-55594378 | 10,740 | 6  | Unknown | 1 | 0  | NA | NA   | 1 | NA | 81.1  |

|      |    |                   |        |    |         |   |    |    |      |    |    |       |
|------|----|-------------------|--------|----|---------|---|----|----|------|----|----|-------|
| 806  | Un | 55692216-55701794 | 9,579  | 4  | Unknown | 1 | 1  | NA | 89.2 | 1  | NA | NA    |
| 812  | Un | 55794638-55804183 | 9,546  | 8  | Unknown | 1 | 0  | NA | NA   | 4  | NA | 77.2  |
| 814  | Un | 55816024-55825525 | 9,502  | 12 | Unknown | 1 | 2  | NA | 12.8 | 3  | NA | 10.4  |
| 822  | Un | 55903920-55913364 | 9,445  | 13 | Unknown | 1 | 5  | NA | 51.2 | 1  | NA | 65.9  |
| 829  | Un | 55977368-55986733 | 9,366  | 12 | Unknown | 1 | 1  | NA | 55.5 | 0  | NA | NA    |
| 830  | Un | 55987734-55997092 | 9,359  | 15 | Unknown | 1 | 3  | NA | 4.2  | 1  | NA | 9     |
| 834  | Un | 56029278-56038557 | 9,280  | 13 | Unknown | 1 | 0  | NA | NA   | 2  | NA | 79    |
| 837  | Un | 56060876-56070125 | 9,250  | 7  | Unknown | 1 | 2  | NA | 45.4 | 2  | NA | 63.7  |
| 842  | Un | 56113504-56122641 | 9,138  | 8  | Unknown | 1 | 1  | NA | 73.2 | 4  | NA | 89.2  |
| 843  | Un | 56123642-56132773 | 9,132  | 2  | Unknown | 1 | 0  | NA | NA   | 6  | NA | 38.1  |
| 857  | Un | 56266790-56275772 | 8,983  | 16 | Unknown | 1 | 0  | NA | NA   | 2  | NA | 40.7  |
| 861  | Un | 56306684-56315644 | 8,961  | 9  | Unknown | 1 | 0  | NA | NA   | 3  | NA | 94.7  |
| 868  | Un | 56376232-56385129 | 8,898  | 1  | Unknown | 1 | 1  | NA | 94.3 | 1  | NA | 111.6 |
| 869  | Un | 56386130-56396944 | 10,815 | 1  | Unknown | 1 | 1  | NA | 6.6  | 1  | NA | 3.6   |
| 872  | Un | 56417956-56426818 | 8,863  | 20 | Unknown | 1 | 0  | NA | NA   | 1  | NA | 5.7   |
| 877  | Un | 56470671-56479449 | 8,779  | 6  | Unknown | 1 | 1  | NA | 60.1 | 0  | NA | NA    |
| 882  | Un | 56519794-56528503 | 8,710  | 9  | Unknown | 1 | 1  | NA | 5.6  | 9  | NA | NA    |
| 889  | Un | 56590570-56599187 | 8,618  | 1  | Unknown | 1 | 1  | NA | 97.6 | 2  | NA | 121.1 |
| 891  | Un | 56609799-56618406 | 8,608  | 8  | Unknown | 1 | 2  | NA | 71.1 | 0  | NA | NA    |
| 894  | Un | 56638581-56647142 | 8,562  | 21 | Unknown | 1 | 0  | NA | NA   | 2  | NA | 17.4  |
| 906  | Un | 56755315-56763764 | 8,450  | 9  | Unknown | 1 | 0  | NA | NA   | 1  | NA | 90    |
| 913  | Un | 56823823-56832224 | 8,402  | 21 | Unknown | 1 | 3  | NA | 7.1  | 1  | NA | 2.7   |
| 926  | Un | 56945457-56953670 | 8,214  | 3  | Unknown | 1 | 0  | NA | NA   | 7  | NA | 46.2  |
| 930  | Un | 56982433-56990599 | 8,167  | 13 | Unknown | 1 | 0  | NA | NA   | 4  | NA | 76.2  |
| 931  | Un | 56991600-56999761 | 8,162  | 4  | Unknown | 1 | 1  | NA | 0    | 0  | NA | NA    |
| 935  | Un | 57028453-57036596 | 8,144  | 3  | Unknown | 1 | 3  | NA | 14.8 | 0  | NA | NA    |
| 936  | Un | 57037597-57045738 | 8,142  | 1  | Unknown | 1 | 0  | NA | NA   | 1  | NA | 54.7  |
| 937  | Un | 57046739-57054879 | 8,141  | 9  | Unknown | 1 | 0  | NA | NA   | 1  | NA | 90    |
| 938  | Un | 57055880-57064019 | 8,140  | 8  | Unknown | 1 | 0  | NA | NA   | 2  | NA | 89.7  |
| 944  | Un | 57110641-57118739 | 8,099  | 2  | Unknown | 1 | 1  | NA | 79.7 | 0  | NA | NA    |
| 953  | Un | 57192712-57200726 | 8,015  | 7  | Unknown | 1 | 1  | NA | 95.1 | 1  | NA | 129.8 |
| 954  | Un | 57201727-57209734 | 8,008  | 7  | Unknown | 1 | 0  | NA | NA   | 1  | NA | 32.6  |
| 957  | Un | 57228709-57236667 | 7,959  | 14 | Unknown | 1 | 0  | NA | NA   | 2  | NA | 52.7  |
| 962  | Un | 57275801-57283719 | 7,919  | 13 | Unknown | 1 | 0  | NA | NA   | 5  | NA | 60.9  |
| 968  | 15 | 16190873-16198764 | 7,892  | 15 | Unknown | 1 | 0  | NA | NA   | 1  | NA | 80.4  |
| 977  | Un | 57406596-57414431 | 7,836  | 17 | Unknown | 1 | 0  | NA | NA   | 1  | NA | 1.8   |
| 978  | Un | 57415432-57423259 | 7,828  | 4  | Unknown | 1 | 0  | NA | NA   | 2  | NA | 62.8  |
| 986  | Un | 57486141-57493844 | 7,704  | 21 | Unknown | 1 | 2  | NA | 0    | 2  | NA | 11.2  |
| 994  | Un | 57560167-57567818 | 7,652  | 13 | Unknown | 1 | 2  | NA | 64.3 | 4  | NA | 76.2  |
| 996  | Un | 57577468-57585103 | 7,636  | 21 | Unknown | 1 | 1  | NA | 8.5  | 0  | NA | NA    |
| 999  | Un | 57603360-57610962 | 7,603  | 10 | Unknown | 1 | 21 | NA | 62.2 | 14 | NA | 84.4  |
| 1001 | Un | 57620562-57628158 | 7,597  | 20 | Unknown | 1 | 1  | NA | 49.3 | 0  | NA | NA    |
| 1008 | Un | 57684233-57691769 | 7,537  | 12 | Unknown | 1 | 1  | NA | 43.7 | 2  | NA | 50.6  |
| 1009 | Un | 57692770-57700288 | 7,519  | 13 | Unknown | 1 | 1  | NA | 64.3 | 5  | NA | 76.2  |
| 1010 | Un | 57701289-57710250 | 8,962  | 21 | Unknown | 1 | 0  | NA | NA   | 1  | NA | 10.1  |
| 1014 | Un | 57737580-57745044 | 7,465  | 20 | Unknown | 1 | 2  | NA | 10.4 | 6  | NA | 5.8   |
| 1019 | Un | 57780348-57787785 | 7,438  | 9  | Unknown | 1 | 0  | NA | NA   | 2  | NA | 40.4  |

|      |    |                   |       |    |         |   |   |    |       |   |    |       |
|------|----|-------------------|-------|----|---------|---|---|----|-------|---|----|-------|
| 1020 | Un | 57788786-57796210 | 7,425 | 4  | Unknown | 1 | 1 | NA | 107.3 | 0 | NA | NA    |
| 1023 | Un | 57814059-57821464 | 7,406 | 3  | Unknown | 1 | 0 | NA | NA    | 1 | NA | 0     |
| 1029 | Un | 57866552-57873922 | 7,371 | 15 | Unknown | 1 | 1 | NA | 2.8   | 0 | NA | NA    |
| 1041 | Un | 57966706-57974006 | 7,301 | 21 | Unknown | 1 | 1 | NA | NA    | 1 | NA | 1.9   |
| 1049 | Un | 58033452-58040717 | 7,266 | 4  | Unknown | 1 | 1 | NA | 106.7 | 2 | NA | 127.4 |
| 1050 | Un | 58041718-58048980 | 7,263 | 9  | Unknown | 1 | 0 | NA | NA    | 3 | NA | 103.2 |
| 1058 | Un | 58107766-58114972 | 7,207 | 8  | Unknown | 1 | 2 | NA | 60.8  | 1 | NA | 77.2  |
| 1060 | Un | 58124278-58131480 | 7,203 | 11 | Unknown | 1 | 0 | NA | NA    | 1 | NA | 27.8  |
| 1067 | Un | 58181913-58189096 | 7,184 | 19 | Unknown | 1 | 1 | NA | 10.3  | 0 | NA | NA    |
| 1070 | Un | 58207785-58214942 | 7,158 | 1  | Unknown | 1 | 0 | NA | NA    | 5 | NA | 8.6   |
| 1073 | Un | 58232223-58239350 | 7,128 | 4  | Unknown | 1 | 0 | NA | NA    | 2 | NA | 3     |
| 1075 | Un | 58248464-58255667 | 7,204 | 8  | Unknown | 1 | 1 | NA | NA    | 8 | NA | 67.5  |
| 1082 | Un | 58305532-58313200 | 7,669 | 16 | Unknown | 1 | 3 | NA | 30.6  | 0 | NA | NA    |
| 1087 | Un | 58346812-58353833 | 7,022 | 8  | Unknown | 1 | 1 | NA | 37.1  | 0 | NA | NA    |
| 1088 | Un | 58354834-58361851 | 7,018 | 1  | Unknown | 1 | 2 | NA | 1.4   | 0 | NA | NA    |
| 1090 | Un | 58370965-58377974 | 7,010 | 13 | Unknown | 1 | 1 | NA | 39.2  | 0 | NA | NA    |
| 1093 | Un | 58394962-58401921 | 6,960 | 10 | Unknown | 1 | 0 | NA | NA    | 1 | NA | 83    |
| 1099 | Un | 58442928-58449842 | 6,915 | 9  | Unknown | 1 | 0 | NA | NA    | 5 | NA | 92.7  |
| 1108 | Un | 58516038-58522861 | 6,824 | 21 | Unknown | 1 | 1 | NA | 67.7  | 1 | NA | 77.6  |
| 1112 | Un | 58547512-58554305 | 6,794 | 19 | Unknown | 1 | 0 | NA | NA    | 1 | NA | 0     |
| 1124 | Un | 58642106-58648769 | 6,664 | 17 | Unknown | 1 | 2 | NA | 2     | 4 | NA | 0     |
| 1127 | Un | 58665171-58671783 | 6,613 | 16 | Unknown | 1 | 1 | NA | 26.1  | 0 | NA | NA    |
| 1130 | Un | 58688105-58694710 | 6,606 | 15 | Unknown | 1 | 3 | NA | 2.8   | 7 | NA | 6.2   |
| 1132 | Un | 58703412-58709991 | 6,580 | 13 | Unknown | 1 | 0 | NA | NA    | 4 | NA | 69.6  |
| 1141 | Un | 58775011-58781497 | 6,487 | 14 | Unknown | 1 | 2 | NA | NA    | 4 | NA | 2     |
| 1142 | Un | 58782498-58788984 | 6,487 | 20 | Unknown | 1 | 1 | NA | 37.8  | 7 | NA | 37.6  |
| 1154 | Un | 58872130-58878547 | 6,418 | 13 | Unknown | 1 | 1 | NA | 68    | 1 | NA | 79    |
| 1156 | Un | 58886966-58893374 | 6,409 | 5  | Unknown | 1 | 3 | NA | 11.1  | 0 | NA | NA    |
| 1160 | Un | 58916963-58923327 | 6,365 | 12 | Unknown | 1 | 1 | NA | 43.7  | 0 | NA | NA    |
| 1170 | Un | 58991377-58997682 | 6,306 | 2  | Unknown | 1 | 1 | NA | 24.5  | 0 | NA | NA    |
| 1173 | Un | 59013853-59020155 | 6,303 | 11 | Unknown | 1 | 1 | NA | 44.2  | 3 | NA | 63.5  |
| 1181 | Un | 59072976-59079224 | 6,249 | 20 | Unknown | 1 | 1 | NA | 7.8   | 1 | NA | 9.3   |
| 1194 | Un | 59172468-59178813 | 6,346 | 9  | Unknown | 1 | 0 | NA | NA    | 1 | NA | 32.8  |
| 1199 | Un | 59208628-59214706 | 6,079 | 3  | Unknown | 1 | 1 | NA | 72.9  | 0 | NA | NA    |
| 1204 | Un | 59244749-59250799 | 6,051 | 19 | Unknown | 1 | 2 | NA | 10.3  | 1 | NA | 3.3   |
| 1210 | Un | 59289613-59295617 | 6,005 | 21 | Unknown | 1 | 5 | NA | 7.1   | 2 | NA | 2.7   |
| 1212 | Un | 59303622-59309615 | 5,994 | 5  | Unknown | 1 | 0 | NA | NA    | 2 | NA | 76.5  |
| 1217 | Un | 59338681-59344656 | 5,976 | 21 | Unknown | 1 | 1 | NA | 0     | 0 | NA | NA    |
| 1226 | Un | 59401927-59407835 | 5,909 | 11 | Unknown | 1 | 0 | NA | NA    | 1 | NA | 8.6   |
| 1238 | Un | 59485131-59490955 | 5,825 | 3  | Unknown | 1 | 3 | NA | 75    | 0 | NA | NA    |
| 1249 | Un | 59564168-59569895 | 5,728 | 11 | Unknown | 1 | 1 | NA | 0     | 2 | NA | 0     |
| 1265 | Un | 59673974-59679712 | 5,739 | 17 | Unknown | 1 | 3 | NA | 0.3   | 0 | NA | NA    |
| 1269 | Un | 59701145-59706743 | 5,599 | 20 | Unknown | 1 | 3 | NA | 21.6  | 4 | NA | NA    |
| 1276 | Un | 59749913-59755470 | 5,558 | 13 | Unknown | 1 | 2 | NA | 64.3  | 0 | NA | NA    |
| 1278 | Un | 59763027-59768578 | 5,552 | 4  | Unknown | 1 | 3 | NA | 0     | 0 | NA | NA    |
| 1282 | Un | 59790253-59795762 | 5,510 | 15 | Unknown | 1 | 1 | NA | 0.3   | 2 | NA | 0     |
| 1285 | Un | 59810044-59815547 | 5,504 | 13 | Unknown | 1 | 1 | NA | 65.8  | 0 | NA | NA    |

|      |    |                   |       |    |         |   |   |    |      |   |    |       |
|------|----|-------------------|-------|----|---------|---|---|----|------|---|----|-------|
| 1286 | Un | 59816548-59822925 | 6,378 | 6  | Unknown | 1 | 0 | NA | NA   | 2 | NA | 6.8   |
| 1287 | Un | 59823926-59829422 | 5,497 | 15 | Unknown | 1 | 1 | NA | 13.7 | 1 | NA | NA    |
| 1290 | Un | 59843506-59848992 | 5,487 | 1  | Unknown | 1 | 2 | NA | 52.9 | 0 | NA | NA    |
| 1292 | Un | 59858071-59863555 | 5,485 | 2  | Unknown | 1 | 3 | NA | 26.4 | 1 | NA | 37.8  |
| 1294 | Un | 59871040-59876620 | 5,581 | 6  | Unknown | 1 | 0 | NA | NA   | 2 | NA | 14.7  |
| 1298 | Un | 59899551-59905001 | 5,451 | 17 | Unknown | 1 | 2 | NA | 2    | 2 | NA | NA    |
| 1322 | Un | 60058027-60064074 | 6,048 | 12 | Unknown | 1 | 0 | NA | NA   | 1 | NA | 40.1  |
| 1326 | Un | 60084738-60090014 | 5,277 | 11 | Unknown | 1 | 0 | NA | NA   | 1 | NA | 5.3   |
| 1327 | Un | 60091015-60096434 | 5,420 | 4  | Unknown | 1 | 0 | NA | NA   | 1 | NA | 50.4  |
| 1331 | Un | 60117280-60122507 | 5,228 | 7  | Unknown | 1 | 1 | NA | 8.2  | 1 | NA | 18.2  |
| 1332 | Un | 60123508-60128829 | 5,322 | 7  | Unknown | 1 | 1 | NA | 22.9 | 0 | NA | NA    |
| 1334 | Un | 60136508-60141715 | 5,208 | 3  | Unknown | 1 | 0 | NA | NA   | 1 | NA | 2.7   |
| 1336 | Un | 60148923-60154126 | 5,204 | 13 | Unknown | 1 | 1 | NA | 65.8 | 1 | NA | 80    |
| 1340 | Un | 60175586-60180783 | 5,198 | 18 | Unknown | 1 | 4 | NA | 31.7 | 0 | NA | NA    |
| 1348 | Un | 60225181-60230339 | 5,159 | 7  | Unknown | 1 | 0 | NA | NA   | 1 | NA | 95.4  |
| 1351 | Un | 60244643-60249779 | 5,137 | 13 | Unknown | 1 | 1 | NA | 16.1 | 0 | NA | NA    |
| 1352 | Un | 60250780-60255915 | 5,136 | 12 | Unknown | 1 | 4 | NA | NA   | 2 | NA | 19.9  |
| 1353 | Un | 60256916-60262050 | 5,135 | 6  | Unknown | 1 | 1 | NA | 60.1 | 0 | NA | NA    |
| 1361 | Un | 60306588-60312291 | 5,704 | 21 | Unknown | 1 | 0 | NA | NA   | 2 | NA | 10.1  |
| 1365 | Un | 60332199-60337369 | 5,171 | 15 | Unknown | 1 | 1 | NA | 7.4  | 1 | NA | NA    |
| 1372 | Un | 60376086-60381181 | 5,096 | 13 | Unknown | 1 | 0 | NA | NA   | 1 | NA | 76.2  |
| 1375 | Un | 60394914-60399882 | 4,969 | 12 | Unknown | 1 | 1 | NA | 29.6 | 0 | NA | NA    |
| 1381 | Un | 60432449-60437367 | 4,919 | 8  | Unknown | 1 | 1 | NA | 60.8 | 0 | NA | NA    |
| 1383 | Un | 60447261-60452371 | 5,111 | 6  | Unknown | 1 | 1 | NA | 60.5 | 0 | NA | NA    |
| 1384 | Un | 60453372-60458274 | 4,903 | 1  | Unknown | 1 | 1 | NA | 71.6 | 4 | NA | 111.6 |
| 1395 | Un | 60522052-60526831 | 4,780 | 9  | Unknown | 1 | 0 | NA | NA   | 2 | NA | 100   |
| 1405 | Un | 60583829-60589568 | 5,740 | 12 | Unknown | 1 | 0 | NA | NA   | 2 | NA | 94.3  |
| 1430 | Un | 60736464-60740997 | 4,534 | 16 | Unknown | 1 | 1 | NA | 25.8 | 0 | NA | NA    |
| 1532 | Un | 61339158-61344191 | 5,034 | 3  | Unknown | 1 | 1 | NA | 19.1 | 1 | NA | 27.1  |

Note (a): This scaffold mapped to two different chromosomes with the read correlation method (chromosome 16 in the FTC cross and chromosome 10 in the BEPA cross). This mapping is supported by 7 SNPs in the FTC cross, but the peak correlation is driven by a single SNP (chrUn:33,811,784). A BLAT search with a 100 base region surrounding this SNP maps to many regions of the genome, and the rest of the 6 FTC SNPs correlate with a region on chromosome 10. Therefore the likely location of this scaffold in both crosses is chromosome 10. Note (b): This scaffold also mapped to two different chromosomes with the read correlation method (chromosome 20 in the FTC cross and chromosome 12 in the BEPA cross). The BEPA marker is supported by 1 SNP (chrUn:46,516,721). A BLAT search with a 100 base region surrounding this SNP maps perfectly to many regions of the genome, including chromosome 12 and 20. Therefore the likely location of this scaffold in both crosses is chromosome 20.
