# Supplementary material for: Genome Assembly Improvement and Mapping Convergently Evolved Skeletal Traits in Sticklebacks with Genotyping-by-Sequencing
Source: Oxford University Press journal article supplement (doi:10.1534/g3.115.017905), 2015-06-05
Supplement: 017905_figures3.pdf [file 017905_figures3.pdf]

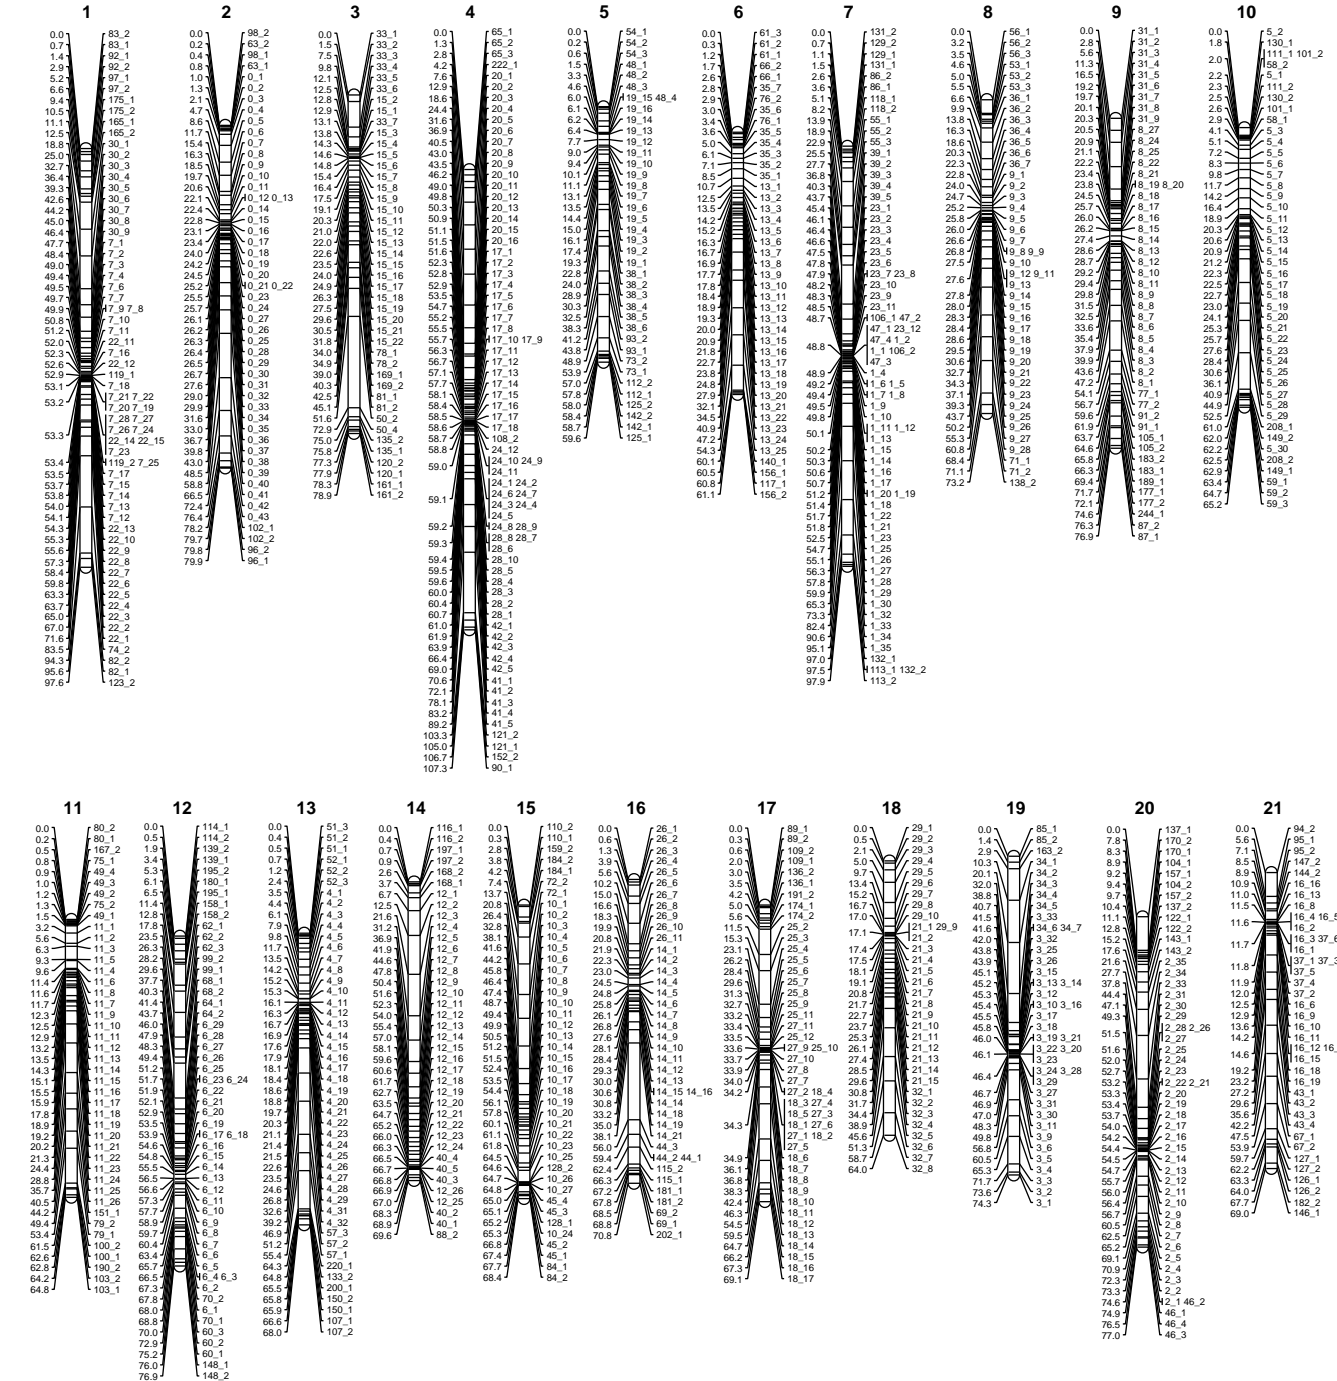

**Figure S3** Linkage map from FTC x LITC cross

Diagram of linkage map generated from the FTC x LITC cross. For each chromosome, genetic position of each marker is shown on the left in centimorgans, and marker name is shown on the right.
