# Supplementary material for: Genome Assembly Improvement and Mapping Convergently Evolved Skeletal Traits in Sticklebacks with Genotyping-by-Sequencing
Source: Oxford University Press journal article supplement (doi:10.1534/g3.115.017905), 2015-06-05
Supplement: 017905_figures5.pdf [file 017905_figures5.pdf]

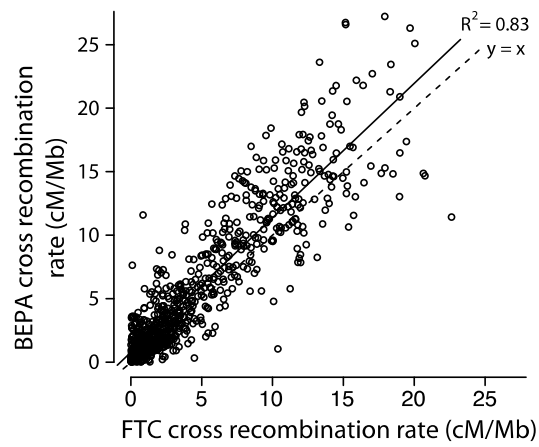

**Figure S5 High correlation of recombination rates**

Recombination rate in the FTC cross plotted against recombination rate in the BEPA cross. Each point is a marker. Recombination rates were calculated by taking the local slope of the loess-smoothed genetic vs. physical plots shown in Figure 3. Recombination rates are highly correlated ( $R^2 = 0.83$ ). Solid line: best fit line from a linear regression; dotted line:  $y=x$ . Total genetic map size was smaller in the FTC cross (1569.9 cM) compared to the BEPA cross (1963.3 cM). Most points were displaced from the  $y=x$  line, indicating a higher recombination rate throughout the genome in the BEPA cross.
