# Supplementary material for: Genome Assembly Improvement and Mapping Convergently Evolved Skeletal Traits in Sticklebacks with Genotyping-by-Sequencing
Source: Oxford University Press journal article supplement (doi:10.1534/g3.115.017905), 2015-06-05
Supplement: 017905_figures8.pdf [file 017905_figures8.pdf]

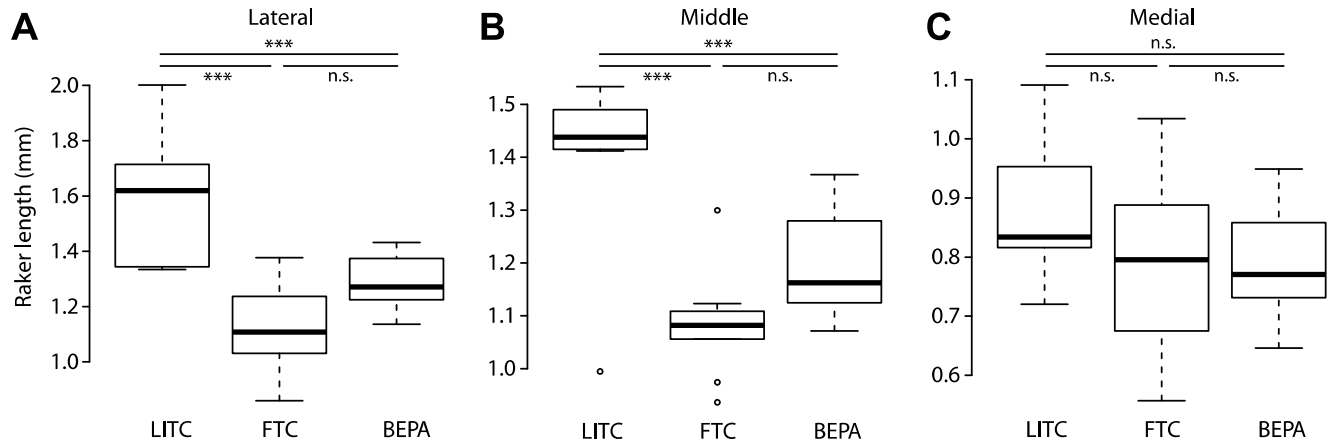

**Figure S8 Convergent evolution of freshwater gill raker length reduction**

Gill raker lengths were measured in three domains: lateral (A), middle (B), and medial (C) in marine (LITC) and freshwater (FTC and BEPA) lab-reared fish. See Figure 5A for a diagram of gill raker length measurements. Gill raker lengths were back transformed to values expected for a 50 mm standard length fish. \*\*\* indicates  $p < 0.001$ , n.s. = not significant by Tukey's HSD test.  $n=10$  per population.
