# Supplementary material for: Genome Assembly Improvement and Mapping Convergently Evolved Skeletal Traits in Sticklebacks with Genotyping-by-Sequencing
Source: Oxford University Press journal article supplement (doi:10.1534/g3.115.017905), 2015-06-05
Supplement: 017905_tables1.pdf [file 017905_tables1.pdf]

**Table S1 Primers used in this study.** Primers were used for PCR, index sequencing (“Index”), or making adapters.

| Name        | Primer                                                                  | Type                       | Barcode  |
|-------------|-------------------------------------------------------------------------|----------------------------|----------|
| PCR1        | CAAGCAGAAGACGGCATAACGAGATCGGTCTCGGCATTCCTGCTGAAC<br>CGCTCTCCGATCT       | PCR (no indexing)          | NA       |
| PCR1_index1 | CAAGCAGAAGACGGCATAACGAGATcgtgatCGGTCTCGGCATTCCTGC<br>TGAACCGCTCTCCGATCT | PCR (indexing)             | NA       |
| PCR1_index2 | CAAGCAGAAGACGGCATAACGAGATacatcgCGGTCTCGGCATTCCTGC<br>TGAACCGCTCTCCGATCT | PCR (indexing)             | NA       |
| PCR1_index3 | CAAGCAGAAGACGGCATAACGAGATgcctaaCGGTCTCGGCATTCCTGC<br>TGAACCGCTCTCCGATCT | PCR (indexing)             | NA       |
| PCR1_index4 | CAAGCAGAAGACGGCATAACGAGATtggtcaCGGTCTCGGCATTCCTGC<br>TGAACCGCTCTCCGATCT | PCR (indexing)             | NA       |
| PCR2        | AATGATACGGCGACCACCGAGATCTACACTCTTCCCTACACGACGCT<br>CTCCGATCT            | PCR (indexing/no indexing) | NA       |
| Seq_index   | GATCGGAAGAGCGGTTCAGCAGGAATGCCGAGACCG                                    | Index                      | NA       |
| ApeK1Y_A1F  | ACACTCTTCCCTACACGACGCTCTCCGATCTctcc                                     | Adapter                    | ctcc     |
| ApeK1Y_A2F  | ACACTCTTCCCTACACGACGCTCTCCGATCTgca                                      | Adapter                    | tgca     |
| ApeK1Y_A3F  | ACACTCTTCCCTACACGACGCTCTCCGATCTacta                                     | Adapter                    | acta     |
| ApeK1Y_A4F  | ACACTCTTCCCTACACGACGCTCTCCGATCTcaga                                     | Adapter                    | caga     |
| ApeK1Y_A5F  | ACACTCTTCCCTACACGACGCTCTCCGATCTaact                                     | Adapter                    | aact     |
| ApeK1Y_A6F  | ACACTCTTCCCTACACGACGCTCTCCGATCTgctg                                     | Adapter                    | gctg     |
| ApeK1Y_A7F  | ACACTCTTCCCTACACGACGCTCTCCGATCTcgat                                     | Adapter                    | cgat     |
| ApeK1Y_A8F  | ACACTCTTCCCTACACGACGCTCTCCGATCTgtaa                                     | Adapter                    | gtaa     |
| ApeK1Y_A9F  | ACACTCTTCCCTACACGACGCTCTCCGATCTgcca                                     | Adapter                    | tgcca    |
| ApeK1Y_A10F | ACACTCTTCCCTACACGACGCTCTCCGATCTcgctt                                    | Adapter                    | cgctt    |
| ApeK1Y_A11F | ACACTCTTCCCTACACGACGCTCTCCGATCTcacc                                     | Adapter                    | tcacc    |
| ApeK1Y_A12F | ACACTCTTCCCTACACGACGCTCTCCGATCTctagc                                    | Adapter                    | ctagc    |
| ApeK1Y_B1F  | ACACTCTTCCCTACACGACGCTCTCCGATCTacaaa                                    | Adapter                    | acaaa    |
| ApeK1Y_B2F  | ACACTCTTCCCTACACGACGCTCTCCGATCTtctc                                     | Adapter                    | ttctc    |
| ApeK1Y_B3F  | ACACTCTTCCCTACACGACGCTCTCCGATCTagccc                                    | Adapter                    | agccc    |
| ApeK1Y_B4F  | ACACTCTTCCCTACACGACGCTCTCCGATCTgtatt                                    | Adapter                    | gtatt    |
| ApeK1Y_B5F  | ACACTCTTCCCTACACGACGCTCTCCGATCTctgta                                    | Adapter                    | ctgta    |
| ApeK1Y_B6F  | ACACTCTTCCCTACACGACGCTCTCCGATCTaccgt                                    | Adapter                    | accgt    |
| ApeK1Y_B7F  | ACACTCTTCCCTACACGACGCTCTCCGATCTgctta                                    | Adapter                    | gctta    |
| ApeK1Y_B8F  | ACACTCTTCCCTACACGACGCTCTCCGATCTggtgt                                    | Adapter                    | ggtgt    |
| ApeK1Y_B9F  | ACACTCTTCCCTACACGACGCTCTCCGATCTggtgt                                    | Adapter                    | ggtgt    |
| ApeK1Y_B10F | ACACTCTTCCCTACACGACGCTCTCCGATCTccagct                                   | Adapter                    | ccagct   |
| ApeK1Y_B11F | ACACTCTTCCCTACACGACGCTCTCCGATCTtcaga                                    | Adapter                    | ttcaga   |
| ApeK1Y_B12F | ACACTCTTCCCTACACGACGCTCTCCGATCTtaggaa                                   | Adapter                    | taggaa   |
| ApeK1Y_C1F  | ACACTCTTCCCTACACGACGCTCTCCGATCTgctcta                                   | Adapter                    | gctcta   |
| ApeK1Y_C2F  | ACACTCTTCCCTACACGACGCTCTCCGATCTccacaa                                   | Adapter                    | ccacaa   |
| ApeK1Y_C3F  | ACACTCTTCCCTACACGACGCTCTCCGATCTctcca                                    | Adapter                    | ctcca    |
| ApeK1Y_C4F  | ACACTCTTCCCTACACGACGCTCTCCGATCTgagata                                   | Adapter                    | gagata   |
| ApeK1Y_C5F  | ACACTCTTCCCTACACGACGCTCTCCGATCTatgctt                                   | Adapter                    | atgctt   |
| ApeK1Y_C6F  | ACACTCTTCCCTACACGACGCTCTCCGATCTagtgga                                   | Adapter                    | agtgga   |
| ApeK1Y_C7F  | ACACTCTTCCCTACACGACGCTCTCCGATCTtattttt                                  | Adapter                    | tattttt  |
| ApeK1Y_C8F  | ACACTCTTCCCTACACGACGCTCTCCGATCTcttgctt                                  | Adapter                    | cttgctt  |
| ApeK1Y_C9F  | ACACTCTTCCCTACACGACGCTCTCCGATCTatgaaaac                                 | Adapter                    | atgaaaac |
| ApeK1Y_C10F | ACACTCTTCCCTACACGACGCTCTCCGATCTaaaagtt                                  | Adapter                    | aaaagtt  |
| ApeK1Y_C11F | ACACTCTTCCCTACACGACGCTCTCCGATCTgaattca                                  | Adapter                    | gaattca  |
| ApeK1Y_C12F | ACACTCTTCCCTACACGACGCTCTCCGATCTgaacttc                                  | Adapter                    | gaacttc  |
| ApeK1Y_D1F  | ACACTCTTCCCTACACGACGCTCTCCGATCTggacctta                                 | Adapter                    | ggacctta |
| ApeK1Y_D2F  | ACACTCTTCCCTACACGACGCTCTCCGATCTgtcgatt                                  | Adapter                    | gtcgatt  |
| ApeK1Y_D3F  | ACACTCTTCCCTACACGACGCTCTCCGATCTaacgcct                                  | Adapter                    | aacgcct  |
| ApeK1Y_D4F  | ACACTCTTCCCTACACGACGCTCTCCGATCTaatatgc                                  | Adapter                    | aatatgc  |
| ApeK1Y_D5F  | ACACTCTTCCCTACACGACGCTCTCCGATCTacgactac                                 | Adapter                    | acgactac |

|             |                                            |         |          |
|-------------|--------------------------------------------|---------|----------|
| ApeK1Y_D6F  | ACACTTTTCCCTACACGACGCTCTCCGATCTtagcatgc    | Adapter | tagcatgc |
| ApeK1Y_D7F  | ACACTTTTCCCTACACGACGCTCTCCGATCTtaggccat    | Adapter | taggccat |
| ApeK1Y_D8F  | ACACTTTTCCCTACACGACGCTCTCCGATCTtgcaagga    | Adapter | tgcaagga |
| ApeK1Y_D9F  | ACACTTTTCCCTACACGACGCTCTCCGATCTtggtacgt    | Adapter | tggtacgt |
| ApeK1Y_D10F | ACACTTTTCCCTACACGACGCTCTCCGATCTtctcagtc    | Adapter | tctcagtc |
| ApeK1Y_D11F | ACACTTTTCCCTACACGACGCTCTCCGATCTccggatat    | Adapter | ccggatat |
| ApeK1Y_D12F | ACACTTTTCCCTACACGACGCTCTCCGATCTcgccttat    | Adapter | cgccttat |
| ApeK1Y_E1F  | ACACTTTTCCCTACACGACGCTCTCCGATCTaggc        | Adapter | aggc     |
| ApeK1Y_E2F  | ACACTTTTCCCTACACGACGCTCTCCGATCTgatc        | Adapter | gatc     |
| ApeK1Y_E3F  | ACACTTTTCCCTACACGACGCTCTCCGATCTtcac        | Adapter | tcac     |
| ApeK1Y_E4F  | ACACTTTTCCCTACACGACGCTCTCCGATCTaggat       | Adapter | aggat    |
| ApeK1Y_E5F  | ACACTTTTCCCTACACGACGCTCTCCGATCTattga       | Adapter | attga    |
| ApeK1Y_E6F  | ACACTTTTCCCTACACGACGCTCTCCGATCTcatct       | Adapter | catct    |
| ApeK1Y_E7F  | ACACTTTTCCCTACACGACGCTCTCCGATCTcctac       | Adapter | cctac    |
| ApeK1Y_E8F  | ACACTTTTCCCTACACGACGCTCTCCGATCTgagga       | Adapter | gagga    |
| ApeK1Y_E9F  | ACACTTTTCCCTACACGACGCTCTCCGATCTggaac       | Adapter | ggaac    |
| ApeK1Y_E10F | ACACTTTTCCCTACACGACGCTCTCCGATCTgtcaa       | Adapter | gtcaa    |
| ApeK1Y_E11F | ACACTTTTCCCTACACGACGCTCTCCGATCTtaata       | Adapter | taata    |
| ApeK1Y_E12F | ACACTTTTCCCTACACGACGCTCTCCGATCTtacet       | Adapter | tacet    |
| ApeK1Y_F1F  | ACACTTTTCCCTACACGACGCTCTCCGATCTtcgtt       | Adapter | tcgtt    |
| ApeK1Y_F2F  | ACACTTTTCCCTACACGACGCTCTCCGATCTacctaa      | Adapter | acctaa   |
| ApeK1Y_F3F  | ACACTTTTCCCTACACGACGCTCTCCGATCTatatgt      | Adapter | atatgt   |
| ApeK1Y_F4F  | ACACTTTTCCCTACACGACGCTCTCCGATCTatcgta      | Adapter | atcgta   |
| ApeK1Y_F5F  | ACACTTTTCCCTACACGACGCTCTCCGATCTcatcgt      | Adapter | catcgt   |
| ApeK1Y_F6F  | ACACTTTTCCCTACACGACGCTCTCCGATCTcgcggt      | Adapter | cgcggt   |
| ApeK1Y_F7F  | ACACTTTTCCCTACACGACGCTCTCCGATCTctatta      | Adapter | ctatta   |
| ApeK1Y_F8F  | ACACTTTTCCCTACACGACGCTCTCCGATCTgccagt      | Adapter | gccagt   |
| ApeK1Y_F9F  | ACACTTTTCCCTACACGACGCTCTCCGATCTggaaga      | Adapter | ggaaga   |
| ApeK1Y_F10F | ACACTTTTCCCTACACGACGCTCTCCGATCTgtactt      | Adapter | gtactt   |
| ApeK1Y_F11F | ACACTTTTCCCTACACGACGCTCTCCGATCTgttgaa      | Adapter | gttgaa   |
| ApeK1Y_F12F | ACACTTTTCCCTACACGACGCTCTCCGATCTtaacga      | Adapter | taacga   |
| ApeK1Y_G1F  | ACACTTTTCCCTACACGACGCTCTCCGATCTggcta       | Adapter | ggcta    |
| ApeK1Y_G2F  | ACACTTTTCCCTACACGACGCTCTCCGATCTacgtgtt     | Adapter | acgtgtt  |
| ApeK1Y_G3F  | ACACTTTTCCCTACACGACGCTCTCCGATCTattaatt     | Adapter | attaatt  |
| ApeK1Y_G4F  | ACACTTTTCCCTACACGACGCTCTCCGATCTattggat     | Adapter | attggat  |
| ApeK1Y_G5F  | ACACTTTTCCCTACACGACGCTCTCCGATCTcataagt     | Adapter | cataagt  |
| ApeK1Y_G6F  | ACACTTTTCCCTACACGACGCTCTCCGATCTcgctgat     | Adapter | cgctgat  |
| ApeK1Y_G7F  | ACACTTTTCCCTACACGACGCTCTCCGATCTcggtaga     | Adapter | cggtaga  |
| ApeK1Y_G8F  | ACACTTTTCCCTACACGACGCTCTCCGATCTctacgga     | Adapter | ctacgga  |
| ApeK1Y_G9F  | ACACTTTTCCCTACACGACGCTCTCCGATCTgcggaat     | Adapter | gcggaat  |
| ApeK1Y_G10F | ACACTTTTCCCTACACGACGCTCTCCGATCTtagcggga    | Adapter | tagcggga |
| ApeK1Y_G11F | ACACTTTTCCCTACACGACGCTCTCCGATCTtcaaga      | Adapter | tcaaga   |
| ApeK1Y_G12F | ACACTTTTCCCTACACGACGCTCTCCGATCTtctgtga     | Adapter | tctgtga  |
| ApeK1Y_H1F  | ACACTTTTCCCTACACGACGCTCTCCGATCTtgctgga     | Adapter | tgctgga  |
| ApeK1Y_H2F  | ACACTTTTCCCTACACGACGCTCTCCGATCTaaccgaga    | Adapter | aaccgaga |
| ApeK1Y_H3F  | ACACTTTTCCCTACACGACGCTCTCCGATCTacagggaa    | Adapter | acagggaa |
| ApeK1Y_H4F  | ACACTTTTCCCTACACGACGCTCTCCGATCTacgtggta    | Adapter | acgtggta |
| ApeK1Y_H5F  | ACACTTTTCCCTACACGACGCTCTCCGATCTccatgggt    | Adapter | ccatgggt |
| ApeK1Y_H6F  | ACACTTTTCCCTACACGACGCTCTCCGATCTcgcggaga    | Adapter | cgcggaga |
| ApeK1Y_H7F  | ACACTTTTCCCTACACGACGCTCTCCGATCTcgtgtggt    | Adapter | cgtgtggt |
| ApeK1Y_H8F  | ACACTTTTCCCTACACGACGCTCTCCGATCTgctgtgga    | Adapter | gctgtgga |
| ApeK1Y_H9F  | ACACTTTTCCCTACACGACGCTCTCCGATCTggattggt    | Adapter | ggattggt |
| ApeK1Y_H10F | ACACTTTTCCCTACACGACGCTCTCCGATCTgtgagggt    | Adapter | gtgagggt |
| ApeK1Y_H11F | ACACTTTTCCCTACACGACGCTCTCCGATCTtatcggga    | Adapter | tatcggga |
| ApeK1Y_H12F | ACACTTTTCCCTACACGACGCTCTCCGATCTtctcggga    | Adapter | tctcggga |
| ApeK1Y_A1R  | pCWGggagAGATCGGAAGAGCGGTTCCAGCAGGAATGCCGAG | Adapter | NA       |
| ApeK1Y_A2R  | pCWGtgcaAGATCGGAAGAGCGGTTCCAGCAGGAATGCCGAG | Adapter | NA       |
| ApeK1Y_A3R  | pCWGtagtAGATCGGAAGAGCGGTTCCAGCAGGAATGCCGAG | Adapter | NA       |

|             |                                                |         |    |
|-------------|------------------------------------------------|---------|----|
| ApeK1Y_A4R  | pCWGtctgAGATCGGAAGAGCGGTTTCAGCAGGAATGCCGAG     | Adapter | NA |
| ApeK1Y_A5R  | pCWGagttAGATCGGAAGAGCGGTTTCAGCAGGAATGCCGAG     | Adapter | NA |
| ApeK1Y_A6R  | pCWGagcgAGATCGGAAGAGCGGTTTCAGCAGGAATGCCGAG     | Adapter | NA |
| ApeK1Y_A7R  | pCWGatcgAGATCGGAAGAGCGGTTTCAGCAGGAATGCCGAG     | Adapter | NA |
| ApeK1Y_A8R  | pCWGttacAGATCGGAAGAGCGGTTTCAGCAGGAATGCCGAG     | Adapter | NA |
| ApeK1Y_A9R  | pCWGtccaAGATCGGAAGAGCGGTTTCAGCAGGAATGCCGAG     | Adapter | NA |
| ApeK1Y_A10R | pCWGaagcgAGATCGGAAGAGCGGTTTCAGCAGGAATGCCGAG    | Adapter | NA |
| ApeK1Y_A11R | pCWGggtgaAGATCGGAAGAGCGGTTTCAGCAGGAATGCCGAG    | Adapter | NA |
| ApeK1Y_A12R | pCWGgtagAGATCGGAAGAGCGGTTTCAGCAGGAATGCCGAG     | Adapter | NA |
| ApeK1Y_B1R  | pCWGttgtAGATCGGAAGAGCGGTTTCAGCAGGAATGCCGAG     | Adapter | NA |
| ApeK1Y_B2R  | pCWGgagaaAGATCGGAAGAGCGGTTTCAGCAGGAATGCCGAG    | Adapter | NA |
| ApeK1Y_B3R  | pCWGgggctAGATCGGAAGAGCGGTTTCAGCAGGAATGCCGAG    | Adapter | NA |
| ApeK1Y_B4R  | pCWGaatacAGATCGGAAGAGCGGTTTCAGCAGGAATGCCGAG    | Adapter | NA |
| ApeK1Y_B5R  | pCWGtacagAGATCGGAAGAGCGGTTTCAGCAGGAATGCCGAG    | Adapter | NA |
| ApeK1Y_B6R  | pCWGacggtAGATCGGAAGAGCGGTTTCAGCAGGAATGCCGAG    | Adapter | NA |
| ApeK1Y_B7R  | pCWGtaagcAGATCGGAAGAGCGGTTTCAGCAGGAATGCCGAG    | Adapter | NA |
| ApeK1Y_B8R  | pCWGacaccAGATCGGAAGAGCGGTTTCAGCAGGAATGCCGAG    | Adapter | NA |
| ApeK1Y_B9R  | pCWGacaaccAGATCGGAAGAGCGGTTTCAGCAGGAATGCCGAG   | Adapter | NA |
| ApeK1Y_B10R | pCWGagctggAGATCGGAAGAGCGGTTTCAGCAGGAATGCCGAG   | Adapter | NA |
| ApeK1Y_B11R | pCWGtctgaaAGATCGGAAGAGCGGTTTCAGCAGGAATGCCGAG   | Adapter | NA |
| ApeK1Y_B12R | pCWGttcctaAGATCGGAAGAGCGGTTTCAGCAGGAATGCCGAG   | Adapter | NA |
| ApeK1Y_C1R  | pCWGtagagcAGATCGGAAGAGCGGTTTCAGCAGGAATGCCGAG   | Adapter | NA |
| ApeK1Y_C2R  | pCWGttgtgAGATCGGAAGAGCGGTTTCAGCAGGAATGCCGAG    | Adapter | NA |
| ApeK1Y_C3R  | pCWGtgaagAGATCGGAAGAGCGGTTTCAGCAGGAATGCCGAG    | Adapter | NA |
| ApeK1Y_C4R  | pCWGtatctcAGATCGGAAGAGCGGTTTCAGCAGGAATGCCGAG   | Adapter | NA |
| ApeK1Y_C5R  | pCWGaggcatAGATCGGAAGAGCGGTTTCAGCAGGAATGCCGAG   | Adapter | NA |
| ApeK1Y_C6R  | pCWGtccactAGATCGGAAGAGCGGTTTCAGCAGGAATGCCGAG   | Adapter | NA |
| ApeK1Y_C7R  | pCWGaaaaataAGATCGGAAGAGCGGTTTCAGCAGGAATGCCGAG  | Adapter | NA |
| ApeK1Y_C8R  | pCWGaagcaagAGATCGGAAGAGCGGTTTCAGCAGGAATGCCGAG  | Adapter | NA |
| ApeK1Y_C9R  | pCWGgtttcatAGATCGGAAGAGCGGTTTCAGCAGGAATGCCGAG  | Adapter | NA |
| ApeK1Y_C10R | pCWGaaacttttAGATCGGAAGAGCGGTTTCAGCAGGAATGCCGAG | Adapter | NA |
| ApeK1Y_C11R | pCWGtgaattcAGATCGGAAGAGCGGTTTCAGCAGGAATGCCGAG  | Adapter | NA |
| ApeK1Y_C12R | pCWGgaagttcAGATCGGAAGAGCGGTTTCAGCAGGAATGCCGAG  | Adapter | NA |
| ApeK1Y_D1R  | pCWGtaggtccAGATCGGAAGAGCGGTTTCAGCAGGAATGCCGAG  | Adapter | NA |
| ApeK1Y_D2R  | pCWGaatcgacAGATCGGAAGAGCGGTTTCAGCAGGAATGCCGAG  | Adapter | NA |
| ApeK1Y_D3R  | pCWGaggcgttAGATCGGAAGAGCGGTTTCAGCAGGAATGCCGAG  | Adapter | NA |
| ApeK1Y_D4R  | pCWGgcatattAGATCGGAAGAGCGGTTTCAGCAGGAATGCCGAG  | Adapter | NA |
| ApeK1Y_D5R  | pCWGgtagtctAGATCGGAAGAGCGGTTTCAGCAGGAATGCCGAG  | Adapter | NA |
| ApeK1Y_D6R  | pCWGgcatgctaAGATCGGAAGAGCGGTTTCAGCAGGAATGCCGAG | Adapter | NA |
| ApeK1Y_D7R  | pCWGatggcctaAGATCGGAAGAGCGGTTTCAGCAGGAATGCCGAG | Adapter | NA |
| ApeK1Y_D8R  | pCWGtcttgcaAGATCGGAAGAGCGGTTTCAGCAGGAATGCCGAG  | Adapter | NA |
| ApeK1Y_D9R  | pCWGgactaccaAGATCGGAAGAGCGGTTTCAGCAGGAATGCCGAG | Adapter | NA |
| ApeK1Y_D10R | pCWGgactgagaAGATCGGAAGAGCGGTTTCAGCAGGAATGCCGAG | Adapter | NA |
| ApeK1Y_D11R | pCWGataccggAGATCGGAAGAGCGGTTTCAGCAGGAATGCCGAG  | Adapter | NA |
| ApeK1Y_D12R | pCWGataagcgAGATCGGAAGAGCGGTTTCAGCAGGAATGCCGAG  | Adapter | NA |
| ApeK1Y_E1R  | pCWGgcctAGATCGGAAGAGCGGTTTCAGCAGGAATGCCGAG     | Adapter | NA |
| ApeK1Y_E2R  | pCWGgatcAGATCGGAAGAGCGGTTTCAGCAGGAATGCCGAG     | Adapter | NA |
| ApeK1Y_E3R  | pCWGgtgaAGATCGGAAGAGCGGTTTCAGCAGGAATGCCGAG     | Adapter | NA |
| ApeK1Y_E4R  | pCWGatcctAGATCGGAAGAGCGGTTTCAGCAGGAATGCCGAG    | Adapter | NA |
| ApeK1Y_E5R  | pCWGtcaatAGATCGGAAGAGCGGTTTCAGCAGGAATGCCGAG    | Adapter | NA |
| ApeK1Y_E6R  | pCWGgatgAGATCGGAAGAGCGGTTTCAGCAGGAATGCCGAG     | Adapter | NA |
| ApeK1Y_E7R  | pCWGgttaggAGATCGGAAGAGCGGTTTCAGCAGGAATGCCGAG   | Adapter | NA |
| ApeK1Y_E8R  | pCWGtctcAGATCGGAAGAGCGGTTTCAGCAGGAATGCCGAG     | Adapter | NA |
| ApeK1Y_E9R  | pCWGgttccAGATCGGAAGAGCGGTTTCAGCAGGAATGCCGAG    | Adapter | NA |
| ApeK1Y_E10R | pCWGttgacAGATCGGAAGAGCGGTTTCAGCAGGAATGCCGAG    | Adapter | NA |
| ApeK1Y_E11R | pCWGtattaAGATCGGAAGAGCGGTTTCAGCAGGAATGCCGAG    | Adapter | NA |
| ApeK1Y_E12R | pCWGatgtaAGATCGGAAGAGCGGTTTCAGCAGGAATGCCGAG    | Adapter | NA |
| ApeK1Y_F1R  | pCWGaacgaAGATCGGAAGAGCGGTTTCAGCAGGAATGCCGAG    | Adapter | NA |

|             |                                                 |         |    |
|-------------|-------------------------------------------------|---------|----|
| ApeK1Y_F2R  | pCWGtttagtAGATCGGAAGAGCGGTTTCAGCAGGAATGCCGAG    | Adapter | NA |
| ApeK1Y_F3R  | pCWGacatatAGATCGGAAGAGCGGTTTCAGCAGGAATGCCGAG    | Adapter | NA |
| ApeK1Y_F4R  | pCWGtacgatAGATCGGAAGAGCGGTTTCAGCAGGAATGCCGAG    | Adapter | NA |
| ApeK1Y_F5R  | pCWGacgatgAGATCGGAAGAGCGGTTTCAGCAGGAATGCCGAG    | Adapter | NA |
| ApeK1Y_F6R  | pCWGaccgagAGATCGGAAGAGCGGTTTCAGCAGGAATGCCGAG    | Adapter | NA |
| ApeK1Y_F7R  | pCWGtaaatgAGATCGGAAGAGCGGTTTCAGCAGGAATGCCGAG    | Adapter | NA |
| ApeK1Y_F8R  | pCWGactggcAGATCGGAAGAGCGGTTTCAGCAGGAATGCCGAG    | Adapter | NA |
| ApeK1Y_F9R  | pCWGtcttccAGATCGGAAGAGCGGTTTCAGCAGGAATGCCGAG    | Adapter | NA |
| ApeK1Y_F10R | pCWGgaagtagAGATCGGAAGAGCGGTTTCAGCAGGAATGCCGAG   | Adapter | NA |
| ApeK1Y_F11R | pCWGttcaacAGATCGGAAGAGCGGTTTCAGCAGGAATGCCGAG    | Adapter | NA |
| ApeK1Y_F12R | pCWGtctgtaAGATCGGAAGAGCGGTTTCAGCAGGAATGCCGAG    | Adapter | NA |
| ApeK1Y_G1R  | pCWGtagccaAGATCGGAAGAGCGGTTTCAGCAGGAATGCCGAG    | Adapter | NA |
| ApeK1Y_G2R  | pCWGaacacgtAGATCGGAAGAGCGGTTTCAGCAGGAATGCCGAG   | Adapter | NA |
| ApeK1Y_G3R  | pCWGaatcaatAGATCGGAAGAGCGGTTTCAGCAGGAATGCCGAG   | Adapter | NA |
| ApeK1Y_G4R  | pCWGatccaatAGATCGGAAGAGCGGTTTCAGCAGGAATGCCGAG   | Adapter | NA |
| ApeK1Y_G5R  | pCWGacttatgAGATCGGAAGAGCGGTTTCAGCAGGAATGCCGAG   | Adapter | NA |
| ApeK1Y_G6R  | pCWGatcagcgAGATCGGAAGAGCGGTTTCAGCAGGAATGCCGAG   | Adapter | NA |
| ApeK1Y_G7R  | pCWGtctaccgAGATCGGAAGAGCGGTTTCAGCAGGAATGCCGAG   | Adapter | NA |
| ApeK1Y_G8R  | pCWGtccgtagAGATCGGAAGAGCGGTTTCAGCAGGAATGCCGAG   | Adapter | NA |
| ApeK1Y_G9R  | pCWGattccgcAGATCGGAAGAGCGGTTTCAGCAGGAATGCCGAG   | Adapter | NA |
| ApeK1Y_G10R | pCWGtccgctaAGATCGGAAGAGCGGTTTCAGCAGGAATGCCGAG   | Adapter | NA |
| ApeK1Y_G11R | pCWGtcttccaAGATCGGAAGAGCGGTTTCAGCAGGAATGCCGAG   | Adapter | NA |
| ApeK1Y_G12R | pCWGtccacagaAGATCGGAAGAGCGGTTTCAGCAGGAATGCCGAG  | Adapter | NA |
| ApeK1Y_H1R  | pCWGtccagcaAGATCGGAAGAGCGGTTTCAGCAGGAATGCCGAG   | Adapter | NA |
| ApeK1Y_H2R  | pCWGtctcggttAGATCGGAAGAGCGGTTTCAGCAGGAATGCCGAG  | Adapter | NA |
| ApeK1Y_H3R  | pCWGttccctgtAGATCGGAAGAGCGGTTTCAGCAGGAATGCCGAG  | Adapter | NA |
| ApeK1Y_H4R  | pCWGtaccacgtAGATCGGAAGAGCGGTTTCAGCAGGAATGCCGAG  | Adapter | NA |
| ApeK1Y_H5R  | pCWGaccatggAGATCGGAAGAGCGGTTTCAGCAGGAATGCCGAG   | Adapter | NA |
| ApeK1Y_H6R  | pCWGtctccgagAGATCGGAAGAGCGGTTTCAGCAGGAATGCCGAG  | Adapter | NA |
| ApeK1Y_H7R  | pCWGaccacagcAGATCGGAAGAGCGGTTTCAGCAGGAATGCCGAG  | Adapter | NA |
| ApeK1Y_H8R  | pCWGtccacagcAGATCGGAAGAGCGGTTTCAGCAGGAATGCCGAG  | Adapter | NA |
| ApeK1Y_H9R  | pCWGaccaatccAGATCGGAAGAGCGGTTTCAGCAGGAATGCCGAG  | Adapter | NA |
| ApeK1Y_H10R | pCWGaccctcacAGATCGGAAGAGCGGTTTCAGCAGGAATGCCGAG  | Adapter | NA |
| ApeK1Y_H11R | pCWGtcccagataAGATCGGAAGAGCGGTTTCAGCAGGAATGCCGAG | Adapter | NA |
| ApeK1Y_H12R | pCWGtccaggaaAGATCGGAAGAGCGGTTTCAGCAGGAATGCCGAG  | Adapter | NA |
