# Supplementary material for: Genome Assembly Improvement and Mapping Convergently Evolved Skeletal Traits in Sticklebacks with Genotyping-by-Sequencing
Source: Oxford University Press journal article supplement (doi:10.1534/g3.115.017905), 2015-06-05
Supplement: 017905_tables2.pdf [file 017905_tables2.pdf]

**Table S2 Cross summary statistics.** Numbers of initial samples, dropped samples due to low coverage, and final samples are presented. Numbers of initial markers, dropped markers due to low coverage and skewed allele ratios, and final markers are presented. GP=grandparent. Genotype fail % = percentage of missing genotypes.

| Cross | GP SNPs   | F2 SNPs used | Samples |              |       | Markers |              |                     |       | SNP Coverage | Marker Coverage | Genotype Fail % |
|-------|-----------|--------------|---------|--------------|-------|---------|--------------|---------------------|-------|--------------|-----------------|-----------------|
|       |           |              | Initial | Low coverage | Final | Initial | Low coverage | Skewed allele ratio | Final |              |                 |                 |
| FTC   | 1,116,087 | 131,091      | 358     | 2            | 356   | 1,085   | 59           | 25                  | 1,001 | 1.63X        | 197X            | 1.9             |
| BEPA  | 715,279   | 87,419       | 361     | 2            | 359   | 1,077   | 39           | 60                  | 978   | 1.73X        | 140X            | 1.8             |
