# Supplementary material for: Genome Assembly Improvement and Mapping Convergently Evolved Skeletal Traits in Sticklebacks with Genotyping-by-Sequencing
Source: Oxford University Press journal article supplement (doi:10.1534/g3.115.017905), 2015-06-05
Supplement: 017905_tables3.pdf [file 017905_tables3.pdf]

**Table S3 Anchored scaffolds**

Details of 538 scaffolds that are linked to a chromosome. Some of these scaffolds were mapped in the core FTC and/or BEPA maps—the centiMorgan (cM) range and orientation (if known) of these scaffolds is shown under “Map cM”. A further approach (see Methods) used read correlations to anchor additional scaffolds. For scaffolds anchored with this approach, the cM position of the highest correlating marker in the core map is presented under “RC cM”. “Markers” indicates the number of binned markers in the scaffold.

| Scaffold | Original location |                   |            | Revised location |             |         | FTC Cross |           |       | BEPA Cross |            |       | Note |
|----------|-------------------|-------------------|------------|------------------|-------------|---------|-----------|-----------|-------|------------|------------|-------|------|
|          | Chr               | Position          | Length     | Chr              | Orientation | Markers | SNPs      | Map cM    | RC cM | SNPs       | Map cM     | RC cM |      |
| 0        | 2                 | 966608-22375856   | 21,409,249 | 2                | Forward     | 43      | 5,763     | 1.0-76.4  | 27.6  | 3,803      | 3.4-92.2   | 37.9  |      |
| 1        | 7                 | 10411930-27613546 | 17,201,617 | 7                | Forward     | 35      | 9,402     | 48.8-95.1 | 50.1  | 6,263      | 69.7-122.1 | 74.1  |      |
| 2        | 20                | 834142-17950836   | 17,116,695 | 20               | Reverse     | 35      | 7,599     | 21.6-74.6 | 73.3  | 4,465      | 29.4-91.6  | 64.9  |      |
| 3        | 19                | 3824254-20240660  | 16,416,407 | 19               | Reverse     | 33      | 5,191     | 41.5-74.3 | 43.9  | 2,541      | 55.2-89.5  | 61.7  |      |
| 4        | 13                | 2825158-18481171  | 15,656,014 | 13               | Forward     | 32      | 3,748     | 3.5-39.2  | 21.1  | 2,810      | 12.5-54.5  | 29.7  |      |
| 5        | 10                | 1-14541209        | 14,541,209 | 10               | Forward     | 30      | 2,971     | 0.0-62.2  | 25.3  | 3,081      | 6.1-83.9   | 32    |      |
| 6        | 12                | 2209412-16547614  | 14,338,203 | 12               | Reverse     | 29      | 5,301     | 46.0-68.0 | 66.5  | 3,554      | 52.4-79.2  | 53.1  |      |
| 7        | 1                 | 5935398-19921301  | 13,985,904 | 1                | Forward     | 28      | 10,293    | 47.7-54.1 | 51.2  | 2,876      | 53.0-73.8  | 73.8  |      |
| 8        | 9                 | 4309200-17894190  | 13,584,991 | 9                | Reverse     | 28      | 3,359     | 20.5-47.2 | 20.5  | 3,242      | 35.2-70.0  | 41.8  |      |
| 9        | 8                 | 4501841-18121348  | 13,619,508 | 8                | Forward     | 28      | 5,214     | 22.8-60.8 | 29.5  | 3,390      | 30.0-77.2  | 37.4  |      |
| 10       | 15                | 1070869-14379835  | 13,308,967 | 15               | Forward     | 27      | 1,814     | 20.8-65.3 | 53.5  | 1,975      | 18.5-71.1  | 56.1  |      |
| 11       | 11                | 2205540-15151913  | 12,946,374 | 11               | Forward     | 26      | 5,117     | 3.2-40.5  | 15.1  | 4,125      | 8.6-57.8   | 25.8  |      |
| 12       | 14                | 346722-13082935   | 12,736,214 | 14               | Forward     | 26      | 1,560     | 6.7-67.0  | 64.7  | 1,860      | 5.6-62.6   | 49.8  |      |
| 13       | 6                 | 4057780-16417534  | 12,359,755 | 6                | Forward     | 25      | 2,362     | 10.7-54.3 | 18.9  | 1,804      | 23.3-74.4  | 31.9  |      |
| 14       | 16                | 5282403-16168747  | 10,886,345 | 16               | Forward     | 22      | 2,851     | 21.9-38.1 | 30    | 1,679      | 26.9-51.3  | 51.3  |      |
| 15       | 3                 | 3269601-14097026  | 10,827,426 | 3                | Forward     | 22      | 1,875     | 12.8-31.8 | 17.5  | 1,628      | 22.8-41.8  | 28.8  |      |
| 16       | 21                | 298071-9494732    | 9,196,662  | 21               | Forward     | 19      | 6,476     | 10.9-23.2 | 11.6  | 4,166      | 13.0-28.2  | 17.9  |      |
| 17       | 4                 | 9036585-17819056  | 8,782,472  | 4                | Forward     | 18      | 6,266     | 51.6-58.6 | 58.1  | 3,651      | 49.5-63.1  | 62.8  |      |
| 18       | 17                | 6449158-14603141  | 8,153,984  | 17               | Forward     | 17      | 1,542     | 34.2-69.1 | 69.1  | 1,218      | 53.6-101.8 | 53.6  |      |
| 19       | 5                 | 1-7877689         | 7,877,689  | 5                | Reverse     | 16      | 2,242     | 6.0-19.3  | 11.1  | 1,534      | 12.9-25.3  | 14.4  |      |
| 20       | 4                 | 1174335-9035584   | 7,861,250  | 4                | Forward     | 16      | 2,790     | 7.6-51.5  | 51.6  | 1,760      | 8.6-49.3   | 49.3  |      |
| 21       | 18                | 4823595-12228020  | 7,404,426  | 18               | Forward     | 15      | 1,065     | 17.1-29.6 | 28.5  | 928        | 28.2-43.0  | 28.5  |      |
| 22       | 1                 | 19922302-27290228 | 7,367,927  | 1                | Reverse     | 15      | 2,431     | 52.0-71.6 | 58.4  | 2,239      | 75.1-104.9 | 91.2  |      |
| 23       | 7                 | 4609159-10410929  | 5,801,771  | 7                | Forward     | 12      | 3,917     | 45.4-48.8 | 48.5  | 1,652      | 63.7-69.3  | 69.1  |      |
| 24       | 4                 | 22731829-28355687 | 5,623,859  | 4                | Reverse     | 12      | 3,876     | 58.8-59.2 | 59.1  | 2,145      | 63.8-67.5  | 66.7  |      |
| 25       | 17                | 936214-6448157    | 5,511,944  | 17               | Forward     | 12      | 938       | 11.5-33.6 | 32.7  | 1,007      | 17.7-52.8  | 39.6  |      |
| 26       | 16                | 1-5281402         | 5,281,402  | 16               | Forward     | 11      | 743       | 0.0-20.8  | 1.3   | 920        | 0.0-25.2   | 9.5   |      |
| 27       | Un                | 1-5105261         | 5,105,261  | 17               | Reverse     | 11      | 2,806     | 33.4-34.3 | 34.2  | 329        | 52.7-53.8  | 53.6  |      |
| 28       | 4                 | 17820057-22730828 | 4,910,772  | 4                | Reverse     | 10      | 3,585     | 59.2-60.7 | 59.3  | 2,177      | 67.3-71.1  | 68.5  |      |
| 29       | 18                | 1-4822594         | 4,822,594  | 18               | Forward     | 10      | 738       | 0.0-17.1  | 17.1  | 816        | 0.0-28.5   | 28.5  |      |
| 30       | 1                 | 1545350-5934397   | 4,389,048  | 1                | Forward     | 9       | 654       | 18.8-46.4 | 45    | 928        | 20.9-52.3  | 49.2  |      |
| 31       | 9                 | 1-4308199         | 4,308,199  | 9                | Forward     | 9       | 558       | 0.0-20.3  | 20.3  | 644        | 0.0-35.4   | 35.2  |      |
| 32       | 18                | 12229021-15990693 | 3,761,673  | 18               | Forward     | 8       | 711       | 30.8-64.0 | 45.6  | 775        | 44.5-81.3  | 81.3  |      |
| 33       | 3                 | 1-3268600         | 3,268,600  | 3                | Forward     | 7       | 488       | 0.0-13.1  | 0     | 543        | 0.0-22.3   | 22.3  |      |
| 34       | 19                | 530650-3823253    | 3,292,604  | 19               | Forward     | 7       | 561       | 10.3-41.6 | 41.6  | 598        | 11.7-55.4  | 19.1  |      |
| 35       | 6                 | 885756-4056779    | 3,171,024  | 6                | Reverse     | 7       | 359       | 2.8-8.5   | 3     | 551        | 12.3-21.8  | 17.6  |      |
| 36       | 8                 | 1371557-4500840   | 3,129,284  | 8                | Forward     | 7       | 599       | 6.6-22.3  | 18.6  | 730        | 7.4-28.5   | 22.9  |      |
| 37       | Un                | 5106262-7754674   | 2,648,413  | 21               | Forward     | 6       | 1,721     | 11.7-12.0 | 11.8  | 1,187      | 10.1-12.6  | 11.5  |      |
| 38       | 5                 | 7878690-10536132  | 2,657,443  | 5                | Forward     | 6       | 376       | 22.8-38.3 | 28.9  | 558        | 29.0-50.0  | 34.7  |      |

|    |    |                   |           |    |         |   |     |           |      |     |             |       |
|----|----|-------------------|-----------|----|---------|---|-----|-----------|------|-----|-------------|-------|
| 39 | 7  | 2199899-4608158   | 2,408,260 | 7  | Forward | 5 | 360 | 25.5-43.7 | 27.7 | 513 | 37.1-61.8   | 37.1  |
| 40 | 14 | 13083936-15246461 | 2,162,526 | 14 | Reverse | 5 | 303 | 66.5-68.9 | 66.5 | 359 | 64.6-68.9   | 65    |
| 41 | 4  | 30452784-32632948 | 2,180,165 | 4  | Forward | 5 | 407 | 70.6-89.2 | 70.6 | 559 | 86.4-101.2  | 92.9  |
| 42 | 4  | 28356688-30451783 | 2,095,096 | 4  | Forward | 5 | 282 | 61.0-69.0 | 61   | 262 | 72.8-79.8   | 79.8  |
| 43 | 21 | 9495733-11398568  | 1,902,836 | 21 | Forward | 4 | 380 | 27.2-42.2 | 35.6 | 465 | 31.6-47.2   | 36.5  |
| 44 | 16 | 16169748-18115788 | 1,946,041 | 16 | Reverse | 4 | 698 | 56.0-59.4 | 56   | 785 | 58.7-78.3   | 78.3  |
| 45 | 15 | 14380836-16189872 | 1,809,037 | 15 | Reverse | 4 | 280 | 65.0-67.4 | 65.1 | 256 | 70.3-80.4   | 77.5  |
| 46 | 20 | 17951837-19732071 | 1,780,235 | 20 | Forward | 4 | 188 | 74.6-77.0 | 76.5 | 262 | 92.1-94.6   | 92.1  |
| 47 | Un | 7755675-9503854   | 1,748,180 | 7  | Reverse | 4 | 886 | 48.7-48.8 | 48.8 | 578 | 69.4-69.7   | 69.2  |
| 48 | Un | 9504855-11243840  | 1,738,986 | 5  | Forward | 4 | 222 | 1.5-6.0   | 1.5  | 354 | 3.8-12.3    | 9.2   |
| 49 | 11 | 621153-2204539    | 1,583,387 | 11 | Reverse | 4 | 212 | 0.9-1.5   | 0.9  | 204 | 3.0-6.8     | 4.8   |
| 50 | 3  | 15275813-16798506 | 1,522,694 | 3  | Forward | 4 | 173 | 51.6-72.9 | 51.6 | 268 | 63.4-76.8   | 63.4  |
| 51 | 13 | 1-1474264         | 1,474,264 | 13 | Reverse | 3 | 215 | 0.0-0.5   | 0.4  | 249 | 0.0-4.3     | 4.3   |
| 52 | 13 | 1475265-2824157   | 1,348,893 | 13 | Forward | 3 | 197 | 0.7-2.4   | 0.7  | 214 | 4.9-10.3    | 10.3  |
| 53 | 8  | 1-1370556         | 1,370,556 | 8  | Forward | 3 | 170 | 4.6-5.5   | 5    | 216 | 2.4-6.5     | 2.4   |
| 54 | Un | 11244841-12457396 | 1,212,556 | 5  | Forward | 3 | 127 | 0.0-0.6   | 0.6  | 160 | 0.0-2.0     | 2     |
| 55 | 7  | 928259-2198898    | 1,270,640 | 7  | Forward | 3 | 146 | 13.9-22.9 | 13.9 | 221 | 32.6-35.4   | 35.4  |
| 56 | Un | 12458397-13627317 | 1,168,921 | 8  | Forward | 3 | 140 | 0.0-3.5   | 3.5  | 141 | 0.0-0.3     | 0     |
| 57 | 13 | 18482172-19650590 | 1,168,419 | 13 | Reverse | 3 | 198 | 46.9-55.4 | 51.2 | 255 | 60.9-69.6   | 65.9  |
| 58 | Un | 13628318-14738452 | 1,110,135 | 10 | Reverse | 3 | 58  | 2.0-2.9   | 2    | 46  | 3.5         | NA    |
| 59 | 10 | 14542210-15657440 | 1,115,231 | 10 | Forward | 3 | 145 | 63.4-65.2 | 65.2 | 171 | 83.0-85.7   | 85.7  |
| 60 | 12 | 17290519-18401067 | 1,110,549 | 12 | Reverse | 3 | 156 | 70.0-75.2 | 75.2 | 161 | 84.1-88.5   | 87    |
| 61 | Un | 14739453-15741363 | 1,001,911 | 6  | Reverse | 3 | 86  | 0.0-1.2   | 1.2  | 91  | 0.0-3.8     | 0     |
| 62 | 12 | 181397-1246382    | 1,064,986 | 12 | Forward | 3 | 192 | 17.8-26.3 | 17.8 | 173 | 19.9-33.1   | 33.1  |
| 63 | 2  | 1-965607          | 965,607   | 2  | Reverse | 2 | 208 | 0.2-0.8   | 0.2  | 126 | 1.6-2.6     | 2.6   |
| 64 | 12 | 1247383-2208411   | 961,029   | 12 | Forward | 2 | 181 | 41.4-43.7 | 43.7 | 159 | 49.2-50.6   | 50.6  |
| 65 | 4  | 1-1068876         | 1,068,876 | 4  | Forward | 3 | 130 | 0.0-2.8   | 2.8  | 129 | 0.0-3.6     | 3.6   |
| 66 | 6  | 1-884755          | 884,755   | 6  | Reverse | 2 | 137 | 1.7-2.6   | 1.7  | 187 | 6.8-10.9    | 6.8   |
| 67 | Un | 15742364-16635733 | 893,370   | 21 | Forward | 2 | 193 | 47.5-53.9 | 53.9 | 286 | 66          | 66    |
| 68 | Un | 16636734-17505905 | 869,172   | 12 | Forward | 2 | 156 | 37.7-40.3 | 37.7 | 150 | 45.6-47.8   | 45.6  |
| 69 | Un | 17506906-18320481 | 813,576   | 16 | Reverse | 2 | 59  | 68.5-68.8 | 68.5 | 48  | 89.4-89.6   | 89.4  |
| 70 | 12 | 16548615-17289518 | 740,904   | 12 | Reverse | 2 | 104 | 67.8-68.8 | 67.8 | 51  | 80.0-81.3   | 80    |
| 71 | 8  | 18122349-18945509 | 823,161   | 8  | Forward | 2 | 162 | 68.4-71.1 | 68.4 | 150 | 83.9-86.9   | 83.9  |
| 72 | 15 | 342542-1069868    | 727,327   | 15 | Reverse | 2 | 119 | 7.4-13.7  | 7.4  | 173 | 9.0-12.5    | 12.5  |
| 73 | 5  | 10998358-11741737 | 743,380   | 5  | Reverse | 2 | 137 | 48.9-53.9 | 48.9 | 228 | 65.3-70.9   | 70.9  |
| 74 | Un | 18321482-19003903 | 682,422   | 1  | Forward | 2 | 134 | 83.5      | 83.5 | 160 | 111.6-112.8 | 111.6 |
| 75 | 11 | 1-620152          | 620,152   | 11 | Forward | 2 | 71  | 0.8-1.3   | 1.3  | 88  | 1.7-2.4     | 1.7   |
| 76 | Un | 19004904-19601078 | 596,175   | 6  | Reverse | 2 | 36  | 2.9-3.4   | 2.9  | 12  | NA          | NA    |
| 77 | 9  | 17895191-18499799 | 604,609   | 9  | Forward | 2 | 118 | 54.1-56.7 | 56.7 | 151 | 72.7-76.6   | 76.6  |
| 78 | 3  | 14098027-14736947 | 638,921   | 3  | Forward | 2 | 100 | 34.0-34.9 | 34.9 | 124 | 44.1-46.2   | 44.1  |
| 79 | 11 | 15152914-15736674 | 583,761   | 11 | Reverse | 2 | 120 | 49.4-53.4 | 49.4 | 166 | 67.1-70.3   | 67.1  |
| 80 | Un | 19602079-20193314 | 591,236   | 11 | Forward | 2 | 62  | 0.0-0.2   | 0.2  | 44  | 0.0-0.8     | 0     |
| 81 | 3  | 14737948-15274812 | 536,865   | 3  | Forward | 2 | 119 | 42.5-45.1 | 42.5 | 98  | 53.2-57.6   | NA    |
| 82 | 1  | 27586784-28185914 | 599,131   | 1  | Reverse | 2 | 78  | 94.3-95.6 | 94.3 | 75  | 121.1-121.5 | 121.5 |
| 83 | 1  | 1-540082          | 540,082   | 1  | Reverse | 2 | 39  | 0.0-0.7   | 0    | 63  | 0.0-0.1     | 0.3   |
| 84 | Un | 20194315-20757747 | 563,433   | 15 | Forward | 2 | 32  | 67.7-68.4 | 67.7 | 51  | 81.7-82.7   | 81.7  |
| 85 | 19 | 1-529649          | 529,649   | 19 | Forward | 2 | 60  | 0.0-1.4   | 0    | 95  | 0.0-0.8     | 0     |

|     |    |                   |         |    |         |   |     |             |       |     |             |       |
|-----|----|-------------------|---------|----|---------|---|-----|-------------|-------|-----|-------------|-------|
| 86  | 7  | 1-539725          | 539,725 | 7  | Reverse | 2 | 69  | 2.6-3.6     | 3.6   | 76  | 11.5-13.3   | 13.3  |
| 87  | 9  | 19745084-20249479 | 504,396 | 9  | Reverse | 2 | 51  | 76.3-76.9   | 76.3  | 70  | 100.0-103.2 | 100   |
| 88  | Un | 20758748-21267600 | 508,853 | 14 | Reverse | 2 | 51  | 69.6        | 68.3  | 52  | 72.2-73.0   | 72.2  |
| 89  | Un | 21268601-21812334 | 543,734 | 17 | Forward | 2 | 26  | 0.0-0.3     | 0     | 56  | 0           | 0     |
| 90  | Un | 21813335-22322408 | 509,074 | 4  | Reverse | 2 | 14  | 107.3       | 107.3 | 19  | 133.0-135.4 | 133   |
| 91  | 9  | 18500800-19031248 | 530,449 | 9  | Reverse | 2 | 76  | 59.6-61.9   | 59.6  | 85  | 79.2-81.8   | 79.2  |
| 92  | 1  | 541083-1048102    | 507,020 | 1  | Forward | 2 | 76  | 1.4-2.9     | 2.9   | 111 | 0.5-0.9     | 0.3   |
| 93  | 5  | 10537133-10997357 | 460,225 | 5  | Reverse | 2 | 63  | 41.2-43.8   | 43.8  | 105 | 54.3-57.0   | 54.3  |
| 94  | Un | 22323409-22840795 | 517,387 | 21 | Unknown | 2 | 9   | 0           | 0     | 5   | NA          | 10.1  |
| 95  | Un | 22841796-23342223 | 500,428 | 21 | Forward | 2 | 52  | 5.6-7.1     | 7.1   | 56  | 0           | 0     |
| 96  | 2  | 22376857-22828185 | 451,329 | 2  | Reverse | 2 | 36  | 79.8-79.9   | 79.8  | 24  | 95.0-95.6   | 95.6  |
| 97  | 1  | 1049103-1544349   | 495,247 | 1  | Forward | 2 | 72  | 5.2-6.6     | 6.6   | 94  | 3.6-5.3     | 5.3   |
| 98  | Un | 23343224-23754800 | 411,577 | 2  | Reverse | 2 | 43  | 0.0-0.4     | 0     | 55  | 0.0-0.4     | 0     |
| 99  | Un | 23755801-24176448 | 420,648 | 12 | Reverse | 2 | 66  | 28.2-29.6   | 29.6  | 106 | 37.6-40.1   | 37.6  |
| 100 | 11 | 16133022-16562300 | 429,279 | 11 | Reverse | 2 | 58  | 61.5-62.6   | 62.6  | 56  | 81.1-82.2   | 82.2  |
| 101 | Un | 24177449-24562071 | 384,623 | 10 | Reverse | 2 | 22  | 2.0-2.6     | 2.6   | 23  | NA          | 1.8   |
| 102 | 2  | 22829186-23295652 | 466,467 | 2  | Forward | 2 | 69  | 78.2-79.7   | 79.7  | 77  | 94.4-95.3   | 95.3  |
| 103 | 11 | 15737675-16132021 | 394,347 | 11 | Reverse | 2 | 65  | 64.2-64.8   | 64.8  | 17  | 78.6        | 78.6  |
| 104 | 20 | 1-415733          | 415,733 | 20 | Forward | 2 | 99  | 8.9-9.4     | 8.9   | 61  | 5.2-6.0     | 6     |
| 105 | 9  | 19032249-19485083 | 452,835 | 9  | Forward | 2 | 48  | 63.7-64.6   | 63.7  | 76  | 85.1-86.9   | 86.9  |
| 106 | Un | 24563072-24936439 | 373,368 | 7  | Forward | 2 | 77  | 48.7-48.8   | 48.7  | 10  | 69.2-69.8   | 69.2  |
| 107 | 13 | 19651591-20070501 | 418,911 | 13 | Reverse | 2 | 37  | 66.6-68.0   | 68    | 59  | 76.2-79.0   | 79    |
| 108 | Un | 24937440-25286697 | 349,258 | 4  | Reverse | 2 | 16  | 58.7        | 59.1  | 36  | 67.4        | 67.4  |
| 109 | 17 | 1-409613          | 409,613 | 17 | Reverse | 2 | 110 | 0.6-2.0     | 2     | 93  | 1.8-3.0     | 3     |
| 110 | 15 | 1-341541          | 341,541 | 15 | Reverse | 2 | 33  | 0.0-0.3     | 0     | 42  | 0.0-3.6     | 0     |
| 111 | Un | 25287698-25631573 | 343,876 | 10 | Forward | 2 | 40  | 2.0-2.3     | 2     | 61  | 0.0-0.8     | 0.8   |
| 112 | Un | 25632574-25990228 | 357,655 | 5  | Reverse | 2 | 52  | 57.0-57.8   | 57    | 77  | 74.5-76.0   | 74.5  |
| 113 | 7  | 27614547-27937443 | 322,897 | 7  | Forward | 2 | 31  | 97.5-97.9   | 97.5  | 42  | 129.8       | 129.8 |
| 114 | Un | 25991229-26360520 | 369,292 | 12 | Forward | 2 | 34  | 0.0-0.5     | 0.5   | 47  | 0.0-1.1     | 1.1   |
| 115 | Un | 26361521-26705539 | 344,019 | 16 | Reverse | 2 | 47  | 62.4-66.3   | 62.4  | 78  | 84.0-85.3   | 85.3  |
| 116 | 14 | 1-345721          | 345,721 | 14 | Reverse | 2 | 19  | 0.0-0.4     | 0     | 47  | 1.4-2.0     | 1.4   |
| 117 | 6  | 16660651-17083675 | 423,025 | 6  | Forward | 2 | 14  | 60.8        | 60.5  | 31  | 82.2-83.0   | 83    |
| 118 | 7  | 540726-927258     | 386,533 | 7  | Forward | 2 | 47  | 5.1-8.2     | 5.1   | 56  | 15.4-18.2   | 18.2  |
| 119 | Un | 26706540-26996700 | 290,161 | 1  | Forward | 2 | 69  | 52.9-53.4   | 53.4  | 13  | 74.5        | 73.8  |
| 120 | Un | 26997701-27300803 | 303,103 | 3  | Reverse | 2 | 38  | 77.3-77.9   | 77.9  | 44  | 81.7-82.5   | 81.7  |
| 121 | Un | 27301804-27693698 | 391,895 | 4  | Reverse | 2 | 57  | 103.3-105.0 | 103.3 | 38  | 124.3-125.9 | 124.3 |
| 122 | Un | 27694699-27999486 | 304,788 | 20 | Forward | 2 | 67  | 11.1-12.8   | 11.1  | 65  | 9.3-13.3    | 9.3   |
| 123 | 1  | 27291229-27585783 | 294,555 | 1  | Unknown | 2 | 5   | 97.6        | 97.6  | 6   | 122.8       | 122.8 |
| 124 | 18 | 15991694-16282716 | 291,023 | 18 | Unknown | 2 | 5   | NA          | 64    | 1   | NA          | 81.3  |
| 125 | 5  | 11954056-12251397 | 297,342 | 5  | Reverse | 2 | 15  | 58.0-59.6   | 58.7  | 38  | 76.5-77.6   | 76.5  |
| 126 | Un | 28000487-28291363 | 290,877 | 21 | Forward | 2 | 43  | 63.3-64.0   | 63.3  | 43  | 76.3        | 76.3  |
| 127 | 21 | 11399569-11666335 | 266,767 | 21 | Forward | 2 | 40  | 59.7-62.2   | 62.2  | 49  | 73.7        | 73.7  |
| 128 | Un | 28292364-28543617 | 251,254 | 15 | Reverse | 2 | 30  | 64.6-65.2   | 64.7  | 5   | NA          | 71.1  |
| 129 | Un | 28544618-28819305 | 274,688 | 7  | Reverse | 2 | 38  | 0.7-1.1     | 1.1   | 9   | 0.0-1.1     | 0     |
| 130 | Un | 28820306-29056818 | 236,513 | 10 | Reverse | 2 | 56  | 1.8-2.5     | 2.6   | 51  | 1.4-1.8     | 1.8   |
| 131 | Un | 29057819-29310115 | 252,297 | 7  | Forward | 2 | 26  | 0.0-1.5     | 1.5   | 25  | 8.8-9.6     | 9.6   |
| 132 | Un | 29311116-29570536 | 259,421 | 7  | Forward | 2 | 28  | 97.0-97.5   | 97    | 43  | 130.9       | 130.9 |

|     |    |                   |         |       |         |   |     |           |       |     |             |       |
|-----|----|-------------------|---------|-------|---------|---|-----|-----------|-------|-----|-------------|-------|
| 133 | Un | 29571537-29837943 | 266,407 | 13    | Unknown | 2 | 15  | 64.8      | 64.3  | 5   | 81.1        | 81.1  |
| 134 | Un | 29838944-30096081 | 257,138 | 21    | Unknown | 2 | 6   | NA        | NA    | 6   | 1.9         | 1.9   |
| 135 | Un | 30097082-30343148 | 246,067 | 3     | Reverse | 2 | 21  | 75.0-75.8 | 75    | 35  | 80.7-86.4   | 86.4  |
| 136 | 17 | 410614-641510     | 230,897 | 17    | Reverse | 2 | 28  | 3.0-3.5   | 3.5   | 39  | 5           | NA    |
| 137 | Un | 30344149-30593893 | 249,745 | 20    | Forward | 2 | 37  | 0.0-10.4  | 10.4  | 23  | 0.0-7.0     | 7     |
| 138 | 8  | 19133478-19368704 | 235,227 | 8     | Reverse | 2 | 20  | 73.2      | 73.2  | 49  | 89.2-89.3   | 89.2  |
| 139 | Un | 30594894-30817804 | 222,911 | 12    | Reverse | 2 | 19  | 1.9-3.4   | 3.4   | 29  | 0.9-1.7     | 1.7   |
| 140 | 6  | 16418535-16659650 | 241,116 | 6     | Unknown | 2 | 25  | 60.1      | 60.5  | 43  | 81.1        | 81.1  |
| 141 | Un | 30818805-31038364 | 219,560 | 12    | Unknown | 2 | 1   | NA        | 1.9   | 2   | NA          | 0.9   |
| 142 | 5  | 11742738-11953055 | 210,318 | 5     | Forward | 2 | 24  | 58.4-58.7 | 58.7  | 24  | 76.5-77.0   | 76.5  |
| 143 | 20 | 593103-833141     | 240,039 | 20    | Forward | 2 | 33  | 15.2-17.6 | 15.2  | 37  | 21.1        | 21.1  |
| 144 | 21 | 1-297070          | 297,070 | 21    | Unknown | 2 | 4   | 8.9       | 8.9   | 6   | 2.7         | 2.7   |
| 145 | Un | 31039365-31334864 | 295,500 | 21    | Unknown | 2 | 1   | NA        | 5.6   | 1   | NA          | 1.9   |
| 146 | Un | 31335865-31560395 | 224,531 | 21    | Reverse | 2 | 13  | 69        | 67.7  | 21  | 77.4-77.6   | 77.4  |
| 147 | Un | 31561396-31777177 | 215,782 | 21    | Unknown | 2 | 5   | 8.5       | 8.5   | 2   | NA          | 10.1  |
| 148 | Un | 31778178-31975086 | 196,909 | 12    | Forward | 2 | 21  | 76.0-76.9 | 76.9  | 28  | 91.6-94.3   | 91.6  |
| 149 | Un | 31976087-32163437 | 187,351 | 10    | Forward | 2 | 159 | 62.0-62.9 | 62.2  | 152 | 84.1-84.2   | 84.3  |
| 150 | Un | 32164438-32354918 | 190,481 | 13    | Reverse | 2 | 17  | 65.8-65.9 | 65.8  | 32  | 80.0-80.4   | 80    |
| 151 | Un | 32355919-32547295 | 191,377 | 11    | Forward | 2 | 25  | 44.2      | 44.2  | 61  | 63.5-65.3   | 65.3  |
| 152 | Un | 32548296-32814531 | 266,236 | 4     | Reverse | 2 | 38  | 106.7     | 106.7 | 38  | 127.4-128.2 | 127.4 |
| 153 | 8  | 18946510-19132477 | 185,968 | 8     | Reverse | 2 | 1   | NA        | 73.2  | 57  | 89.7-91.0   | 89.7  |
| 155 | Un | 33000773-33191444 | 190,672 | 21    | Unknown | 2 | 5   | NA        | 11.8  | 0   | NA          | NA    |
| 156 | Un | 33192445-33362665 | 170,221 | 6     | Forward | 2 | 19  | 60.5-61.0 | 60.5  | 13  | 83.7        | 83.7  |
| 157 | Un | 33363666-33534841 | 171,176 | 20    | Forward | 2 | 21  | 9.2-9.7   | 9.2   | 19  | 1.1-5.5     | 0     |
| 158 | 12 | 1-180396          | 180,396 | 12    | Forward | 2 | 36  | 11.4-12.8 | 12.8  | 54  | 10.4        | NA    |
| 159 | Un | 33535842-33702692 | 166,851 | 15    | Forward | 2 | 24  | 2.8       | 2.8   | 16  | 5.0-5.3     | 5     |
| 160 | Un | 33703693-33861776 | 158,084 | 16/10 | Unknown | 2 | 7   | NA        | 59.4  | 6   | NA          | 0.8   |
| 161 | Un | 33862777-34020958 | 158,182 | 3     | Forward | 2 | 15  | 78.3-78.9 | 78.9  | 6   | NA          | 86.4  |
| 162 | Un | 34021959-34197025 | 175,067 | 21    | Unknown | 2 | 5   | NA        | 7.1   | 0   | NA          | NA    |
| 163 | Un | 34198026-34359936 | 161,911 | 19    | Reverse | 2 | 37  | 2.9       | 2.9   | 48  | 3.3-5.2     | 3.3   |
| 164 | Un | 34360937-34619011 | 258,075 | 21    | Unknown | 2 | 1   | NA        | 5.6   | 0   | NA          | NA    |
| 165 | Un | 34620012-34788385 | 168,374 | 1     | Forward | 2 | 34  | 11.1-12.5 | 11.1  | 25  | 12.1-16.5   | 16.5  |
| 167 | Un | 34987570-35142483 | 154,914 | 11    | Unknown | 2 | 9   | 0.4       | 0.4   | 1   | NA          | NA    |
| 168 | Un | 35143484-35297961 | 154,478 | 14    | Reverse | 2 | 36  | 2.6-3.7   | 2.6   | 21  | 3.1-3.7     | 3.1   |
| 169 | Un | 35298962-35453231 | 154,270 | 3     | Forward | 2 | 20  | 39.0-40.3 | 40.3  | 36  | 52          | 52    |
| 170 | 20 | 416734-592102     | 175,369 | 20    | Forward | 2 | 21  | 7.8-8.3   | 7.8   | 36  | 5.7-5.8     | 5.8   |
| 171 | Un | 35454232-35640608 | 186,377 | 9     | Unknown | 2 | 7   | NA        | 59.6  | 3   | NA          | 79.2  |
| 173 | Un | 35817148-36026950 | 209,803 | 9     | Unknown | 2 | 7   | NA        | 69.4  | 9   | NA          | 94.7  |
| 174 | 17 | 766878-935213     | 168,336 | 17    | Forward | 2 | 20  | 5.0-5.6   | 5.6   | 25  | 9.9         | 9.9   |
| 175 | Un | 36027951-36199373 | 171,423 | 1     | Forward | 2 | 25  | 9.4-10.5  | 10.5  | 44  | 8.6-9.4     | 8.6   |
| 176 | Un | 36200374-36342913 | 142,540 | 14    | Unknown | 2 | 5   | NA        | 0     | 7   | 0           | 0     |
| 177 | Un | 36343914-36492910 | 148,997 | 9     | Forward | 2 | 29  | 71.7-72.1 | 72.1  | 30  | 96.8-98.8   | 98.8  |
| 180 | Un | 36787135-36924936 | 137,802 | 12    | Unknown | 2 | 12  | 6.1       | 6.1   | 15  | 5.7         | 5.7   |
| 181 | Un | 36925937-37061398 | 135,462 | 16    | Forward | 2 | 23  | 67.2-67.8 | 67.8  | 31  | 87.8        | 86.5  |
| 182 | Un | 37062399-37196909 | 134,511 | 21    | Reverse | 2 | 8   | 67.7      | 67.7  | 13  | 78.2-79.1   | 79.1  |
| 183 | 9  | 19486084-19607294 | 121,211 | 9     | Reverse | 2 | 37  | 65.8-66.3 | 65.8  | 26  | 88.9-90.0   | 88.9  |
| 184 | Un | 37197910-37345605 | 147,696 | 15    | Reverse | 2 | 51  | 3.8-4.2   | 4.2   | 40  | 6.2-6.5     | 6.5   |

a

|     |    |                   |         |    |         |   |    |           |       |    |            |       |
|-----|----|-------------------|---------|----|---------|---|----|-----------|-------|----|------------|-------|
| 185 | Un | 37346606-37498022 | 151,417 | 7  | Unknown | 2 | 8  | NA        | 13.9  | 0  | NA         | NA    |
| 186 | Un | 37499023-37637380 | 138,358 | 1  | Unknown | 2 | 3  | NA        | 0     | 10 | 0.3        | 0.3   |
| 188 | Un | 37754495-37875713 | 121,219 | 21 | Unknown | 2 | 1  | NA        | NA    | 4  | NA         | 10.1  |
| 189 | 9  | 19627166-19744083 | 116,918 | 9  | Forward | 2 | 25 | 69.4      | 74.6  | 15 | 92.7-101.2 | 100   |
| 190 | 11 | 16563301-16706052 | 142,752 | 11 | Unknown | 2 | 6  | 62.8      | 62.6  | 11 | 84.1       | 78.6  |
| 191 | 17 | 642511-765877     | 123,367 | 17 | Unknown | 2 | 14 | 4.2       | 4.2   | 18 | 5.7        | 5.7   |
| 193 | Un | 38013290-38114339 | 101,050 | 7  | Unknown | 2 | 3  | NA        | 8.2   | 1  | NA         | NA    |
| 194 | Un | 38115340-38232624 | 117,285 | 21 | Unknown | 2 | 1  | NA        | 0     | 0  | NA         | NA    |
| 195 | Un | 38233625-38380945 | 147,321 | 12 | Reverse | 2 | 19 | 5.3-6.5   | 6.5   | 24 | 3          | 3     |
| 196 | Un | 38381946-38480572 | 98,627  | 14 | Unknown | 1 | 12 | NA        | 0     | 15 | NA         | 2     |
| 197 | Un | 38481573-38597001 | 115,429 | 14 | Forward | 2 | 10 | 0.7-0.9   | 0.9   | 19 | 2.4        | 2.4   |
| 198 | Un | 38598002-38706708 | 108,707 | 9  | Unknown | 2 | 3  | NA        | NA    | 7  | 94.7       | 94.7  |
| 199 | Un | 38707709-38805661 | 97,953  | 4  | Unknown | 1 | 20 | NA        | 89.2  | 9  | NA         | NA    |
| 200 | Un | 38806662-38907936 | 101,275 | 13 | Unknown | 2 | 6  | 65.5      | 65.5  | 8  | 79.6       | 79    |
| 201 | Un | 38908937-39051539 | 142,603 | 3  | Unknown | 2 | 2  | NA        | 51.6  | 5  | 61         | 61    |
| 202 | Un | 39052540-39162288 | 109,749 | 16 | Reverse | 2 | 13 | 70.8      | 67.8  | 12 | 86.5-87.4  | 87.4  |
| 203 | Un | 39163289-39271365 | 108,077 | 21 | Unknown | 2 | 0  | NA        | NA    | 2  | NA         | 10.1  |
| 204 | Un | 39272366-39363831 | 91,466  | 1  | Unknown | 1 | 17 | NA        | 5.2   | 14 | NA         | 0.3   |
| 205 | Un | 39364832-39491281 | 126,450 | 9  | Unknown | 2 | 6  | NA        | 66.3  | 4  | NA         | NA    |
| 206 | Un | 39492282-39591840 | 99,559  | 4  | Unknown | 1 | 20 | NA        | 103.3 | 21 | NA         | NA    |
| 208 | Un | 39711137-39820485 | 109,349 | 10 | Reverse | 2 | 63 | 61.0-62.5 | 61    | 52 | 84.4-85.1  | 85.1  |
| 210 | Un | 39910623-39994605 | 83,983  | 1  | Unknown | 1 | 6  | NA        | 95.6  | 7  | NA         | 121.1 |
| 211 | Un | 39995606-40077297 | 81,692  | 8  | Unknown | 1 | 18 | NA        | 71.1  | 14 | NA         | NA    |
| 213 | Un | 40165280-40250677 | 85,398  | 21 | Unknown | 1 | 9  | NA        | 64    | 11 | NA         | 77.4  |
| 214 | Un | 40251678-40339421 | 87,744  | 21 | Unknown | 1 | 6  | NA        | 64    | 10 | NA         | 77.4  |
| 215 | Un | 40340422-40434995 | 94,574  | 21 | Unknown | 1 | 1  | NA        | 8.9   | 0  | NA         | NA    |
| 216 | Un | 40435996-40530711 | 94,716  | 6  | Unknown | 1 | 12 | NA        | 60.1  | 18 | NA         | 74.4  |
| 217 | Un | 40531712-40613024 | 81,313  | 21 | Unknown | 1 | 2  | NA        | 11.5  | 0  | NA         | NA    |
| 218 | Un | 40614025-40703418 | 89,394  | 8  | Unknown | 1 | 13 | NA        | 71.1  | 19 | NA         | 89.2  |
| 219 | Un | 40704419-40783668 | 79,250  | 3  | Unknown | 1 | 5  | NA        | 75    | 13 | NA         | NA    |
| 220 | Un | 40784669-40904766 | 120,098 | 13 | Unknown | 2 | 10 | 64.3      | 64.3  | 1  | NA         | 79    |
| 221 | Un | 40905767-40979726 | 73,960  | 4  | Unknown | 1 | 3  | NA        | 58.1  | 6  | NA         | 67.5  |
| 222 | 4  | 1069877-1173334   | 103,458 | 4  | Unknown | 2 | 14 | 4.2       | 4.2   | 20 | 6          | 6     |
| 224 | Un | 41062695-41270847 | 208,153 | 19 | Unknown | 2 | 0  | NA        | NA    | 3  | 47.9       | 47.9  |
| 225 | Un | 41271848-41362991 | 91,144  | 13 | Unknown | 1 | 4  | NA        | 65.8  | 13 | NA         | 80    |
| 227 | Un | 41490409-41590171 | 99,763  | 21 | Unknown | 1 | 1  | NA        | 8.5   | 2  | NA         | NA    |
| 229 | Un | 41659832-41725083 | 65,252  | 20 | Unknown | 1 | 11 | NA        | 11.1  | 8  | NA         | 9.3   |
| 231 | Un | 41794577-41866531 | 71,955  | 4  | Unknown | 1 | 2  | NA        | 107.3 | 5  | NA         | 127.4 |
| 232 | Un | 41867532-42039735 | 172,204 | 9  | Unknown | 2 | 2  | NA        | 66.3  | 0  | NA         | NA    |
| 234 | Un | 42115228-42185738 | 70,511  | 21 | Unknown | 1 | 2  | NA        | 11.8  | 0  | NA         | NA    |
| 235 | Un | 42186739-42250670 | 63,932  | 2  | Unknown | 1 | 10 | NA        | 78.2  | 19 | NA         | 94.4  |
| 237 | Un | 42315881-42383608 | 67,728  | 12 | Unknown | 1 | 3  | NA        | 0     | 5  | NA         | 1.7   |
| 238 | Un | 42384609-42446850 | 62,242  | 9  | Unknown | 1 | 7  | NA        | 71.7  | 17 | NA         | 94.7  |
| 239 | Un | 42447851-42509289 | 61,439  | 12 | Unknown | 1 | 10 | NA        | 12.8  | 12 | NA         | NA    |
| 240 | Un | 42510290-42576502 | 66,213  | 16 | Unknown | 1 | 5  | NA        | 68.5  | 10 | NA         | 89.4  |
| 242 | Un | 42638668-42734078 | 95,411  | 21 | Unknown | 1 | 0  | NA        | NA    | 1  | NA         | 1.9   |
| 243 | Un | 42735079-42812442 | 77,364  | 13 | Unknown | 1 | 9  | NA        | 0     | 9  | NA         | NA    |

|     |    |                   |         |       |         |   |    |      |       |    |       |       |
|-----|----|-------------------|---------|-------|---------|---|----|------|-------|----|-------|-------|
| 244 | Un | 42813443-42915923 | 102,481 | 9     | Unknown | 2 | 7  | 74.6 | 74.6  | 15 | 100.3 | 100   |
| 246 | Un | 42979616-43037963 | 58,348  | 10    | Unknown | 1 | 86 | NA   | 62.5  | 82 | NA    | 84.1  |
| 247 | Un | 43038964-43093304 | 54,341  | 15    | Unknown | 1 | 12 | NA   | 0.3   | 3  | NA    | NA    |
| 248 | Un | 43094305-43149449 | 55,145  | 16    | Unknown | 1 | 0  | NA   | NA    | 4  | NA    | 46.8  |
| 249 | Un | 43150450-43208946 | 58,497  | 15    | Unknown | 1 | 2  | NA   | 0.3   | 7  | NA    | 0     |
| 251 | Un | 43283583-43336528 | 52,946  | 9     | Unknown | 1 | 1  | NA   | 69.4  | 0  | NA    | NA    |
| 253 | Un | 43389470-43454658 | 65,189  | 11    | Unknown | 1 | 2  | NA   | 11.4  | 2  | NA    | NA    |
| 256 | Un | 43622280-43680027 | 57,748  | 5     | Unknown | 1 | 0  | NA   | NA    | 1  | NA    | 12.9  |
| 257 | 21 | 11667336-11717487 | 50,152  | 21    | Unknown | 1 | 2  | NA   | 67.7  | 0  | NA    | NA    |
| 259 | Un | 43742337-43835441 | 93,105  | 1     | Unknown | 1 | 5  | NA   | 83.5  | 12 | NA    | NA    |
| 260 | Un | 43836442-43892821 | 56,380  | 21    | Unknown | 1 | 1  | NA   | 11.5  | 0  | NA    | NA    |
| 261 | Un | 43893822-43948169 | 54,348  | 14    | Unknown | 1 | 2  | NA   | 6.7   | 0  | NA    | NA    |
| 265 | Un | 44137454-44209165 | 71,712  | 21    | Unknown | 1 | 0  | NA   | NA    | 2  | NA    | 1.9   |
| 266 | Un | 44210166-44266666 | 56,501  | 21    | Unknown | 1 | 1  | NA   | 7.1   | 0  | NA    | NA    |
| 267 | Un | 44267667-44325426 | 57,760  | 9     | Unknown | 1 | 3  | NA   | 64.6  | 6  | NA    | NA    |
| 268 | Un | 44326427-44386154 | 59,728  | 14    | Unknown | 1 | 1  | NA   | 0.7   | 0  | NA    | NA    |
| 269 | Un | 44387155-44431490 | 44,336  | 18    | Unknown | 1 | 4  | NA   | 64    | 2  | NA    | NA    |
| 270 | Un | 44432491-44475220 | 42,730  | 4     | Unknown | 1 | 6  | NA   | 107.3 | 2  | NA    | NA    |
| 273 | Un | 44606402-44648496 | 42,095  | 7     | Unknown | 1 | 9  | NA   | 95.1  | 15 | NA    | 130.9 |
| 276 | Un | 44736933-44778502 | 41,570  | 12    | Unknown | 1 | 13 | NA   | 11.4  | 7  | NA    | NA    |
| 277 | Un | 44779503-44820394 | 40,892  | 6     | Unknown | 1 | 5  | NA   | 60.1  | 12 | NA    | 81.1  |
| 279 | Un | 44891839-44932111 | 40,273  | 17    | Unknown | 1 | 5  | NA   | 0.3   | 15 | NA    | 0     |
| 280 | Un | 44933112-44993620 | 60,509  | 4     | Unknown | 1 | 9  | NA   | 105   | 11 | NA    | NA    |
| 281 | Un | 44994621-45063811 | 69,191  | 4     | Unknown | 1 | 10 | NA   | 106.7 | 7  | NA    | 125.9 |
| 282 | Un | 45064812-45104696 | 39,885  | 21    | Unknown | 1 | 0  | NA   | NA    | 1  | NA    | 10.1  |
| 283 | Un | 45105697-45161722 | 56,026  | 21    | Unknown | 1 | 0  | NA   | NA    | 2  | NA    | 1.9   |
| 285 | Un | 45203822-45244729 | 40,908  | 14    | Unknown | 1 | 3  | NA   | 0.9   | 1  | NA    | 2     |
| 286 | Un | 45245730-45285318 | 39,589  | 12    | Unknown | 1 | 0  | NA   | NA    | 3  | NA    | 52.4  |
| 288 | Un | 45349565-45388744 | 39,180  | 21    | Unknown | 1 | 1  | NA   | 0     | 0  | NA    | NA    |
| 291 | Un | 45511903-45550564 | 38,662  | 21    | Unknown | 1 | 2  | NA   | 7.1   | 1  | NA    | NA    |
| 293 | Un | 45590871-45642025 | 51,155  | 14    | Unknown | 1 | 3  | NA   | 0.7   | 0  | NA    | NA    |
| 294 | Un | 45643026-45696553 | 53,528  | 21    | Unknown | 1 | 1  | NA   | 8.5   | 0  | NA    | NA    |
| 296 | Un | 45736233-45794993 | 58,761  | 9     | Unknown | 1 | 18 | NA   | 64.6  | 5  | NA    | NA    |
| 299 | Un | 45870018-45905559 | 35,542  | 10    | Unknown | 1 | 2  | NA   | 44.9  | 3  | NA    | 54.7  |
| 300 | Un | 45906560-45960251 | 53,692  | 1     | Unknown | 1 | 5  | NA   | 83.5  | 6  | NA    | NA    |
| 303 | Un | 46068541-46103086 | 34,546  | 8     | Unknown | 1 | 1  | NA   | 16.3  | 0  | NA    | NA    |
| 304 | Un | 46104087-46138840 | 34,754  | 20    | Unknown | 1 | 1  | NA   | 53.2  | 0  | NA    | NA    |
| 306 | Un | 46175505-46231026 | 55,522  | 9     | Unknown | 1 | 2  | NA   | 63.7  | 2  | NA    | 86.9  |
| 307 | Un | 46232027-46266711 | 34,685  | 12    | Unknown | 1 | 5  | NA   | 6.1   | 5  | NA    | 1.7   |
| 309 | Un | 46327163-46361761 | 34,599  | 21    | Unknown | 1 | 7  | NA   | NA    | 6  | NA    | 13.4  |
| 311 | Un | 46400029-46460590 | 60,562  | 21    | Unknown | 1 | 2  | NA   | 11.8  | 0  | NA    | NA    |
| 313 | Un | 46514490-46567505 | 53,016  | 20/12 | Unknown | 1 | 1  | NA   | 52.7  | 1  | NA    | 33.1  |
| 314 | Un | 46568506-46603289 | 34,784  | 15    | Unknown | 1 | 2  | NA   | 2.8   | 7  | NA    | 3.6   |
| 316 | Un | 46638551-46670753 | 32,203  | 7     | Unknown | 1 | 1  | NA   | NA    | 1  | NA    | 0     |
| 318 | Un | 46725951-46789913 | 63,963  | 21    | Unknown | 1 | 1  | NA   | 0     | 0  | NA    | NA    |
| 321 | Un | 46876408-46971532 | 95,125  | 20    | Unknown | 1 | 1  | NA   | 11.1  | 0  | NA    | NA    |
| 323 | Un | 47006411-47059861 | 53,451  | 13    | Unknown | 1 | 2  | NA   | 64.3  | 3  | NA    | 81.1  |

b

|     |    |                   |        |    |         |   |    |    |      |    |    |       |
|-----|----|-------------------|--------|----|---------|---|----|----|------|----|----|-------|
| 324 | Un | 47060862-47091664 | 30,803 | 7  | Unknown | 1 | 2  | NA | 97.9 | 4  | NA | 130.9 |
| 326 | Un | 47124039-47177501 | 53,463 | 14 | Unknown | 1 | 0  | NA | NA   | 2  | NA | 2     |
| 327 | Un | 47178502-47208678 | 30,177 | 20 | Unknown | 1 | 5  | NA | NA   | 6  | NA | 60.3  |
| 328 | Un | 47209679-47269348 | 59,670 | 8  | Unknown | 1 | 10 | NA | 24   | 0  | NA | NA    |
| 332 | Un | 47362639-47393753 | 31,115 | 9  | Unknown | 1 | 1  | NA | 20.9 | 6  | NA | 38.9  |
| 334 | Un | 47425274-47482086 | 56,813 | 21 | Unknown | 1 | 0  | NA | NA   | 1  | NA | 10.1  |
| 338 | Un | 47611169-47662141 | 50,973 | 13 | Unknown | 1 | 2  | NA | 64.8 | 12 | NA | 79.6  |
| 339 | Un | 47663142-47722178 | 59,037 | 14 | Unknown | 1 | 4  | NA | 6.7  | 2  | NA | NA    |
| 340 | Un | 47723179-47751104 | 27,926 | 9  | Unknown | 1 | 1  | NA | 66.3 | 0  | NA | NA    |
| 342 | Un | 47804064-47866166 | 62,103 | 21 | Unknown | 1 | 1  | NA | 0    | 0  | NA | NA    |
| 343 | Un | 47867167-47895531 | 28,365 | 21 | Unknown | 1 | 8  | NA | 63.3 | 3  | NA | 77.4  |
| 346 | Un | 47959095-47985867 | 26,773 | 15 | Unknown | 1 | 1  | NA | 51.5 | 1  | NA | 52.1  |
| 349 | Un | 48070254-48096867 | 26,614 | 13 | Unknown | 1 | 9  | NA | 68   | 13 | NA | 76.2  |
| 350 | Un | 48097868-48156594 | 58,727 | 13 | Unknown | 1 | 3  | NA | NA   | 3  | NA | 40.4  |
| 351 | Un | 48157595-48184126 | 26,532 | 21 | Unknown | 1 | 0  | NA | NA   | 1  | NA | 2.7   |
| 352 | Un | 48185127-48236169 | 51,043 | 21 | Unknown | 1 | 1  | NA | 0    | 0  | NA | NA    |
| 355 | Un | 48293502-48318618 | 25,117 | 21 | Unknown | 1 | 12 | NA | 64   | 5  | NA | 77.4  |
| 357 | Un | 48366565-48391571 | 25,007 | 8  | Unknown | 1 | 0  | NA | NA   | 4  | NA | 86.9  |
| 358 | Un | 48392572-48417944 | 25,373 | 11 | Unknown | 1 | 4  | NA | 1    | 2  | NA | NA    |
| 359 | Un | 48418945-48443627 | 24,683 | 1  | Unknown | 1 | 1  | NA | 67   | 5  | NA | NA    |
| 363 | Un | 48545426-48569683 | 24,258 | 14 | Unknown | 1 | 1  | NA | 0.7  | 0  | NA | NA    |
| 365 | Un | 48595857-48620102 | 24,246 | 12 | Unknown | 1 | 1  | NA | NA   | 3  | NA | 1.1   |
| 368 | Un | 48671136-48714869 | 43,734 | 21 | Unknown | 1 | 2  | NA | 8.9  | 0  | NA | NA    |
| 369 | Un | 48715870-48740052 | 24,183 | 9  | Unknown | 1 | 5  | NA | 65.8 | 4  | NA | 92.7  |
| 370 | Un | 48741053-48764711 | 23,659 | 21 | Unknown | 1 | 1  | NA | 11.5 | 0  | NA | NA    |
| 380 | Un | 48990316-49013826 | 23,511 | 12 | Unknown | 1 | 0  | NA | NA   | 1  | NA | 0     |
| 381 | Un | 49014827-49037708 | 22,882 | 13 | Unknown | 1 | 7  | NA | 55.4 | 4  | NA | 69.6  |
| 382 | Un | 49038709-49063862 | 25,154 | 13 | Unknown | 1 | 9  | NA | 46.9 | 5  | NA | 60.9  |
| 385 | Un | 49112679-49135318 | 22,640 | 14 | Unknown | 1 | 2  | NA | 6.7  | 0  | NA | NA    |
| 387 | Un | 49159782-49207533 | 47,752 | 1  | Unknown | 1 | 1  | NA | 63.3 | 0  | NA | NA    |
| 391 | Un | 49278818-49300531 | 21,714 | 16 | Unknown | 1 | 4  | NA | 0    | 0  | NA | NA    |
| 393 | Un | 49324284-49345924 | 21,641 | 1  | Unknown | 1 | 7  | NA | 6.6  | 6  | NA | 5.3   |
| 395 | Un | 49373502-49395098 | 21,597 | 13 | Unknown | 1 | 2  | NA | 64.3 | 0  | NA | NA    |
| 396 | Un | 49396099-49418099 | 22,001 | 12 | Unknown | 1 | 0  | NA | NA   | 2  | NA | 45.6  |
| 397 | Un | 49419100-49440577 | 21,478 | 21 | Unknown | 1 | 4  | NA | 64   | 3  | NA | 77.6  |
| 398 | Un | 49441578-49466932 | 25,355 | 9  | Unknown | 1 | 1  | NA | 65.8 | 0  | NA | NA    |
| 402 | Un | 49537108-49558127 | 21,020 | 13 | Unknown | 1 | 0  | NA | NA   | 1  | NA | 81.1  |
| 404 | Un | 49581057-49601996 | 20,940 | 8  | Unknown | 1 | 0  | NA | NA   | 7  | NA | 83.9  |
| 405 | Un | 49602997-49623832 | 20,836 | 19 | Unknown | 1 | 3  | NA | 0    | 7  | NA | 0     |
| 413 | Un | 49781774-49802315 | 20,542 | 7  | Unknown | 1 | 3  | NA | 5.1  | 2  | NA | 0     |
| 417 | Un | 49868525-49888818 | 20,294 | 7  | Unknown | 1 | 3  | NA | 8.2  | 0  | NA | NA    |
| 419 | Un | 49911083-49931290 | 20,208 | 8  | Unknown | 1 | 1  | NA | 20.3 | 3  | NA | NA    |
| 422 | Un | 49976658-49997270 | 20,613 | 6  | Unknown | 1 | 3  | NA | 60.5 | 11 | NA | 82.2  |
| 423 | Un | 49998271-50018017 | 19,747 | 21 | Unknown | 1 | 4  | NA | 8.5  | 0  | NA | NA    |
| 424 | Un | 50019018-50038855 | 19,838 | 9  | Unknown | 1 | 5  | NA | 64.6 | 2  | NA | 85.1  |
| 425 | Un | 50039856-50061674 | 21,819 | 21 | Unknown | 1 | 2  | NA | 67.7 | 1  | NA | 77.4  |
| 427 | Un | 50083395-50103044 | 19,650 | 14 | Unknown | 1 | 0  | NA | NA   | 1  | NA | 3.7   |

|     |    |                   |        |    |         |   |   |    |       |    |    |       |
|-----|----|-------------------|--------|----|---------|---|---|----|-------|----|----|-------|
| 433 | Un | 50208623-50230651 | 22,029 | 6  | Unknown | 1 | 1 | NA | 61    | 2  | NA | 82.2  |
| 436 | Un | 50271895-50290710 | 18,816 | 21 | Unknown | 1 | 3 | NA | 0     | 1  | NA | NA    |
| 439 | Un | 50331895-50354498 | 22,604 | 4  | Unknown | 1 | 1 | NA | 106.7 | 1  | NA | 128.2 |
| 440 | Un | 50355499-50373966 | 18,468 | 13 | Unknown | 1 | 2 | NA | 68    | 2  | NA | NA    |
| 442 | Un | 50394398-50412766 | 18,369 | 21 | Unknown | 1 | 1 | NA | NA    | 3  | NA | 77.4  |
| 443 | Un | 50413767-50431847 | 18,081 | 8  | Unknown | 1 | 2 | NA | 68.4  | 2  | NA | 77.2  |
| 446 | Un | 50470946-50488940 | 17,995 | 7  | Unknown | 1 | 1 | NA | 2.6   | 1  | NA | 11.5  |
| 447 | 9  | 19608295-19626165 | 17,871 | 9  | Unknown | 1 | 2 | NA | 74.6  | 3  | NA | 98.8  |
| 453 | Un | 50620164-50637765 | 17,602 | 7  | Unknown | 1 | 7 | NA | 1.1   | 1  | NA | NA    |
| 455 | Un | 50657180-50674591 | 17,412 | 12 | Unknown | 1 | 3 | NA | 46    | 3  | NA | 50.6  |
| 456 | Un | 50675592-50692994 | 17,403 | 21 | Unknown | 1 | 1 | NA | NA    | 1  | NA | 1.9   |
| 468 | Un | 50899409-50916489 | 17,081 | 8  | Unknown | 1 | 1 | NA | 55.3  | 1  | NA | 77.2  |
| 470 | Un | 50935545-50952590 | 17,046 | 13 | Unknown | 1 | 0 | NA | NA    | 1  | NA | 40.4  |
| 472 | Un | 50972612-50989710 | 17,099 | 10 | Unknown | 1 | 1 | NA | 63.4  | 3  | NA | 83    |
| 473 | Un | 50990711-51007659 | 16,949 | 4  | Unknown | 1 | 4 | NA | NA    | 1  | NA | 50.4  |
| 475 | Un | 51026996-51043724 | 16,729 | 7  | Unknown | 1 | 3 | NA | 2.6   | 4  | NA | 9.6   |
| 478 | Un | 51115257-51132144 | 16,888 | 14 | Unknown | 1 | 0 | NA | NA    | 1  | NA | 2     |
| 482 | Un | 51188528-51204986 | 16,459 | 16 | Unknown | 1 | 7 | NA | 38.1  | 1  | NA | 46.8  |
| 486 | Un | 51258562-51274863 | 16,302 | 21 | Unknown | 1 | 1 | NA | 7.1   | 1  | NA | 10.1  |
| 497 | Un | 51451746-51467660 | 15,915 | 8  | Unknown | 1 | 4 | NA | 28.3  | 2  | NA | NA    |
| 501 | Un | 51519186-51536345 | 17,160 | 20 | Unknown | 1 | 1 | NA | NA    | 3  | NA | 9.3   |
| 509 | Un | 51655187-51671091 | 15,905 | 21 | Unknown | 1 | 1 | NA | 0     | 0  | NA | NA    |
| 511 | Un | 51688524-51705859 | 17,336 | 20 | Unknown | 1 | 1 | NA | 7.8   | 1  | NA | 13.3  |
| 516 | Un | 51775211-51790509 | 15,299 | 7  | Unknown | 1 | 0 | NA | NA    | 1  | NA | 63.7  |
| 517 | Un | 51791510-51806797 | 15,288 | 15 | Unknown | 1 | 7 | NA | 3.8   | 10 | NA | 6.2   |
| 520 | Un | 51840909-51856407 | 15,499 | 13 | Unknown | 1 | 1 | NA | 65.5  | 6  | NA | NA    |
| 521 | Un | 51857408-51872569 | 15,162 | 4  | Unknown | 1 | 0 | NA | NA    | 1  | NA | 127.4 |
| 522 | Un | 51873570-51889777 | 16,208 | 9  | Unknown | 1 | 4 | NA | 74.6  | 5  | NA | 100   |
| 524 | Un | 51906862-51921932 | 15,071 | 6  | Unknown | 1 | 2 | NA | 60.5  | 3  | NA | 82.2  |
| 529 | Un | 51988383-52003350 | 14,968 | 20 | Unknown | 1 | 3 | NA | 11.1  | 2  | NA | 7     |
| 542 | Un | 52201296-52216041 | 14,746 | 17 | Unknown | 1 | 1 | NA | 0     | 1  | NA | 0     |
| 545 | Un | 52250580-52265215 | 14,636 | 4  | Unknown | 1 | 2 | NA | 1.3   | 2  | NA | NA    |
| 550 | Un | 52328471-52342789 | 14,319 | 21 | Unknown | 1 | 3 | NA | 64    | 6  | NA | 77.6  |
| 559 | Un | 52499012-52513129 | 14,118 | 21 | Unknown | 1 | 0 | NA | NA    | 1  | NA | 13.4  |
| 560 | Un | 52514130-52528076 | 13,947 | 4  | Unknown | 1 | 4 | NA | 1.3   | 0  | NA | NA    |
| 562 | Un | 52543993-52561524 | 17,532 | 8  | Unknown | 1 | 5 | NA | 73.2  | 1  | NA | NA    |
| 563 | Un | 52562525-52576412 | 13,888 | 11 | Unknown | 1 | 4 | NA | NA    | 5  | NA | 17.8  |
| 564 | Un | 52577413-52591281 | 13,869 | 19 | Unknown | 1 | 9 | NA | 46.1  | 4  | NA | 60.5  |
| 578 | Un | 52789509-52803384 | 13,876 | 12 | Unknown | 1 | 0 | NA | NA    | 3  | NA | 47.8  |
| 579 | Un | 52804385-52821172 | 16,788 | 13 | Unknown | 1 | 4 | NA | 18.8  | 1  | NA | 30.1  |
| 587 | Un | 52923191-52936646 | 13,456 | 3  | Unknown | 1 | 4 | NA | 72.9  | 2  | NA | NA    |
| 593 | Un | 53009594-53022925 | 13,332 | 1  | Unknown | 1 | 4 | NA | 97.6  | 4  | NA | 122.8 |
| 599 | Un | 53094667-53107818 | 13,152 | 11 | Unknown | 1 | 2 | NA | 13.5  | 1  | NA | 25.8  |
| 600 | Un | 53108819-53121857 | 13,039 | 21 | Unknown | 1 | 0 | NA | NA    | 5  | NA | 77.4  |
| 601 | Un | 53122858-53135889 | 13,032 | 15 | Unknown | 1 | 6 | NA | 51.5  | 6  | NA | 55.4  |
| 604 | Un | 53165806-53178953 | 13,148 | 9  | Unknown | 1 | 1 | NA | 69.4  | 2  | NA | 94.7  |
| 605 | Un | 53179954-53193336 | 13,383 | 4  | Unknown | 1 | 3 | NA | 105   | 3  | NA | 127.4 |



|     |    |                   |        |    |         |   |    |    |      |   |    |       |
|-----|----|-------------------|--------|----|---------|---|----|----|------|---|----|-------|
| 613 | Un | 53293363-53306362 | 13,000 | 21 | Unknown | 1 | 1  | NA | 0    | 0 | NA | NA    |
| 615 | Un | 53321160-53333933 | 12,774 | 2  | Unknown | 1 | 2  | NA | 8.6  | 1 | NA | 21.4  |
| 618 | Un | 53362880-53377982 | 15,103 | 9  | Unknown | 1 | 1  | NA | 61.9 | 0 | NA | NA    |
| 620 | Un | 53395873-53408554 | 12,682 | 2  | Unknown | 1 | 2  | NA | 18.5 | 0 | NA | NA    |
| 621 | Un | 53409555-53422235 | 12,681 | 12 | Unknown | 1 | 1  | NA | 17.8 | 1 | NA | 19.9  |
| 625 | Un | 53464341-53476958 | 12,618 | 21 | Unknown | 1 | 3  | NA | 10.9 | 0 | NA | NA    |
| 632 | Un | 53561747-53574175 | 12,429 | 4  | Unknown | 1 | 0  | NA | NA   | 2 | NA | 51    |
| 637 | Un | 53628730-53641078 | 12,349 | 9  | Unknown | 1 | 1  | NA | 64.6 | 0 | NA | NA    |
| 642 | Un | 53696395-53708682 | 12,288 | 10 | Unknown | 1 | 1  | NA | 61   | 0 | NA | NA    |
| 664 | Un | 53988298-54001569 | 13,272 | 9  | Unknown | 1 | 0  | NA | NA   | 5 | NA | 100.3 |
| 676 | 13 | 20071502-20083130 | 11,629 | 13 | Unknown | 1 | 1  | NA | 66.6 | 1 | NA | 79    |
| 680 | Un | 54210990-54222567 | 11,578 | 9  | Unknown | 1 | 0  | NA | NA   | 3 | NA | 100   |
| 681 | Un | 54223568-54235116 | 11,549 | 13 | Unknown | 1 | 2  | NA | 64.3 | 4 | NA | 76.2  |
| 682 | Un | 54236117-54248584 | 12,468 | 21 | Unknown | 1 | 1  | NA | 8.5  | 0 | NA | NA    |
| 683 | Un | 54249585-54261089 | 11,505 | 1  | Unknown | 1 | 0  | NA | NA   | 1 | NA | 121.1 |
| 689 | Un | 54325891-54337328 | 11,438 | 5  | Unknown | 1 | 2  | NA | 0.2  | 4 | NA | 0.4   |
| 691 | Un | 54350689-54362032 | 11,344 | 2  | Unknown | 1 | 1  | NA | 72.4 | 3 | NA | 88.6  |
| 695 | Un | 54400542-54411831 | 11,290 | 15 | Unknown | 1 | 0  | NA | NA   | 2 | NA | 81.7  |
| 697 | Un | 54425236-54436497 | 11,262 | 9  | Unknown | 1 | 3  | NA | 63.7 | 0 | NA | NA    |
| 698 | Un | 54437498-54451049 | 13,552 | 13 | Unknown | 1 | 0  | NA | NA   | 1 | NA | 20.2  |
| 707 | Un | 54551394-54562409 | 11,016 | 15 | Unknown | 1 | 3  | NA | 0.3  | 2 | NA | 5     |
| 713 | Un | 54623353-54634314 | 10,962 | 7  | Unknown | 1 | 0  | NA | NA   | 2 | NA | 32.6  |
| 717 | Un | 54671166-54682090 | 10,925 | 13 | Unknown | 1 | 1  | NA | 64.8 | 0 | NA | NA    |
| 718 | Un | 54683091-54694002 | 10,912 | 10 | Unknown | 1 | 13 | NA | 62.2 | 4 | NA | 84.1  |
| 719 | Un | 54695003-54705978 | 10,976 | 16 | Unknown | 1 | 0  | NA | NA   | 2 | NA | 84    |
| 727 | Un | 54789801-54800560 | 10,760 | 1  | Unknown | 1 | 1  | NA | 10.5 | 6 | NA | 8.6   |
| 729 | Un | 54813406-54824116 | 10,711 | 5  | Unknown | 1 | 1  | NA | 13.5 | 1 | NA | 18.9  |
| 730 | Un | 54825117-54835821 | 10,705 | 15 | Unknown | 1 | 3  | NA | 67.4 | 0 | NA | NA    |
| 732 | Un | 54848788-54859473 | 10,686 | 11 | Unknown | 1 | 1  | NA | 0    | 0 | NA | NA    |
| 735 | Un | 54884944-54895928 | 10,985 | 15 | Unknown | 1 | 0  | NA | NA   | 3 | NA | 80.4  |
| 739 | Un | 54935473-54946056 | 10,584 | 14 | Unknown | 1 | 0  | NA | NA   | 1 | NA | 5.6   |
| 740 | Un | 54947057-54957634 | 10,578 | 9  | Unknown | 1 | 1  | NA | 74.6 | 2 | NA | 100   |
| 741 | Un | 54958635-54969306 | 10,672 | 1  | Unknown | 1 | 1  | NA | 5.2  | 4 | NA | 0.3   |
| 742 | Un | 54970307-54980780 | 10,474 | 10 | Unknown | 1 | 2  | NA | 0    | 3 | NA | 6.1   |
| 745 | Un | 55005167-55015604 | 10,438 | 15 | Unknown | 1 | 0  | NA | NA   | 1 | NA | 6.2   |
| 748 | Un | 55039432-55049815 | 10,384 | 21 | Unknown | 1 | 1  | NA | 11.6 | 0 | NA | NA    |
| 749 | Un | 55050816-55061334 | 10,519 | 21 | Unknown | 1 | 1  | NA | 0    | 0 | NA | NA    |
| 751 | Un | 55073677-55084012 | 10,336 | 15 | Unknown | 1 | 2  | NA | 3.8  | 0 | NA | NA    |
| 757 | Un | 55142438-55152645 | 10,208 | 9  | Unknown | 1 | 2  | NA | 74.6 | 3 | NA | 100   |
| 758 | Un | 55153646-55163846 | 10,201 | 16 | Unknown | 1 | 0  | NA | NA   | 1 | NA | 0     |
| 761 | Un | 55187184-55197327 | 10,144 | 4  | Unknown | 1 | 0  | NA | NA   | 1 | NA | 50.4  |
| 762 | Un | 55198328-55208455 | 10,128 | 14 | Unknown | 1 | 1  | NA | 0.4  | 0 | NA | NA    |
| 764 | Un | 55220561-55230649 | 10,089 | 21 | Unknown | 1 | 1  | NA | 11.8 | 2 | NA | 11.5  |
| 768 | Un | 55264836-55274873 | 10,038 | 16 | Unknown | 1 | 3  | NA | 67.8 | 0 | NA | NA    |
| 786 | Un | 55471340-55481338 | 9,999  | 13 | Unknown | 1 | 1  | NA | 64.8 | 0 | NA | NA    |
| 793 | Un | 55550131-55559845 | 9,715  | 18 | Unknown | 1 | 1  | NA | 26.1 | 1 | NA | NA    |
| 796 | Un | 55583639-55594378 | 10,740 | 6  | Unknown | 1 | 0  | NA | NA   | 1 | NA | 81.1  |

|      |    |                   |        |    |         |   |    |    |      |    |    |       |
|------|----|-------------------|--------|----|---------|---|----|----|------|----|----|-------|
| 806  | Un | 55692216-55701794 | 9,579  | 4  | Unknown | 1 | 1  | NA | 89.2 | 1  | NA | NA    |
| 812  | Un | 55794638-55804183 | 9,546  | 8  | Unknown | 1 | 0  | NA | NA   | 4  | NA | 77.2  |
| 814  | Un | 55816024-55825525 | 9,502  | 12 | Unknown | 1 | 2  | NA | 12.8 | 3  | NA | 10.4  |
| 822  | Un | 55903920-55913364 | 9,445  | 13 | Unknown | 1 | 5  | NA | 51.2 | 1  | NA | 65.9  |
| 829  | Un | 55977368-55986733 | 9,366  | 12 | Unknown | 1 | 1  | NA | 55.5 | 0  | NA | NA    |
| 830  | Un | 55987734-55997092 | 9,359  | 15 | Unknown | 1 | 3  | NA | 4.2  | 1  | NA | 9     |
| 834  | Un | 56029278-56038557 | 9,280  | 13 | Unknown | 1 | 0  | NA | NA   | 2  | NA | 79    |
| 837  | Un | 56060876-56070125 | 9,250  | 7  | Unknown | 1 | 2  | NA | 45.4 | 2  | NA | 63.7  |
| 842  | Un | 56113504-56122641 | 9,138  | 8  | Unknown | 1 | 1  | NA | 73.2 | 4  | NA | 89.2  |
| 843  | Un | 56123642-56132773 | 9,132  | 2  | Unknown | 1 | 0  | NA | NA   | 6  | NA | 38.1  |
| 857  | Un | 56266790-56275772 | 8,983  | 16 | Unknown | 1 | 0  | NA | NA   | 2  | NA | 40.7  |
| 861  | Un | 56306684-56315644 | 8,961  | 9  | Unknown | 1 | 0  | NA | NA   | 3  | NA | 94.7  |
| 868  | Un | 56376232-56385129 | 8,898  | 1  | Unknown | 1 | 1  | NA | 94.3 | 1  | NA | 111.6 |
| 869  | Un | 56386130-56396944 | 10,815 | 1  | Unknown | 1 | 1  | NA | 6.6  | 1  | NA | 3.6   |
| 872  | Un | 56417956-56426818 | 8,863  | 20 | Unknown | 1 | 0  | NA | NA   | 1  | NA | 5.7   |
| 877  | Un | 56470671-56479449 | 8,779  | 6  | Unknown | 1 | 1  | NA | 60.1 | 0  | NA | NA    |
| 882  | Un | 56519794-56528503 | 8,710  | 9  | Unknown | 1 | 1  | NA | 5.6  | 9  | NA | NA    |
| 889  | Un | 56590570-56599187 | 8,618  | 1  | Unknown | 1 | 1  | NA | 97.6 | 2  | NA | 121.1 |
| 891  | Un | 56609799-56618406 | 8,608  | 8  | Unknown | 1 | 2  | NA | 71.1 | 0  | NA | NA    |
| 894  | Un | 56638581-56647142 | 8,562  | 21 | Unknown | 1 | 0  | NA | NA   | 2  | NA | 17.4  |
| 906  | Un | 56755315-56763764 | 8,450  | 9  | Unknown | 1 | 0  | NA | NA   | 1  | NA | 90    |
| 913  | Un | 56823823-56832224 | 8,402  | 21 | Unknown | 1 | 3  | NA | 7.1  | 1  | NA | 2.7   |
| 926  | Un | 56945457-56953670 | 8,214  | 3  | Unknown | 1 | 0  | NA | NA   | 7  | NA | 46.2  |
| 930  | Un | 56982433-56990599 | 8,167  | 13 | Unknown | 1 | 0  | NA | NA   | 4  | NA | 76.2  |
| 931  | Un | 56991600-56999761 | 8,162  | 4  | Unknown | 1 | 1  | NA | 0    | 0  | NA | NA    |
| 935  | Un | 57028453-57036596 | 8,144  | 3  | Unknown | 1 | 3  | NA | 14.8 | 0  | NA | NA    |
| 936  | Un | 57037597-57045738 | 8,142  | 1  | Unknown | 1 | 0  | NA | NA   | 1  | NA | 54.7  |
| 937  | Un | 57046739-57054879 | 8,141  | 9  | Unknown | 1 | 0  | NA | NA   | 1  | NA | 90    |
| 938  | Un | 57055880-57064019 | 8,140  | 8  | Unknown | 1 | 0  | NA | NA   | 2  | NA | 89.7  |
| 944  | Un | 57110641-57118739 | 8,099  | 2  | Unknown | 1 | 1  | NA | 79.7 | 0  | NA | NA    |
| 953  | Un | 57192712-57200726 | 8,015  | 7  | Unknown | 1 | 1  | NA | 95.1 | 1  | NA | 129.8 |
| 954  | Un | 57201727-57209734 | 8,008  | 7  | Unknown | 1 | 0  | NA | NA   | 1  | NA | 32.6  |
| 957  | Un | 57228709-57236667 | 7,959  | 14 | Unknown | 1 | 0  | NA | NA   | 2  | NA | 52.7  |
| 962  | Un | 57275801-57283719 | 7,919  | 13 | Unknown | 1 | 0  | NA | NA   | 5  | NA | 60.9  |
| 968  | 15 | 16190873-16198764 | 7,892  | 15 | Unknown | 1 | 0  | NA | NA   | 1  | NA | 80.4  |
| 977  | Un | 57406596-57414431 | 7,836  | 17 | Unknown | 1 | 0  | NA | NA   | 1  | NA | 1.8   |
| 978  | Un | 57415432-57423259 | 7,828  | 4  | Unknown | 1 | 0  | NA | NA   | 2  | NA | 62.8  |
| 986  | Un | 57486141-57493844 | 7,704  | 21 | Unknown | 1 | 2  | NA | 0    | 2  | NA | 11.2  |
| 994  | Un | 57560167-57567818 | 7,652  | 13 | Unknown | 1 | 2  | NA | 64.3 | 4  | NA | 76.2  |
| 996  | Un | 57577468-57585103 | 7,636  | 21 | Unknown | 1 | 1  | NA | 8.5  | 0  | NA | NA    |
| 999  | Un | 57603360-57610962 | 7,603  | 10 | Unknown | 1 | 21 | NA | 62.2 | 14 | NA | 84.4  |
| 1001 | Un | 57620562-57628158 | 7,597  | 20 | Unknown | 1 | 1  | NA | 49.3 | 0  | NA | NA    |
| 1008 | Un | 57684233-57691769 | 7,537  | 12 | Unknown | 1 | 1  | NA | 43.7 | 2  | NA | 50.6  |
| 1009 | Un | 57692770-57700288 | 7,519  | 13 | Unknown | 1 | 1  | NA | 64.3 | 5  | NA | 76.2  |
| 1010 | Un | 57701289-57710250 | 8,962  | 21 | Unknown | 1 | 0  | NA | NA   | 1  | NA | 10.1  |
| 1014 | Un | 57737580-57745044 | 7,465  | 20 | Unknown | 1 | 2  | NA | 10.4 | 6  | NA | 5.8   |
| 1019 | Un | 57780348-57787785 | 7,438  | 9  | Unknown | 1 | 0  | NA | NA   | 2  | NA | 40.4  |

|      |    |                   |       |    |         |   |   |    |       |   |    |       |
|------|----|-------------------|-------|----|---------|---|---|----|-------|---|----|-------|
| 1020 | Un | 57788786-57796210 | 7,425 | 4  | Unknown | 1 | 1 | NA | 107.3 | 0 | NA | NA    |
| 1023 | Un | 57814059-57821464 | 7,406 | 3  | Unknown | 1 | 0 | NA | NA    | 1 | NA | 0     |
| 1029 | Un | 57866552-57873922 | 7,371 | 15 | Unknown | 1 | 1 | NA | 2.8   | 0 | NA | NA    |
| 1041 | Un | 57966706-57974006 | 7,301 | 21 | Unknown | 1 | 1 | NA | NA    | 1 | NA | 1.9   |
| 1049 | Un | 58033452-58040717 | 7,266 | 4  | Unknown | 1 | 1 | NA | 106.7 | 2 | NA | 127.4 |
| 1050 | Un | 58041718-58048980 | 7,263 | 9  | Unknown | 1 | 0 | NA | NA    | 3 | NA | 103.2 |
| 1058 | Un | 58107766-58114972 | 7,207 | 8  | Unknown | 1 | 2 | NA | 60.8  | 1 | NA | 77.2  |
| 1060 | Un | 58124278-58131480 | 7,203 | 11 | Unknown | 1 | 0 | NA | NA    | 1 | NA | 27.8  |
| 1067 | Un | 58181913-58189096 | 7,184 | 19 | Unknown | 1 | 1 | NA | 10.3  | 0 | NA | NA    |
| 1070 | Un | 58207785-58214942 | 7,158 | 1  | Unknown | 1 | 0 | NA | NA    | 5 | NA | 8.6   |
| 1073 | Un | 58232223-58239350 | 7,128 | 4  | Unknown | 1 | 0 | NA | NA    | 2 | NA | 3     |
| 1075 | Un | 58248464-58255667 | 7,204 | 8  | Unknown | 1 | 1 | NA | NA    | 8 | NA | 67.5  |
| 1082 | Un | 58305532-58313200 | 7,669 | 16 | Unknown | 1 | 3 | NA | 30.6  | 0 | NA | NA    |
| 1087 | Un | 58346812-58353833 | 7,022 | 8  | Unknown | 1 | 1 | NA | 37.1  | 0 | NA | NA    |
| 1088 | Un | 58354834-58361851 | 7,018 | 1  | Unknown | 1 | 2 | NA | 1.4   | 0 | NA | NA    |
| 1090 | Un | 58370965-58377974 | 7,010 | 13 | Unknown | 1 | 1 | NA | 39.2  | 0 | NA | NA    |
| 1093 | Un | 58394962-58401921 | 6,960 | 10 | Unknown | 1 | 0 | NA | NA    | 1 | NA | 83    |
| 1099 | Un | 58442928-58449842 | 6,915 | 9  | Unknown | 1 | 0 | NA | NA    | 5 | NA | 92.7  |
| 1108 | Un | 58516038-58522861 | 6,824 | 21 | Unknown | 1 | 1 | NA | 67.7  | 1 | NA | 77.6  |
| 1112 | Un | 58547512-58554305 | 6,794 | 19 | Unknown | 1 | 0 | NA | NA    | 1 | NA | 0     |
| 1124 | Un | 58642106-58648769 | 6,664 | 17 | Unknown | 1 | 2 | NA | 2     | 4 | NA | 0     |
| 1127 | Un | 58665171-58671783 | 6,613 | 16 | Unknown | 1 | 1 | NA | 26.1  | 0 | NA | NA    |
| 1130 | Un | 58688105-58694710 | 6,606 | 15 | Unknown | 1 | 3 | NA | 2.8   | 7 | NA | 6.2   |
| 1132 | Un | 58703412-58709991 | 6,580 | 13 | Unknown | 1 | 0 | NA | NA    | 4 | NA | 69.6  |
| 1141 | Un | 58775011-58781497 | 6,487 | 14 | Unknown | 1 | 2 | NA | NA    | 4 | NA | 2     |
| 1142 | Un | 58782498-58788984 | 6,487 | 20 | Unknown | 1 | 1 | NA | 37.8  | 7 | NA | 37.6  |
| 1154 | Un | 58872130-58878547 | 6,418 | 13 | Unknown | 1 | 1 | NA | 68    | 1 | NA | 79    |
| 1156 | Un | 58886966-58893374 | 6,409 | 5  | Unknown | 1 | 3 | NA | 11.1  | 0 | NA | NA    |
| 1160 | Un | 58916963-58923327 | 6,365 | 12 | Unknown | 1 | 1 | NA | 43.7  | 0 | NA | NA    |
| 1170 | Un | 58991377-58997682 | 6,306 | 2  | Unknown | 1 | 1 | NA | 24.5  | 0 | NA | NA    |
| 1173 | Un | 59013853-59020155 | 6,303 | 11 | Unknown | 1 | 1 | NA | 44.2  | 3 | NA | 63.5  |
| 1181 | Un | 59072976-59079224 | 6,249 | 20 | Unknown | 1 | 1 | NA | 7.8   | 1 | NA | 9.3   |
| 1194 | Un | 59172468-59178813 | 6,346 | 9  | Unknown | 1 | 0 | NA | NA    | 1 | NA | 32.8  |
| 1199 | Un | 59208628-59214706 | 6,079 | 3  | Unknown | 1 | 1 | NA | 72.9  | 0 | NA | NA    |
| 1204 | Un | 59244749-59250799 | 6,051 | 19 | Unknown | 1 | 2 | NA | 10.3  | 1 | NA | 3.3   |
| 1210 | Un | 59289613-59295617 | 6,005 | 21 | Unknown | 1 | 5 | NA | 7.1   | 2 | NA | 2.7   |
| 1212 | Un | 59303622-59309615 | 5,994 | 5  | Unknown | 1 | 0 | NA | NA    | 2 | NA | 76.5  |
| 1217 | Un | 59338681-59344656 | 5,976 | 21 | Unknown | 1 | 1 | NA | 0     | 0 | NA | NA    |
| 1226 | Un | 59401927-59407835 | 5,909 | 11 | Unknown | 1 | 0 | NA | NA    | 1 | NA | 8.6   |
| 1238 | Un | 59485131-59490955 | 5,825 | 3  | Unknown | 1 | 3 | NA | 75    | 0 | NA | NA    |
| 1249 | Un | 59564168-59569895 | 5,728 | 11 | Unknown | 1 | 1 | NA | 0     | 2 | NA | 0     |
| 1265 | Un | 59673974-59679712 | 5,739 | 17 | Unknown | 1 | 3 | NA | 0.3   | 0 | NA | NA    |
| 1269 | Un | 59701145-59706743 | 5,599 | 20 | Unknown | 1 | 3 | NA | 21.6  | 4 | NA | NA    |
| 1276 | Un | 59749913-59755470 | 5,558 | 13 | Unknown | 1 | 2 | NA | 64.3  | 0 | NA | NA    |
| 1278 | Un | 59763027-59768578 | 5,552 | 4  | Unknown | 1 | 3 | NA | 0     | 0 | NA | NA    |
| 1282 | Un | 59790253-59795762 | 5,510 | 15 | Unknown | 1 | 1 | NA | 0.3   | 2 | NA | 0     |
| 1285 | Un | 59810044-59815547 | 5,504 | 13 | Unknown | 1 | 1 | NA | 65.8  | 0 | NA | NA    |

|      |    |                   |       |    |         |   |   |    |      |   |    |       |
|------|----|-------------------|-------|----|---------|---|---|----|------|---|----|-------|
| 1286 | Un | 59816548-59822925 | 6,378 | 6  | Unknown | 1 | 0 | NA | NA   | 2 | NA | 6.8   |
| 1287 | Un | 59823926-59829422 | 5,497 | 15 | Unknown | 1 | 1 | NA | 13.7 | 1 | NA | NA    |
| 1290 | Un | 59843506-59848992 | 5,487 | 1  | Unknown | 1 | 2 | NA | 52.9 | 0 | NA | NA    |
| 1292 | Un | 59858071-59863555 | 5,485 | 2  | Unknown | 1 | 3 | NA | 26.4 | 1 | NA | 37.8  |
| 1294 | Un | 59871040-59876620 | 5,581 | 6  | Unknown | 1 | 0 | NA | NA   | 2 | NA | 14.7  |
| 1298 | Un | 59899551-59905001 | 5,451 | 17 | Unknown | 1 | 2 | NA | 2    | 2 | NA | NA    |
| 1322 | Un | 60058027-60064074 | 6,048 | 12 | Unknown | 1 | 0 | NA | NA   | 1 | NA | 40.1  |
| 1326 | Un | 60084738-60090014 | 5,277 | 11 | Unknown | 1 | 0 | NA | NA   | 1 | NA | 5.3   |
| 1327 | Un | 60091015-60096434 | 5,420 | 4  | Unknown | 1 | 0 | NA | NA   | 1 | NA | 50.4  |
| 1331 | Un | 60117280-60122507 | 5,228 | 7  | Unknown | 1 | 1 | NA | 8.2  | 1 | NA | 18.2  |
| 1332 | Un | 60123508-60128829 | 5,322 | 7  | Unknown | 1 | 1 | NA | 22.9 | 0 | NA | NA    |
| 1334 | Un | 60136508-60141715 | 5,208 | 3  | Unknown | 1 | 0 | NA | NA   | 1 | NA | 2.7   |
| 1336 | Un | 60148923-60154126 | 5,204 | 13 | Unknown | 1 | 1 | NA | 65.8 | 1 | NA | 80    |
| 1340 | Un | 60175586-60180783 | 5,198 | 18 | Unknown | 1 | 4 | NA | 31.7 | 0 | NA | NA    |
| 1348 | Un | 60225181-60230339 | 5,159 | 7  | Unknown | 1 | 0 | NA | NA   | 1 | NA | 95.4  |
| 1351 | Un | 60244643-60249779 | 5,137 | 13 | Unknown | 1 | 1 | NA | 16.1 | 0 | NA | NA    |
| 1352 | Un | 60250780-60255915 | 5,136 | 12 | Unknown | 1 | 4 | NA | NA   | 2 | NA | 19.9  |
| 1353 | Un | 60256916-60262050 | 5,135 | 6  | Unknown | 1 | 1 | NA | 60.1 | 0 | NA | NA    |
| 1361 | Un | 60306588-60312291 | 5,704 | 21 | Unknown | 1 | 0 | NA | NA   | 2 | NA | 10.1  |
| 1365 | Un | 60332199-60337369 | 5,171 | 15 | Unknown | 1 | 1 | NA | 7.4  | 1 | NA | NA    |
| 1372 | Un | 60376086-60381181 | 5,096 | 13 | Unknown | 1 | 0 | NA | NA   | 1 | NA | 76.2  |
| 1375 | Un | 60394914-60399882 | 4,969 | 12 | Unknown | 1 | 1 | NA | 29.6 | 0 | NA | NA    |
| 1381 | Un | 60432449-60437367 | 4,919 | 8  | Unknown | 1 | 1 | NA | 60.8 | 0 | NA | NA    |
| 1383 | Un | 60447261-60452371 | 5,111 | 6  | Unknown | 1 | 1 | NA | 60.5 | 0 | NA | NA    |
| 1384 | Un | 60453372-60458274 | 4,903 | 1  | Unknown | 1 | 1 | NA | 71.6 | 4 | NA | 111.6 |
| 1395 | Un | 60522052-60526831 | 4,780 | 9  | Unknown | 1 | 0 | NA | NA   | 2 | NA | 100   |
| 1405 | Un | 60583829-60589568 | 5,740 | 12 | Unknown | 1 | 0 | NA | NA   | 2 | NA | 94.3  |
| 1430 | Un | 60736464-60740997 | 4,534 | 16 | Unknown | 1 | 1 | NA | 25.8 | 0 | NA | NA    |
| 1532 | Un | 61339158-61344191 | 5,034 | 3  | Unknown | 1 | 1 | NA | 19.1 | 1 | NA | 27.1  |

Note (a): This scaffold mapped to two different chromosomes with the read correlation method (chromosome 16 in the FTC cross and chromosome 10 in the BEPA cross). This mapping is supported by 7 SNPs in the FTC cross, but the peak correlation is driven by a single SNP (chrUn:33,811,784). A BLAT search with a 100 base region surrounding this SNP maps to many regions of the genome, and the rest of the 6 FTC SNPs correlate with a region on chromosome 10. Therefore the likely location of this scaffold in both crosses is chromosome 10. Note (b): This scaffold also mapped to two different chromosomes with the read correlation method (chromosome 20 in the FTC cross and chromosome 12 in the BEPA cross). The BEPA marker is supported by 1 SNP (chrUn:46,516,721). A BLAT search with a 100 base region surrounding this SNP maps perfectly to many regions of the genome, including chromosome 12 and 20. Therefore the likely location of this scaffold in both crosses is chromosome 20.
