# Supplementary material for: Genome Assembly Improvement and Mapping Convergently Evolved Skeletal Traits in Sticklebacks with Genotyping-by-Sequencing
Source: G3 (Bethesda). 2015 Jun 3;5(7):1463–72. doi: 10.1534/g3.115.017905 (PMC4502380; doi:10.1534/g3.115.017905)
Supplement: Supporting Information [file supp_g3.115.017905_FileS1.xlsx]

## Sheet: Genetic Map
Chromosome	Marker	Genetic Position
1	83_2	0
1	83_1	0.701
1	92_1	1.417
1	92_2	2.937
1	97_1	5.221
1	97_2	6.603
1	175_1	9.399
1	175_2	10.474
1	165_1	11.142
1	165_2	12.495
1	30_1	18.818
1	30_2	25.045
1	30_3	32.717
1	30_4	36.42
1	30_5	39.26
1	30_6	42.59
1	30_7	44.192
1	30_8	44.979
1	30_9	46.4
1	7_1	47.654
1	7_2	48.418
1	7_3	48.965
1	7_4	49.428
1	7_6	49.531
1	7_7	49.711
1	7_9	49.869
1	7_8	49.924
1	7_10	50.821
1	7_11	51.187
1	22_11	52.002
1	7_16	52.278
1	22_12	52.578
1	119_1	52.896
1	7_18	53.05
1	7_21	53.163
1	7_22	53.17
1	7_20	53.173
1	7_19	53.201
1	7_28	53.256
1	7_27	53.289
1	7_26	53.292
1	7_24	53.302
1	22_14	53.303
1	22_15	53.317
1	7_23	53.335
1	119_2	53.368
1	7_25	53.418
1	7_17	53.511
1	7_15	53.668
1	7_14	53.809
1	7_13	53.957
1	7_12	54.098
1	22_13	54.321
1	22_10	55.315
1	22_9	55.557
1	22_8	57.318
1	22_7	58.444
1	22_6	59.807
1	22_5	63.323
1	22_4	63.729
1	22_3	64.992
1	22_2	67.01
1	22_1	71.578
1	74_2	83.461
1	82_2	94.334
1	82_1	95.634
1	123_2	97.617
2	98_2	0
2	63_2	0.247
2	98_1	0.436
2	63_1	0.797
2	0_1	1.005
2	0_2	1.284
2	0_3	2.11
2	0_4	4.655
2	0_5	8.618
2	0_6	11.748
2	0_7	15.364
2	0_8	16.317
2	0_9	18.53
2	0_10	19.688
2	0_11	20.611
2	0_12	22.058
2	0_13	22.145
2	0_14	22.435
2	0_15	22.788
2	0_16	23.051
2	0_17	23.38
2	0_18	24.04
2	0_19	24.203
2	0_20	24.492
2	0_21	25.178
2	0_22	25.21
2	0_23	25.52
2	0_24	25.68
2	0_27	26.117
2	0_26	26.15
2	0_25	26.261
2	0_28	26.427
2	0_29	26.46
2	0_30	26.68
2	0_31	27.572
2	0_32	28.986
2	0_33	29.919
2	0_34	31.552
2	0_35	32.952
2	0_36	36.742
2	0_37	39.764
2	0_38	42.983
2	0_39	48.532
2	0_40	58.778
2	0_41	66.476
2	0_42	72.421
2	0_43	76.431
2	102_1	78.222
2	102_2	79.684
2	96_2	79.779
2	96_1	79.863
3	33_1	0
3	33_2	1.538
3	33_3	7.474
3	33_4	9.847
3	33_5	12.064
3	33_6	12.51
3	15_2	12.783
3	15_1	12.868
3	33_7	13.116
3	15_3	13.779
3	15_4	14.308
3	15_5	14.574
3	15_6	14.76
3	15_7	15.421
3	15_8	16.4
3	15_9	17.481
3	15_10	19.129
3	15_11	20.312
3	15_12	20.971
3	15_13	21.999
3	15_14	22.622
3	15_15	23.479
3	15_16	24.004
3	15_17	24.859
3	15_18	26.279
3	15_19	27.468
3	15_20	29.602
3	15_21	30.532
3	15_22	31.758
3	78_1	34.022
3	78_2	34.925
3	169_1	39.027
3	169_2	40.308
3	81_1	42.497
3	81_2	45.086
3	50_2	51.582
3	50_4	72.929
3	135_2	74.977
3	135_1	75.795
3	120_2	77.291
3	120_1	77.892
3	161_1	78.318
3	161_2	78.867
4	65_1	0
4	65_2	1.343
4	65_3	2.821
4	222_1	4.152
4	20_1	7.61
4	20_2	12.865
4	20_3	18.585
4	20_4	24.411
4	20_5	31.579
4	20_6	36.922
4	20_7	40.457
4	20_8	43.043
4	20_9	43.477
4	20_10	46.167
4	20_11	49.027
4	20_12	49.809
4	20_13	50.304
4	20_14	50.855
4	20_15	51.076
4	20_16	51.45
4	17_1	51.642
4	17_2	52.254
4	17_3	52.756
4	17_4	52.885
4	17_5	53.541
4	17_6	54.674
4	17_7	55.19
4	17_8	55.509
4	17_10	55.683
4	17_9	55.694
4	17_11	56.29
4	17_12	56.655
4	17_13	57.113
4	17_14	57.741
4	17_15	58.102
4	17_16	58.371
4	17_17	58.475
4	17_18	58.572
4	108_2	58.704
4	24_12	58.846
4	24_10	58.977
4	24_9	58.978
4	24_11	58.99
4	24_1	59.072
4	24_2	59.103
4	24_6	59.131
4	24_7	59.133
4	24_3	59.134
4	24_4	59.134
4	24_5	59.134
4	24_8	59.191
4	28_9	59.212
4	28_8	59.252
4	28_7	59.302
4	28_6	59.309
4	28_10	59.394
4	28_5	59.506
4	28_4	59.57
4	28_3	59.977
4	28_2	60.379
4	28_1	60.678
4	42_1	60.965
4	42_2	61.862
4	42_3	63.876
4	42_4	66.4
4	42_5	68.976
4	41_1	70.615
4	41_2	72.12
4	41_3	78.075
4	41_4	83.156
4	41_5	89.189
4	121_2	103.339
4	121_1	104.978
4	152_2	106.715
4	90_1	107.308
5	54_1	0
5	54_2	0.208
5	54_3	0.605
5	48_1	1.453
5	48_2	3.342
5	48_3	4.584
5	19_15	5.978
5	48_4	6.041
5	19_16	6.131
5	19_14	6.218
5	19_13	6.383
5	19_12	7.733
5	19_11	8.96
5	19_10	9.425
5	19_9	10.071
5	19_8	11.123
5	19_7	13.119
5	19_6	13.478
5	19_5	14.373
5	19_4	15.013
5	19_3	16.109
5	19_2	17.351
5	19_1	19.331
5	38_1	22.789
5	38_2	23.969
5	38_3	28.882
5	38_4	30.349
5	38_5	32.536
5	38_6	38.337
5	93_2	41.158
5	93_1	43.827
5	73_2	48.885
5	73_1	53.902
5	112_2	57.042
5	112_1	57.771
5	125_2	57.981
5	142_2	58.388
5	142_1	58.729
5	125_1	59.628
6	61_3	0
6	61_2	0.25
6	61_1	1.16
6	66_2	1.715
6	66_1	2.582
6	35_7	2.775
6	76_2	2.929
6	35_6	2.961
6	76_1	3.412
6	35_5	3.62
6	35_4	4.988
6	35_3	6.098
6	35_2	7.061
6	35_1	8.54
6	13_1	10.687
6	13_2	12.544
6	13_3	13.525
6	13_4	14.206
6	13_5	15.194
6	13_6	16.25
6	13_7	16.672
6	13_8	16.926
6	13_9	17.71
6	13_10	17.841
6	13_11	18.369
6	13_12	18.883
6	13_13	19.286
6	13_14	19.996
6	13_15	20.869
6	13_16	21.848
6	13_17	22.718
6	13_18	23.827
6	13_19	24.8
6	13_20	27.873
6	13_21	32.076
6	13_22	34.519
6	13_23	40.862
6	13_24	47.234
6	13_25	54.314
6	140_1	60.093
6	156_1	60.527
6	117_1	60.807
6	156_2	61.05
7	131_2	0
7	129_2	0.742
7	129_1	1.098
7	131_1	1.473
7	86_2	2.646
7	86_1	3.574
7	118_1	5.081
7	118_2	8.163
7	55_1	13.89
7	55_2	18.891
7	55_3	22.878
7	39_1	25.511
7	39_2	27.664
7	39_3	36.847
7	39_4	40.336
7	39_5	43.74
7	23_1	45.382
7	23_2	46.131
7	23_3	46.403
7	23_4	46.552
7	23_5	47.486
7	23_6	47.757
7	23_7	47.881
7	23_8	47.929
7	23_10	48.229
7	23_9	48.337
7	23_11	48.532
7	106_1	48.662
7	47_2	48.734
7	47_1	48.758
7	23_12	48.761
7	47_4	48.775
7	1_2	48.782
7	1_1	48.799
7	106_2	48.803
7	47_3	48.804
7	1_4	48.907
7	1_6	49.186
7	1_5	49.215
7	1_7	49.365
7	1_8	49.398
7	1_9	49.467
7	1_10	49.792
7	1_11	50.073
7	1_12	50.074
7	1_13	50.128
7	1_15	50.235
7	1_14	50.29
7	1_16	50.591
7	1_17	50.67
7	1_20	51.184
7	1_19	51.188
7	1_18	51.411
7	1_22	51.651
7	1_21	51.753
7	1_23	52.545
7	1_25	54.67
7	1_26	55.111
7	1_27	56.259
7	1_28	57.84
7	1_29	59.907
7	1_30	65.339
7	1_32	73.304
7	1_33	82.374
7	1_34	90.587
7	1_35	95.137
7	132_1	97.035
7	113_1	97.479
7	132_2	97.509
7	113_2	97.948
8	56_1	0
8	56_2	3.174
8	56_3	3.53
8	53_1	4.564
8	53_2	4.974
8	53_3	5.504
8	36_1	6.59
8	36_2	9.933
8	36_3	13.785
8	36_4	16.252
8	36_5	18.591
8	36_6	20.292
8	36_7	22.317
8	9_1	22.784
8	9_2	23.998
8	9_3	24.678
8	9_4	25.173
8	9_5	25.798
8	9_6	25.954
8	9_7	26.602
8	9_8	26.832
8	9_9	26.845
8	9_10	27.528
8	9_12	27.587
8	9_11	27.609
8	9_13	27.616
8	9_14	27.751
8	9_15	27.956
8	9_16	28.283
8	9_17	28.406
8	9_18	28.597
8	9_19	29.525
8	9_20	30.555
8	9_21	32.717
8	9_22	34.269
8	9_23	37.056
8	9_24	39.325
8	9_25	43.715
8	9_26	50.228
8	9_27	55.263
8	9_28	60.835
8	71_1	68.355
8	71_2	71.098
8	138_2	73.178
9	31_1	0
9	31_2	2.755
9	31_3	5.615
9	31_4	11.258
9	31_5	16.533
9	31_6	19.231
9	31_7	19.663
9	31_8	20.147
9	31_9	20.27
9	8_27	20.465
9	8_24	20.868
9	8_25	21.069
9	8_22	22.234
9	8_21	23.407
9	8_19	23.785
9	8_20	23.843
9	8_18	24.461
9	8_17	25.696
9	8_16	26.021
9	8_15	26.225
9	8_14	27.421
9	8_13	28.562
9	8_12	28.673
9	8_10	29.184
9	8_11	29.36
9	8_9	29.823
9	8_8	31.47
9	8_7	32.516
9	8_6	33.618
9	8_5	35.399
9	8_4	37.917
9	8_3	39.877
9	8_2	43.619
9	8_1	47.185
9	77_1	54.082
9	77_2	56.703
9	91_2	59.551
9	91_1	61.907
9	105_1	63.734
9	105_2	64.643
9	183_2	65.768
9	183_1	66.271
9	189_1	69.41
9	177_1	71.678
9	177_2	72.133
9	244_1	74.575
9	87_2	76.27
9	87_1	76.896
10	5_2	0
10	130_1	1.801
10	111_1	2.019
10	101_2	2.024
10	58_2	2.031
10	5_1	2.21
10	111_2	2.341
10	130_2	2.495
10	101_1	2.608
10	58_1	2.926
10	5_3	4.07
10	5_4	5.057
10	5_5	7.194
10	5_6	8.255
10	5_7	9.803
10	5_8	11.688
10	5_9	14.158
10	5_10	16.417
10	5_11	18.884
10	5_12	20.271
10	5_13	20.558
10	5_14	20.932
10	5_15	21.163
10	5_16	22.27
10	5_17	22.549
10	5_18	22.688
10	5_19	23.018
10	5_20	24.065
10	5_21	25.257
10	5_22	25.747
10	5_23	27.585
10	5_24	28.444
10	5_25	30.55
10	5_26	36.073
10	5_27	40.928
10	5_28	44.879
10	5_29	52.459
10	208_1	60.979
10	149_2	61.96
10	5_30	62.179
10	208_2	62.491
10	149_1	62.878
10	59_1	63.443
10	59_2	64.663
10	59_3	65.206
11	80_2	0
11	80_1	0.195
11	167_2	0.45
11	75_1	0.774
11	49_4	0.895
11	49_3	0.982
11	49_2	1.166
11	75_2	1.315
11	49_1	1.525
11	11_1	3.222
11	11_2	5.649
11	11_3	6.308
11	11_5	9.259
11	11_4	9.558
11	11_6	11.428
11	11_8	11.621
11	11_7	11.653
11	11_9	12.297
11	11_10	12.537
11	11_11	12.854
11	11_12	13.175
11	11_13	13.501
11	11_14	14.274
11	11_15	15.063
11	11_16	15.473
11	11_17	15.856
11	11_18	17.774
11	11_19	18.864
11	11_20	19.232
11	11_21	20.237
11	11_22	21.271
11	11_23	24.447
11	11_24	28.818
11	11_25	35.749
11	11_26	40.52
11	151_1	44.24
11	79_2	49.406
11	79_1	53.409
11	100_2	61.533
11	100_1	62.575
11	190_2	62.829
11	103_2	64.191
11	103_1	64.835
12	114_1	0
12	114_2	0.452
12	139_2	1.87
12	139_1	3.382
12	195_2	5.261
12	180_1	6.088
12	195_1	6.45
12	158_1	11.37
12	158_2	12.808
12	62_1	17.769
12	62_2	23.485
12	62_3	26.322
12	99_2	28.165
12	99_1	29.623
12	68_1	37.726
12	68_2	40.337
12	64_1	41.365
12	64_2	43.662
12	6_29	46.033
12	6_28	47.859
12	6_27	48.32
12	6_26	49.368
12	6_25	51.176
12	6_23	51.731
12	6_24	51.748
12	6_22	51.868
12	6_21	52.052
12	6_20	52.874
12	6_19	53.536
12	6_17	53.909
12	6_18	53.922
12	6_16	54.606
12	6_15	54.75
12	6_14	55.495
12	6_13	56.546
12	6_12	56.629
12	6_11	57.277
12	6_10	57.702
12	6_9	58.88
12	6_8	59.731
12	6_7	60.365
12	6_6	63.406
12	6_5	65.71
12	6_4	66.454
12	6_3	66.537
12	6_2	67.345
12	70_2	67.841
12	6_1	67.965
12	70_1	68.792
12	60_3	69.953
12	60_2	72.924
12	60_1	75.23
12	148_1	75.965
12	148_2	76.874
13	51_3	0
13	51_2	0.373
13	51_1	0.458
13	52_1	0.716
13	52_2	1.225
13	52_3	2.447
13	4_1	3.465
13	4_2	4.445
13	4_3	6.052
13	4_4	7.888
13	4_5	9.839
13	4_6	11.743
13	4_7	13.466
13	4_8	14.228
13	4_9	15.223
13	4_10	15.323
13	4_11	16.085
13	4_12	16.319
13	4_13	16.653
13	4_14	16.936
13	4_15	17.576
13	4_16	17.928
13	4_17	18.103
13	4_18	18.432
13	4_19	18.625
13	4_20	18.801
13	4_21	19.686
13	4_22	20.34
13	4_23	21.136
13	4_24	21.38
13	4_25	21.53
13	4_26	22.57
13	4_27	23.45
13	4_28	24.565
13	4_29	26.8
13	4_31	32.582
13	4_32	39.223
13	57_3	46.935
13	57_2	51.2
13	57_1	55.417
13	220_1	64.294
13	133_2	64.792
13	200_1	65.511
13	150_2	65.773
13	150_1	65.877
13	107_1	66.646
13	107_2	68.04
14	116_1	0
14	116_2	0.364
14	197_1	0.689
14	197_2	0.893
14	168_2	2.584
14	168_1	3.684
14	12_1	6.671
14	12_2	12.48
14	12_3	21.559
14	12_4	31.189
14	12_5	36.855
14	12_6	41.932
14	12_7	44.638
14	12_8	47.761
14	12_9	50.363
14	12_10	51.595
14	12_11	52.285
14	12_12	53.977
14	12_13	55.396
14	12_14	57.045
14	12_15	58.094
14	12_16	59.584
14	12_17	60.583
14	12_18	61.694
14	12_19	62.719
14	12_20	63.524
14	12_21	64.7
14	12_22	65.242
14	12_23	66.045
14	12_24	66.339
14	40_4	66.543
14	40_5	66.67
14	40_3	66.787
14	12_26	66.854
14	12_25	66.974
14	40_2	68.312
14	40_1	68.949
14	88_2	69.602
15	110_2	0
15	110_1	0.319
15	159_2	2.771
15	184_2	3.829
15	184_1	4.235
15	72_2	7.397
15	72_1	13.732
15	10_1	20.774
15	10_2	26.37
15	10_3	32.786
15	10_4	38.094
15	10_5	41.574
15	10_6	44.216
15	10_7	45.806
15	10_8	46.403
15	10_9	47.445
15	10_10	48.657
15	10_11	49.394
15	10_12	49.916
15	10_13	50.535
15	10_14	51.178
15	10_15	51.468
15	10_16	52.401
15	10_17	53.505
15	10_18	54.41
15	10_19	56.09
15	10_20	57.842
15	10_21	60.066
15	10_22	61.09
15	10_23	61.803
15	10_25	64.508
15	128_2	64.595
15	10_26	64.718
15	10_27	64.801
15	45_4	64.954
15	45_3	65.083
15	128_1	65.237
15	10_24	65.321
15	45_2	66.849
15	45_1	67.432
15	84_1	67.747
15	84_2	68.406
16	26_1	0
16	26_2	0.595
16	26_3	1.301
16	26_4	3.878
16	26_5	5.608
16	26_6	10.171
16	26_7	14.993
16	26_8	16.573
16	26_9	18.323
16	26_10	19.938
16	26_11	20.777
16	14_1	21.852
16	14_2	22.308
16	14_3	23.001
16	14_4	24.5
16	14_5	24.806
16	14_6	25.753
16	14_7	26.076
16	14_8	26.802
16	14_9	27.607
16	14_10	28.071
16	14_11	28.435
16	14_12	29.271
16	14_13	30.005
16	14_15	30.594
16	14_16	30.614
16	14_14	30.766
16	14_18	33.225
16	14_19	34.956
16	14_21	38.128
16	44_3	55.971
16	44_2	59.399
16	44_1	59.411
16	115_2	62.437
16	115_1	66.322
16	181_1	67.194
16	181_2	67.829
16	69_2	68.488
16	69_1	68.78
16	202_1	70.771
17	89_1	0
17	89_2	0.344
17	109_2	0.629
17	109_1	2
17	136_2	2.971
17	136_1	3.536
17	191_2	4.193
17	174_1	5.019
17	174_2	5.596
17	25_2	11.524
17	25_3	15.336
17	25_4	23.123
17	25_5	26.243
17	25_6	28.352
17	25_7	29.611
17	25_8	31.256
17	25_9	32.721
17	25_11	33.219
17	27_11	33.399
17	25_12	33.476
17	27_9	33.572
17	25_10	33.611
17	27_10	33.664
17	27_8	33.944
17	27_7	33.954
17	27_2	34.197
17	18_4	34.249
17	18_3	34.251
17	27_4	34.252
17	18_5	34.263
17	27_3	34.268
17	18_1	34.268
17	27_6	34.275
17	27_1	34.283
17	18_2	34.299
17	27_5	34.333
17	18_6	34.905
17	18_7	36.084
17	18_8	36.8
17	18_9	38.274
17	18_10	42.351
17	18_11	46.28
17	18_12	54.45
17	18_13	59.482
17	18_14	64.67
17	18_15	66.222
17	18_16	67.311
17	18_17	69.147
18	29_1	0
18	29_2	0.534
18	29_3	2.135
18	29_4	4.951
18	29_5	9.654
18	29_6	13.352
18	29_7	15.244
18	29_8	16.699
18	29_10	17.047
18	21_1	17.077
18	29_9	17.087
18	21_2	17.115
18	21_3	17.431
18	21_4	17.505
18	21_5	18.134
18	21_6	19.145
18	21_7	20.815
18	21_8	21.713
18	21_9	22.729
18	21_10	23.651
18	21_11	25.349
18	21_12	26.084
18	21_13	27.396
18	21_14	28.535
18	21_15	29.588
18	32_1	30.801
18	32_2	31.697
18	32_3	34.395
18	32_4	38.877
18	32_5	45.581
18	32_6	51.321
18	32_7	58.693
18	32_8	63.979
19	85_1	0
19	85_2	1.437
19	163_2	2.913
19	34_1	10.304
19	34_2	20.104
19	34_3	32.009
19	34_4	38.784
19	34_5	40.698
19	3_33	41.483
19	34_6	41.551
19	34_7	41.591
19	3_32	42.021
19	3_25	43.785
19	3_26	43.896
19	3_15	45.108
19	3_13	45.159
19	3_14	45.198
19	3_12	45.267
19	3_10	45.406
19	3_16	45.413
19	3_17	45.51
19	3_18	45.844
19	3_19	45.962
19	3_21	46.033
19	3_22	46.076
19	3_20	46.139
19	3_23	46.145
19	3_24	46.384
19	3_28	46.406
19	3_29	46.428
19	3_27	46.74
19	3_31	46.908
19	3_30	47.045
19	3_11	48.259
19	3_9	49.754
19	3_6	56.773
19	3_5	60.468
19	3_4	65.257
19	3_3	71.735
19	3_2	73.623
19	3_1	74.265
20	137_1	0
20	170_2	7.759
20	170_1	8.348
20	104_1	8.886
20	157_1	9.21
20	104_2	9.412
20	157_2	9.714
20	137_2	10.381
20	122_1	11.073
20	122_2	12.847
20	143_1	15.208
20	143_2	17.577
20	2_35	21.619
20	2_34	27.734
20	2_33	37.8
20	2_31	44.383
20	2_30	47.132
20	2_29	49.279
20	2_28	51.469
20	2_26	51.495
20	2_27	51.505
20	2_25	51.615
20	2_24	51.958
20	2_23	52.665
20	2_22	53.176
20	2_21	53.195
20	2_20	53.33
20	2_19	53.368
20	2_18	53.686
20	2_17	53.998
20	2_16	54.199
20	2_15	54.36
20	2_14	54.489
20	2_13	54.655
20	2_12	55.652
20	2_11	55.999
20	2_10	56.441
20	2_9	56.669
20	2_8	60.461
20	2_7	62.528
20	2_6	65.239
20	2_5	69.115
20	2_4	70.94
20	2_3	72.274
20	2_2	73.324
20	2_1	74.568
20	46_2	74.626
20	46_1	74.899
20	46_4	76.488
20	46_3	76.981
21	94_2	0
21	95_1	5.614
21	95_2	7.137
21	147_2	8.5
21	144_2	8.916
21	16_16	10.908
21	16_13	11.038
21	16_8	11.52
21	16_4	11.555
21	16_5	11.628
21	16_2	11.64
21	16_3	11.689
21	37_6	11.717
21	16_1	11.723
21	37_1	11.765
21	37_3	11.786
21	37_5	11.807
21	37_4	11.877
21	37_2	11.968
21	16_6	12.481
21	16_9	12.922
21	16_10	13.63
21	16_11	14.17
21	16_12	14.576
21	16_14	14.576
21	16_15	14.576
21	16_18	19.179
21	16_19	23.242
21	43_1	27.187
21	43_2	29.629
21	43_3	35.602
21	43_4	42.189
21	67_1	47.508
21	67_2	53.938
21	127_1	59.725
21	127_2	62.198
21	126_1	63.304
21	126_2	64.011
21	182_2	67.723
21	146_1	69.015

## Sheet: Genotypes
id	83_2	83_1	92_1	92_2	97_1	97_2	175_1	175_2	165_1	165_2	30_1	30_2	30_3	30_4	30_5	30_6	30_7	30_8	30_9	7_1	7_2	7_3	7_4	7_6	7_7	7_9	7_8	7_10	7_11	22_11	7_16	22_12	119_1	7_18	7_21	7_22	7_20	7_19	7_28	7_27	7_26	7_24	22_14	22_15	7_23	119_2	7_25	7_17	7_15
	1	1	1	1	1	1	1	1	1	1	1	1	1	1	1	1	1	1	1	1	1	1	1	1	1	1	1	1	1	1	1	1	1	1	1	1	1	1	1	1	1	1	1	1	1	1	1	1	1
	0	0.701	1.417	2.937	5.221	6.603	9.399	10.474	11.142	12.495	18.818	25.045	32.717	36.42	39.26	42.59	44.192	44.979	46.4	47.654	48.418	48.965	49.428	49.531	49.711	49.869	49.924	50.821	51.187	52.002	52.278	52.578	52.896	53.05	53.163	53.17	53.173	53.201	53.256	53.289	53.292	53.302	53.303	53.317	53.335	53.368	53.418	53.511	53.668
FtcF2_1_1	MF	MF	MF	MF	MF	MF	MF	MF	MF	MF	MF	MF	MF	MF	MF	MF	FF	FF	FF	FF	FF	FF	FF	FF	FF	FF	FF	FF	FF	FF	FF	FF	FF	FF	FF	FF	FF	FF	FF	FF	FF	FF	FF	FF	FF	FF	FF	FF	FF
FtcF2_1_2	MF	MF	MF	MF	MF	MF	MF	MF	MF	MF	MF	MF	MF	MF	MF	MF	MF	MF	FF	FF	FF	FF	FF	FF	FF	FF	FF	FF	FF	FF	FF	FF	FF	FF	FF	FF	FF	FF	FF	FF	FF	FF	FF	FF	FF	FF	FF	FF	FF
FtcF2_1_3	MF	MF	MF	MF	MF	MF	MM	MF	MF	MF	MF	MF	FF	FF	FF	FF	FF	FF	FF	FF	FF	FF	FF	FF	FF	FF	FF	FF	FF	MF	FF	MF	MF	FF	MF	MF	MF	MF	MF	MF	MF	MF	MF	MF	MF	MF	MF	FF	FF
FtcF2_1_4	MM	MM	MM	MM	MM	MM	MM	MM	MM	MM	MM	MM	MF	MF	MF	MF	MF	MF	MF	MF	MF	MF	MF	MF	MF	MF	MF	MF	MF	MF	MF	MF	MF	MF	MF	MF	MF	MF	MF	MF	MF	MF	MF	MF	MF	MF	MF	MF	MF
FtcF2_1_5	FF	FF	FF	FF	FF	FF	FF	FF	FF	FF	FF	FF	FF	FF	FF	FF	FF	FF	FF	FF	FF	FF	FF	FF	FF	FF	FF	FF	FF	FF	FF	FF	FF	FF	FF	FF	FF	FF	FF	FF	FF	FF	FF	FF	FF	FF	FF	FF	FF
FtcF2_1_6	MM	MM	MM	MM	MM	MM	MM	MM	MM	MM	MM	MF	FF	FF	FF	FF	FF	FF	FF	FF	FF	FF	FF	FF	FF	FF	FF	FF	FF	MF	FF	MF	FF	FF	FF	FF	FF	FF	FF	FF	FF	FF	FF	FF	FF	FF	FF	FF	FF
FtcF2_1_7	FF	FF	FF	FF	FF	FF	FF	FF	FF	FF	FF	FF	FF	FF	FF	MF	MF	MF	MF	MM	MM	MM	MM	MM	MM	MM	MM	MM	MM	MM	MM	MM	MM	MM	MM	MM	MM	MM	MM	MM	MM	MM	MM	MM	MM	MM	MM	MM	MM
FtcF2_1_8	MF	MF	MF	MF	MF	MF	MF	MF	MF	MF	MF	MM	MM	MF	MF	MF	MF	MF	MF	MF	MF	MF	MF	MF	MF	MF	MF	MF	MF	MF	MF	MF	MF	MF	MF	MF	MF	MF	MF	MF	MF	MF	MF	MF	MF	MF	MF	MF	MF
FtcF2_1_9	MF	MF	MF	MF	MF	MF	MF	MF	MF	MF	MF	MF	MM	MM	MM	MM	MM	MM	MM	MM	MM	MM	MM	MM	MM	MM	MM	MM	MM	MM	MM	MM	MM	MM	MM	MM	MM	MM	MM	MM	MM	MM	MM	MM	MM	MM	MM	MM	MM
FtcF2_1_10	MM	MM	MM	MM	MM	MM	MM	MM	MM	MM	MM	MM	MM	MM	MM	MM	MM	MM	MM	MF	MF	MF	MF	MF	MF	MF	MF	MF	MF	MF	MF	MF	MF	MF	MF	MF	MF	MF	MF	MF	MF	MF	MF	MF	MF	MF	MF	MF	MF
FtcF2_1_11	MF	FF	FF	FF	FF	FF	FF	FF	FF	FF	FF	FF	FF	FF	FF	FF	FF	FF	FF	FF	FF	FF	FF	FF	FF	FF	FF	FF	FF	FF	FF	FF	FF	FF	FF	FF	FF	FF	FF	FF	FF	FF	FF	FF	FF	FF	FF	FF	FF
FtcF2_1_12	MF	MF	MF	MF	MF	MF	MF	MF	MF	MF	MF	MF	MF	MF	MF	MF	MF	MF	MF	MF	MF	MF	MF	MF	MF	MF	MF	MF	MF	MF	MF	MF	MF	MF	MF	MF	MF	MF	MF	MF	MF	MF	MF	MF	MF	MF	MF	MM	MF
FtcF2_1_13	MF	notFF	notMM	MF	MF	MF	MF	notMM	notMM	notMM	FF	FF	FF	FF	FF	FF	FF	FF	FF	FF	FF	FF	FF	FF	FF	FF	FF	FF	FF	FF	FF	FF	FF	FF	FF	FF	FF	FF	FF	FF	FF	FF	FF	FF	FF	FF	FF	FF	FF
FtcF2_1_14	MF	MF	MF	MF	MF	notMM	notMM	notMM	notMM	notMM	MF	MM	MM	MM	MM	MM	MM	MM	notFF	MM	MM	MM	MM	MM	MM	MM	MM	MM	MM	MM	MM	MM	MM	MM	MM	MM	MM	MM	MM	MM	MM	MM	MM	MM	MM	notFF	MM	MM	MM
FtcF2_1_15	FF	FF	FF	FF	FF	FF	FF	FF	FF	FF	FF	FF	FF	FF	MF	MF	MF	MF	MF	MF	MF	MF	MF	MF	MF	MF	MF	MF	MF	MF	MF	MF	MF	MF	MF	MF	MF	MF	MF	MF	MF	MF	MF	MF	MF	MF	MF	MF	MF
FtcF2_1_16	FF	FF	FF	FF	FF	FF	notMM	FF	FF	notMM	FF	FF	FF	FF	FF	FF	FF	FF	FF	FF	FF	FF	FF	FF	FF	MF	FF	MF	MF	MF	MF	MF	MF	MF	MF	MF	MF	MF	MF	MF	MF	MF	MF	MF	MF	MF	MF	MF	MF
FtcF2_1_17	MF	MF	MF	MF	MF	MF	notMM	MF	MF	MF	MF	MF	MF	MF	MF	MF	MF	MF	MF	MF	FF	FF	FF	FF	FF	FF	FF	FF	FF	FF	FF	FF	FF	FF	FF	FF	FF	FF	FF	FF	FF	FF	FF	FF	FF	FF	FF	FF	FF
FtcF2_1_18	MM	MM	MM	MM	MM	MM	MM	MM	notFF	MM	MM	MM	MM	MM	MM	MM	MM	MM	MM	MM	MM	MM	MM	MM	MM	MM	MM	MM	MM	MM	MM	MM	MM	MM	MM	MM	MM	MM	MM	MM	MM	MM	MM	MM	MM	MM	MM	MM	MM
FtcF2_1_19	notMM	FF	notMM	FF	FF	FF	NA	notMM	notMM	notMM	FF	FF	FF	FF	FF	FF	FF	FF	FF	FF	FF	FF	FF	FF	FF	FF	FF	FF	FF	MF	MF	MF	MF	MF	MF	MF	MF	MF	MF	MF	MF	MF	MF	MF	MF	MF	MF	MF	FF
FtcF2_1_20	MM	MM	MM	MM	MM	MM	notFF	notFF	notFF	notFF	MM	MM	MM	MF	MF	MF	MF	notMM	MF	MF	MF	MF	MF	MF	MF	MF	MF	MF	MF	FF	MF	FF	FF	FF	FF	FF	FF	FF	FF	FF	FF	FF	FF	FF	FF	FF	FF	MF	MF
FtcF2_1_21	MM	MM	MM	MF	MF	MF	MF	MF	MF	MF	MF	MF	MF	MF	MF	MF	MF	MF	MF	MF	MF	MF	MF	MF	MF	MF	MF	MF	MF	FF	MF	FF	FF	MF	FF	FF	FF	FF	FF	FF	FF	FF	FF	FF	FF	FF	FF	MF	MF
FtcF2_1_22	MF	MF	notFF	MF	MF	MF	MM	notMM	notMM	MF	MF	FF	FF	FF	FF	FF	MF	notFF	MF	MF	MF	MF	MF	MF	MF	MF	MF	MF	MF	MF	MF	MF	notMM	MF	MF	MF	MF	MF	MF	MF	MF	MF	MF	MF	MF	MF	MF	MF	MF
FtcF2_1_23	notMM	MF	notFF	MF	MF	MF	notMM	MM	notFF	NA	MF	MF	MF	MM	MF	MF	MF	MF	MF	MF	MF	MF	MF	MF	MF	MF	MF	MF	MF	MF	MF	MF	MF	MF	MF	MF	MF	MF	MF	MF	MF	MF	MF	MF	MF	MF	MF	MF	MF
FtcF2_1_24	MM	MM	MM	MM	MM	MM	MM	notFF	MM	notFF	MM	MM	MM	MM	MM	MM	MM	MM	MM	MM	MM	MM	MM	MM	MM	MM	MM	MM	MM	MM	MM	MM	notFF	MM	MM	MM	MM	MM	MM	MM	MM	MM	MM	MM	MM	MM	MM	MM	MM
FtcF2_1_25	MF	MF	MF	MF	MF	MF	notFF	MF	MF	notMM	MF	MF	MF	MF	MF	MF	MF	MF	MF	MF	MF	MF	MF	MF	MF	MF	MF	MF	MF	FF	MF	FF	FF	FF	FF	FF	FF	FF	FF	FF	FF	FF	FF	FF	FF	FF	FF	FF	MF
FtcF2_1_26	MF	MF	notMM	MF	MF	MF	MF	notFF	MF	NA	MF	MF	MM	MM	MM	MM	MM	MM	MM	MM	MM	MM	MM	MM	MM	MM	MM	MM	MM	MM	MM	MM	MM	MM	MM	MM	MM	MM	MM	MM	MM	MM	MM	MM	MM	MM	MM	MM	MM
FtcF2_1_27	notMM	FF	notMM	FF	FF	FF	notMM	FF	FF	FF	FF	FF	MF	MF	MF	MF	MF	MF	MF	MF	MF	MF	MF	MF	MF	MF	MF	MF	MF	MF	MF	MF	MF	MF	MF	MF	MF	MF	MF	MF	MF	MF	MF	MF	MF	MF	MF	MF	MF
FtcF2_1_28	notFF	MF	MF	MF	MF	MF	MF	MF	MF	notMM	MF	MF	MF	MF	MF	MF	MF	notFF	MF	MF	MF	MF	MF	MF	MF	MF	MF	MF	MM	MM	MM	MM	notFF	MM	MM	MM	MM	MM	MM	notFF	MM	MM	MM	MM	MM	MM	MM	MM	MM
FtcF2_1_29	notFF	notMM	notMM	MF	notFF	MF	MF	notFF	notFF	MM	MM	MM	MM	MF	MF	MF	MF	notFF	MF	MF	MF	MF	MF	MF	MF	MF	MF	MF	MF	MM	MF	notFF	MF	MF	MF	MF	MF	MF	MF	MF	MF	MF	MF	MF	MF	MF	MF	MF	MF
FtcF2_1_30	MF	MF	MF	MF	MF	MF	MF	MF	MF	MF	MF	MF	MF	MF	MF	MF	MF	MF	MF	MF	MF	MF	MF	MF	MF	MF	MF	MF	MF	MF	MF	MF	MF	MF	MF	MF	MF	MF	MF	MF	MF	MF	MF	MF	MF	MF	MF	MF	MF
FtcF2_1_31	MM	MM	notFF	MM	MM	MM	notFF	notFF	notFF	MM	MM	MM	MM	MM	MF	MF	MF	MF	MF	MF	MF	MF	MF	MF	MF	MF	MF	MF	MF	MF	MF	MF	MF	MF	MF	MF	MF	MF	MF	MF	MF	MF	MF	MF	MF	MF	MF	MF	MF
FtcF2_1_32	notFF	notFF	MF	MF	MF	MF	notFF	notFF	MF	MF	MF	MF	MF	MF	MF	MF	MF	MF	notMM	MF	MF	MF	MF	MF	MF	MF	MF	MF	MF	MF	MF	MF	FF	MF	MF	MF	MF	MF	MF	notFF	MF	MF	MF	MF	MF	MF	MF	MF	MF
FtcF2_1_33	MF	MF	notMM	MF	MF	MF	MF	MF	MF	MF	MF	MF	MF	MF	MF	MF	MF	MF	MF	MF	MF	MF	MF	MF	MF	MF	MF	MM	MM	MM	MM	MM	MM	MM	MM	MM	MM	MM	MM	MM	MM	MM	MM	MM	MM	MM	MM	MM	MM
FtcF2_1_34	MF	MF	MF	MF	MF	MF	MM	MF	MF	MF	MF	MF	MF	MF	MF	MF	MF	MF	MF	MF	MF	MF	MF	MF	MF	MF	MF	MF	MF	MF	MF	MF	MF	MF	MF	MF	MF	MF	MF	MF	MF	MF	MF	MF	MF	MF	MF	MF	MF
FtcF2_1_35	MF	MF	MF	MF	MF	MF	MF	MF	MF	MF	MF	MF	MF	MF	MF	MF	MF	MF	MF	MF	MF	MF	MF	MF	MF	MF	MF	MF	MF	MF	MF	MF	MF	MF	MF	MF	MF	MF	MF	MF	MF	MF	MF	MF	MF	MF	MF	MF	MF
FtcF2_1_36	MF	MF	MF	MF	MF	MF	MF	MF	MF	MF	MF	MF	MF	MF	MF	MF	MF	MF	MF	MF	MF	MF	MF	MF	MF	MF	MF	MF	MF	MF	MF	MF	MF	MF	MF	MF	MF	MF	MF	MF	MF	MF	MF	MF	MF	MF	MF	MF	MF
FtcF2_1_37	MF	MF	MF	MF	MF	MF	MF	MF	MF	MF	FF	FF	FF	FF	FF	FF	FF	FF	FF	FF	FF	FF	FF	FF	FF	FF	FF	FF	FF	FF	FF	FF	FF	FF	FF	FF	FF	FF	FF	FF	FF	FF	FF	FF	FF	FF	FF	FF	FF
FtcF2_1_38	MF	MF	MF	MF	MF	MF	MF	MF	MF	MF	MF	MF	MF	MF	MF	MF	MF	MF	MF	MF	MF	MF	MF	MF	MF	MF	MF	MF	MF	MF	MF	MF	MF	MF	MF	MF	MF	MF	MF	MF	MF	MF	MF	MF	MF	MF	MF	MF	MF
FtcF2_1_39	FF	FF	FF	FF	FF	FF	FF	FF	FF	FF	FF	FF	FF	FF	FF	FF	FF	FF	FF	FF	FF	FF	FF	FF	FF	FF	FF	FF	FF	MF	FF	MF	MF	MF	MF	MF	MF	MF	MF	MF	MF	MF	MF	MF	MF	MF	MF	FF	FF
FtcF2_1_40	MM	MF	MF	MF	MF	MF	MF	notFF	MF	MF	MF	MF	MF	MF	MF	MF	MF	MF	MF	MF	MF	MF	MF	MF	MF	MF	MF	MF	MF	MF	MF	MF	MF	MF	MF	MF	MF	MF	MF	MF	MF	MF	MF	MF	MF	MF	MF	MF	MF
FtcF2_1_41	MF	MF	MF	MF	MF	MF	MF	MF	MF	MF	MF	MF	MF	MF	MF	MF	MF	MF	MF	FF	FF	FF	FF	FF	FF	FF	FF	FF	FF	FF	FF	FF	FF	FF	FF	FF	FF	FF	FF	FF	FF	FF	FF	FF	FF	FF	FF	FF	FF
FtcF2_1_42	MF	MF	MF	MF	MF	MF	MF	MF	MF	MF	MF	MF	MF	MF	MF	MF	MF	MF	MF	MF	MF	MF	MF	MF	MF	MF	MF	MF	MF	FF	MF	MF	MF	MF	MF	MF	MF	MF	MF	MF	MF	MF	MF	MF	MF	MF	MF	MF	MF
FtcF2_1_43	MF	MF	MF	MF	MF	MF	MF	MF	MF	MF	MF	MF	MF	MF	MF	MF	MF	MF	MF	MF	MF	MF	MF	MM	MM	MM	MM	MM	MM	MM	MM	MM	MM	MM	MM	MM	MM	MM	MM	MM	MM	MM	MM	MM	MM	MM	MM	MM	MM
FtcF2_1_44	MF	MF	MF	MF	MF	MF	MF	MF	MF	MF	MF	MF	MF	MF	MF	MF	MF	MF	MF	MF	MF	FF	FF	FF	FF	FF	FF	FF	FF	FF	FF	FF	FF	FF	FF	FF	FF	FF	FF	FF	FF	FF	FF	FF	FF	FF	FF	FF	FF
FtcF2_1_45	MF	MF	MF	MF	MF	MF	FF	FF	FF	FF	FF	FF	FF	FF	FF	FF	FF	FF	FF	FF	FF	FF	FF	FF	FF	FF	FF	FF	FF	FF	FF	FF	FF	FF	FF	FF	FF	FF	FF	FF	FF	FF	FF	FF	FF	FF	FF	FF	FF
FtcF2_1_46	MM	MM	MM	MM	MM	MM	MM	MM	MM	MM	MM	MM	MF	MF	MF	MF	MF	MF	MF	MF	MF	FF	FF	FF	FF	FF	FF	FF	FF	FF	FF	FF	FF	FF	FF	FF	FF	FF	FF	FF	FF	FF	FF	FF	FF	FF	FF	FF	FF
FtcF2_1_47	MF	MF	MF	MF	MF	MF	MF	MF	MF	MF	MF	MM	MM	MM	MM	MM	MM	MM	MM	MM	MM	MM	MM	MM	MM	MM	MM	MM	MM	MM	MM	MM	MM	MM	MM	MM	MM	MM	MM	MM	MM	MM	MM	MM	MM	MM	MM	MM	MM
FtcF2_1_48	MF	MF	MF	MF	MF	MF	MF	MF	MF	MF	MF	MF	MF	MF	MF	MF	MF	MF	MF	MF	MF	MF	MF	MF	MF	MF	MF	MF	MF	MF	MF	MF	MF	MF	MF	MF	MF	MF	MF	MF	MF	MF	MF	MF	MF	MF	MF	MF	MF
FtcF2_1_49	FF	FF	FF	FF	FF	FF	FF	FF	FF	FF	FF	FF	FF	MF	MF	MF	MF	MF	MF	MF	MF	MF	MF	MF	MF	MF	MF	MF	MF	MF	MF	MF	MF	MF	MF	MF	MF	MF	MF	MF	MF	MF	MF	MF	MF	MF	MF	MF	MF
FtcF2_1_50	notFF	notFF	notFF	MM	notFF	MM	MM	notFF	MM	notFF	MF	MF	MF	notMM	notMM	MF	MF	NA	MF	MF	MF	MF	MF	MF	MF	MF	MF	MF	MF	MF	MF	MF	MF	MF	MF	MF	MF	MF	MF	MF	MF	MF	MF	MF	MF	MF	MF	MF	MF
FtcF2_1_51	MF	notFF	notFF	MF	MF	MM	notMM	notFF	NA	MF	MF	MF	MF	MF	MF	MF	MF	MF	MF	MF	MF	MF	MF	MF	MF	MF	MF	MF	MF	MF	MF	MF	notFF	MF	MF	MF	MF	MF	MF	MF	MF	MF	MF	MF	MF	notMM	MF	MF	MF
FtcF2_1_52	MF	MF	MF	MF	MF	MF	MF	MF	MF	MF	MF	MF	FF	FF	FF	FF	FF	FF	FF	FF	FF	FF	FF	FF	FF	FF	FF	FF	FF	FF	FF	FF	FF	FF	FF	FF	FF	FF	FF	FF	FF	FF	FF	FF	FF	FF	FF	FF	FF
FtcF2_1_53	MF	MF	MF	MF	MF	MF	MF	MF	MF	notFF	MF	MF	MF	MF	MF	MF	MF	MF	FF	FF	FF	FF	FF	FF	FF	FF	FF	FF	FF	FF	FF	FF	FF	FF	FF	FF	FF	FF	FF	FF	FF	FF	FF	FF	FF	FF	FF	FF	FF
FtcF2_1_54	MM	MM	MM	MM	MM	MM	MM	MM	MM	MM	MF	MF	MF	MF	MF	MF	MF	MF	MF	MF	MF	MF	MF	MF	MF	MF	MF	MF	MF	MF	MF	MF	MF	MF	MF	MF	MF	MF	MF	MF	MF	MF	MF	MF	MF	MF	MF	MF	MF
FtcF2_1_55	MF	MF	MF	MF	MF	MF	MF	MF	MF	MF	MF	MF	MF	MF	FF	FF	FF	FF	FF	FF	FF	FF	FF	FF	FF	FF	FF	FF	FF	FF	FF	FF	FF	FF	FF	FF	FF	FF	FF	FF	FF	FF	FF	FF	FF	FF	FF	FF	FF
FtcF2_1_56	MF	MF	MF	MF	MF	MF	MF	MF	MF	notFF	notMM	FF	MF	MF	MF	MF	MF	MF	MF	MF	MF	MF	MF	MF	MF	MF	MF	MF	MF	MF	MF	MF	MF	MF	MF	MF	MF	MF	MF	MF	MF	MF	MF	MF	MF	MF	MF	MF	MF
FtcF2_1_57	FF	FF	FF	FF	FF	FF	FF	FF	FF	FF	FF	MF	MF	MF	MF	MF	MF	MF	MF	MM	MM	MM	MM	MM	MM	MM	MM	MM	MM	MM	MM	MM	MM	MM	MM	MM	MM	MM	MM	MM	MM	MM	MM	MM	MM	MM	MM	MM	MM
FtcF2_1_58	MF	MF	MF	MF	MM	MM	MM	MM	MM	MM	MM	MM	MM	MM	MM	MM	MM	MM	MM	MM	MM	MM	MM	MM	MM	MM	MM	MM	MM	MM	MM	MM	MM	MM	MM	MM	MM	MM	MM	MM	MM	MM	MM	MM	MM	MM	MM	MM	MM
FtcF2_1_59	MF	MF	MF	MF	MF	MF	MF	MF	MF	MF	MF	MF	MF	MF	MF	MF	MF	MF	MF	MF	MF	MF	MF	MF	MF	MF	MF	MF	MF	MF	MF	MF	MF	MF	MF	MF	MF	MF	MF	MF	MF	MF	MF	MF	MF	MF	MF	MF	MF
FtcF2_1_60	MM	MM	MM	MM	MM	MM	MM	MM	MM	notFF	MM	MM	MM	MM	MM	MM	MM	MM	MM	MM	MM	MM	MM	MM	MM	MM	MM	MM	MM	MM	MM	MM	MM	MM	MM	MM	MM	MM	MM	MM	MM	MM	MM	MM	MM	MM	MM	MM	MM
FtcF2_1_61	NA	NA	notFF	notFF	notFF	notFF	NA	notFF	NA	NA	notFF	MM	notFF	NA	NA	notFF	notFF	NA	notFF	notFF	MM	MM	MM	MM	notFF	MM	MM	MM	MM	MM	MM	notFF	notFF	MM	MM	MM	MM	MM	MM	notFF	notFF	MM	notFF	MM	MM	notFF	MM	MM	MM
FtcF2_1_62	notFF	NA	NA	MF	notMM	notFF	NA	NA	NA	notMM	notFF	notMM	MF	notMM	notFF	MF	notFF	NA	notFF	notFF	notFF	MM	MM	notFF	MM	MM	MM	MM	MM	MM	MM	notFF	NA	notFF	MM	MM	MM	notFF	notFF	NA	MM	notFF	notFF	MM	MM	notFF	notFF	notFF	MF
FtcF2_1_63	MM	MM	MM	MM	MM	MM	MM	MM	MM	notFF	MM	MM	MF	MF	MF	MF	MF	MF	MF	MF	MF	MF	MF	MF	MF	MF	MF	MF	MF	MF	MF	MF	MF	MF	MF	MF	MF	MF	MF	MF	MF	MF	MF	MF	MF	MF	MF	MF	MF
FtcF2_1_64	NA	notMM	notMM	NA	notMM	notMM	notMM	NA	notMM	NA	notMM	notMM	NA	NA	notMM	notMM	notMM	NA	notMM	notMM	FF	notMM	FF	FF	FF	FF	FF	FF	notMM	FF	FF	FF	notMM	FF	FF	FF	FF	notMM	notMM	NA	notMM	FF	notMM	FF	FF	FF	NA	FF	FF
FtcF2_1_65	notMM	FF	FF	notMM	FF	notMM	notMM	notMM	notMM	notMM	FF	FF	FF	FF	notMM	FF	FF	FF	FF	FF	FF	FF	FF	FF	FF	FF	FF	FF	FF	MF	MF	MF	notFF	MF	MF	MF	MF	notMM	MF	MF	MF	MF	MF	MF	MF	MF	MF	MF	MF
FtcF2_1_66	notMM	notFF	MF	MF	MF	MF	notMM	FF	notMM	notMM	FF	FF	FF	FF	FF	MF	MF	MF	MF	MF	MF	MF	MF	MF	MF	MF	MF	MF	MF	MF	MF	MF	MF	MF	MF	MF	MF	MF	MF	MF	MF	MF	MF	MF	MF	MF	MF	MF	MF
FtcF2_1_67	notMM	notFF	NA	notMM	notMM	notMM	NA	NA	NA	NA	notFF	notMM	notMM	NA	notFF	notMM	NA	NA	notMM	FF	MF	MF	MF	MF	MF	MF	MF	notFF	MF	notMM	MF	MF	MF	notFF	notFF	MF	MF	MF	MF	MF	notMM	MF	notFF	NA	notMM	notFF	MF	MF	MF
FtcF2_1_68	notMM	FF	notMM	FF	FF	FF	notMM	notMM	notMM	notMM	MF	MF	MF	notMM	MF	MF	MF	notMM	notFF	MF	MF	MF	MF	MF	MF	MF	MF	MF	MF	MF	MF	MF	MF	MF	MF	MF	MF	MF	MF	MF	MF	MF	MF	MF	MF	MF	MF	MF	MF
FtcF2_1_69	notFF	notFF	notFF	MM	MM	notFF	notFF	notFF	notFF	notFF	MM	MF	MF	MF	MF	MF	notFF	MF	notMM	MF	MF	MF	MF	MF	MF	MF	MF	MF	MF	MF	MF	MF	notFF	MF	MF	MF	MF	MF	MF	MF	MF	MF	MF	MF	MF	MF	MF	MF	MF
FtcF2_1_70	NA	NA	notFF	MF	MM	notFF	NA	NA	notFF	NA	notFF	MM	notFF	NA	NA	FF	notMM	NA	notFF	MF	MF	notFF	MF	notFF	MF	MF	MF	MF	notFF	notMM	MM	notMM	NA	notFF	FF	MF	MF	notMM	notMM	notFF	notFF	MF	MF	notFF	MF	notMM	notMM	notMM	notMM
FtcF2_1_71	MF	notMM	MF	MF	MF	notFF	notFF	notFF	NA	NA	MF	MF	MF	MF	notMM	notMM	FF	NA	FF	FF	FF	FF	FF	FF	FF	FF	FF	FF	FF	FF	FF	FF	notMM	FF	FF	FF	FF	FF	FF	notMM	FF	FF	FF	FF	FF	notMM	FF	FF	FF
FtcF2_1_72	NA	notFF	NA	MF	NA	notFF	NA	NA	notMM	NA	MF	MF	MF	MF	notMM	notMM	notMM	NA	notMM	NA	FF	notMM	FF	FF	FF	FF	FF	FF	FF	FF	FF	notMM	NA	notMM	FF	FF	FF	FF	notMM	notMM	notMM	FF	NA	FF	notMM	notMM	notFF	FF	FF
FtcF2_1_73	notFF	notFF	notFF	MM	notFF	MM	MM	notFF	notFF	NA	MM	MM	MM	MM	MM	MM	MM	notFF	notFF	MM	MM	MM	MM	MM	MM	MM	MM	MM	MM	MM	MM	MM	notFF	MM	MM	MM	MM	MM	MM	MM	MM	MM	MM	MM	MM	MM	MM	MM	MM
FtcF2_1_74	NA	MM	notFF	MM	notFF	notFF	MM	notFF	notFF	MM	notFF	MF	MF	MF	notFF	MF	MF	MF	MF	MF	MF	MF	MF	MF	MF	MF	MF	MF	MF	FF	FF	FF	notMM	FF	FF	FF	FF	FF	FF	FF	FF	FF	FF	FF	FF	FF	MF	FF	FF
FtcF2_1_75	NA	notFF	notFF	MF	notMM	notFF	notMM	notMM	notMM	notMM	FF	FF	FF	FF	notMM	FF	notMM	notMM	notMM	FF	FF	FF	FF	FF	FF	FF	FF	FF	FF	FF	FF	FF	notMM	FF	FF	FF	FF	FF	notMM	FF	notMM	FF	FF	FF	FF	notMM	FF	FF	FF
FtcF2_1_76	notFF	MF	notFF	MF	notMM	MF	MF	notFF	notFF	notFF	MM	MM	MM	notFF	MM	MM	MM	notFF	notFF	MF	MM	MM	MM	MM	MM	MM	MM	MM	MM	MM	MM	notFF	notFF	MM	MM	MM	MM	MM	MM	notFF	MM	MM	MM	MM	MM	MM	MM	MM	MM
FtcF2_1_77	notFF	MF	NA	notFF	NA	MF	NA	NA	NA	notMM	MF	notMM	notMM	NA	NA	notFF	MF	notMM	NA	MF	MF	MF	MF	MF	notMM	MF	MF	MF	notFF	MF	MF	notMM	NA	notMM	MF	MF	MF	notMM	MF	notMM	NA	MF	notFF	MF	MF	notMM	notMM	MF	MF
FtcF2_1_78	MF	notMM	MF	MF	notFF	notMM	NA	NA	notMM	notFF	MF	MF	MF	MF	MF	MF	MF	notFF	MF	MF	MF	MF	MF	MF	MF	MF	MF	MF	MF	MF	MF	MF	MF	MF	MF	MF	MF	MF	MF	notFF	MF	MF	MF	notFF	MF	MF	MF	MF	MF
FtcF2_1_79	NA	notFF	notFF	notFF	MM	notFF	NA	notFF	notFF	notFF	MM	MM	MF	MF	notFF	notFF	notFF	notFF	MF	MF	MF	MF	MF	MF	MF	MF	MF	MF	MF	MF	MF	MF	notMM	MF	MF	MF	MF	MF	MF	MF	MF	MF	MF	MF	MF	notMM	MF	MF	MF
FtcF2_1_80	FF	FF	notMM	FF	notMM	MF	MF	MF	notFF	notFF	MF	MF	MF	notMM	MF	MF	MF	notFF	MM	MM	MM	MM	MM	MM	MM	MM	MM	MM	MM	MM	MM	MM	MF	MM	MM	MM	MM	MM	MM	MM	MM	MM	notFF	MM	MM	MM	MM	MM	MM
FtcF2_1_81	notMM	notMM	MF	MF	notFF	MF	MF	MF	notFF	notFF	MF	MF	FF	FF	FF	FF	FF	FF	FF	FF	FF	FF	FF	FF	FF	FF	FF	FF	FF	FF	FF	FF	FF	FF	FF	FF	FF	FF	FF	FF	FF	FF	FF	FF	FF	MF	FF	FF	FF
FtcF2_1_82	MF	MF	MF	notFF	notMM	notMM	notMM	notMM	FF	notMM	MF	MF	MF	MF	MF	MF	MF	notMM	MF	MF	MF	MF	MF	MF	MF	MF	MF	MF	MF	MF	MF	MF	notMM	MF	MF	MF	MF	MF	MF	MF	MF	MF	MF	MF	MF	notFF	MF	MF	MF
FtcF2_1_83	notMM	FF	FF	FF	FF	FF	notMM	notMM	FF	NA	FF	FF	FF	FF	FF	FF	FF	FF	FF	FF	FF	FF	FF	FF	FF	FF	FF	FF	FF	FF	FF	FF	notMM	FF	FF	FF	FF	FF	FF	FF	FF	FF	FF	FF	FF	FF	FF	FF	FF
FtcF2_1_84	MF	MF	MF	MF	MF	MF	MF	MF	MF	MF	MF	MM	MM	MM	MM	MM	MM	MM	MM	MM	MM	MM	MM	MM	MM	MM	MM	MM	MM	MM	MM	MM	MM	MM	MM	MM	MM	MM	MM	MM	MM	MM	MM	MM	MM	MM	MM	MM	MM
FtcF2_1_85	notMM	notMM	MF	MF	MF	MF	notFF	MF	notMM	notMM	FF	FF	FF	FF	FF	FF	FF	notMM	FF	FF	FF	FF	FF	FF	FF	FF	FF	FF	FF	FF	FF	FF	FF	FF	FF	FF	FF	FF	FF	FF	FF	FF	FF	FF	FF	FF	FF	FF	FF
FtcF2_1_86	MM	notFF	MM	MM	MM	MM	notFF	notFF	MM	notFF	MF	MF	MF	MF	MF	MF	MF	notFF	MF	MF	MF	MF	MF	MF	MF	MF	MF	MF	MF	MF	MF	MF	MF	MF	MF	MF	MF	MF	MF	MF	MF	MF	MF	MF	MF	MF	MF	MF	MF
FtcF2_1_87	MF	MF	MF	MF	MF	MF	MF	MF	MF	MF	MF	MF	MF	MF	MF	MF	MF	MF	MF	MF	MF	MF	MF	MF	MF	MF	MF	MF	MF	MF	MF	MF	MF	MF	MF	MF	MF	MF	MF	MF	MF	MF	MF	MF	MF	MF	MF	MF	MF
FtcF2_1_88	MM	notMM	MM	MF	MF	MF	notMM	notMM	notFF	MF	notMM	FF	MF	MF	MF	notMM	notMM	MF	MF	MF	MF	MF	MF	MF	MF	MF	MF	MF	MF	MF	MF	MF	notFF	MF	MF	MF	MF	MF	MF	MF	MF	MF	MF	MF	MF	MF	MF	MF	MF
FtcF2_1_89	MF	MF	MF	MF	MF	MF	notMM	MF	MF	MF	MF	MF	MF	MF	MF	MF	MF	MF	MF	MF	MF	MF	MF	MF	MF	MF	MF	MF	MF	MF	MF	MF	MF	MF	MF	MF	MF	MF	MF	MF	MF	MF	MF	MF	MF	MF	MF	MF	MF
FtcF2_1_90	MM	MM	MM	MM	MM	MM	MF	MF	MF	MF	MF	MF	MF	MF	MF	MF	MF	MF	MF	MF	MF	MF	MF	MF	MF	MF	MF	MF	FF	FF	FF	FF	FF	FF	FF	FF	FF	FF	FF	FF	FF	FF	FF	FF	FF	FF	FF	FF	FF
FtcF2_1_91	FF	FF	FF	FF	FF	FF	FF	FF	FF	FF	FF	FF	FF	FF	FF	FF	FF	FF	FF	FF	FF	FF	FF	FF	FF	FF	FF	FF	FF	MF	FF	MF	notFF	MF	MF	MF	MF	MF	MF	MF	MF	MF	MF	MF	MF	MF	MF	FF	FF
FtcF2_1_92	FF	FF	FF	FF	FF	FF	FF	FF	FF	FF	FF	FF	FF	FF	FF	FF	FF	FF	FF	FF	FF	FF	FF	FF	FF	FF	FF	FF	FF	FF	FF	FF	FF	FF	FF	FF	FF	FF	FF	FF	FF	FF	FF	FF	FF	FF	FF	FF	FF
FtcF2_1_93	FF	FF	FF	FF	FF	FF	FF	notMM	FF	notMM	FF	FF	MF	MF	MF	MF	MF	MF	MF	MF	MF	MF	MF	MF	MF	MF	MF	MF	MF	MF	MF	MF	MF	MF	MF	MF	MF	MF	MF	MF	MF	MF	MF	MF	MF	MF	MF	MF	MF
FtcF2_1_94	MF	MF	MF	MF	MF	MF	MF	MF	MF	MF	MF	FF	FF	FF	FF	FF	FF	FF	FF	FF	FF	FF	FF	FF	FF	FF	FF	FF	FF	FF	FF	FF	FF	FF	FF	FF	FF	FF	FF	FF	FF	FF	FF	FF	FF	FF	FF	FF	FF
FtcF2_1_95	MM	MM	MM	MM	MM	MM	MM	MM	MM	MF	MF	MF	MF	MF	MF	MF	MF	MF	MF	MF	MF	MF	MF	MF	MF	MF	MF	MF	MF	FF	FF	FF	FF	FF	FF	FF	FF	FF	FF	FF	FF	FF	FF	FF	FF	FF	FF	FF	FF
FtcF2_1_96	MF	MF	MF	MF	MF	MF	MF	MF	MF	MF	MF	MF	MF	MF	MF	MF	MF	MF	MF	MF	MF	MF	MF	MF	MF	MF	MF	MF	MF	MF	MF	MF	MF	MF	MF	MF	MF	MF	MF	MF	MF	MF	MF	MF	MF	MF	MF	MF	MF
FtcF2_1_97	MF	MF	MF	FF	FF	FF	FF	FF	FF	FF	FF	FF	FF	FF	FF	FF	FF	FF	FF	FF	FF	FF	FF	FF	FF	FF	FF	FF	FF	FF	FF	FF	FF	FF	FF	FF	FF	FF	FF	FF	FF	FF	FF	FF	FF	FF	FF	FF	FF
FtcF2_1_98	MF	MF	MF	MF	MF	MF	MF	MF	MF	MF	MF	MF	MF	MF	MF	MF	MF	MF	MF	MF	MF	MF	MF	MF	MF	MF	MF	MF	MF	MF	MF	MF	MF	MF	MF	MF	MF	MF	MF	MF	MF	MF	MF	MF	MF	MF	MF	MF	MF
FtcF2_1_99	MM	MM	MM	MM	MM	MM	MM	MM	MM	notFF	MM	MM	MF	MF	MF	FF	FF	FF	FF	FF	FF	FF	FF	FF	FF	FF	FF	FF	FF	FF	FF	FF	FF	FF	FF	FF	FF	FF	FF	FF	FF	FF	FF	FF	FF	FF	FF	FF	FF
FtcF2_1_100	MF	MF	MF	MM	MM	MM	MM	MM	MM	MM	MM	MM	MM	MM	MM	MM	MM	MM	MM	MM	MM	MM	MF	MF	MF	MF	MF	MF	MF	MF	MF	MF	MF	MF	MF	MF	MF	MF	MF	MF	MF	MF	MF	MF	MF	MF	MF	MF	MF
FtcF2_1_101	MF	MF	MF	MF	MF	MF	MF	MF	MF	MF	MF	MF	FF	FF	FF	FF	FF	FF	FF	FF	FF	FF	FF	FF	FF	FF	FF	FF	FF	FF	FF	FF	FF	FF	FF	FF	FF	FF	FF	FF	FF	FF	FF	FF	FF	FF	FF	FF	FF
FtcF2_1_102	MF	MF	MF	MF	MF	MF	MF	MF	MF	MF	MF	MF	FF	FF	FF	FF	FF	FF	FF	FF	FF	FF	FF	FF	FF	FF	FF	FF	FF	FF	FF	FF	FF	FF	FF	FF	FF	FF	FF	FF	FF	FF	FF	FF	FF	FF	FF	FF	FF
FtcF2_1_103	MF	MF	MF	MF	MF	MF	MF	MF	MF	MF	MF	MF	MF	MF	MF	MF	MF	MF	MF	MF	MF	MF	MF	MF	MF	MF	MF	MF	MF	MF	MF	MF	MF	MF	MF	MF	MF	MF	MF	MF	MF	MF	MF	MF	MF	MF	MF	MF	MF
FtcF2_1_104	MF	MM	MM	MM	MM	MM	MM	MM	MM	MM	MM	MM	MM	MM	MM	MM	MM	MM	MM	MM	MM	MM	MM	MM	MM	MM	MM	MM	MM	MM	MM	MM	MM	MM	MM	MM	MM	MM	MM	MM	MM	MM	MM	MM	MM	MM	MM	MM	MM
FtcF2_1_105	MM	MM	MM	MM	MM	MM	MM	MM	MM	MM	MM	MF	MF	MF	MF	MF	MF	MF	MF	MF	MF	MF	MF	MF	MF	MF	MF	MF	MF	MF	MF	MF	MF	MF	MF	MF	MF	MF	MF	MF	MF	MF	MF	MF	MF	MF	MF	MF	MF
FtcF2_1_106	MF	MF	MF	MF	MF	MF	MF	MF	MF	MF	MF	MF	MF	MF	MF	MF	MF	MF	MF	MF	MF	MF	MF	MF	MF	MF	MF	MF	MF	MF	MF	MF	MF	MF	MF	MF	MF	MF	MF	MF	MF	MF	MF	MF	MF	MF	MF	MF	MF
FtcF2_1_107	MM	MM	MM	MM	MM	MM	MM	MM	MM	MM	MM	MM	MM	MM	MM	MF	MF	MF	MF	MF	MF	MF	MF	MF	MF	MF	MF	MF	MF	MF	MF	MF	MF	MF	MF	MF	MF	MF	MF	MF	MF	MF	MF	MF	MF	MF	MF	MF	MF
FtcF2_1_108	MM	MM	MM	MM	MM	MM	MM	MM	MM	MM	MM	MM	MM	MM	MM	MM	MM	MM	MM	MM	MM	MM	MM	MM	MM	MM	MM	MM	MM	MF	MF	MF	MF	MF	MF	MF	MF	MF	MF	MF	MF	MF	MF	MF	MF	MF	MF	MF	MF
FtcF2_2_2	NA	notFF	NA	notFF	MM	notFF	NA	notFF	notFF	notFF	MM	MM	MM	notFF	notFF	MM	MM	notFF	notFF	MM	MM	MM	MM	MM	MM	MM	MM	MM	MM	MM	MM	MM	notFF	MM	MM	MM	MM	MM	MM	MM	MM	MM	MM	MM	MM	notFF	MM	MM	MM
FtcF2_2_3	FF	FF	FF	FF	FF	FF	FF	notMM	FF	FF	FF	FF	FF	FF	FF	FF	FF	FF	MF	MF	MF	MF	MF	MF	MF	MF	MF	MF	MF	MF	MF	MF	MF	MF	MF	MF	MF	MF	MF	MF	MF	MF	MF	MF	MF	MF	MF	MF	MF
FtcF2_2_4	MF	MF	MF	MF	MF	MF	MF	MF	MF	MF	MF	FF	FF	FF	FF	FF	FF	FF	FF	FF	FF	FF	FF	FF	FF	FF	FF	FF	FF	FF	FF	FF	FF	FF	FF	FF	FF	FF	FF	FF	FF	FF	FF	FF	FF	FF	FF	FF	FF
FtcF2_2_5	FF	FF	FF	FF	FF	FF	FF	FF	FF	FF	MF	MM	MM	MM	MM	MM	MM	MM	MM	MM	MM	MM	MM	MM	MM	MM	MM	MM	MM	MM	MM	MM	MM	MM	MM	MM	MM	MM	MM	MM	MM	MM	MM	MM	MM	MM	MM	MM	MM
FtcF2_2_6	MF	MF	MF	MF	MF	MF	MF	MF	MF	MF	MF	MF	MF	MF	MF	MF	MF	MF	MF	MF	MF	MF	MF	MF	MF	MF	MF	MF	MF	MF	MF	MF	MF	MF	MF	MF	MF	MF	MF	MF	MF	MF	MF	MF	MF	MF	MF	MF	MF
FtcF2_2_7	MM	MM	MM	MM	MM	MM	MM	MM	MM	MM	MM	MM	MM	MM	MM	MM	MM	MM	MM	MM	MM	MM	MM	MM	MM	MM	MM	MM	MM	MM	MM	MM	MM	MM	MM	MM	MM	MM	MM	MM	MM	MM	MM	MM	MM	MM	MM	MM	MM
FtcF2_2_8	MF	MF	MF	MF	MF	MF	MF	MF	MM	MM	MM	MM	MM	MM	MM	MF	MF	MF	MF	MF	MF	MF	MF	MF	MF	MF	MF	MF	MF	MF	MF	MF	MF	MF	MF	MF	MF	MF	MF	MF	MF	MF	MF	MF	MF	MF	MF	MF	MF
FtcF2_2_9	MF	MF	MF	MF	MF	MF	MF	MF	MF	MF	MF	MF	MF	MF	MF	MM	MM	MM	MM	MM	MM	MM	MM	MM	MM	MM	MM	MM	MM	MM	MM	MM	MM	MM	MM	MM	MM	MM	MM	MM	MM	MM	MM	MM	MM	MM	MM	MM	MM
FtcF2_2_10	MM	MM	MM	MM	MM	MM	MM	MM	MM	MM	MM	MM	MM	MM	MM	MM	MM	MM	MM	MM	MM	MM	MM	MM	MM	MM	MM	MM	MM	MM	MM	MM	MM	MM	MM	MM	MM	MM	MM	MM	MM	MM	MM	MM	MM	MM	MM	MM	MM
FtcF2_2_11	MF	MF	MF	MF	MF	MF	MF	MF	MF	MF	MF	MF	MF	MF	MF	MF	MF	MF	MF	MF	MF	MF	MF	MF	MF	MF	MF	MF	MF	MF	MF	MF	MF	MF	MF	MF	MF	MF	MF	MF	MF	MF	MF	MF	MF	MF	MF	MF	MF
FtcF2_2_12	MM	MM	MM	MM	MM	MM	MM	MM	MM	notFF	MM	MM	MM	MM	MF	MF	MF	MF	MF	MF	MF	MF	MF	MF	MF	MF	MF	MF	MF	MF	MF	MF	MF	MF	MF	MF	MF	MF	MF	MF	MF	MF	MF	MF	MF	MF	MF	MF	MF
FtcF2_2_13	notFF	notMM	notFF	NA	notFF	notFF	notFF	notFF	MF	NA	notFF	NA	MM	notFF	notFF	MF	notFF	NA	notFF	notFF	notMM	MF	MF	MF	MF	notFF	MM	notFF	MF	MF	MF	MF	notFF	notFF	MM	MM	notFF	MM	notFF	notFF	MF	MF	notFF	MF	MF	notFF	MF	notFF	MF
FtcF2_2_14	NA	NA	NA	MF	MF	NA	NA	NA	NA	notMM	NA	notMM	MF	notFF	notMM	NA	MF	NA	notFF	notFF	MF	notFF	MF	MF	MM	MF	MF	MM	MF	MF	MM	notFF	notFF	MF	notFF	MF	notFF	NA	MF	notFF	notFF	notFF	NA	notFF	notFF	NA	MF	MF	MF
FtcF2_2_15	MM	MM	MM	MM	MM	MM	MM	MM	MM	MM	MM	MM	MF	MF	MF	MF	MF	MF	MF	MF	MF	MF	MF	MF	MF	MF	MF	MF	MF	MF	MF	MF	MF	MF	MF	MF	MF	MF	MF	MF	MF	MF	MF	MF	MF	MF	MF	MF	MF
FtcF2_2_16	MF	MF	MF	MF	MF	MF	MF	MF	MF	MF	MF	MF	MF	MF	MF	MF	MF	MF	MF	MF	MF	MF	MF	MF	MF	MF	MF	MF	MF	MF	MF	MF	MF	MF	MF	MF	MF	MF	MF	MF	MF	MF	MF	MF	MF	MF	MF	MF	MF
FtcF2_2_17	MF	MF	MF	FF	FF	FF	FF	FF	notMM	FF	FF	FF	FF	FF	FF	FF	FF	FF	FF	FF	FF	FF	FF	FF	FF	FF	FF	FF	FF	FF	FF	FF	FF	FF	FF	FF	FF	FF	FF	FF	FF	FF	FF	FF	FF	FF	FF	FF	FF
FtcF2_2_18	MF	MF	MF	MF	MF	MF	MF	MF	MF	MF	MF	MF	MF	MF	MF	MF	MF	MF	MF	MF	MF	MF	MF	MF	MF	MF	MF	MF	MF	MF	MF	MF	MF	MF	MF	MF	MF	MF	MF	MF	MF	MF	MF	MF	MF	MF	MF	MF	MF
FtcF2_2_19	FF	FF	FF	FF	FF	FF	FF	FF	FF	FF	FF	FF	FF	FF	FF	FF	FF	FF	FF	FF	FF	FF	FF	FF	FF	FF	FF	FF	FF	FF	FF	FF	FF	FF	FF	FF	FF	FF	FF	FF	FF	FF	FF	FF	FF	FF	FF	FF	FF
FtcF2_2_20	MM	MM	MM	MM	MM	MM	MM	MM	MM	MM	MM	MM	MM	MM	MM	MF	MF	MF	MF	MF	MF	MF	MF	MF	MF	MF	MF	MF	MF	MF	MF	MF	MF	MF	MF	MF	MF	MF	MF	MF	MF	MF	MF	MF	MF	MF	MF	MF	MF
FtcF2_2_21	MF	MF	MF	MF	MF	MF	MF	MF	MF	MF	MF	FF	FF	FF	FF	FF	FF	FF	FF	FF	FF	FF	FF	FF	FF	FF	FF	FF	FF	FF	FF	FF	FF	FF	FF	FF	FF	FF	FF	FF	FF	FF	FF	FF	FF	FF	FF	FF	FF
FtcF2_2_22	MM	MM	MM	MM	MM	MF	MF	MF	MF	MF	MF	MF	MF	MF	MF	MF	MF	MF	MF	MF	MF	MF	MF	MF	MF	MF	MF	MF	MF	MF	MF	MF	MF	MF	MF	MF	MF	MF	MF	MF	MF	MF	MF	MF	MF	MF	MF	MF	MF
FtcF2_2_23	MF	MF	MF	MF	MF	MF	notMM	MF	notMM	notMM	MF	MF	MF	MF	MF	MF	MF	MF	MF	MF	MF	MF	MF	MF	MF	MF	MF	MF	MF	MF	MF	MF	MF	MF	MF	MF	MF	MF	MF	MF	MF	MF	MF	MF	MF	MF	MF	MF	MF
FtcF2_2_24	FF	FF	FF	FF	FF	FF	FF	FF	FF	FF	FF	FF	FF	FF	FF	FF	FF	FF	FF	FF	FF	FF	FF	FF	FF	FF	FF	FF	FF	FF	FF	FF	FF	FF	FF	FF	FF	FF	FF	FF	FF	FF	FF	FF	FF	FF	FF	FF	FF
FtcF2_2_25	MM	MM	MM	MM	MM	MM	MM	MM	MM	MM	MM	MM	MM	MM	MM	MM	MM	MM	MM	MM	MM	MM	MM	MM	MM	MM	MM	MM	MM	MM	MM	MM	MM	MM	MM	MM	MM	MM	MM	MM	MM	MM	MM	MM	MM	MM	MM	MM	MM
FtcF2_2_26	FF	FF	FF	FF	FF	FF	FF	FF	FF	FF	FF	FF	FF	FF	FF	MF	MF	MF	MF	MF	MF	MF	MF	MF	MF	MF	MF	MF	MF	MF	MF	MF	MF	MF	MF	MF	MF	MF	MF	MF	MF	MF	MF	MF	MF	MF	MF	MF	MF
FtcF2_2_27	FF	FF	FF	FF	FF	FF	FF	FF	FF	FF	MF	MF	MF	MF	MF	MF	MF	MF	MF	MF	MF	MF	MF	MF	MF	MF	MF	MF	MF	MF	MF	MF	MF	MF	MF	MF	MF	MF	MF	MF	MF	MF	MF	MF	MF	MF	MF	MF	MF
FtcF2_2_28	MF	MF	MF	MF	MF	MF	MF	MF	MF	MF	MF	MF	MF	MF	MF	MF	MF	MF	MF	MF	MF	MF	MF	MF	MF	MF	MF	MF	MF	MF	MF	MF	MF	MF	MF	MF	MF	MF	MF	MF	MF	MF	MF	MF	MF	MF	MF	MF	MF
FtcF2_2_29	MF	MF	MF	MF	MF	MF	MF	MF	MF	MF	MF	FF	FF	FF	FF	FF	FF	FF	FF	FF	FF	FF	FF	FF	FF	FF	FF	FF	FF	MF	FF	MF	MF	MF	MF	MF	MF	MF	MF	MF	MF	MF	MF	MF	MF	MF	MF	MF	FF
FtcF2_2_30	MF	MF	MF	MF	MF	MF	MF	MF	MF	MF	MF	MF	MF	MF	MF	MF	MF	MF	MF	MF	MF	MF	MF	MF	MF	MF	MF	MF	MF	MF	MF	MF	MF	MF	MF	MF	MF	MF	MF	MF	MF	MF	MF	MF	MF	MF	MF	MF	MF
FtcF2_2_31	MM	MM	MM	MF	MF	MF	MF	MF	MF	MF	MF	MF	MF	MF	MF	MF	MF	MF	MF	MF	MF	MF	MF	MF	MF	MF	MF	MF	MF	MF	MF	MF	MF	MF	MF	MF	MF	MF	MF	MF	MF	MF	MF	MF	MF	MF	MF	MF	MF
FtcF2_2_32	MF	MF	MF	MF	MF	MF	MF	MF	MM	MM	MM	MM	MM	MM	MM	MM	MM	MM	MM	MM	MM	MM	MM	MM	MM	MM	MM	MM	MM	MM	MM	MM	MM	MM	MM	MM	MM	MM	MM	MM	MM	MM	MM	MM	MM	MM	MM	MM	MM
FtcF2_2_33	MF	MF	MF	MF	MF	MF	MF	MF	MF	MF	MF	MF	MF	MF	MF	MF	MF	MF	MF	MF	MF	MF	MF	MF	MF	MF	MF	MM	MM	MM	MM	MM	MM	MM	MM	MM	MM	MM	MM	MM	MM	MM	MM	MM	MM	MM	MM	MM	MM
FtcF2_2_34	FF	FF	FF	FF	FF	FF	FF	FF	FF	FF	FF	FF	FF	FF	FF	FF	FF	FF	FF	FF	FF	FF	FF	FF	FF	FF	FF	FF	FF	FF	FF	FF	FF	FF	FF	FF	FF	FF	FF	FF	FF	FF	FF	FF	FF	FF	FF	FF	FF
FtcF2_2_35	FF	FF	FF	FF	FF	FF	FF	FF	FF	FF	MF	MF	MF	MF	MF	MF	MF	MM	MM	MM	MM	MM	MM	MM	MM	MM	MM	MM	MM	MM	MM	MM	MM	MM	MM	MM	MM	MM	MM	MM	MM	MM	MM	MM	MM	MM	MM	MM	MM
FtcF2_2_36	MF	MF	MF	MF	MF	MF	MF	MF	MF	MF	MF	MF	MF	MF	MF	MF	MF	MF	MF	MF	MF	MF	MF	MF	MF	MF	MF	MF	MF	MF	MF	MF	MF	MF	MF	MF	MF	MF	MF	MF	MF	MF	MF	MF	MF	MF	MF	MF	MF
FtcF2_2_37	MF	MF	MF	MF	MF	MF	MF	MF	MF	MF	FF	FF	FF	FF	FF	FF	FF	FF	FF	FF	FF	FF	FF	FF	FF	FF	FF	FF	FF	FF	FF	FF	FF	FF	FF	FF	FF	FF	FF	FF	FF	FF	FF	FF	FF	FF	FF	FF	FF
FtcF2_2_38	MM	MM	MM	MM	MM	MM	MM	MM	MM	MM	MM	MM	MM	MF	MF	MF	MF	MF	MF	MF	MF	MF	MF	MF	MF	MF	MF	MF	MF	MF	MF	MF	MF	MF	MF	MF	MF	MF	MF	MF	MF	MF	MF	MF	MF	MF	MF	MF	MF
FtcF2_2_39	MM	MM	MM	MM	MM	MM	MM	MM	MM	MM	MM	MM	MM	MM	MM	MF	MF	MF	MF	MF	MF	MF	MF	MF	MF	MF	MF	MF	MF	MF	MF	MF	MF	MF	MF	MF	MF	MF	MF	MF	MF	MF	MF	MF	MF	MF	MF	MF	MF
FtcF2_2_40	MM	MM	MM	MM	MM	MM	MM	MM	MM	MM	MM	MM	MM	MM	MM	MM	MM	MM	MM	MM	MM	MM	MM	MM	MM	MM	MM	MM	MM	MM	MM	MM	MM	MM	MM	MM	MM	MM	MM	MM	MM	MM	MM	MM	MM	MM	MM	MM	MM
FtcF2_2_41	FF	FF	FF	FF	FF	FF	FF	FF	FF	FF	FF	FF	FF	MF	MF	MF	MF	MF	MF	MF	MF	MF	MF	MF	MF	MF	MF	MF	MF	MF	MF	MF	MF	MF	MF	MF	MF	MF	MF	MF	MF	MF	MF	MF	MF	MF	MF	MF	MF
FtcF2_2_42	MF	MF	MF	FF	FF	FF	FF	FF	FF	FF	FF	FF	FF	FF	FF	FF	FF	FF	FF	FF	FF	FF	FF	FF	FF	FF	FF	FF	FF	FF	FF	FF	FF	FF	FF	FF	FF	FF	FF	FF	FF	FF	FF	FF	FF	FF	FF	FF	FF
FtcF2_2_43	FF	FF	FF	FF	FF	FF	FF	FF	FF	FF	FF	FF	FF	FF	FF	FF	FF	FF	FF	FF	FF	FF	FF	FF	FF	FF	FF	FF	FF	FF	FF	FF	FF	FF	FF	FF	FF	FF	FF	FF	FF	FF	FF	FF	FF	FF	FF	FF	FF
FtcF2_2_44	MF	MF	MF	MF	MF	MF	MF	MF	MF	MF	MF	MF	FF	FF	FF	FF	FF	FF	FF	FF	FF	FF	FF	FF	FF	FF	FF	FF	FF	FF	FF	FF	FF	FF	FF	FF	FF	FF	FF	FF	FF	FF	FF	FF	FF	FF	FF	FF	FF
FtcF2_2_45	MF	MF	MF	MF	MF	MF	MF	MF	MF	MF	MM	MM	MM	MM	MM	MM	MM	MM	MM	MM	MM	MM	MM	MM	MM	MM	MM	MM	MM	MM	MM	MM	MM	MM	MM	MM	MM	MM	MM	MM	MM	MM	MM	MM	MM	MM	MM	MM	MM
FtcF2_2_46	MF	MF	MF	MF	MF	MF	MM	MM	MM	MM	MM	MM	MM	MM	MM	MM	MM	MM	MM	MM	MM	MM	MM	MM	MM	MM	MM	MM	MM	MM	MM	MM	MM	MM	MM	MM	MM	MM	MM	MM	MM	MM	MM	MM	MM	MM	MM	MM	MM
FtcF2_2_47	MF	MF	MF	MF	MF	MF	MF	MF	MF	MF	MF	MF	MF	MF	MF	MF	MF	MF	MF	MF	MF	MF	MF	MF	MF	MF	MF	MF	MF	MF	MF	MF	MF	MF	MF	MF	MF	MF	MF	MF	MF	MF	MF	MF	MF	MF	MF	MF	MF
FtcF2_2_48	MF	MF	MF	MM	MF	MF	MF	MF	MF	MF	MF	MF	MF	MF	MF	MF	MF	MF	MF	MF	MF	MF	MF	MF	MF	MF	MF	MF	MF	FF	MF	FF	MF	MF	MF	MF	MF	MF	MF	MF	MF	MF	MF	MF	MF	MF	MF	MF	MF
FtcF2_2_49	MM	MM	MM	MM	MM	MM	MM	MM	MM	MM	MM	MM	MM	MM	MM	MM	MM	MM	MM	MM	MM	MM	MM	MM	MM	MM	MM	MM	MM	MM	MM	MM	MM	MM	MM	MM	MM	MM	MM	MM	MM	MM	MM	MM	MM	MM	MM	MM	MM
FtcF2_2_50	MM	MM	MM	MM	MM	MM	MM	MM	MM	MM	MM	MM	MM	MM	MM	MM	MM	MM	MM	MM	MM	MM	MM	MM	MM	MM	MM	MM	MM	MF	MF	MF	MF	MF	MF	MF	MF	MF	MF	MF	MF	MF	MF	MF	MF	MF	MF	MF	MF
FtcF2_2_51	MF	MF	MF	MF	MF	MF	MF	MF	MF	MM	MM	MM	MM	MF	MF	MF	MF	MF	MF	MF	MF	MF	MF	MF	MF	MF	MF	MF	MF	MF	MF	MF	MF	MF	MF	MF	MF	MF	MF	MF	MF	MF	MF	MF	MF	MF	MF	MF	MF
FtcF2_2_52	MF	MF	MF	MF	MF	MF	MF	MF	MF	MF	MF	MM	MM	MM	MM	MM	MM	MM	MM	MM	MM	MM	MM	MM	MM	MM	MM	MM	MM	MM	MM	MM	MM	MM	MM	MM	MM	MM	MM	MM	MM	MM	MM	MM	MM	MM	MM	MM	MM
FtcF2_2_53	FF	FF	FF	FF	FF	FF	FF	FF	FF	FF	FF	FF	MF	MF	MF	MF	MF	MF	MF	MF	MF	MF	MF	MF	MF	MF	MF	MF	MF	MF	MF	MF	MF	MF	MF	MF	MF	MF	MF	MF	MF	MF	MF	MF	MF	MF	MF	MF	MF
FtcF2_2_54	MF	MF	MF	MF	MF	MF	MF	MF	MF	MF	FF	MF	MF	MF	MF	MF	MF	MF	MF	MF	MF	MF	MF	MF	MF	MF	MF	MF	MF	MF	MF	MF	MF	MF	MF	MF	MF	MF	MF	MF	MF	MF	MF	MF	MF	MF	MF	MF	MF
FtcF2_2_55	MF	MF	MF	MF	MF	MF	MF	MF	MF	MF	MF	MF	MF	MF	MF	MF	MF	MF	MF	MF	MF	MF	MF	MF	MF	MF	MF	MF	MF	MF	MF	MF	MF	MF	MF	MF	MF	MF	MF	MF	MF	MF	MF	MF	MF	MF	MF	MF	MF
FtcF2_2_56	MF	MF	MF	MF	MF	MF	MF	MF	MF	MF	MF	MF	MF	MF	MF	MF	MF	MF	MF	MF	MF	MF	MF	MF	MF	MF	MF	MF	MF	MF	MF	MF	MF	MF	MF	MF	MF	MF	MF	MF	MF	MF	MF	MF	MF	MF	MF	MF	MF
FtcF2_2_57	MF	MF	MF	MF	MF	MF	MM	MM	MM	MM	MM	MM	MM	MM	MM	MM	MM	MM	MM	MM	MM	MM	MM	MM	MM	MM	MM	MM	MM	MM	MM	MM	MM	MM	MM	MM	MM	MM	MM	MM	MM	MM	MM	MM	MM	MM	MM	MM	MM
FtcF2_2_58	MM	MM	MM	MM	MM	MM	MM	MM	MM	MM	MF	MF	MF	MF	MF	MF	MF	MF	MF	MF	MF	MF	MF	MF	MF	MF	MF	MF	MF	MF	MF	MF	MF	MF	MF	MF	MF	MF	MF	MF	MF	MF	MF	MF	MF	MF	MF	MF	MF
FtcF2_2_59	MF	MF	MF	MF	MF	MF	FF	FF	FF	FF	FF	FF	FF	FF	FF	FF	FF	FF	FF	FF	FF	FF	FF	FF	FF	FF	FF	FF	FF	FF	FF	FF	FF	FF	FF	FF	FF	FF	FF	FF	FF	FF	FF	FF	FF	FF	FF	FF	FF
FtcF2_2_60	MF	MF	MF	MF	MM	MM	MM	MM	MM	MM	MF	MF	MF	MF	MF	MF	MF	MF	MF	MF	MF	MF	MF	MF	MF	MF	MF	MF	MF	FF	FF	FF	FF	FF	FF	FF	FF	FF	FF	FF	FF	FF	FF	FF	FF	FF	FF	FF	MF
FtcF2_2_61	MM	MM	MM	MM	MM	MM	MF	MF	MF	MF	MF	MF	MF	MF	MF	MF	MF	MF	MF	MF	MF	MF	MF	MF	MF	MF	MF	MF	MF	MF	MF	MF	MF	MF	MF	MF	MF	MF	MF	MF	MF	MF	MF	MF	MF	MF	MF	MF	MF
FtcF2_2_62	FF	FF	FF	FF	MF	MF	MF	MM	MM	MM	MM	MM	MM	MM	MM	MM	MM	MM	MM	MM	MM	MM	MM	MM	MM	MM	MM	MM	MM	MM	MM	MM	MM	MM	MM	MM	MM	MM	MM	MM	MM	MM	MM	MM	MM	MM	MM	MM	MM
FtcF2_2_63	FF	FF	FF	FF	FF	FF	FF	FF	FF	FF	MF	MM	MM	MM	MM	MM	MM	MM	MM	MM	MM	MM	MM	MM	MM	MM	MM	MM	MM	MF	MM	MF	MM	MM	MM	MM	MM	MM	MM	MM	MM	MM	MM	MM	MM	MM	MM	MM	MM
FtcF2_2_64	MM	MM	MM	MM	MF	MF	MF	MF	MF	MF	MF	FF	FF	FF	FF	FF	FF	FF	FF	FF	FF	FF	FF	FF	FF	FF	FF	FF	FF	FF	FF	FF	FF	FF	FF	FF	FF	FF	FF	FF	FF	FF	FF	FF	FF	FF	FF	FF	FF
FtcF2_2_65	MF	MF	MF	MF	MF	MF	MF	MF	MF	MF	MF	MF	MF	MF	MF	MF	MF	MF	MF	MF	MF	MF	MF	MF	MF	MF	MF	MF	MF	MF	MF	MF	MF	MF	MF	MF	MF	MF	MF	MF	MF	MF	MF	MF	MF	MF	MF	MF	MF
FtcF2_2_66	MM	MM	MM	MM	MM	MM	MM	MM	MM	MM	MM	MM	MM	MM	MM	MM	MM	MM	MM	MF	MF	MF	MF	MF	MF	MF	MF	MF	MF	MF	MF	MF	MF	MF	MF	MF	MF	MF	MF	MF	MF	MF	MF	MF	MF	MF	MF	MF	MF
FtcF2_2_67	FF	FF	FF	FF	FF	FF	FF	FF	FF	FF	FF	FF	FF	FF	FF	FF	FF	FF	FF	FF	FF	FF	FF	FF	FF	FF	FF	FF	FF	FF	FF	FF	FF	FF	FF	FF	FF	FF	FF	FF	FF	FF	FF	FF	FF	FF	FF	FF	FF
FtcF2_2_68	MF	MF	MF	MF	MF	MF	MF	MM	MM	MM	MF	MF	MF	MF	MF	MF	MF	MF	MF	MF	MF	MF	MF	MF	MF	MF	MF	MF	MF	MF	MF	MF	MF	MF	MF	MF	MF	MF	MF	MF	MF	MF	MF	MF	MF	MF	MF	MF	MF
FtcF2_2_69	MF	MF	MF	MF	MF	MF	MF	MF	MF	MF	FF	FF	FF	FF	FF	FF	FF	FF	FF	FF	FF	FF	FF	FF	FF	FF	FF	FF	FF	MF	FF	MF	MF	FF	MF	MF	MF	MF	MF	MF	MF	MF	MF	MF	MF	MF	MF	FF	FF
FtcF2_2_70	FF	FF	FF	FF	FF	FF	FF	FF	FF	FF	FF	FF	FF	FF	MF	MF	MF	MF	MF	MF	MF	MF	MF	MF	MF	MF	MF	MF	MF	MF	MF	MF	MF	MF	MF	MF	MF	MF	MF	MF	MF	MF	MF	MF	MF	MF	MF	MF	MF
FtcF2_2_71	MF	MF	MF	MF	MF	MF	MF	MF	MF	MF	MF	MF	MF	MF	MF	MF	MF	MF	MF	MF	MF	MF	MF	MF	MF	MF	MF	MF	MF	MF	MF	MF	MF	MF	MF	MF	MF	MF	MF	MF	MF	MF	MF	MF	MF	MF	MF	MF	MF
FtcF2_2_72	FF	FF	FF	FF	FF	FF	FF	FF	FF	FF	FF	FF	MF	MF	MF	MF	MF	MF	MF	MF	MF	MF	MF	MF	MF	MF	MF	MF	MF	MF	MF	MF	MF	MF	MF	MF	MF	MF	MF	MF	MF	MF	MF	MF	MF	MF	MF	MF	MF
FtcF2_2_73	MM	MM	MM	MM	MM	MM	MM	MM	MM	MM	MM	MM	MM	MM	MM	MM	MM	MM	MM	MM	MM	MM	MM	MM	MM	MM	MM	MM	MM	MM	MM	MM	MM	MM	MM	MM	MM	MM	MM	MM	MM	MM	MM	MM	MM	MM	MM	MM	MM
FtcF2_3_1	MF	MF	MF	MF	MF	MF	MF	MF	MF	MF	MF	MF	MF	MF	FF	FF	FF	FF	FF	FF	FF	FF	FF	FF	FF	FF	FF	FF	FF	FF	FF	FF	FF	FF	FF	FF	FF	FF	FF	FF	FF	FF	FF	FF	FF	FF	FF	FF	FF
FtcF2_3_2	MF	MF	MF	MF	MF	MF	MF	MF	MF	MF	MF	MF	MF	MF	MF	MF	MF	MF	MF	FF	FF	FF	FF	FF	FF	FF	FF	FF	FF	FF	FF	FF	FF	FF	FF	FF	FF	FF	FF	FF	FF	FF	FF	FF	FF	FF	FF	FF	FF
FtcF2_3_3	FF	FF	FF	FF	FF	FF	FF	FF	FF	FF	FF	FF	FF	FF	FF	FF	FF	FF	FF	FF	FF	FF	FF	FF	FF	FF	FF	FF	FF	FF	FF	FF	FF	FF	FF	FF	FF	FF	FF	FF	FF	FF	FF	FF	FF	FF	FF	FF	FF
FtcF2_3_4	MF	MF	MF	MF	MF	MF	MF	MF	MF	MF	MF	MF	MF	MF	MF	MF	MF	MF	MM	MM	MM	MM	MM	MM	MM	MM	MM	MM	MM	MM	MM	MM	MM	MM	MM	MM	MM	MM	MM	MM	MM	MM	MM	MM	MM	MM	MM	MM	MM
FtcF2_3_5	FF	FF	FF	FF	FF	FF	FF	FF	FF	FF	FF	FF	FF	FF	FF	FF	FF	FF	FF	FF	FF	FF	FF	FF	FF	FF	FF	FF	FF	FF	FF	FF	FF	FF	FF	FF	FF	FF	FF	FF	FF	FF	FF	FF	FF	FF	FF	FF	FF
FtcF2_3_6	FF	FF	FF	FF	FF	FF	FF	FF	FF	FF	FF	FF	FF	FF	FF	FF	FF	FF	FF	FF	FF	FF	FF	FF	FF	FF	FF	FF	FF	FF	FF	FF	FF	FF	FF	FF	FF	FF	FF	FF	FF	FF	FF	FF	FF	FF	FF	FF	FF
FtcF2_3_7	FF	FF	FF	FF	FF	FF	FF	FF	FF	FF	FF	FF	FF	FF	FF	FF	FF	FF	FF	FF	FF	FF	FF	FF	FF	FF	FF	FF	FF	FF	FF	FF	FF	FF	FF	FF	FF	FF	FF	FF	FF	FF	FF	FF	FF	FF	FF	FF	FF
FtcF2_3_8	MF	MF	MF	MF	MF	MF	notMM	MF	notMM	MF	MF	MF	MF	MF	MF	MF	MF	MF	MF	MF	MF	MF	MF	MF	MF	MF	MF	MF	MF	MF	MF	MF	MF	MF	MF	MF	MF	MF	MF	MF	MF	MF	MF	MF	MF	MF	MF	MF	MF
FtcF2_3_9	FF	FF	FF	FF	FF	FF	FF	FF	FF	FF	FF	FF	FF	FF	MF	MF	MF	MF	MF	MF	MF	MF	MF	MF	MF	MF	MF	MF	MF	MF	MF	MF	MF	MF	MF	MF	MF	MF	MF	MF	MF	MF	MF	MF	MF	MF	MF	MF	MF
FtcF2_3_10	FF	FF	FF	FF	FF	FF	FF	FF	FF	FF	FF	MF	MF	MF	MF	MF	MF	MF	MF	MF	MF	MF	MF	MF	MF	MF	MF	MF	MF	MF	MF	MF	MF	MF	MF	MF	MF	MF	MF	MF	MF	MF	MF	MF	MF	MF	MF	MF	MF
FtcF2_3_11	MM	MM	MM	MM	MM	MM	MM	MM	MM	MM	MM	MM	MM	MM	MM	MM	MM	notFF	MF	MF	MF	MF	MF	MF	MF	MF	MF	MF	MF	MF	MF	MF	MF	MF	MF	MF	MF	MF	MF	MF	MF	MF	MF	MF	MF	MF	MF	MF	MF
FtcF2_3_12	MM	MM	MM	MM	MM	MM	MM	MM	MM	MM	MM	MM	MM	MM	MM	MM	MM	MM	MM	MM	MM	MM	MM	MM	MM	MM	MM	MM	MM	MM	MM	MM	MM	MM	MM	MM	MM	MM	MM	MM	MM	MM	MM	MM	MM	MM	MM	MM	MM
FtcF2_3_13	MF	MF	MF	MF	FF	FF	FF	FF	FF	FF	FF	FF	FF	FF	FF	FF	FF	FF	FF	FF	FF	FF	FF	FF	FF	FF	FF	FF	FF	FF	FF	FF	FF	FF	FF	FF	FF	FF	FF	FF	FF	FF	FF	FF	FF	FF	FF	FF	FF
FtcF2_3_14	FF	FF	FF	FF	MF	MF	MF	MF	MF	MF	MF	MF	MF	MF	MF	MF	MF	MF	MF	MF	MF	MF	MF	MF	MF	MF	MF	MF	MF	MF	MF	MF	MF	MF	MF	MF	MF	MF	MF	MF	MF	MF	MF	MF	MF	MF	MF	MF	MF
FtcF2_3_15	MF	MF	MF	MF	MF	MF	MF	MF	MF	MF	MF	MF	MF	MF	FF	FF	FF	FF	FF	FF	FF	FF	FF	FF	FF	FF	FF	FF	FF	FF	FF	FF	FF	FF	FF	FF	FF	FF	FF	FF	FF	FF	FF	FF	FF	FF	FF	FF	FF
FtcF2_3_16	MF	MF	MF	MF	MF	MF	MF	MF	MF	MF	MF	MF	MF	MF	MF	MF	MF	MF	MF	MF	MF	MF	MF	MF	MF	MF	MF	MF	MF	MF	MF	MF	MF	MF	MF	MF	MF	MF	MF	MF	MF	MF	MF	MF	MF	MF	MF	MF	MF
FtcF2_3_17	MF	MF	MF	MF	MF	MF	MF	MF	MF	MF	MF	MF	MF	MF	MF	MF	MF	MF	MF	MF	MF	MF	MF	MF	MF	MF	MF	MF	MF	MF	MF	MF	MF	MF	MF	MF	MF	MF	MF	MF	MF	MF	MF	MF	MF	MF	MF	MF	MF
FtcF2_3_18	MM	MM	MM	MM	MM	MM	MM	MM	MM	MM	MM	MM	MM	MM	MM	MM	MM	MM	MM	MM	MM	MM	MM	MM	MM	MM	MM	MM	MM	MM	MM	MM	MM	MM	MM	MM	MM	MM	MM	MM	MM	MM	MM	MM	MM	MM	MM	MM	MM
FtcF2_3_19	MF	MF	MF	MF	MF	MF	MF	MF	MF	MF	MF	MF	MF	MF	MF	MF	MF	MF	MF	MF	MF	MF	MF	MF	MF	MF	MF	MF	MF	MF	MF	MF	MF	MF	MF	MF	MF	MF	MF	MF	MF	MF	MF	MF	MF	MF	MF	MF	MF
FtcF2_3_20	FF	FF	FF	FF	FF	FF	FF	FF	FF	FF	MF	MF	MF	MF	MF	MF	MF	MF	MF	MF	MF	MF	MF	MF	MF	MF	MF	MF	MF	MF	MF	MF	MF	MF	MF	MF	MF	MF	MF	MF	MF	MF	MF	MF	MF	MF	MF	MF	MF
FtcF2_3_21	MF	MF	MF	MF	MF	MF	MF	MF	MF	MF	MF	MF	MF	MF	FF	FF	FF	FF	FF	FF	FF	FF	FF	FF	FF	FF	FF	FF	FF	FF	FF	FF	FF	FF	FF	FF	FF	FF	FF	FF	FF	FF	FF	FF	FF	FF	FF	FF	FF
FtcF2_3_22	MF	MF	MF	FF	FF	FF	FF	FF	FF	FF	FF	FF	FF	FF	FF	FF	FF	FF	MF	MF	MF	MF	MF	MF	MF	MF	MF	MF	MF	MF	MF	MF	MF	MF	MF	MF	MF	MF	MF	MF	MF	MF	MF	MF	MF	MF	MF	MF	MF
FtcF2_3_23	MF	MF	MF	MF	MF	MF	MF	MF	MF	FF	FF	FF	FF	FF	FF	FF	FF	FF	FF	FF	FF	FF	FF	FF	FF	FF	FF	FF	FF	FF	FF	FF	FF	FF	FF	FF	FF	FF	FF	FF	FF	FF	FF	FF	FF	FF	FF	FF	FF
FtcF2_3_24	MF	MF	MF	MF	MF	MF	MF	MF	MF	MF	MF	MF	MM	MM	MM	MM	MM	MM	MM	MM	MM	MM	MM	MM	MM	MM	MM	MM	MM	MM	MM	MM	MM	MM	MM	MM	MM	MM	MM	MM	MM	MM	MM	MM	MM	MM	MM	MM	MM
FtcF2_3_25	MF	MF	MF	MF	MF	MF	MF	MF	MF	MF	MF	MF	MF	MF	MF	MM	MM	MM	MM	MM	MM	MM	MM	MM	MM	MM	MM	MM	MM	MM	MM	MM	MM	MM	MM	MM	MM	MM	MM	MM	MM	MM	MM	MM	MM	MM	MM	MM	MM
FtcF2_3_26	FF	FF	FF	FF	FF	FF	MM	MM	MM	MM	MM	MM	MM	MM	MM	MM	MM	MM	MM	MM	MM	MM	MM	MM	MM	MM	MM	MM	MM	MM	MM	MM	MM	MM	MM	MM	MM	MM	MM	MM	MM	MM	MM	MM	MM	MM	MM	MM	MM
FtcF2_3_27	notMM	notMM	notMM	FF	notMM	FF	notMM	notMM	notMM	notMM	FF	FF	FF	FF	FF	FF	FF	FF	FF	FF	FF	FF	FF	FF	FF	FF	FF	FF	FF	FF	FF	FF	notMM	FF	FF	FF	FF	FF	FF	FF	FF	FF	FF	FF	FF	FF	FF	FF	FF
FtcF2_3_28	MF	MF	MF	MF	MF	MM	MM	MM	MM	MM	MM	MM	MM	MM	MM	MM	MM	MM	MM	MM	MM	MM	MM	MM	MM	MM	MM	MM	MM	MM	MM	MM	MM	MM	MM	MM	MM	MM	MM	MM	MM	MM	MM	MM	MM	MM	MM	MM	MM
FtcF2_3_29	MM	MM	MM	MM	MM	MM	MM	MM	MM	MM	MF	MF	MF	MF	MF	MF	MF	MF	MF	MF	MF	MF	MF	MF	MF	MF	MF	MF	MF	FF	MF	MF	MF	MF	MF	MF	MF	MF	MF	MF	MF	MF	MF	MF	MF	MF	MF	MF	MF
FtcF2_3_31	FF	MF	MF	MF	MF	MF	MF	MF	MF	MF	MF	MF	MF	MF	MF	MF	MF	MF	MF	MF	MF	MF	MF	MF	MF	MF	MF	MM	MM	MM	MM	MM	MM	MM	MM	MM	MM	MM	MM	MM	MM	MM	MM	MM	MM	MM	MM	MM	MM
FtcF2_3_32	MM	MM	MM	MM	MM	MM	MM	MM	notFF	MM	MF	MF	MF	MF	FF	FF	FF	notMM	FF	FF	FF	FF	FF	FF	FF	FF	FF	FF	FF	FF	FF	FF	FF	FF	FF	FF	FF	FF	FF	FF	FF	FF	FF	FF	FF	FF	FF	FF	FF
FtcF2_3_33	MF	MF	MF	FF	FF	FF	notMM	notMM	FF	notMM	FF	FF	FF	FF	FF	FF	FF	notMM	notMM	FF	FF	FF	FF	FF	FF	FF	FF	FF	FF	FF	FF	FF	notMM	FF	FF	FF	FF	FF	FF	FF	FF	FF	FF	FF	FF	FF	FF	FF	FF
FtcF2_3_34	MF	notFF	MF	MF	MF	MF	notMM	MF	MF	notMM	FF	FF	FF	FF	FF	FF	FF	FF	FF	FF	FF	FF	FF	FF	FF	FF	FF	FF	FF	FF	FF	FF	notMM	FF	FF	FF	FF	FF	FF	FF	FF	FF	FF	FF	FF	FF	FF	FF	FF
FtcF2_3_35	MF	MF	MF	MF	MF	MF	notMM	MF	MF	MF	MF	MF	MF	MF	MF	MF	MF	MF	MF	MF	MF	MF	MF	MF	MF	MF	MF	MF	MF	MF	MF	MF	MF	MF	MF	MF	MF	MF	MF	MF	MF	MF	MF	MF	MF	MF	MF	MF	MF
FtcF2_3_36	MF	MF	MF	MF	MF	MF	MF	MF	MF	MF	MF	MF	MF	FF	FF	FF	FF	FF	FF	FF	FF	FF	FF	FF	FF	FF	FF	FF	FF	FF	FF	FF	FF	FF	FF	FF	FF	FF	FF	FF	FF	FF	FF	FF	FF	FF	FF	FF	FF
FtcF2_3_37	notMM	notMM	notMM	FF	FF	notMM	notMM	notMM	notFF	notFF	MF	MF	MF	MF	MF	MF	MF	NA	MF	MF	MF	MF	MF	MF	MF	MF	MF	MF	MF	MF	MF	MF	notFF	MF	MF	MF	MF	MF	MF	MF	MF	MF	MF	MF	MF	notMM	MF	MF	MF
FtcF2_3_38	FF	FF	FF	FF	FF	FF	notMM	FF	FF	notMM	FF	MF	MM	MM	MM	MM	MM	MM	MM	MM	MM	MM	MM	MM	MM	MM	MM	MM	MM	MM	MM	MM	MM	MM	MM	MM	MM	MM	MM	MM	MM	MM	MM	MM	MM	MM	MM	MM	MM
FtcF2_3_39	FF	FF	MF	MF	MF	MM	MM	MM	MM	notFF	MM	MM	MM	MM	MM	MM	MM	MM	MM	MM	MM	MM	MM	MM	MM	MM	MM	MM	MF	MF	MF	MF	notMM	MF	MF	MF	MF	MF	MF	MF	MF	MF	MF	MF	MF	MF	MF	MF	MF
FtcF2_3_40	MM	MM	MM	MM	MM	MM	MM	MM	MM	notFF	MM	MM	MM	MM	MM	MM	MF	MF	MF	MF	MF	MF	MF	MF	MF	MF	MF	MF	MF	MF	MF	MF	MF	MF	MF	MF	MF	MF	MF	MF	MF	MF	MF	MF	MF	MF	MF	MF	MF
FtcF2_3_41	MF	MF	MF	MF	MF	MF	notMM	MF	MF	MF	MF	MF	MF	MM	MM	MM	MM	MM	MM	MM	MF	MF	MF	MF	MF	MF	MF	MF	MF	MF	MF	MF	MF	MF	MF	MF	MF	MF	MF	MF	MF	MF	MF	MF	MF	MF	MF	MF	MF
FtcF2_3_42	notFF	notFF	notFF	MM	notFF	MM	notFF	notFF	notFF	notFF	MM	MM	MM	MM	MM	MM	MM	notFF	notFF	MM	MM	MM	MM	MM	MM	MM	MM	MM	MM	MF	MM	MF	notFF	MM	MM	MM	MM	MM	MF	MF	MF	MF	MF	MF	MM	notFF	MF	MM	MM
FtcF2_3_44	FF	FF	notMM	FF	MF	MF	MF	MF	notMM	MF	MF	MF	MF	MF	MF	MF	MF	MF	MF	MF	MF	MF	MF	MF	MF	MF	MF	MF	MF	MF	MF	MF	MF	MF	MF	MF	MF	MF	MF	MF	MF	MF	MF	MF	MF	MF	MF	MF	MF
FtcF2_3_45	MF	notMM	notMM	MF	MF	notFF	MF	notFF	MF	notFF	MF	MF	MM	notFF	MM	MM	MM	notFF	notFF	MM	MM	MM	MM	MM	MM	MM	MM	MM	MM	MM	MM	MM	notFF	MM	MM	MM	MM	MM	MM	MM	MM	MM	MM	MM	MM	MM	MM	MM	MM
FtcF2_3_46	MM	MM	notFF	MM	MM	MM	MM	MM	MM	notFF	MM	MM	MM	MM	MM	MM	MM	MM	MM	MM	MM	MM	MM	MM	MM	MM	MM	MM	MM	MM	MM	MM	MM	MM	MM	MM	MM	MM	MM	MM	MM	MM	MM	MM	MM	MM	MM	MM	MM
FtcF2_3_47	MM	notFF	MM	MM	MM	MM	notFF	MM	MM	MM	MM	MM	MM	MM	MM	MM	MM	MM	MF	MF	MF	MF	MF	MF	MF	MF	MF	MF	MF	MF	MF	MF	MF	MF	MF	MF	MF	MF	MF	MF	MF	MF	MF	MF	MF	MF	MF	MF	MF
FtcF2_3_48	MF	MF	MF	MF	MF	MF	notMM	notMM	MF	MF	MF	MF	MF	MF	MF	MF	MF	MF	FF	FF	FF	FF	FF	FF	FF	FF	FF	FF	FF	FF	FF	FF	notMM	FF	FF	FF	FF	FF	FF	FF	FF	FF	FF	FF	FF	FF	FF	FF	FF
FtcF2_3_49	MF	MF	MF	MF	MF	MF	MM	MM	MM	notFF	MM	MM	MM	MM	MM	MM	MM	MM	MM	MM	MM	MM	MM	MM	MM	MM	MM	MM	MM	MM	MM	MM	notFF	MM	MM	MM	MM	MM	MM	MM	MM	MM	MM	MM	MM	MM	MM	MM	MM
FtcF2_3_50	notMM	MF	MF	MF	MF	MF	notMM	MF	MF	notMM	MF	MF	MF	MF	MF	MF	MF	MF	MF	MF	MF	MF	MF	MF	MF	MF	MF	MF	MF	MF	MF	MF	MF	MF	MF	MF	MF	MF	MF	MF	MF	MF	MF	MF	MF	MF	MF	MF	MF
FtcF2_3_51	notFF	NA	notFF	notFF	NA	notFF	NA	NA	NA	notFF	MM	notFF	MM	notFF	notFF	notFF	notFF	NA	notMM	MF	MF	MF	MF	notFF	MF	MF	MF	MF	MF	FF	MF	notFF	notMM	MF	MF	MF	MF	MF	notFF	MF	notMM	notFF	MF	MF	MF	notFF	notMM	notMM	MF
FtcF2_3_52	notFF	notFF	MF	notFF	MF	MF	notMM	MF	MF	notFF	MF	MF	MF	MF	MF	notMM	notMM	MF	notFF	MF	MF	MF	MF	MF	MF	MF	MF	MF	MF	MF	MF	MF	NA	MF	MF	MF	MF	MF	MF	MF	notMM	MF	MF	MF	MF	MF	MF	MF	MF
FtcF2_3_53	MF	MF	MF	MF	notFF	FF	notMM	MF	MF	notMM	MF	MF	MF	MF	MF	MF	MF	notMM	FF	FF	FF	FF	FF	FF	FF	FF	FF	FF	FF	FF	FF	FF	notMM	FF	FF	FF	FF	FF	FF	FF	FF	FF	FF	FF	FF	FF	FF	FF	FF
FtcF2_3_54	MM	MM	MM	MM	MM	MM	MM	MM	MM	notFF	MM	MM	MM	MM	MM	MM	MM	MM	MM	MM	MM	MM	MM	MM	MM	MM	MM	MM	MM	MM	MM	MM	MM	MM	MM	MM	MM	MM	MM	MM	MM	MM	MM	MM	MM	MM	MM	MM	MM
FtcF2_3_55	NA	notMM	notMM	FF	notMM	FF	notMM	notMM	notMM	notMM	FF	FF	FF	FF	notMM	FF	FF	notMM	notMM	FF	FF	FF	FF	FF	FF	FF	FF	FF	FF	FF	FF	FF	notMM	FF	FF	FF	FF	FF	FF	FF	FF	FF	FF	FF	FF	notMM	FF	FF	FF
FtcF2_3_57	MF	MF	notMM	notMM	MF	MF	MF	notMM	NA	notMM	FF	FF	FF	notMM	FF	FF	FF	notMM	FF	MF	MF	MF	MF	MF	MF	MF	MF	MF	MF	FF	MF	MF	MF	MF	MF	MF	MF	MF	MF	MF	MF	MF	MF	MF	MF	MF	MF	MF	MF
FtcF2_3_60	MM	MM	MM	MM	MM	MM	notFF	MM	notFF	MM	MM	MM	MM	MM	MM	MF	MF	MF	MF	MF	MF	MF	MF	MF	MF	MF	MF	MF	MF	MF	MF	MF	MF	MF	MF	MF	MF	MF	MF	MF	MF	MF	MF	MF	MF	MF	MF	MF	MF
FtcF2_3_61	MF	MF	MF	MF	MF	MF	MF	notFF	notMM	MF	MF	MF	MF	MF	MF	MF	MF	MF	MF	MF	MF	MF	MF	MF	MF	MF	MF	MF	MF	MF	MF	MF	MF	MF	MF	MF	MF	MF	MF	MF	MF	MF	MF	MF	MF	MF	MF	MF	MF
FtcF2_3_62	FF	FF	FF	FF	FF	FF	FF	FF	FF	notMM	FF	FF	FF	FF	FF	FF	FF	FF	FF	FF	FF	FF	FF	FF	FF	FF	FF	FF	FF	FF	FF	FF	FF	FF	FF	FF	FF	FF	FF	FF	FF	FF	FF	FF	FF	FF	FF	FF	FF
FtcF2_3_63	MF	MF	MF	MF	MF	MF	MF	MF	notMM	MF	MF	MF	MF	MF	MF	MF	MF	MF	MF	MF	MF	MF	MF	MF	MF	MF	MF	MF	MF	MF	MF	MF	MF	MF	MF	MF	MF	MF	MF	MF	MF	MF	MF	MF	MF	MF	MF	MF	MF
FtcF2_3_64	FF	FF	FF	FF	FF	FF	FF	FF	FF	FF	FF	MF	MF	MF	MF	MF	MF	MF	MF	MF	MF	MF	MF	MF	MF	MF	MF	MF	MF	FF	MF	FF	MF	MF	MF	MF	MF	MF	MF	MF	MF	MF	MF	MF	MF	MF	MF	MF	MF
FtcF2_3_65	notMM	FF	notMM	FF	MF	MF	notFF	notFF	MF	MF	MF	MF	MF	MF	MF	MF	MF	MF	notMM	MF	MF	MF	MF	MF	MF	MF	MF	MF	MF	MF	MF	MF	MF	MF	MF	MF	MF	MF	MF	MF	MF	MF	MF	MF	MF	MF	MF	MF	MF
FtcF2_3_66	FF	notMM	notMM	FF	FF	FF	notMM	notMM	NA	notMM	FF	FF	FF	FF	FF	MF	MF	notMM	notFF	MF	MF	MF	MF	MF	MF	MF	MF	MF	MF	MF	MF	MF	MF	MF	MF	MF	MF	MF	MF	MF	MF	MF	MF	MF	MF	notFF	MF	MF	MF
FtcF2_3_67	FF	FF	FF	FF	FF	FF	NA	notMM	notMM	notMM	FF	FF	FF	notMM	FF	FF	FF	notMM	FF	FF	MF	MF	MF	MF	MF	MF	MF	MF	MF	MF	MF	MF	notMM	MF	MF	MF	MF	MF	MF	MF	MF	MF	MF	MF	MF	MF	MF	MF	MF
FtcF2_3_68	FF	NA	NA	notMM	notMM	notMM	notMM	notMM	NA	NA	FF	notMM	FF	FF	notMM	notMM	FF	notMM	FF	FF	FF	FF	FF	FF	FF	FF	FF	FF	FF	FF	FF	FF	notMM	FF	FF	FF	FF	FF	notMM	FF	notMM	FF	notMM	notMM	FF	notMM	notMM	FF	FF
FtcF2_3_69	notMM	FF	FF	FF	FF	FF	notMM	FF	notMM	notMM	FF	FF	MF	MF	MF	MF	MF	MF	MF	MF	MF	MF	MF	MF	MF	MF	MF	MF	MF	MF	MF	MF	MF	MF	MF	MF	MF	MF	MF	MF	MF	MF	MF	MF	MF	MF	MF	MF	MF
FtcF2_3_70	MM	MM	MM	MM	MM	MM	MM	notFF	MM	notFF	MM	MM	MM	MM	MM	MM	MM	MM	MM	MM	MM	MM	MM	MM	MM	MM	MM	MM	MM	MM	MM	MM	MM	MM	MM	MM	MM	MM	MM	MM	MM	MM	MM	MM	MM	MM	MM	MM	MM
FtcF2_3_71	MM	MM	MM	MM	MM	MM	MM	notFF	MM	MM	MM	MM	MM	MM	MM	MM	MM	MM	MM	MM	MM	MM	MM	MM	MM	MM	MM	MM	MM	MM	MM	MM	MM	MM	MM	MM	MM	MM	MM	MM	MM	MM	MM	MM	MM	MM	MM	MM	MM
FtcF2_3_72	MF	notMM	notFF	MF	MF	notFF	NA	MF	notMM	MF	MF	MF	MF	MF	MF	MF	MF	MF	MF	MF	MF	MF	MF	MF	MF	MF	MF	MF	MF	MF	MF	MF	notFF	MF	MF	MF	MF	MF	MF	MF	MF	MF	MF	MF	MF	MF	MF	MF	MF
FtcF2_4_1	notMM	notMM	notMM	FF	FF	notMM	FF	notMM	notMM	notMM	FF	FF	notMM	notMM	notMM	FF	FF	notMM	FF	notMM	FF	FF	FF	FF	FF	FF	FF	FF	FF	FF	FF	FF	notMM	FF	FF	FF	FF	FF	FF	FF	FF	FF	FF	FF	FF	FF	FF	FF	FF
FtcF2_4_2	notFF	notFF	notFF	notFF	MM	NA	notFF	notMM	MF	notMM	MF	notMM	MF	MF	MF	FF	notFF	NA	MF	MF	MF	MF	MF	MF	MF	notMM	MF	MF	MF	MF	MF	MF	NA	MF	MF	MF	MF	MF	notFF	MF	MF	MF	notMM	MF	MF	notMM	notMM	MF	MF
FtcF2_4_3	notFF	MF	notMM	MF	MF	MF	notMM	MF	MF	MF	MF	MF	MF	MF	MF	MF	MF	MF	MF	MF	MF	MF	MF	MF	MF	MF	MF	MF	MF	MF	MF	MF	MF	MF	MF	MF	MF	MF	MF	MF	MF	MF	MF	MF	MF	notFF	MF	MF	MF
FtcF2_4_4	MF	MF	notFF	MF	MF	MF	MF	MF	notFF	notMM	MF	MF	MF	MF	MF	MF	MM	MM	MM	MM	MM	MM	MM	MM	MM	MM	MM	MM	MM	MM	MM	MM	MM	MM	MM	MM	MM	MM	MM	MM	MM	MM	MM	MM	MM	MM	MM	MM	MM
FtcF2_4_5	FF	FF	FF	FF	FF	FF	FF	FF	FF	FF	FF	FF	FF	MF	MF	MF	MF	MF	MF	MF	MF	MF	MF	MF	MF	MF	MF	MF	MF	MF	MF	MF	MF	MF	MF	MF	MF	MF	MF	MF	MF	MF	MF	MF	MF	MF	MF	MF	MF
FtcF2_4_6	FF	FF	FF	FF	FF	FF	FF	FF	FF	FF	FF	FF	FF	FF	FF	FF	FF	FF	FF	FF	FF	FF	FF	FF	FF	FF	FF	FF	FF	FF	FF	FF	FF	FF	FF	FF	FF	FF	FF	FF	FF	FF	FF	FF	FF	FF	FF	FF	FF
FtcF2_4_7	MF	MF	MF	MF	notFF	MF	MF	notFF	MF	notFF	MF	MF	MF	notMM	MF	MF	MF	MF	MF	MF	MF	MF	MF	MF	MF	MF	MF	MF	MF	MF	MF	MF	MF	MF	MF	MF	MF	MF	MF	MF	MF	MF	MF	MF	MF	MF	MF	MF	MF
FtcF2_4_8	notMM	MF	notMM	notFF	MF	MF	NA	MF	MF	notFF	MM	MM	notFF	MM	notFF	MM	MM	MM	MM	MM	MM	MM	MM	MM	MM	MM	MM	MM	MM	MM	MM	MM	notFF	MM	MM	MM	MM	MM	MM	MM	MM	MM	MM	MM	MM	MM	MM	MM	MM
FtcF2_4_9	MF	notMM	MF	MF	MF	MF	MF	MF	MF	MF	MF	MF	MF	MF	MF	MF	MF	MF	MF	MF	MF	MF	MF	MF	MF	MF	MF	MF	MF	MF	MF	MF	MF	MF	MF	MF	MF	MF	MF	MF	MF	MF	MF	MF	MF	MF	MF	MF	MF
FtcF2_4_10	notFF	notFF	NA	MM	MM	notFF	NA	notFF	notFF	notFF	MM	MM	MM	notFF	MF	notMM	MF	NA	notMM	MF	MF	MF	MF	MF	MF	MF	MF	MF	MF	MF	MF	MF	NA	MF	MF	MF	MF	MF	MF	MF	MF	MF	MF	notFF	MF	notMM	MF	MF	MF
FtcF2_4_12	notFF	MM	notFF	MM	MM	MM	notFF	notFF	notFF	notFF	MM	MM	MM	MM	MM	MM	MM	notFF	MM	MM	MM	MM	MM	MM	MF	MF	MF	MF	MF	MF	MF	MF	notMM	MF	MF	MF	MF	MF	MF	MF	MF	MF	MF	MF	MF	MF	notMM	MF	MF
FtcF2_4_13	MF	notMM	NA	MF	MF	MM	notFF	notFF	notFF	notFF	MM	MM	MM	MM	MM	MM	MM	MM	MM	MM	MM	MM	MM	MM	MM	MM	MM	MM	MM	MM	MM	MM	notFF	MM	MM	MM	MM	MM	MM	MM	MM	MM	MM	MM	MM	MM	MM	MM	MM
FtcF2_4_16	notFF	notFF	MM	MM	MM	MM	notFF	notFF	notFF	notFF	MM	MM	MM	MM	MM	MM	MM	notFF	MM	MM	MM	MM	MM	MM	MM	MM	MM	MM	MM	MF	MM	MF	MF	MF	MF	MF	MF	MF	MF	MF	MF	MF	MF	MF	MF	MF	MF	MF	MM
FtcF2_4_17	MF	MF	notMM	MF	MF	notFF	notMM	MF	notMM	MF	MF	MF	MF	FF	MF	MF	MF	MF	MF	MF	MF	MF	MF	MF	MF	MF	MF	MF	MF	MF	MF	MF	notFF	MF	MF	MF	MF	MF	MF	MF	MF	MF	MF	MF	MF	MF	MF	MF	MF
FtcF2_4_18	notFF	MM	notFF	MM	MM	MM	MM	notFF	MF	MF	notMM	FF	FF	FF	FF	FF	FF	notMM	FF	FF	FF	FF	FF	FF	FF	FF	FF	FF	FF	FF	FF	FF	notMM	FF	FF	FF	FF	FF	FF	FF	FF	FF	FF	FF	FF	FF	FF	FF	FF
FtcF2_4_20	notMM	FF	notMM	FF	FF	FF	notMM	notMM	notMM	notMM	notMM	MF	MF	MF	notFF	MF	MF	MF	MF	MF	MF	MF	MF	MF	MF	MF	MF	MF	MF	MF	MF	MF	notFF	MF	MF	MF	MF	MF	MF	MF	MF	MF	MF	MF	MF	notFF	MF	MF	MF
FtcF2_4_21	MF	MF	MF	MF	MF	MF	MM	MF	MF	MF	MF	MF	MM	MM	MM	MM	MM	MM	MM	MM	MM	MM	MM	MM	MM	MM	MM	MM	MM	MM	MM	MM	MM	MM	MM	MM	MM	MM	MM	MM	MM	MM	MM	MM	MM	MM	MM	MM	MM
FtcF2_4_22	notFF	NA	notFF	notMM	MF	notMM	NA	MF	notFF	notFF	MF	MF	MF	notMM	notMM	notFF	MF	notMM	MF	MF	MF	MF	MF	MF	MF	MF	MF	MF	MF	MM	MF	notFF	MF	MF	MF	MF	MF	MF	MF	MF	MF	MF	MF	MF	MF	notMM	MF	MF	MF
FtcF2_4_26	notFF	MF	notMM	MF	notMM	MM	notFF	notFF	NA	NA	MF	MF	MF	MF	notMM	MF	MM	notFF	notFF	MM	MM	MM	MM	MM	MM	MM	MM	MM	MM	MM	MM	MM	NA	MM	MM	MM	MM	MM	MM	MM	MM	MM	MM	MM	MM	notFF	MM	MM	MM
FtcF2_4_27	MF	notMM	MF	MF	MF	MF	NA	MF	MF	NA	MM	MM	MM	MM	MM	MM	MM	MM	MM	MM	MM	MM	MM	MM	MM	MM	MM	MM	MM	MM	MM	MM	notFF	MM	MM	MM	MM	MM	MM	MM	MM	MM	notFF	MM	MM	MM	MM	MM	MM
FtcF2_4_28	notMM	NA	notMM	FF	FF	FF	NA	notMM	MF	NA	FF	FF	FF	notMM	notMM	notMM	notMM	notMM	notFF	MF	MF	MF	MF	MF	MF	MF	MF	MF	MF	MF	MF	MF	notFF	MF	MF	MF	MF	MF	MF	MF	MF	MF	notFF	MF	MF	MF	MF	MF	MF
FtcF2_4_30	FF	notMM	notMM	FF	FF	FF	notMM	notMM	notMM	notMM	FF	FF	notMM	MF	MF	MF	notFF	MF	MF	MF	MF	MF	MF	MF	MF	MF	MF	MF	MF	MF	MF	MF	MF	MF	MF	MF	MF	MF	MF	MF	MF	MF	MF	MF	MF	MF	MF	MF	MF
FtcF2_4_31	notMM	FF	FF	FF	FF	MF	MF	MF	MF	MF	MF	MF	MF	MF	MF	MF	MF	MF	MF	MF	MF	MF	MF	MF	MF	MF	MF	MF	MF	FF	FF	FF	FF	FF	FF	FF	FF	FF	FF	FF	FF	FF	FF	FF	FF	FF	FF	FF	FF
FtcF2_4_32	MM	MM	MM	MM	MM	MM	notFF	MF	MF	MF	MF	MF	MF	MF	MF	MF	MF	MF	MF	MF	MF	MF	MF	MF	MF	MF	MF	MF	MF	MF	MF	MF	MF	MF	MF	MF	MF	MF	MF	MF	MF	MF	MF	MF	MF	MF	MF	MF	MF
FtcF2_4_33	MF	MF	MF	MF	MF	MF	notMM	MF	notFF	notMM	MF	MF	MF	FF	FF	FF	FF	notMM	FF	FF	FF	FF	FF	FF	FF	FF	FF	FF	FF	FF	FF	FF	FF	FF	FF	FF	FF	FF	FF	FF	FF	FF	FF	FF	FF	FF	FF	FF	FF
FtcF2_4_34	notMM	NA	MF	MF	MF	MF	notFF	notMM	MF	notFF	MF	MF	MM	MM	notFF	MM	MM	notFF	notFF	MM	MM	MM	MM	MM	MM	MM	MM	MM	MM	MM	MM	MM	notFF	MM	MM	MM	MM	MM	MM	MM	MM	MM	MM	MM	MM	MM	MM	MM	MM
FtcF2_4_35	NA	notMM	NA	MF	notFF	MF	notFF	NA	NA	notFF	MF	MF	MF	notMM	MF	notFF	MF	notMM	notMM	FF	FF	FF	FF	FF	FF	FF	FF	FF	FF	FF	FF	notMM	notMM	FF	FF	FF	FF	FF	FF	notMM	FF	FF	notMM	FF	FF	notMM	FF	FF	FF
FtcF2_4_36	FF	FF	FF	FF	FF	FF	FF	notMM	FF	FF	MF	MF	MF	MF	MF	MF	MF	MF	MF	MF	MF	MF	MF	MF	MF	MF	MF	MF	MF	MF	MF	MF	MF	MF	MF	MF	MF	MF	MF	MF	MF	MF	MF	MF	MF	MF	MF	MF	MF
FtcF2_4_37	MF	notMM	MF	MF	MF	MF	notMM	MF	notFF	MF	FF	FF	FF	FF	FF	FF	FF	notMM	FF	FF	FF	FF	FF	FF	FF	FF	FF	FF	FF	FF	FF	FF	notMM	FF	FF	FF	FF	FF	FF	FF	FF	notMM	FF	FF	FF	notMM	FF	FF	FF
FtcF2_4_38	notFF	notFF	MM	MM	MM	MM	notFF	MM	notFF	MM	MM	MM	MF	MF	MF	MF	MF	notMM	MF	MF	MF	FF	FF	FF	FF	FF	FF	FF	FF	FF	FF	FF	FF	FF	FF	FF	FF	FF	FF	FF	FF	FF	FF	FF	FF	FF	FF	FF	FF
FtcF2_4_39	MM	MM	MM	MM	MM	MM	MM	MM	MM	MM	MF	MF	MF	MF	MF	FF	FF	FF	FF	FF	FF	FF	FF	FF	FF	FF	FF	FF	FF	FF	FF	FF	FF	FF	FF	FF	FF	FF	FF	FF	FF	FF	FF	FF	FF	FF	FF	FF	FF
FtcF2_4_40	MF	notMM	notFF	MM	notFF	notFF	NA	notFF	NA	NA	MM	MM	notFF	MM	notFF	MM	notFF	notFF	MM	MM	MM	MM	MM	MM	MM	MM	MM	MM	MM	MM	MM	MM	notFF	MM	MM	MM	MM	MM	MM	MM	MM	MM	MM	MM	MM	notFF	MM	MM	MM
FtcF2_4_41	notMM	notMM	notMM	notMM	MF	MF	notFF	MF	notFF	MF	MF	MF	MF	notFF	MF	MF	MF	notMM	MF	MF	MF	MF	MF	MF	MF	MF	MF	MF	MF	MF	MF	MF	notMM	MF	MF	MF	MF	MF	MF	MF	MF	MF	MF	MF	MF	MF	MF	MF	MF
FtcF2_4_42	NA	NA	notFF	MM	notFF	MF	MM	notFF	notFF	NA	MM	MM	MM	MM	MM	notFF	notFF	notFF	MM	MM	MM	MM	MM	MM	MM	MM	MM	MM	MM	MM	MM	MM	notFF	MM	MM	MM	MM	MM	MM	notFF	MM	MM	MM	MM	MM	MM	MM	MM	MM
FtcF2_4_43	MM	MM	notFF	MM	MM	MM	MM	MM	MM	notFF	MM	MM	MM	MM	MM	MM	MM	MM	MM	MM	MM	MM	MM	MM	MM	MM	MM	MM	MM	MM	MM	MM	notFF	MM	MM	MM	MM	MM	MM	MM	MM	MM	MM	MM	MM	MM	MM	MM	MM
FtcF2_4_44	NA	notFF	notFF	MM	notFF	MM	NA	notFF	notFF	notFF	MM	MM	MM	MM	MM	MM	MM	notFF	MM	MM	MM	MM	MM	MM	MM	MM	MM	MM	MM	MM	MM	MM	notFF	MM	MM	MM	MM	MM	MM	MM	MM	MM	MM	MM	MM	MM	MM	MM	MM
FtcF2_4_45	notFF	notFF	notFF	notMM	NA	notFF	NA	notMM	NA	NA	NA	notFF	MF	NA	notFF	NA	notMM	NA	NA	notMM	MF	notFF	notFF	MF	MF	FF	notMM	MF	notFF	MF	MF	MF	NA	notFF	MF	MF	MF	FF	notFF	notFF	MF	MF	NA	notFF	MF	NA	NA	MF	MF
FtcF2_4_46	notFF	NA	notFF	MF	notMM	NA	NA	notFF	notFF	NA	notFF	notMM	MF	notFF	MF	MF	notMM	notMM	notMM	MF	MF	MF	MF	MF	MF	MF	MF	MF	MF	MF	MF	MF	notFF	MF	MF	MF	MF	notFF	MF	notMM	notFF	MF	notMM	MF	FF	NA	MF	MF	MF
FtcF2_4_47	MM	MM	MM	MM	MM	MM	MM	MM	MM	notFF	MF	MF	MF	MF	MF	MF	MF	MF	MF	MF	MF	MF	MF	MF	MF	MF	MF	FF	FF	FF	FF	FF	FF	FF	FF	FF	FF	FF	FF	FF	FF	FF	FF	FF	FF	FF	FF	FF	FF
FtcF2_4_48	MF	MF	MF	MF	MF	MF	MF	MF	MF	MF	MF	MF	MF	MF	MF	MF	MF	MF	MF	MF	MF	MF	MF	MF	MF	MF	MF	MF	MF	MF	MF	MF	MF	MF	MF	MF	MF	MF	MF	MF	MF	MF	MF	MF	MF	MF	MF	MF	MF
FtcF2_4_49	notMM	FF	FF	FF	FF	FF	FF	FF	FF	notMM	FF	FF	FF	FF	FF	FF	FF	FF	FF	FF	FF	FF	FF	FF	FF	FF	FF	FF	FF	FF	FF	FF	FF	FF	FF	FF	FF	FF	FF	FF	FF	FF	FF	FF	FF	FF	FF	FF	FF
FtcF2_4_50	FF	FF	FF	FF	FF	FF	FF	FF	FF	FF	FF	FF	MF	MF	MF	MF	MF	MF	MF	MF	MF	MF	MF	MF	MF	MF	MF	MF	MF	MF	MF	MF	MF	MF	MF	MF	MF	MF	MF	MF	MF	MF	MF	MF	MF	MF	MF	MF	MF
FtcF2_4_51	FF	FF	FF	FF	FF	FF	FF	FF	FF	FF	MF	MF	MF	MF	MM	MM	MM	MM	MM	MM	MM	MM	MM	MM	MM	MM	MM	MM	MM	MM	MM	MM	MM	MM	MM	MM	MM	MM	MM	MM	MM	MM	MM	MM	MM	MM	MM	MM	MM
FtcF2_4_52	MM	MM	MM	MM	MM	MM	MM	MM	MM	MM	MM	MM	MM	MM	MM	MM	MM	MM	MM	MM	MM	MM	MF	MF	MF	MF	MF	MF	MF	MF	MF	MF	MF	MF	MF	MF	MF	MF	MF	MF	MF	MF	MF	MF	MF	MF	MF	MF	MF
FtcF2_4_53	MF	MF	MF	MF	MF	MF	FF	FF	FF	FF	FF	FF	FF	FF	FF	FF	FF	FF	FF	FF	FF	FF	FF	FF	FF	FF	FF	FF	FF	FF	FF	FF	FF	FF	FF	FF	FF	FF	FF	FF	FF	FF	FF	FF	FF	FF	FF	FF	FF
FtcF2_4_54	FF	FF	FF	FF	FF	FF	notMM	FF	FF	notMM	FF	FF	FF	FF	FF	FF	FF	FF	FF	FF	FF	FF	MF	MF	MF	MF	MF	MF	MF	MF	MF	MF	MF	MF	MF	MF	MF	MF	MF	MF	MF	MF	MF	MF	MF	MF	MF	MF	MF
FtcF2_4_55	MF	MF	MF	MF	MF	MF	MF	MF	MF	MF	MF	MF	MF	MF	MF	MF	MM	MM	MM	MM	MM	MM	MM	MM	MM	MM	MM	MM	MM	MF	MM	MF	MM	MM	MM	MM	MM	MM	MM	MM	MM	MM	MM	MM	MM	MM	MM	MM	MM
FtcF2_4_56	FF	FF	FF	FF	FF	FF	FF	FF	FF	FF	FF	FF	FF	FF	FF	FF	FF	FF	FF	FF	FF	FF	FF	FF	FF	FF	FF	FF	FF	FF	FF	FF	FF	FF	FF	FF	FF	FF	FF	FF	FF	FF	FF	FF	FF	FF	FF	FF	FF
FtcF2_4_57	MF	MF	MF	MF	FF	FF	FF	notMM	FF	notMM	FF	FF	FF	FF	FF	FF	FF	FF	FF	FF	FF	FF	FF	FF	FF	FF	FF	FF	FF	FF	FF	FF	FF	FF	FF	FF	FF	FF	FF	FF	FF	FF	FF	FF	FF	FF	FF	FF	FF
FtcF2_4_58	MF	MF	MF	MF	MF	MF	MF	MF	MF	MF	MF	MF	MF	MF	MF	FF	FF	FF	FF	FF	FF	FF	FF	FF	FF	FF	FF	FF	FF	FF	FF	FF	FF	FF	FF	FF	FF	FF	FF	FF	FF	FF	FF	FF	FF	FF	FF	FF	FF
FtcF2_4_59	MF	MF	MF	MF	MF	MF	notFF	MF	MF	MF	MF	MF	MF	FF	FF	FF	FF	FF	FF	FF	FF	FF	FF	FF	FF	FF	FF	FF	FF	FF	FF	FF	FF	FF	FF	FF	FF	FF	FF	FF	FF	FF	FF	FF	FF	FF	FF	FF	FF
FtcF2_4_61	MM	MM	MM	MM	MM	MM	MM	MM	MM	MM	MM	MM	MF	MF	MF	MF	MF	MF	MF	MF	MF	MF	MF	MF	MF	MF	MF	MF	MF	MM	MF	MM	MF	MF	MF	MF	MF	MF	MF	MF	MF	MF	MF	MF	MF	MF	MF	MF	MF
FtcF2_4_62	MF	MF	MF	MF	MF	MF	MF	MF	MF	MF	MF	MF	MF	MF	MF	MF	MF	MF	MF	MF	MF	MF	MF	MF	MF	MF	MF	MF	MF	MF	MF	MF	MF	MF	MF	MF	MF	MF	MF	MF	MF	MF	MF	MF	MF	MF	MF	MF	MF
FtcF2_4_63	FF	FF	FF	FF	FF	FF	FF	FF	FF	FF	FF	FF	FF	FF	FF	FF	FF	FF	FF	FF	FF	FF	FF	FF	FF	FF	FF	FF	FF	FF	FF	FF	FF	FF	FF	FF	FF	FF	FF	FF	FF	FF	FF	FF	FF	FF	FF	FF	FF
FtcF2_4_64	MM	notFF	notFF	notFF	MM	MM	notFF	notFF	notFF	notFF	MF	notMM	MF	MF	MF	MF	MF	NA	MF	MF	MF	MF	MF	MF	MF	MF	MF	MF	MF	MF	MF	MF	notMM	MF	MF	MF	MF	MF	MF	MF	MF	MF	notFF	MF	MF	notMM	MM	MF	MF
FtcF2_4_65	MF	MF	MF	MF	MF	MF	MF	MF	MF	MF	FF	FF	FF	MF	MF	MF	MF	MF	MF	MF	MF	MF	MF	MF	MF	MF	MF	MF	MF	MF	MF	MF	MF	MF	MF	MF	MF	MF	MF	MF	MF	MF	MF	MF	MF	MF	MF	MF	MF
FtcF2_4_66	notFF	MF	MF	MF	MF	MF	MF	MF	MF	MF	MF	MF	MF	MF	MF	MF	MF	MF	MF	MF	MF	MF	MF	MF	MF	MF	MF	MF	MF	MF	MF	MF	MF	MF	MF	MF	MF	MF	MF	MF	MF	MF	MF	MF	MF	MF	MF	MF	MF
FtcF2_5_1	MF	MF	MF	MF	notMM	MF	MM	MF	MF	notMM	MF	MF	MF	FF	MF	MF	MF	MF	MF	MF	MF	MF	MF	MF	MF	MF	MF	MF	MF	MF	MF	MF	MM	MF	MF	MF	MF	MF	MF	MF	MF	MF	MF	MF	MF	MF	MF	MF	MF
FtcF2_5_2	MF	MF	MF	MF	MF	MF	MF	MF	MF	MF	MF	MF	MF	MF	MF	MF	MF	MF	MF	MF	MF	MF	MF	MF	MF	MF	MF	MF	MF	MF	MF	MF	MF	MF	MF	MF	MF	MF	MF	MF	MF	MF	MF	MF	MF	MF	MF	MF	MF
FtcF2_5_3	notMM	notFF	notFF	FF	MF	MF	notFF	notFF	notFF	notFF	MM	MM	MM	MF	notFF	MF	MF	notMM	MF	MF	MF	MF	MF	MF	MF	MF	MF	MF	MF	MF	MF	notMM	notFF	MF	MF	MF	MF	MF	MF	MF	MF	MF	MF	MF	MF	MF	MF	MF	MF
FtcF2_5_4	NA	notFF	notFF	notFF	notFF	MM	notFF	NA	notFF	notFF	MM	MM	MM	notFF	notFF	MM	notFF	notFF	MM	MM	MM	MM	MM	MM	MM	MM	MM	MM	MM	MF	MF	MF	notFF	MF	MF	MF	MF	MF	MF	MF	MF	MF	MF	MF	notMM	MF	MF	MF	MF
FtcF2_5_5	FF	FF	FF	FF	FF	FF	FF	FF	FF	notMM	FF	MF	MF	MF	MF	MF	MF	notFF	MF	MF	MF	MF	MF	MF	MF	MF	MF	MF	MF	MF	MF	MF	MF	MF	MF	MF	MF	MF	MF	MF	MF	MF	MF	MF	MF	MF	MF	MF	MF
FtcF2_5_6	MM	MM	MM	MM	MM	MM	MM	MM	MM	MM	MM	MM	MM	MF	MF	MF	MF	MF	MF	MF	MF	MF	MF	MF	MF	MF	MF	MF	MF	MF	MF	MF	MF	MF	MF	MF	MF	MF	MF	MF	MF	MF	MF	MF	MF	MF	MF	MF	MF
FtcF2_5_7	notMM	FF	notMM	FF	FF	FF	FF	notMM	notMM	notMM	FF	FF	FF	notMM	MF	MF	MF	MF	MF	MF	MF	MF	MF	MF	MF	MF	MF	MF	MF	MF	MF	MF	MF	MF	MF	MF	MF	MF	MF	MF	MF	MF	notFF	MF	MF	notFF	MF	MF	MF
FtcF2_5_8	MM	MM	MM	MM	MM	MM	MM	MM	MM	MM	MM	MM	MM	MM	MM	MM	MM	MM	MM	MM	MM	MM	MM	MM	MM	MM	MM	MM	MM	MM	MM	MM	MM	MM	MM	MM	MM	MM	MM	MM	MM	MM	MM	MM	MM	MM	MM	MM	MM
FtcF2_5_9	FF	FF	FF	FF	FF	FF	MF	MF	MF	MM	MM	MM	MM	MM	MM	MM	MM	MM	MM	MM	MM	MM	MM	MM	MM	MM	MM	MM	MM	MM	MM	MM	MM	MM	MM	MM	MM	MM	MM	MM	MM	MM	MM	MM	MM	MM	MM	MM	MM
FtcF2_5_10	MF	MF	MF	MF	MF	MF	MF	MF	MF	MF	MF	MM	MM	MM	MM	MM	MM	MM	MM	MM	MM	MM	MM	MM	MM	MM	MM	MM	MM	MM	MM	MM	MM	MM	MM	MM	MM	MM	MM	MM	MM	MM	MM	MM	MM	MM	MM	MM	MM
FtcF2_5_11	FF	FF	FF	FF	FF	FF	FF	FF	MF	MF	MF	MF	MM	MM	MM	MM	MM	MM	MM	MM	MM	MM	MM	MM	MM	MM	MM	MM	MM	MF	MM	MF	MM	MM	MM	MM	MM	MM	MM	MM	MM	MM	MM	MM	MM	MM	MM	MM	MM
FtcF2_5_12	notFF	MF	MF	MF	MF	MF	notFF	MF	MF	MF	MF	MF	MF	MF	MF	MF	MF	MF	FF	FF	FF	FF	FF	FF	FF	FF	FF	FF	FF	FF	FF	FF	FF	FF	FF	FF	FF	FF	FF	FF	FF	FF	FF	FF	FF	FF	FF	FF	FF
FtcF2_5_13	FF	FF	FF	FF	FF	FF	FF	FF	FF	FF	FF	MF	MF	MM	MM	MM	MM	MM	MM	MM	MM	MM	MM	MM	MM	MM	MM	MM	MM	MM	MM	MM	MM	MM	MM	MM	MM	MM	MM	MM	MM	MM	MM	MM	MM	MM	MM	MM	MM
FtcF2_5_14	notFF	MF	notFF	MF	MM	MM	notFF	MM	notFF	notFF	MM	MM	MM	MM	MM	MM	MM	MM	MM	MM	MM	MM	MM	MM	MM	MM	MM	MM	MM	MM	MM	MM	MM	MM	MM	MM	MM	MM	MM	MM	MM	MM	MM	MM	MM	MM	MM	MM	MM
FtcF2_5_16	MM	MM	MM	MM	MM	MM	MM	MM	MM	MM	MM	MM	MM	MM	MM	MM	MM	MM	MM	MM	MM	MM	MM	MM	MM	MM	MM	MM	MM	MM	MM	MM	MM	MM	MM	MM	MM	MM	MM	MM	MM	MM	MM	MM	MM	MM	MM	MM	MM
FtcF2_5_17	notMM	notMM	FF	FF	FF	FF	FF	notMM	notMM	notMM	FF	FF	FF	FF	FF	FF	FF	notMM	MF	MF	MF	MF	MF	MF	MF	MF	MF	MF	MF	MF	MF	MF	MF	MF	MF	MF	MF	MF	MF	MF	MF	MF	MF	MF	MF	MF	MF	MF	MF
FtcF2_5_18	MF	notMM	MF	MF	MF	MF	notFF	notFF	MF	MF	MF	MF	MF	MF	MF	MF	MF	MF	MF	MF	MF	MF	MF	MF	MF	MF	MF	MF	MF	MF	MF	MF	notMM	MF	MF	MF	MF	MF	MF	MF	MF	MF	notFF	MF	MF	MF	MF	MF	MF
FtcF2_5_19	MM	MM	MM	MM	MM	MM	MM	notFF	notFF	notFF	MF	MF	MF	MF	MF	MF	MF	notFF	notMM	MF	MF	MF	MF	MF	MF	MF	MF	MF	MF	MF	MF	MF	MF	MF	MF	MF	MF	MF	MF	MF	MF	MF	MF	MF	MF	MF	MF	MF	MF
FtcF2_5_20	notMM	notMM	notMM	FF	FF	FF	NA	FF	notMM	FF	FF	FF	FF	FF	FF	FF	FF	notMM	FF	FF	FF	FF	FF	FF	FF	FF	FF	FF	FF	FF	FF	FF	NA	FF	FF	FF	FF	FF	FF	FF	FF	FF	FF	FF	FF	FF	FF	FF	FF
FtcF2_5_21	MF	notMM	NA	MF	MF	MF	notFF	MF	MF	notMM	MF	MF	MF	notMM	notFF	notMM	notFF	MF	MF	MF	MM	MM	MM	MM	MM	MM	MM	MM	MM	MM	MM	notFF	notFF	MM	MM	MM	MM	MM	MM	MM	MM	MM	notFF	MM	MM	notFF	MM	MM	MM
FtcF2_5_22	notMM	notMM	notMM	notMM	notMM	notMM	FF	NA	notMM	notMM	FF	MF	MF	MF	MF	notFF	MF	notMM	notMM	MF	MF	MF	MF	MF	MF	MF	MF	MF	MF	MF	MF	MF	MF	MF	MF	MF	MF	MF	MF	MF	MF	MF	MF	MF	MF	notFF	MF	MF	MF
FtcF2_5_23	MF	notMM	MF	MF	MF	FF	notMM	FF	FF	notMM	FF	FF	FF	FF	FF	FF	FF	notMM	FF	FF	FF	FF	FF	FF	FF	FF	FF	FF	FF	FF	FF	FF	notMM	FF	FF	FF	FF	FF	FF	FF	FF	FF	FF	FF	FF	FF	FF	FF	FF
FtcF2_5_24	MF	MF	MF	MF	MF	MF	MF	MF	MF	MF	MF	MF	MF	MF	MF	MF	MM	MM	MM	MM	MM	MM	MM	MM	MM	MM	MM	MM	MM	MM	MM	MM	MM	MM	MM	MM	MM	MM	MM	MM	MM	MM	MM	MM	MM	MM	MM	MM	MM
FtcF2_5_25	notMM	notMM	NA	FF	NA	FF	NA	notMM	notMM	notMM	FF	FF	notMM	notMM	MF	MF	notFF	notFF	MF	MF	MF	MF	MF	MF	MF	MF	MF	MF	MF	FF	MF	MF	notFF	MF	MF	MF	MF	MF	MF	MF	MF	MF	notMM	FF	MF	MF	MF	MF	MF
FtcF2_5_26	FF	FF	FF	FF	FF	FF	FF	FF	FF	FF	FF	FF	FF	FF	FF	FF	notMM	MF	MF	MF	MF	MF	MF	MF	MF	MF	MF	MF	MF	MF	MF	MF	MF	MF	MF	MF	MF	MF	MF	MF	MF	MF	MF	MF	MF	MF	MF	MF	MF
FtcF2_5_27	FF	FF	FF	FF	FF	FF	FF	FF	FF	FF	FF	FF	FF	FF	FF	FF	FF	FF	FF	FF	FF	FF	FF	FF	FF	FF	FF	FF	FF	FF	FF	FF	FF	FF	FF	FF	FF	FF	FF	FF	FF	FF	FF	FF	FF	FF	FF	FF	FF
FtcF2_5_28	FF	notMM	FF	FF	FF	FF	MF	MF	MF	notMM	MF	MF	MF	MF	MF	MF	MF	notFF	MF	MF	MF	MF	MF	MF	MF	MF	MF	MF	MF	MF	MF	MF	MF	MF	MF	MF	MF	MF	MF	MF	MF	MF	MF	MF	MF	MF	MF	MF	MF
FtcF2_5_29	MF	MF	MM	MM	MM	MF	MF	MF	MF	notFF	MF	MF	MF	MF	MF	MF	MF	MF	MF	MF	MF	MF	MF	MF	MF	MF	MF	MF	MF	MF	MF	MF	MF	MF	MF	MF	MF	MF	MF	MF	MF	MF	MF	MF	MF	MF	MF	MF	MF
FtcF2_5_31	notMM	notMM	notMM	FF	FF	FF	FF	notMM	notMM	notMM	FF	FF	MF	MF	notFF	MF	MF	MF	MF	MF	notFF	MF	MF	MF	MF	MF	MF	MF	MF	FF	MF	MF	notFF	MF	MF	MF	MF	MF	MF	MF	MF	MF	MF	MF	MF	MF	MF	MF	MF
FtcF2_5_32	MM	MM	MM	MM	MM	MM	MM	MM	MM	notFF	MM	MM	MM	MM	MM	MM	MM	MM	MM	MM	MM	MM	MM	MM	MM	MM	MM	MM	MM	MM	MM	MM	MM	MM	MM	MM	MM	MM	MM	MM	MM	MM	MM	MM	MM	MM	MM	MM	MM
FtcF2_5_33	MF	notFF	MF	MF	FF	FF	FF	FF	notMM	FF	FF	FF	FF	FF	FF	FF	FF	FF	FF	FF	FF	FF	FF	FF	FF	FF	FF	FF	FF	FF	FF	FF	FF	FF	FF	FF	FF	FF	FF	FF	FF	FF	FF	FF	FF	FF	FF	FF	FF
FtcF2_5_34	MF	notFF	notFF	MF	MF	MF	MF	MF	NA	MF	MF	MF	MF	MF	MF	MF	MF	MF	MF	MF	MF	MF	MF	MF	MF	MF	MF	MF	MF	MF	MF	MF	notFF	MF	MF	MF	MF	MF	MF	MF	MF	MF	MF	MF	MF	MF	MF	MF	MF
FtcF2_5_35	MF	notMM	FF	MF	MF	MF	MF	MF	MF	notFF	MF	MF	MF	MF	MF	MM	MM	MM	MM	MM	MM	MM	MM	MM	MM	MM	MM	MM	MM	MM	MM	MM	MM	MM	MM	MM	MM	MM	MM	MM	MM	MM	MM	MM	MM	MM	MM	MM	MM
FtcF2_5_36	notMM	notMM	MF	notMM	MF	notFF	NA	notMM	MF	notMM	MF	FF	FF	notMM	notMM	FF	FF	NA	notMM	FF	FF	FF	FF	FF	FF	FF	FF	FF	FF	FF	FF	FF	notMM	FF	FF	FF	FF	FF	notMM	FF	FF	FF	FF	FF	FF	notMM	FF	FF	FF
FtcF2_5_37	MM	notFF	MM	MM	MM	MM	notFF	MM	notFF	notFF	MM	MM	MM	MM	MM	MM	MM	notFF	MM	MM	MM	MM	MM	MM	MM	MM	MM	MM	MM	MF	MM	MF	MF	MF	MF	MF	MF	MF	MF	MF	MF	MF	MF	MF	MF	MF	MF	MM	MM
FtcF2_5_38	FF	MF	notFF	MF	MF	FF	MF	MF	notMM	MF	MF	MF	MF	notFF	MF	MF	MF	MF	MF	MF	MF	MF	MF	MF	MF	MF	MF	MF	MF	MF	MF	MF	MF	MF	MF	MF	MF	MF	MF	MF	MF	MF	MF	MF	MF	MF	MF	MF	MF
FtcF2_5_39	MF	MF	MF	MF	MF	MF	MF	MF	MF	MF	MF	MF	MF	MM	MM	MM	MM	MM	MM	MM	MM	MM	MM	MM	MM	MM	MM	MM	MM	MM	MM	MM	MM	MM	MM	MM	MM	MM	MM	MM	MM	MM	MM	MM	MM	MM	MM	MM	MM
FtcF2_5_40	notFF	MM	notFF	MM	MM	MM	notFF	notFF	notFF	notFF	MM	MM	MM	MM	MM	MF	MF	notFF	MF	MF	MF	MF	MF	MF	MF	MF	MF	MF	MF	MF	MF	MF	MF	MF	MF	MF	MF	MF	MF	MF	MF	MF	MF	MF	MF	MF	MF	MF	MF
FtcF2_5_41	MM	notFF	MM	MM	MM	MM	notFF	MM	notFF	MF	MF	MF	MF	MF	MF	MF	MF	MF	MF	MF	MF	MF	MF	MF	MF	MF	MF	MF	MF	MF	MF	MF	notFF	MF	MF	MF	MF	MF	MF	MF	MF	MF	MF	MF	MF	MF	MF	MF	MF
FtcF2_5_42	MF	notFF	MF	MF	MF	MF	NA	MF	notFF	notMM	notMM	FF	FF	FF	FF	FF	FF	notMM	FF	FF	FF	FF	FF	FF	FF	FF	FF	FF	FF	FF	FF	FF	notMM	FF	FF	FF	FF	FF	FF	FF	FF	FF	FF	FF	FF	notMM	FF	FF	FF
FtcF2_5_43	MF	MF	MF	MF	notFF	MF	notMM	notFF	MF	MF	MF	MF	MF	MF	MF	MF	MF	MF	notMM	MF	MF	MF	MF	MF	MF	MF	MF	MF	MF	MF	MF	MF	MF	MF	MF	MF	MF	MF	MF	MF	MF	MF	MF	MF	MF	notFF	MF	MF	MF
FtcF2_5_44	MF	notFF	MF	MF	MF	MF	notFF	notFF	FF	MF	MF	MM	MM	MM	MM	MM	MM	notFF	notFF	MM	MM	MM	MM	MM	MM	MM	MM	MM	MM	MM	MM	MM	notFF	MM	MM	MM	MM	MM	MM	MM	MM	MM	MM	MM	MM	MM	MM	MM	MM
FtcF2_5_45	notFF	MM	MM	MM	MM	MM	notFF	MM	MM	MM	MM	MF	MF	MF	MF	MF	MF	MF	MF	MF	MF	MF	MF	MF	MF	MF	MF	MF	MF	MF	MF	MF	MF	MF	MF	MF	MF	MF	MF	MF	MF	MF	MF	MF	MF	MF	MF	MF	MF
FtcF2_5_46	FF	FF	FF	FF	MF	MF	MF	MF	MF	MF	MF	MF	MF	MF	MF	MF	MF	MF	MF	MF	MF	MF	MF	MF	MF	MF	MF	MF	MF	MF	MF	MF	MM	MF	MF	MF	MF	MF	MF	MF	MF	MF	MF	MF	MF	MF	MF	MF	MF
FtcF2_5_47	FF	FF	FF	FF	FF	FF	FF	FF	FF	FF	FF	FF	FF	FF	FF	FF	FF	FF	FF	FF	FF	FF	FF	FF	FF	FF	FF	FF	FF	FF	FF	FF	FF	FF	FF	FF	FF	FF	FF	FF	FF	FF	FF	FF	FF	FF	FF	FF	FF
FtcF2_5_48	MF	MM	MF	MF	MF	MF	MF	MF	MF	MF	MF	MF	MF	MF	MF	MF	MF	MF	MF	MF	MF	MF	MF	MF	MF	MF	MF	MF	MF	MF	MF	MF	MF	MF	MF	MF	MF	MF	MF	MF	MF	MF	MF	MF	MF	MF	MF	MF	MF
FtcF2_5_49	FF	notMM	FF	FF	FF	FF	FF	FF	FF	notMM	FF	FF	FF	FF	FF	FF	FF	FF	FF	FF	FF	FF	FF	FF	FF	FF	FF	FF	FF	FF	FF	FF	FF	FF	FF	FF	FF	FF	FF	FF	FF	FF	FF	FF	FF	FF	FF	FF	FF
FtcF2_5_50	FF	FF	notMM	FF	FF	FF	notMM	notMM	notMM	notMM	MF	MF	MF	MF	MF	MF	MF	notFF	MF	MF	MF	MF	MF	MF	MF	MF	MF	MF	MF	MF	MF	MF	notMM	MF	MF	MF	MF	MF	MF	MF	MF	MF	MF	MF	MF	notFF	MF	MF	MF
FtcF2_5_51	notFF	MM	notFF	MF	MF	MF	notFF	MF	notMM	notMM	MF	MF	MF	MF	MF	MF	MF	MF	MF	MF	MF	MF	MF	MF	MF	MF	MF	MF	MF	MF	MF	MF	MF	MF	MF	MF	MF	MF	MF	MF	MF	MF	MF	MF	MF	MF	MF	MF	MF
FtcF2_5_52	MF	notFF	MF	MF	MF	MF	MF	MF	MF	MF	MF	MF	MF	MF	MF	MF	MF	MF	MF	MF	MF	MF	MF	MF	MF	MF	MF	MF	MF	MF	MF	MF	MF	MF	MF	MF	MF	MF	MF	MF	MF	MF	MF	MF	MF	MF	MF	MF	MF
FtcF2_5_53	FF	notMM	FF	FF	FF	FF	FF	FF	FF	notMM	FF	FF	FF	FF	FF	FF	FF	FF	FF	FF	FF	FF	FF	FF	FF	FF	FF	FF	FF	FF	FF	FF	FF	FF	FF	FF	FF	FF	FF	FF	FF	FF	FF	FF	FF	FF	FF	FF	FF
FtcF2_5_54	NA	notMM	FF	notMM	FF	notMM	NA	notMM	notMM	notMM	FF	FF	FF	FF	FF	FF	notMM	NA	notMM	FF	FF	FF	FF	FF	FF	FF	FF	FF	FF	FF	FF	FF	notMM	FF	FF	FF	FF	FF	FF	FF	FF	FF	FF	FF	FF	notMM	FF	FF	FF
[truncated: 952 more columns]

## Sheet: Phenotypes
id	SL	Sex	AvgPlates	LateralGRLength	MiddleGRLength	MedialGRLength	LateralGRLength_SLadjusted	MiddleGRLength_SLadjusted	MedialGRLength_SLadjusted
FtcF2_1_1	37.2	F	32.5	1043.5	968.1	736.3	1070.3	996.5	757.1
FtcF2_1_2	40.42	F	28	1028.3	976.5	513.4	973.7	918.7	471.2
FtcF2_1_3	39.25	F	16.5	1001.1	876.6	500.3	976.1	850.1	481
FtcF2_1_4	49.39	F	31.5	1213.6	1189	681.4	932.2	890.8	463.7
FtcF2_1_5	34.63	F	7	985.9	865	441.7	1077.7	962.3	512.7
FtcF2_1_6	31.21	F	31	NA	NA	NA	NA	NA	NA
FtcF2_1_7	33.35	F	32	790.2	825.3	461.6	914.4	956.9	557.7
FtcF2_1_8	32.26	F	31.5	847.3	779.2	471	999	940	588.4
FtcF2_1_9	34.16	M	32	992.2	966	499.2	1095.9	1075.9	579.4
FtcF2_1_10	41.16	F	33.5	1129.3	1135.1	539.5	1056	1057.4	482.8
FtcF2_1_11	37.59	M	31.5	1037.2	934.6	726.4	1054.2	952.6	739.5
FtcF2_1_12	28.66	M	7	734.7	650.5	368.4	977.4	907.8	556.2
FtcF2_1_13	38.06	F	34	904.3	1004.8	498.2	909.4	1010.2	502.1
FtcF2_1_14	35.88	M	34.5	999	1011.6	581.4	1059.2	1075.4	628
FtcF2_1_15	33.68	M	31.5	837.3	756.2	630.1	953.1	879	719.7
FtcF2_1_16	34.95	F	32	844.6	864	634.3	928.3	952.7	699.1
FtcF2_1_17	34.63	F	18.5	871.8	785.5	579.3	963.6	882.8	650.3
FtcF2_1_18	44.29	F	34.5	1194.2	1093.7	559.4	1041.8	932.2	441.5
FtcF2_1_19	30.5	F	8	861.9	688.2	401.9	1058.1	896.2	553.7
FtcF2_1_20	32.74	F	32.5	999	749.9	454.8	1138.6	897.9	562.8
FtcF2_1_21	29.7	M	32	823.7	755.1	464.7	1040.2	984.5	632.2
FtcF2_1_22	34.31	M	33.5	880.7	853	543.2	980.6	958.9	620.5
FtcF2_1_23	34.91	F	6.5	884.4	812.7	538	969.1	902.5	603.6
FtcF2_1_24	31.61	F	32.5	875.5	852	607.1	1043.7	1030.2	737.2
FtcF2_1_25	28.01	M	33.5	698.1	650	420.2	957.3	924.7	620.8
FtcF2_1_26	32.09	M	33	862.4	747.8	464.7	1018.4	913.2	585.4
FtcF2_1_27	30.58	M	34	819	824.8	519.1	1013.2	1030.6	669.4
FtcF2_1_28	42.18	M	33.5	1185.8	1162.3	744.2	1086.7	1057.3	667.5
FtcF2_1_29	38.17	F	32	1124.6	891.7	458.4	1126.9	894.2	460.2
FtcF2_1_30	45.02	M	33.5	1118.9	1220.9	698.6	948	1039.8	566.4
FtcF2_1_31	34.74	F	32	NA	NA	NA	NA	NA	NA
FtcF2_1_32	47.09	M	32.5	1428.1	1343.9	798.6	1204.9	1107.3	625.9
FtcF2_1_33	36.12	M	32	927.8	837.3	739.4	981.9	894.7	781.3
FtcF2_1_34	47.55	M	32.5	979.1	983.8	883.4	744.3	734.9	701.7
FtcF2_1_35	37.82	M	28.5	813.2	880.2	544.3	824.4	892	552.9
FtcF2_1_36	38.85	M	28	779.2	787.1	448.5	764.3	771.3	437
FtcF2_1_37	45.96	F	32	988.5	876.6	653.6	793.9	670.3	503
FtcF2_1_38	33.69	M	7	674.6	644.2	334.9	790.2	766.7	424.3
FtcF2_1_39	43.04	F	32.5	1081.7	1030.4	871.8	960.9	902.4	778.3
FtcF2_1_40	40.12	M	6	976	905.9	654.1	929	856.1	617.7
FtcF2_1_41	38.55	M	34	1134.6	1030.4	601.8	1127.3	1022.7	596.2
FtcF2_1_42	32.25	M	32.5	745.2	792.3	443.3	897.2	953.4	560.9
FtcF2_1_43	48.42	F	29.5	1383.1	1183.7	713.8	1126.3	911.5	515.1
FtcF2_1_44	38.36	F	6.5	976	865	628	973.5	862.4	626.1
FtcF2_1_45	32.02	M	33.5	850.9	793.9	472	1008.7	961.1	594.1
FtcF2_1_46	33.23	M	31.5	711.7	709.6	457.4	838.9	844.4	555.8
FtcF2_1_47	44.56	M	34	1231.4	1285.3	742.1	1072.2	1116.5	618.9
FtcF2_1_48	41.45	M	33	1154.4	1012.1	562.6	1073.8	926.7	500.2
FtcF2_1_49	35.67	M	21.5	870.3	892.8	619.1	935.8	962.2	669.8
FtcF2_1_50	37.79	M	6.5	855.1	789.2	685	867	801.8	694.2
FtcF2_1_51	33	M	24.5	826.8	848.3	483.5	959.8	989.3	586.4
FtcF2_1_52	34.09	F	32	780.3	786	425.5	885.8	897.8	507.1
FtcF2_1_53	29.52	F	6	786	710.7	334.4	1007	944.9	505.4
FtcF2_1_54	45.71	F	32.5	1175.9	1150.8	780.3	987.6	951.2	634.6
FtcF2_1_55	45.53	F	32.5	1269.6	1202.6	927.3	1085.8	1007.8	785.1
FtcF2_1_56	36.34	F	32	1112.1	940.4	563.1	1160.7	991.9	600.7
FtcF2_1_57	45.06	F	34.5	1197.9	1126.7	590.3	1026	944.5	457.3
FtcF2_1_58	45.88	M	31	1170.1	1024.7	851.4	977.5	820.6	702.4
FtcF2_1_59	31.78	F	6	795.4	690.3	496.1	959.3	864	622.9
FtcF2_1_60	39.45	F	32	960.8	884.4	534.3	930.8	852.6	511
FtcF2_1_61	41.66	F	33	1253.3	1176.4	585.6	1167.4	1085.3	519.1
FtcF2_1_62	35.78	M	7	993.8	870.3	633.2	1056.5	936.8	681.7
FtcF2_1_63	32.72	F	33.5	679.3	709.6	374.2	819.4	858.1	482.6
FtcF2_1_64	36.61	M	32	1223.5	1055	666.7	1265.3	1099.3	699
FtcF2_1_65	48.72	F	32.5	1079.1	1308.3	991.7	814.7	1028.1	787.1
FtcF2_1_66	30.74	M	6	779.7	706.5	399.8	969.9	908	547
FtcF2_1_67	30.38	M	7.5	841.5	755.7	551.1	1040.8	966.9	705.3
FtcF2_1_68	36.01	F	31	940.4	989.1	576.7	997.3	1049.4	620.7
FtcF2_1_69	40.14	M	34.5	1060.2	1074.4	417.6	1012.7	1024.1	380.8
FtcF2_1_70	28.5	F	29	823.7	612.8	531.2	1070.5	874.4	722.2
FtcF2_1_71	42.37	F	32	1124.6	867.7	711.2	1020.7	757.6	630.8
FtcF2_1_72	26.85	F	18	NA	754.1	514.9	NA	1059.9	738.2
FtcF2_1_73	41.76	M	34.5	1172.8	1173.8	712.8	1084.4	1080.1	644.4
FtcF2_1_74	45.36	F	31.5	1147.1	1184.8	605.5	967.6	994.6	466.6
FtcF2_1_75	44.39	F	33	1284.7	1349.1	967.6	1129.8	1184.9	847.7
FtcF2_1_76	48.42	F	32.5	1231.4	1228.2	840.5	974.6	956	641.8
FtcF2_1_77	34.98	M	24	923.7	810.1	526.5	1006.7	898	590.7
FtcF2_1_78	30.99	F	31	855.6	686.1	635.8	1039.4	880.9	778.1
FtcF2_1_79	37.99	M	28.5	1018.4	844.1	612.3	1025.3	851.4	617.6
FtcF2_1_80	34.49	M	7.5	989.6	879.2	607.1	1085	980.3	680.9
FtcF2_1_81	33.72	F	32.5	798.6	807	418.1	913.4	928.7	507
FtcF2_1_82	42.2	F	6	988	1024.7	592.9	888.4	919.2	515.8
FtcF2_1_83	41.91	F	32	987.5	1065.5	612.3	895.3	967.7	540.9
FtcF2_1_84	43.62	F	6	1109.4	977.6	729	973.9	834	624.2
FtcF2_1_85	48.26	F	22.5	1123	1309.3	844.1	870.2	1041.4	648.5
FtcF2_1_86	38.62	M	34	1054.5	1090.6	577.7	1045.4	1081	570.7
FtcF2_1_87	42.45	M	7	1048.7	1150.8	652.1	942.8	1038.6	570.2
FtcF2_1_88	39.88	M	29.5	1072.3	1082.7	779.7	1031.4	1039.3	748
FtcF2_1_89	32.21	M	8	942	835.2	468.4	1095	997.4	586.8
FtcF2_1_90	31.5	F	7	859.8	695	438.5	1030.7	876.2	570.8
FtcF2_1_91	44.56	F	33	1145.5	1069.7	686.1	986.3	900.9	562.9
FtcF2_1_92	44.21	F	33.5	1190	1080.1	678.7	1039.6	920.7	562.3
FtcF2_1_93	46.26	F	33.5	1157.1	1063.4	730	954.9	849.1	573.5
FtcF2_1_94	39.52	M	6	1038.8	819	548.4	1007	785.3	523.8
FtcF2_1_95	39.84	F	32.5	945.1	NA	525.4	905.2	NA	494.5
FtcF2_1_96	38.15	F	32.5	1019.9	1032.5	640	1022.7	1035.5	642.2
FtcF2_1_97	51.99	F	33	NA	1299.9	743.1	NA	932	474.5
FtcF2_1_98	36.46	M	31.5	934.6	834.2	562.6	980.1	882.5	597.8
FtcF2_1_99	45.81	M	33	1292.1	1175.4	836.8	1101.3	973.1	689.1
FtcF2_1_100	40.21	F	32.5	1155.5	1030.4	552.1	1106.2	978.2	514
FtcF2_1_101	41.33	F	30	NA	792.3	NA	NA	710.1	NA
FtcF2_1_102	39.55	M	23	1034.6	787.1	534.8	1002	752.6	509.6
FtcF2_1_103	28.65	F	5	796	582.5	406.6	1039	840	594.6
FtcF2_1_104	38.52	F	32	931.5	951.9	525.9	925	945	520.8
FtcF2_1_105	26.51	M	6.5	648.9	605	NA	946	919.9	NA
FtcF2_1_106	33.48	F	6	NA	662.5	349.6	NA	790.6	443.1
FtcF2_1_107	28.9	F	6	572	597.1	368.9	808.7	847.9	552
FtcF2_1_108	25.85	M	29	643.7	514.4	NA	957.5	847	NA
FtcF2_2_2	47.8	F	34	1283.2	1099.5	861.4	1042	843.9	674.8
FtcF2_2_3	46.84	M	31.5	1277.9	1141.4	795.4	1061	911.5	627.6
FtcF2_2_4	41.46	F	33	1023.1	890.7	722.2	942.2	805	659.6
FtcF2_2_5	36.69	F	32.5	983.3	912.1	614.9	1023	954.2	645.6
FtcF2_2_6	36.62	M	33.5	1178.5	989.6	860.3	1220	1033.6	892.4
FtcF2_2_7	32.26	M	6	840.5	706	501.3	992.2	866.8	618.7
FtcF2_2_8	44.12	F	33	1339.2	1263.8	889.6	1191.1	1106.8	775
FtcF2_2_9	35.48	M	33	1116.2	906.9	619.1	1186.5	981.4	673.5
FtcF2_2_10	41.62	M	33.5	1048.7	973.9	593.4	963.8	883.9	527.7
FtcF2_2_11	36.29	M	9.5	938.3	849.3	658.9	988.1	902.1	697.5
FtcF2_2_12	39.62	M	6	1045.1	881.8	628.5	1010.8	845.4	601.9
FtcF2_2_13	43.5	M	31.5	1088	1097.4	674.6	955.6	957	572.1
FtcF2_2_14	38.76	M	6	1379.5	1320.9	842.5	1366.9	1307.5	832.7
FtcF2_2_15	41.09	M	32.5	1279	1105.8	789.2	1207.5	1030	733.9
FtcF2_2_16	36.21	F	31	892.3	806.4	568.8	944.2	861.4	608.9
FtcF2_2_17	46.76	F	15.5	1052.4	796.5	701.2	837.5	568.8	534.9
FtcF2_2_18	40.14	M	33	1272.7	1240.8	802.8	1225.2	1190.5	766
FtcF2_2_19	38.15	F	32	1063.9	911.6	642.1	1066.7	914.6	644.3
FtcF2_2_20	37.57	F	31	1030.4	850.9	648.9	1047.9	869.4	662.4
FtcF2_2_21	41.21	M	33.5	1203.6	1075.9	878.1	1129.1	996.9	820.4
FtcF2_2_22	37.73	M	33	1213.6	1070.2	633.7	1227	1084.4	644.1
FtcF2_2_23	35.17	M	32	861.4	931	697.6	939.6	1013.8	758.1
FtcF2_2_24	38.55	F	25	833.6	694.4	584	826.3	686.7	578.4
FtcF2_2_25	35.84	M	34	NA	NA	570.9	NA	NA	618.3
FtcF2_2_26	36.09	M	7.5	939.9	921.6	680.8	994.8	979.8	723.3
FtcF2_2_27	36.5	F	31	899.6	825.8	712.8	944.1	873	747.3
FtcF2_2_28	36.89	F	33	1091.6	998	701.2	1126.3	1034.8	728
FtcF2_2_29	43.26	M	32	974.9	779.2	669.8	848.5	645.3	572
FtcF2_2_30	38.07	F	31.5	1110	921.6	566.8	1114.8	926.7	570.5
FtcF2_2_31	40.28	F	32.5	1015.2	925.8	670.4	964.2	871.7	630.9
FtcF2_2_32	31.36	M	6	793.4	659.4	465.2	967.9	844.3	600.2
FtcF2_2_33	31.7	M	31.5	1000.1	867.1	515.5	1166	1042.9	643.9
FtcF2_2_34	38.85	M	32.5	864	912.7	618.6	849.1	896.9	607.1
FtcF2_2_35	37.62	F	32	1009.5	993.8	762	1025.7	1011	774.6
FtcF2_2_36	38.62	M	32.5	1080.7	1074.9	861.4	1071.6	1065.3	854.4
FtcF2_2_37	41.97	M	6.5	1080.7	968.1	713.8	986.9	868.7	641.2
FtcF2_2_38	33.28	M	7	725.8	600.8	430.7	851.7	734.3	528.2
FtcF2_2_39	40.19	M	32	NA	962.9	759.3	NA	911.2	721.6
FtcF2_2_40	38.27	F	6	1038.3	1014.2	503.4	1038.1	1014	503.2
FtcF2_2_41	46.64	F	32.5	1242.9	1199.4	841.5	1031.1	974.9	677.6
FtcF2_2_42	34.94	F	30.5	897.5	814.8	645.3	981.5	903.8	710.3
FtcF2_2_43	34.56	M	30	959.2	916.3	529.1	1052.8	1015.5	601.5
FtcF2_2_44	38.17	F	30	1025.7	872.4	692.9	1028	874.9	694.7
FtcF2_2_45	36.36	M	30.5	868.7	831.6	561.5	916.8	882.6	598.7
FtcF2_2_46	36.98	F	32.5	1044	939.9	648.4	1076.4	974.2	673.5
FtcF2_2_47	36.37	F	30	978.6	883.4	691.8	1026.4	934.1	728.8
FtcF2_2_48	37.76	M	31.5	1170.7	1076.5	697.1	1183.4	1089.9	706.9
FtcF2_2_49	37.45	M	31.5	1113.1	NA	719	1133.6	NA	734.9
FtcF2_2_50	42.56	F	33.5	1033.6	1050.3	733.7	924.9	935.1	649.6
FtcF2_2_51	34.68	F	6	983.8	793.9	458.4	1074.3	889.9	528.5
FtcF2_2_52	40.58	M	33	1139.3	1037.7	939.9	1080.7	975.6	894.5
FtcF2_2_53	35.96	M	26	897.5	864.5	557.9	955.7	926.2	602.9
FtcF2_2_54	32.59	M	6	980.7	842	700.2	1124.1	994	811.2
FtcF2_2_55	36.53	F	33	979.1	950.3	609.1	1022.9	996.7	643
FtcF2_2_56	40.45	M	33.5	1017.3	1033.6	808	962	975	765.2
FtcF2_2_57	38.73	F	34.5	1054	941.5	600.2	1042.2	928.9	591
FtcF2_2_58	34.66	M	33.5	988	918.4	622.2	1079.1	1014.9	692.7
FtcF2_2_59	37.32	M	5.5	926.3	781.3	476.2	950.1	806.5	494.6
FtcF2_2_60	38.88	F	32	931	906.9	695.5	915.4	890.3	683.4
FtcF2_2_61	33.89	M	7	994.3	907.4	605	1104.8	1024.5	690.5
FtcF2_2_62	34.55	M	33	1047.2	1000.1	413.9	1141	1099.6	486.5
FtcF2_2_63	38.58	M	31	1005.3	936.7	670.9	997.2	928.2	664.7
FtcF2_2_64	35.54	M	6.5	1033	865.6	658.9	1101.8	938.5	712.1
FtcF2_2_65	35.03	M	33.5	1002.2	813.8	599.2	1083.9	900.4	662.4
FtcF2_2_66	34	M	6.5	875.5	738.4	482.5	983.2	852.6	565.9
FtcF2_2_67	37.63	M	31.5	1071.2	1069.7	865	1087.2	1086.6	877.4
FtcF2_2_68	34.63	M	26.5	926.8	902.2	555.8	1018.6	999.5	626.8
FtcF2_2_69	33.7	F	25.5	936.7	836.8	581.9	1052	959	671.1
FtcF2_2_70	31.09	M	31	802.8	755.7	403	984.1	947.9	543.3
FtcF2_2_71	33.88	F	32	809.1	883.9	489.3	919.9	1001.3	575
FtcF2_2_72	37.66	F	33.5	980.7	1021	653.1	995.9	1037.1	664.9
FtcF2_2_73	34.67	M	33	915.8	931	670.4	1006.6	1027.2	740.7
FtcF2_3_1	38.7	M	6.5	1050.8	917.4	659.4	1039.7	905.7	650.8
FtcF2_3_2	42.23	F	7	1052.9	978.1	646.8	952.6	871.8	569.2
FtcF2_3_3	41.96	F	32	1076.5	882.8	622.2	983	783.7	549.8
FtcF2_3_4	36.65	M	31.5	982.3	889.6	673	1023	932.8	704.5
FtcF2_3_5	36.79	M	28.5	908	809.6	588.7	945.2	849	617.5
FtcF2_3_6	40.62	F	31.5	1153.9	965.5	714.9	1094.3	902.3	668.8
FtcF2_3_7	44.21	F	32.5	1236.1	1199.4	746.8	1085.7	1040	630.4
FtcF2_3_8	41.52	M	32.5	1121.5	1104.2	716.9	1039.1	1016.9	653.2
FtcF2_3_9	42.49	F	33	1078.6	1140.3	713.8	971.7	1027	631.1
FtcF2_3_10	38.94	F	6.5	969.2	1005.8	707	952	987.6	693.7
FtcF2_3_11	38.47	M	8.5	1184.8	1097.9	667.8	1179.5	1092.3	663.7
FtcF2_3_12	33.96	M	33	904.8	908	517.6	1013.6	1023.3	601.8
FtcF2_3_13	39.62	M	31.5	1046.1	956.6	680.8	1011.8	920.2	654.2
FtcF2_3_14	37.53	F	32	965.5	844.6	603.9	984	864.2	618.2
FtcF2_3_15	45.56	F	32.5	1093.2	1010	696.5	908.7	814.4	553.7
FtcF2_3_16	38.47	F	32	1050.3	964	798.6	1045	958.4	794.5
FtcF2_3_17	33.25	F	22	841.5	804.9	463.1	968.2	939.2	561.1
FtcF2_3_18	36.59	F	33.5	931.5	864	680.8	973.8	908.8	713.5
FtcF2_3_19	33.3	M	8	1130.4	1039.3	623.3	1255.8	1172.2	720.4
FtcF2_3_20	42.98	M	33	1393.1	1180.6	1036.7	1273.8	1054.2	944.4
FtcF2_3_21	34.49	F	5.5	777.1	688.2	449.5	872.5	789.3	523.3
FtcF2_3_22	37.17	M	34	983.3	964.5	514.9	1010.9	993.7	536.3
FtcF2_3_23	43.54	M	32.5	1192.6	1117.3	882.8	1059.1	975.9	779.5
FtcF2_3_24	36.35	M	31.5	866.1	803.8	573	914.4	855	610.4
FtcF2_3_25	39.52	M	33.5	1195.8	1043.5	645.3	1164	1009.8	620.7
FtcF2_3_26	31.03	F	33	NA	767.2	458.4	NA	961	599.9
FtcF2_3_27	43.1	F	33.5	1167.5	1175.9	757.8	1045.2	1046.2	663.1
FtcF2_3_28	36.75	M	33	1102.1	1038.3	740	1140.3	1078.8	769.6
FtcF2_3_29	38.1	F	33	859.3	805.9	584.5	863.4	810.2	587.7
FtcF2_3_31	30.78	M	31.5	916.9	868.2	584	1106.1	1068.7	730.4
FtcF2_3_32	33.75	F	33	873.4	868.7	619.6	987.5	989.6	707.9
FtcF2_3_33	40.77	F	33	877.1	779.2	698.6	813.7	712	649.5
FtcF2_3_34	36.53	M	32.5	957.7	845.2	510.2	1001.5	891.6	544.1
FtcF2_3_35	39.7	F	32.5	1040.4	1060.8	815.3	1004	1022.3	787.2
FtcF2_3_36	34.15	F	31	961.3	796.5	492.4	1065.2	906.7	572.8
FtcF2_3_37	29.48	F	31.5	794.9	743.1	370	1016.9	978.4	541.8
FtcF2_3_38	38.68	M	33	1135.6	948.3	656.2	1125	937.1	648
FtcF2_3_39	35.93	M	32.5	1077.5	1039.3	695	1136.4	1101.8	740.6
FtcF2_3_40	42.26	M	33	1277.4	1138.7	834.2	1176.3	1031.6	756
FtcF2_3_41	42.07	F	32.5	1219.9	1273.2	998	1123.6	1171.1	923.5
FtcF2_3_42	44.72	F	7	1251.8	1141.4	636.9	1088.5	968.3	510.5
FtcF2_3_44	39.77	M	31	1241.8	984.9	800.2	1203.7	944.5	770.7
FtcF2_3_45	34.48	F	8	899.6	832.1	611.2	995.2	933.4	685.2
FtcF2_3_46	38.39	F	32	980.7	983.8	757.2	977.5	980.4	754.7
FtcF2_3_47	36.89	F	33	989.1	910.6	757.8	1023.8	947.4	784.6
FtcF2_3_48	41.7	F	24	1148.7	837.8	589.3	1061.8	745.7	522
FtcF2_3_49	36.08	M	33	1000.6	899.6	438.5	1055.8	958.1	481.2
FtcF2_3_50	38.38	M	32.5	1217.8	1153.9	762.5	1214.8	1150.7	760.2
FtcF2_3_51	43.33	M	33	1112.6	1096.4	723.8	984.5	960.6	624.6
FtcF2_3_52	38.2	F	33.5	NA	NA	NA	NA	NA	NA
FtcF2_3_53	39.51	M	30	NA	NA	NA	NA	NA	NA
FtcF2_3_54	38.83	M	34.5	NA	NA	NA	NA	NA	NA
FtcF2_3_55	38.06	F	32	NA	NA	NA	NA	NA	NA
FtcF2_3_57	43.85	F	7.5	961.9	967.1	737.4	820.6	817.4	628.1
FtcF2_3_60	35.83	M	31.5	1036.2	897	666.2	1097.7	962.2	713.8
FtcF2_3_61	39.04	M	32	1129.8	1090.1	645.8	1110.1	1069.2	630.6
FtcF2_3_62	45.05	F	32.5	1317.7	1220.9	931.5	1146.1	1039	798.7
FtcF2_3_63	37.01	M	34	1082.2	980.2	723.2	1113.8	1013.7	747.7
FtcF2_3_64	38.53	F	6.5	939.4	847.3	693.4	932.6	840.1	688.1
FtcF2_3_65	42.86	F	10	1272.2	1199.4	780.3	1155.9	1076.2	690.3
FtcF2_3_66	41.47	M	33	1324	1067	700.2	1242.9	981	637.4
FtcF2_3_67	35.23	F	26	887.5	811.7	505	964.1	892.9	564.3
FtcF2_3_68	37.1	F	8	1016.3	837.3	570.4	1045.7	868.4	593.1
FtcF2_3_69	42.52	M	6	1137.7	923.1	608.1	1030	809	524.8
FtcF2_3_70	36.4	M	34	1034.1	990.1	701.2	1081.2	1040	737.6
FtcF2_3_71	34.45	M	33.5	811.1	824.8	563.1	907.5	926.9	637.7
FtcF2_3_72	33.97	F	32.5	1021.5	903.2	557.9	1130	1018.2	641.9
FtcF2_4_1	43.83	M	32	1048.2	1050.3	776.6	907.4	901.1	667.7
FtcF2_4_2	46.92	M	32.5	NA	1148.7	573.6	NA	916.7	404.2
FtcF2_4_3	31.55	M	6	733.7	660.4	397.7	903.4	840.2	529
FtcF2_4_4	34.28	F	31.5	964.5	954	585.6	1065.2	1060.7	663.5
FtcF2_4_5	44.03	F	31.5	1000.6	1040.4	598.2	854.8	885.8	485.3
FtcF2_4_6	41.96	F	32	1103.7	1046.1	703.9	1010.2	947	631.5
FtcF2_4_7	36.7	M	31.5	946.7	947.2	637.4	986.2	989	667.9
FtcF2_4_8	44.79	M	29	1225.1	1190	694.4	1060	1015.1	566.7
FtcF2_4_9	48.88	M	32.5	1487.8	1374.8	924.7	1219.3	1090.3	717
FtcF2_4_10	43.99	F	7	973.9	916.3	733.2	829.1	762.8	621.1
FtcF2_4_12	48.64	M	33.5	1314.6	1320.9	1037.2	1052.2	1042.8	834.2
FtcF2_4_13	47.1	F	31.5	1164.9	1155.5	544.8	941.4	918.7	371.9
FtcF2_4_16	46.95	F	32.5	NA	1282.1	971.8	NA	1049.3	801.8
FtcF2_4_17	50.29	F	32.5	1256.5	NA	821.6	952.4	NA	586.3
FtcF2_4_18	45.14	M	33.5	NA	NA	NA	NA	NA	NA
FtcF2_4_20	38.37	M	7.5	NA	NA	NA	NA	NA	NA
FtcF2_4_21	38.66	F	33	NA	NA	NA	NA	NA	NA
FtcF2_4_22	33.21	F	29	NA	NA	NA	NA	NA	NA
FtcF2_4_26	37.9	M	30.5	NA	NA	NA	NA	NA	NA
FtcF2_4_27	46.65	F	33.5	NA	NA	NA	NA	NA	NA
FtcF2_4_28	38.55	M	32.5	NA	NA	NA	NA	NA	NA
FtcF2_4_30	37.78	M	32	NA	NA	NA	NA	NA	NA
FtcF2_4_31	31.21	M	32.5	NA	NA	NA	NA	NA	NA
FtcF2_4_32	32.91	M	27	NA	NA	NA	NA	NA	NA
FtcF2_4_33	41.54	M	33.5	NA	NA	NA	NA	NA	NA
FtcF2_4_34	45.22	F	6.5	NA	NA	NA	NA	NA	NA
FtcF2_4_35	44.14	M	8	NA	NA	NA	NA	NA	NA
FtcF2_4_36	38.48	M	7	NA	NA	NA	NA	NA	NA
FtcF2_4_37	31.81	M	23.5	NA	NA	NA	NA	NA	NA
FtcF2_4_38	34.21	F	6.5	NA	NA	NA	NA	NA	NA
FtcF2_4_39	45.25	F	34	NA	NA	NA	NA	NA	NA
FtcF2_4_40	37.55	M	6.5	NA	NA	NA	NA	NA	NA
FtcF2_4_41	25.71	F	30.5	NA	NA	NA	NA	NA	NA
FtcF2_4_42	34.15	F	34	NA	NA	NA	NA	NA	NA
FtcF2_4_43	28.37	F	6.5	NA	NA	NA	NA	NA	NA
FtcF2_4_44	33.34	F	31.5	NA	NA	NA	NA	NA	NA
FtcF2_4_45	42.82	F	7	NA	NA	NA	NA	NA	NA
FtcF2_4_46	30.68	M	20.5	NA	NA	NA	NA	NA	NA
FtcF2_4_47	30.22	M	8	NA	NA	NA	NA	NA	NA
FtcF2_4_48	39.49	M	6.5	NA	NA	NA	NA	NA	NA
FtcF2_4_49	43.49	F	31	NA	NA	NA	NA	NA	NA
FtcF2_4_50	37.15	F	7.5	NA	NA	NA	NA	NA	NA
FtcF2_4_51	42.19	F	32.5	NA	NA	NA	NA	NA	NA
FtcF2_4_52	43.45	F	33	NA	NA	NA	NA	NA	NA
FtcF2_4_53	47.42	F	34	NA	NA	NA	NA	NA	NA
FtcF2_4_54	39.45	M	32	NA	NA	NA	NA	NA	NA
FtcF2_4_55	42.38	M	31.5	NA	NA	NA	NA	NA	NA
FtcF2_4_56	43.22	F	31.5	NA	NA	NA	NA	NA	NA
FtcF2_4_57	32.61	F	27.5	NA	NA	NA	NA	NA	NA
FtcF2_4_58	34.57	F	7	NA	NA	NA	NA	NA	NA
FtcF2_4_59	40.35	F	30.5	NA	NA	NA	NA	NA	NA
FtcF2_4_61	35.88	M	29	NA	NA	NA	NA	NA	NA
FtcF2_4_62	34.46	M	31.5	NA	NA	NA	NA	NA	NA
FtcF2_4_63	40.93	F	33	NA	NA	NA	NA	NA	NA
FtcF2_4_64	44.55	F	33.5	NA	NA	NA	NA	NA	NA
FtcF2_4_65	28.91	M	24	NA	NA	NA	NA	NA	NA
FtcF2_4_66	32.25	M	6	NA	NA	NA	NA	NA	NA
FtcF2_5_1	41.28	F	32	NA	NA	NA	NA	NA	NA
FtcF2_5_2	35.53	M	24.5	NA	NA	NA	NA	NA	NA
FtcF2_5_3	41.02	M	29.5	NA	NA	NA	NA	NA	NA
FtcF2_5_4	47.85	F	32	NA	NA	NA	NA	NA	NA
FtcF2_5_5	34.37	M	6	NA	NA	NA	NA	NA	NA
FtcF2_5_6	33.37	M	5	NA	NA	NA	NA	NA	NA
FtcF2_5_7	29.78	M	32.5	NA	NA	NA	NA	NA	NA
FtcF2_5_8	39.04	F	33	NA	NA	NA	NA	NA	NA
FtcF2_5_9	42.99	F	33	NA	NA	NA	NA	NA	NA
FtcF2_5_10	36.24	M	7.5	NA	NA	NA	NA	NA	NA
FtcF2_5_11	34.14	M	32.5	NA	NA	NA	NA	NA	NA
FtcF2_5_12	34.18	F	6.5	NA	NA	NA	NA	NA	NA
FtcF2_5_13	32.42	F	31.5	NA	NA	NA	NA	NA	NA
FtcF2_5_14	41.68	M	32	NA	NA	NA	NA	NA	NA
FtcF2_5_16	35.77	F	32.5	NA	NA	NA	NA	NA	NA
FtcF2_5_17	37.87	M	7	NA	NA	NA	NA	NA	NA
FtcF2_5_18	31.57	F	32	NA	NA	NA	NA	NA	NA
FtcF2_5_19	37.72	M	6	NA	NA	NA	NA	NA	NA
FtcF2_5_20	31.67	F	32	NA	NA	NA	NA	NA	NA
FtcF2_5_21	38.92	F	7.5	NA	NA	NA	NA	NA	NA
FtcF2_5_22	37.09	M	32.5	NA	NA	NA	NA	NA	NA
FtcF2_5_23	38.36	M	32	NA	NA	NA	NA	NA	NA
FtcF2_5_24	33.65	M	33	NA	NA	NA	NA	NA	NA
FtcF2_5_25	32.01	M	28.5	NA	NA	NA	NA	NA	NA
FtcF2_5_26	34.05	F	33	NA	NA	NA	NA	NA	NA
FtcF2_5_27	33.38	M	25.5	NA	NA	NA	NA	NA	NA
FtcF2_5_28	38.07	F	33	NA	NA	NA	NA	NA	NA
FtcF2_5_29	32.56	M	28.5	NA	NA	NA	NA	NA	NA
FtcF2_5_31	33.69	F	25	NA	NA	NA	NA	NA	NA
FtcF2_5_32	32.04	F	5.5	NA	NA	NA	NA	NA	NA
FtcF2_5_33	31.5	M	5.5	NA	NA	NA	NA	NA	NA
FtcF2_5_34	34.63	F	33	NA	NA	NA	NA	NA	NA
FtcF2_5_35	32.05	M	32.5	NA	NA	NA	NA	NA	NA
FtcF2_5_36	21.43	F	5.5	NA	NA	NA	NA	NA	NA
FtcF2_5_37	42.62	F	6	NA	NA	NA	NA	NA	NA
FtcF2_5_38	45.5	M	31.5	NA	NA	NA	NA	NA	NA
FtcF2_5_39	46.17	M	7	NA	NA	NA	NA	NA	NA
FtcF2_5_40	41.09	F	33.5	NA	NA	NA	NA	NA	NA
FtcF2_5_41	41.24	F	32.5	NA	NA	NA	NA	NA	NA
FtcF2_5_42	38.74	F	7	NA	NA	NA	NA	NA	NA
FtcF2_5_43	41.88	F	5.5	NA	NA	NA	NA	NA	NA
FtcF2_5_44	32.77	M	6.5	NA	NA	NA	NA	NA	NA
FtcF2_5_45	36.26	M	32	NA	NA	NA	NA	NA	NA
FtcF2_5_46	36.86	M	31.5	NA	NA	NA	NA	NA	NA
FtcF2_5_47	41.19	F	32	NA	NA	NA	NA	NA	NA
FtcF2_5_48	36.88	M	27.5	NA	NA	NA	NA	NA	NA
FtcF2_5_49	34.59	M	31.5	NA	NA	NA	NA	NA	NA
FtcF2_5_50	40.21	M	34.5	NA	NA	NA	NA	NA	NA
FtcF2_5_51	39.9	M	32.5	NA	NA	NA	NA	NA	NA
FtcF2_5_52	40.51	F	32	NA	NA	NA	NA	NA	NA
FtcF2_5_53	41.64	F	32.5	NA	NA	NA	NA	NA	NA
FtcF2_5_54	32.93	M	20	NA	NA	NA	NA	NA	NA
