# Supplementary material for: Genome Assembly Improvement and Mapping Convergently Evolved Skeletal Traits in Sticklebacks with Genotyping-by-Sequencing
Source: G3 (Bethesda). 2015 Jun 3;5(7):1463–72. doi: 10.1534/g3.115.017905 (PMC4502380; doi:10.1534/g3.115.017905)
Supplement: Supporting Information [file supp_g3.115.017905_FileS2.xlsx]

## Sheet: Genetic Map
Chromosome	Marker	Genetic Position	Marker(delete)
1	83_2	0	1Sc1_2
1	83_1	0.127	1Sc1_1
1	186_2	0.317	UnSc82_2
1	92_1	0.534	1Sc2_1
1	92_2	0.861	1Sc2_2
1	97_1	3.649	1Sc3_1
1	97_2	5.317	1Sc3_2
1	175_1	8.626	UnSc72_1
1	175_2	9.392	UnSc72_2
1	165_1	12.132	UnSc64_1
1	165_2	16.492	UnSc64_2
1	30_1	20.946	1Sc4_1
1	30_2	28.649	1Sc4_2
1	30_3	35.712	1Sc4_3
1	30_4	40.21	1Sc4_4
1	30_5	44.06	1Sc4_5
1	30_6	47.952	1Sc4_6
1	30_7	49.246	1Sc4_7
1	30_8	50.816	1Sc4_8
1	30_9	52.323	1Sc4_9
1	7_1	53.006	1Sc5_1
1	7_2	53.275	1Sc5_2
1	7_3	54.189	1Sc5_3
1	7_11	54.748	1Sc5_11
1	7_4	54.823	1Sc5_4
1	7_9	54.925	1Sc5_9
1	7_6	54.929	1Sc5_6
1	7_8	54.988	1Sc5_8
1	7_7	55.096	1Sc5_7
1	7_14	55.316	1Sc5_14
1	7_12	55.382	1Sc5_12
1	7_13	55.464	1Sc5_13
1	7_5	55.533	1Sc5_5
1	7_10	55.672	1Sc5_10
1	7_15	56.224	1Sc5_15
1	7_16	56.749	1Sc5_16
1	7_17	57.952	1Sc5_17
1	7_19	60.279	1Sc5_19
1	7_20	61.861	1Sc5_20
1	7_21	63.038	1Sc5_21
1	7_22	66.081	1Sc5_22
1	7_23	68.273	1Sc5_23
1	7_24	68.746	1Sc5_24
1	7_25	70.996	1Sc5_25
1	7_26	72.132	1Sc5_26
1	7_27	73.784	1Sc5_27
1	119_2	74.498	UnSc30_2
1	22_15	75.08	1Sc6_15
1	22_14	76.528	1Sc6_14
1	22_13	77.96	1Sc6_13
1	22_11	83.122	1Sc6_11
1	22_10	84.361	1Sc6_10
1	22_8	86.662	1Sc6_8
1	22_7	86.979	1Sc6_7
1	22_6	87.767	1Sc6_6
1	22_5	90.814	1Sc6_5
1	22_4	91.186	1Sc6_4
1	22_3	93.626	1Sc6_3
1	22_2	97.881	1Sc6_2
1	22_1	104.942	1Sc6_1
1	74_1	111.638	UnSc12_1
1	74_2	112.776	UnSc12_2
1	82_2	121.099	1Sc8_2
1	82_1	121.52	1Sc8_1
1	123_2	122.766	1Sc7_2
2	98_2	0	UnSc21_2
2	98_1	0.364	UnSc21_1
2	63_2	1.592	2Sc1_2
2	63_1	2.555	2Sc1_1
2	0_1	3.443	2Sc2_1
2	0_2	5.113	2Sc2_2
2	0_3	7.302	2Sc2_3
2	0_4	10.646	2Sc2_4
2	0_5	17.429	2Sc2_5
2	0_6	21.358	2Sc2_6
2	0_7	25.028	2Sc2_7
2	0_8	27.022	2Sc2_8
2	0_9	28.087	2Sc2_9
2	0_10	29.326	2Sc2_10
2	0_11	31.814	2Sc2_11
2	0_12	32.656	2Sc2_12
2	0_14	32.855	2Sc2_14
2	0_13	33.514	2Sc2_13
2	0_15	34.405	2Sc2_15
2	0_16	34.899	2Sc2_16
2	0_17	35.042	2Sc2_17
2	0_18	35.618	2Sc2_18
2	0_19	35.93	2Sc2_19
2	0_20	36.067	2Sc2_20
2	0_21	36.388	2Sc2_21
2	0_23	36.959	2Sc2_23
2	0_22	36.987	2Sc2_22
2	0_24	37.36	2Sc2_24
2	0_25	37.463	2Sc2_25
2	0_26	37.494	2Sc2_26
2	0_28	37.808	2Sc2_28
2	0_27	37.889	2Sc2_27
2	0_29	38.104	2Sc2_29
2	0_30	38.34	2Sc2_30
2	0_31	38.355	2Sc2_31
2	0_32	38.779	2Sc2_32
2	0_33	39.438	2Sc2_33
2	0_34	41.921	2Sc2_34
2	0_35	42.914	2Sc2_35
2	0_36	46.661	2Sc2_36
2	0_37	50.095	2Sc2_37
2	0_38	56.699	2Sc2_38
2	0_39	62.283	2Sc2_39
2	0_40	70.102	2Sc2_40
2	0_41	82.29	2Sc2_41
2	0_42	88.57	2Sc2_42
2	0_43	92.203	2Sc2_43
2	102_1	94.431	2Sc4_1
2	96_1	94.975	2Sc3_1
2	102_2	95.279	2Sc4_2
2	96_2	95.615	2Sc3_2
3	33_1	0	3Sc1_1
3	33_2	2.675	3Sc1_2
3	33_3	7.737	3Sc1_3
3	33_4	14.09	3Sc1_4
3	33_5	18.519	3Sc1_5
3	33_6	21.058	3Sc1_6
3	33_7	22.313	3Sc1_7
3	15_2	22.829	3Sc2_2
3	15_3	24.112	3Sc2_3
3	15_4	25.283	3Sc2_4
3	15_5	25.568	3Sc2_5
3	15_6	25.886	3Sc2_6
3	15_7	26.361	3Sc2_7
3	15_8	26.809	3Sc2_8
3	15_9	27.126	3Sc2_9
3	15_10	28.226	3Sc2_10
3	15_11	28.772	3Sc2_11
3	15_12	29.618	3Sc2_12
3	15_13	30.038	3Sc2_13
3	15_14	30.598	3Sc2_14
3	15_15	31.066	3Sc2_15
3	15_16	31.125	3Sc2_16
3	15_17	32.297	3Sc2_17
3	15_18	32.823	3Sc2_18
3	15_19	34.908	3Sc2_19
3	15_20	35.584	3Sc2_20
3	15_21	37.372	3Sc2_21
3	15_22	41.782	3Sc2_22
3	78_1	44.081	3Sc3_1
3	78_2	46.173	3Sc3_2
3	169_2	52.016	UnSc68_2
3	81_1	53.248	3Sc4_1
3	81_2	57.569	3Sc4_2
3	201_2	61.009	UnSc94_2
3	50_2	63.387	3Sc5_2
3	50_3	68.164	3Sc5_3
3	50_4	76.833	3Sc5_4
3	135_2	80.668	UnSc42_2
3	120_2	81.675	UnSc31_2
3	120_1	82.465	UnSc31_1
3	135_1	86.399	UnSc42_1
4	65_1	0	4Sc1_1
4	65_2	3.05	4Sc1_2
4	65_3	3.622	4Sc1_3
4	222_1	5.993	4Sc2_1
4	20_1	8.639	4Sc3_1
4	20_2	13.057	4Sc3_2
4	20_3	18.502	4Sc3_3
4	20_4	24.516	4Sc3_4
4	20_5	30.159	4Sc3_5
4	20_6	37.976	4Sc3_6
4	20_7	40.246	4Sc3_7
4	20_8	42.266	4Sc3_8
4	20_9	44.078	4Sc3_9
4	20_11	46.299	4Sc3_11
4	20_12	47.138	4Sc3_12
4	20_13	48.086	4Sc3_13
4	20_14	48.219	4Sc3_14
4	20_15	48.582	4Sc3_15
4	20_16	49.337	4Sc3_16
4	17_1	49.488	4Sc4_1
4	17_2	50.35	4Sc4_2
4	17_3	50.548	4Sc4_3
4	17_4	51.048	4Sc4_4
4	17_5	51.775	4Sc4_5
4	17_6	52.431	4Sc4_6
4	17_7	52.556	4Sc4_7
4	17_8	53.084	4Sc4_8
4	17_9	54.135	4Sc4_9
4	17_10	54.838	4Sc4_10
4	17_11	56.138	4Sc4_11
4	17_12	56.969	4Sc4_12
4	17_13	58.547	4Sc4_13
4	17_14	59.408	4Sc4_14
4	17_15	60.478	4Sc4_15
4	17_16	62.146	4Sc4_16
4	17_17	62.79	4Sc4_17
4	17_18	63.146	4Sc4_18
4	24_12	63.775	4Sc6_12
4	24_11	65.58	4Sc6_11
4	24_10	65.814	4Sc6_10
4	24_9	65.955	4Sc6_9
4	24_8	66.256	4Sc6_8
4	24_7	66.471	4Sc6_7
4	24_5	66.676	4Sc6_5
4	24_6	66.742	4Sc6_6
4	24_4	66.941	4Sc6_4
4	28_10	67.28	4Sc5_10
4	24_3	67.281	4Sc6_3
4	24_1	67.315	4Sc6_1
4	108_1	67.433	UnSc25_1
4	24_2	67.505	4Sc6_2
4	28_8	67.761	4Sc5_8
4	28_7	68.248	4Sc5_7
4	28_5	68.546	4Sc5_5
4	28_6	68.546	4Sc5_6
4	28_4	68.98	4Sc5_4
4	28_9	69.221	4Sc5_9
4	28_3	69.588	4Sc5_3
4	28_2	71.056	4Sc5_2
4	42_1	72.779	4Sc7_1
4	42_3	74.895	4Sc7_3
4	42_2	75.106	4Sc7_2
4	42_4	75.959	4Sc7_4
4	42_5	79.795	4Sc7_5
4	41_2	86.419	4Sc8_2
4	41_3	92.858	4Sc8_3
4	41_4	101.163	4Sc8_4
4	121_2	124.282	UnSc32_2
4	121_1	125.9	UnSc32_1
4	152_2	127.396	UnSc53_2
4	152_1	128.24	UnSc53_1
4	90_2	133.046	UnSc18_2
4	90_1	135.406	UnSc18_1
5	54_1	0	UnSc5_1
5	54_2	0.413	UnSc5_2
5	54_3	1.992	UnSc5_3
5	48_1	3.79	UnSc4_1
5	48_2	9.15	UnSc4_2
5	48_3	10.059	UnSc4_3
5	48_4	12.261	UnSc4_4
5	19_15	12.934	5Sc1_15
5	19_14	13.566	5Sc1_14
5	19_13	14.446	5Sc1_13
5	19_12	15.83	5Sc1_12
5	19_11	16.74	5Sc1_11
5	19_10	17.29	5Sc1_10
5	19_9	17.467	5Sc1_9
5	19_8	18.865	5Sc1_8
5	19_7	20.17	5Sc1_7
5	19_6	20.76	5Sc1_6
5	19_5	22.047	5Sc1_5
5	19_4	22.349	5Sc1_4
5	19_3	22.507	5Sc1_3
5	19_2	24.083	5Sc1_2
5	19_1	25.302	5Sc1_1
5	38_1	28.98	5Sc2_1
5	38_2	31.506	5Sc2_2
5	38_3	34.672	5Sc2_3
5	38_4	36.443	5Sc2_4
5	38_5	40.423	5Sc2_5
5	38_6	50.036	5Sc2_6
5	93_2	54.34	5Sc3_2
5	93_1	57.027	5Sc3_1
5	73_2	65.3	5Sc4_2
5	73_1	70.891	5Sc4_1
5	112_2	74.535	UnSc27_2
5	112_1	75.97	UnSc27_1
5	142_1	76.491	5Sc5_1
5	125_2	76.548	5Sc6_2
5	142_2	76.963	5Sc5_2
5	125_1	77.562	5Sc6_1
6	61_2	0	UnSc8_2
6	61_1	3.784	UnSc8_1
6	66_2	6.842	6Sc1_2
6	66_1	10.929	6Sc1_1
6	35_7	12.268	6Sc2_7
6	35_6	13.329	6Sc2_6
6	35_5	14.675	6Sc2_5
6	35_4	17.606	6Sc2_4
6	35_3	18.844	6Sc2_3
6	35_2	20.128	6Sc2_2
6	35_1	21.772	6Sc2_1
6	13_1	23.262	6Sc3_1
6	13_2	24.753	6Sc3_2
6	13_4	25.777	6Sc3_4
6	13_3	25.857	6Sc3_3
6	13_5	26.388	6Sc3_5
6	13_6	27.056	6Sc3_6
6	13_7	27.267	6Sc3_7
6	13_8	28.015	6Sc3_8
6	13_9	28.496	6Sc3_9
6	13_10	28.948	6Sc3_10
6	13_11	29.5	6Sc3_11
6	13_12	29.841	6Sc3_12
6	13_13	30.338	6Sc3_13
6	13_14	30.873	6Sc3_14
6	13_15	31.91	6Sc3_15
6	13_16	32.936	6Sc3_16
6	13_17	33.451	6Sc3_17
6	13_18	35.131	6Sc3_18
6	13_19	36.478	6Sc3_19
6	13_20	40.628	6Sc3_20
6	13_21	43.001	6Sc3_21
6	13_22	47.847	6Sc3_22
6	13_23	55.023	6Sc3_23
6	13_24	64.145	6Sc3_24
6	13_25	74.385	6Sc3_25
6	140_2	81.14	6Sc4_2
6	117_1	82.245	6Sc5_1
6	117_2	83.032	6Sc5_2
6	156_2	83.738	UnSc56_2
7	129_2	0	UnSc36_2
7	129_1	1.074	UnSc36_1
7	131_1	8.765	UnSc38_1
7	131_2	9.561	UnSc38_2
7	86_2	11.54	7Sc1_2
7	86_1	13.268	7Sc1_1
7	118_1	15.403	7Sc2_1
7	118_2	18.179	7Sc2_2
7	55_2	32.568	7Sc3_2
7	55_3	35.386	7Sc3_3
7	39_1	37.091	7Sc4_1
7	39_2	43.023	7Sc4_2
7	39_4	59.147	7Sc4_4
7	39_5	61.847	7Sc4_5
7	23_1	63.699	7Sc5_1
7	23_2	65.47	7Sc5_2
7	23_3	66.086	7Sc5_3
7	23_4	66.425	7Sc5_4
7	23_5	66.54	7Sc5_5
7	23_6	66.886	7Sc5_6
7	23_7	67.281	7Sc5_7
7	23_8	67.754	7Sc5_8
7	23_10	68.561	7Sc5_10
7	23_9	68.565	7Sc5_9
7	23_11	69.07	7Sc5_11
7	106_1	69.214	UnSc24_1
7	23_12	69.345	7Sc5_12
7	47_4	69.399	UnSc3_4
7	47_1	69.501	UnSc3_1
7	47_3	69.675	UnSc3_3
7	47_2	69.693	UnSc3_2
7	1_1	69.719	7Sc6_1
7	106_2	69.83	UnSc24_2
7	1_4	70.926	7Sc6_4
7	1_5	71.396	7Sc6_5
7	1_6	71.557	7Sc6_6
7	1_7	71.57	7Sc6_7
7	1_8	71.879	7Sc6_8
7	1_10	72.034	7Sc6_10
7	1_9	72.034	7Sc6_9
7	1_11	72.342	7Sc6_11
7	1_12	72.663	7Sc6_12
7	1_14	73.45	7Sc6_14
7	1_15	73.595	7Sc6_15
7	1_13	73.729	7Sc6_13
7	1_16	73.814	7Sc6_16
7	1_17	74.134	7Sc6_17
7	1_18	74.775	7Sc6_18
7	1_19	75.087	7Sc6_19
7	1_20	75.244	7Sc6_20
7	1_21	75.824	7Sc6_21
7	1_22	76.075	7Sc6_22
7	1_24	76.457	7Sc6_24
7	1_23	76.658	7Sc6_23
7	1_25	77.075	7Sc6_25
7	1_26	78.34	7Sc6_26
7	1_27	80.332	7Sc6_27
7	1_28	82.188	7Sc6_28
7	1_29	85.807	7Sc6_29
7	1_30	89.757	7Sc6_30
7	1_31	95.386	7Sc6_31
7	1_32	101.812	7Sc6_32
7	1_33	113.118	7Sc6_33
7	1_34	122.123	7Sc6_34
7	113_2	129.787	7Sc7_2
7	132_1	130.905	UnSc39_1
8	56_3	0	UnSc6_3
8	56_2	0.335	UnSc6_2
8	53_1	2.445	8Sc1_1
8	53_2	4.209	8Sc1_2
8	53_3	6.473	8Sc1_3
8	36_1	7.43	8Sc2_1
8	36_2	10.19	8Sc2_2
8	36_3	13.985	8Sc2_3
8	36_4	17.631	8Sc2_4
8	36_5	22.915	8Sc2_5
8	36_6	26.253	8Sc2_6
8	36_7	28.518	8Sc2_7
8	9_1	30.007	8Sc3_1
8	9_2	30.843	8Sc3_2
8	9_3	32.486	8Sc3_3
8	9_4	34.105	8Sc3_4
8	9_5	35.188	8Sc3_5
8	9_6	35.657	8Sc3_6
8	9_7	36.929	8Sc3_7
8	9_9	37.357	8Sc3_9
8	9_8	37.444	8Sc3_8
8	9_10	38.083	8Sc3_10
8	9_11	38.409	8Sc3_11
8	9_12	38.643	8Sc3_12
8	9_13	39.294	8Sc3_13
8	9_14	39.493	8Sc3_14
8	9_15	39.641	8Sc3_15
8	9_17	39.964	8Sc3_17
8	9_16	40.128	8Sc3_16
8	9_18	40.612	8Sc3_18
8	9_19	41.394	8Sc3_19
8	9_20	42.462	8Sc3_20
8	9_21	43.734	8Sc3_21
8	9_22	44.91	8Sc3_22
8	9_23	47.749	8Sc3_23
8	9_24	51.739	8Sc3_24
8	9_25	58.774	8Sc3_25
8	9_26	67.518	8Sc3_26
8	9_27	72.432	8Sc3_27
8	9_28	77.238	8Sc3_28
8	71_1	83.858	8Sc4_1
8	71_2	86.932	8Sc4_2
8	138_2	89.244	8Sc6_2
8	138_1	89.349	8Sc6_1
8	153_2	89.733	8Sc5_2
8	153_1	90.977	8Sc5_1
9	31_1	0	9Sc1_1
9	31_2	1.424	9Sc1_2
9	31_3	5.553	9Sc1_3
9	31_4	12.217	9Sc1_4
9	31_5	27.264	9Sc1_5
9	31_6	32.751	9Sc1_6
9	31_7	34.09	9Sc1_7
9	31_9	35.162	9Sc1_9
9	8_28	35.224	9Sc2_28
9	8_27	35.259	9Sc2_27
9	31_8	35.434	9Sc1_8
9	8_26	35.925	9Sc2_26
9	8_25	36.307	9Sc2_25
9	8_24	37.455	9Sc2_24
9	8_23	38.046	9Sc2_23
9	8_22	38.359	9Sc2_22
9	8_21	38.885	9Sc2_21
9	8_20	40.003	9Sc2_20
9	8_19	40.38	9Sc2_19
9	8_18	40.509	9Sc2_18
9	8_17	41.588	9Sc2_17
9	8_16	41.808	9Sc2_16
9	8_15	42.195	9Sc2_15
9	8_14	42.486	9Sc2_14
9	8_13	43.316	9Sc2_13
9	8_12	44.038	9Sc2_12
9	8_11	44.431	9Sc2_11
9	8_10	44.572	9Sc2_10
9	8_9	44.884	9Sc2_9
9	8_8	46.084	9Sc2_8
9	8_7	47.659	9Sc2_7
9	8_6	48.567	9Sc2_6
9	8_5	51.069	9Sc2_5
9	8_4	52.489	9Sc2_4
9	8_3	57.514	9Sc2_3
9	8_2	60.243	9Sc2_2
9	8_1	70.039	9Sc2_1
9	77_1	72.746	9Sc3_1
9	77_2	76.583	9Sc3_2
9	91_2	79.209	9Sc4_2
9	91_1	81.786	9Sc4_1
9	105_1	85.077	9Sc5_1
9	105_2	86.853	9Sc5_2
9	183_2	88.933	9Sc6_2
9	183_1	90	9Sc6_1
9	189_1	92.653	9Sc8_1
9	198_2	94.669	UnSc91_2
9	177_1	96.791	UnSc74_1
9	177_2	98.771	UnSc74_2
9	87_1	100.018	9Sc9_1
9	244_1	100.323	UnSc136_1
9	189_2	101.221	9Sc8_2
9	87_2	103.191	9Sc9_2
10	111_1	0	UnSc26_1
10	111_2	0.77	UnSc26_2
10	130_2	1.389	UnSc37_2
10	130_1	1.82	UnSc37_1
10	58_2	3.537	UnSc7_2
10	5_1	6.091	10Sc1_1
10	5_3	12.223	10Sc1_3
10	5_4	13.816	10Sc1_4
10	5_5	18.489	10Sc1_5
10	5_6	21.031	10Sc1_6
10	5_7	22.845	10Sc1_7
10	5_8	23.876	10Sc1_8
10	5_9	26.885	10Sc1_9
10	5_10	27.73	10Sc1_10
10	5_11	29.9	10Sc1_11
10	5_12	30.397	10Sc1_12
10	5_13	30.988	10Sc1_13
10	5_14	31.159	10Sc1_14
10	5_15	31.994	10Sc1_15
10	5_16	32.827	10Sc1_16
10	5_17	33.76	10Sc1_17
10	5_18	34.404	10Sc1_18
10	5_19	34.954	10Sc1_19
10	5_20	35.331	10Sc1_20
10	5_21	35.659	10Sc1_21
10	5_22	36.564	10Sc1_22
10	5_23	38.421	10Sc1_23
10	5_24	39.44	10Sc1_24
10	5_25	42.695	10Sc1_25
10	5_26	47.352	10Sc1_26
10	5_27	54.723	10Sc1_27
10	5_28	62.66	10Sc1_28
10	5_29	73.24	10Sc1_29
10	59_2	83.017	10Sc2_2
10	5_30	83.895	10Sc1_30
10	149_1	84.132	UnSc50_1
10	149_2	84.178	UnSc50_2
10	59_1	84.29	10Sc2_1
10	208_2	84.353	UnSc101_2
10	208_1	85.083	UnSc101_1
10	59_3	85.737	10Sc2_3
11	80_1	0	UnSc14_1
11	80_2	0.827	UnSc14_2
11	75_2	1.68	11Sc1_2
11	75_1	2.447	11Sc1_1
11	49_4	3.016	11Sc2_4
11	49_3	4.846	11Sc2_3
11	49_2	5.276	11Sc2_2
11	49_1	6.776	11Sc2_1
11	11_1	8.602	11Sc3_1
11	11_2	12.823	11Sc3_2
11	11_3	14.27	11Sc3_3
11	11_4	16.692	11Sc3_4
11	11_5	17.784	11Sc3_5
11	11_6	19.347	11Sc3_6
11	11_7	20.699	11Sc3_7
11	11_8	20.721	11Sc3_8
11	11_9	22.043	11Sc3_9
11	11_10	23.374	11Sc3_10
11	11_11	24.383	11Sc3_11
11	11_12	24.88	11Sc3_12
11	11_13	25.803	11Sc3_13
11	11_14	26.389	11Sc3_14
11	11_15	27.172	11Sc3_15
11	11_16	27.802	11Sc3_16
11	11_17	28.334	11Sc3_17
11	11_18	30.145	11Sc3_18
11	11_19	30.393	11Sc3_19
11	11_20	31.291	11Sc3_20
11	11_21	32.127	11Sc3_21
11	11_22	33.832	11Sc3_22
11	11_23	36.856	11Sc3_23
11	11_24	40.002	11Sc3_24
11	11_25	50.312	11Sc3_25
11	11_26	57.848	11Sc3_26
11	151_1	63.519	UnSc52_1
11	151_2	65.276	UnSc52_2
11	79_2	67.099	11Sc4_2
11	79_1	70.295	11Sc4_1
11	103_1	78.588	11Sc5_1
11	100_2	81.074	11Sc6_2
11	100_1	82.232	11Sc6_1
11	190_1	84.054	11Sc7_1
12	114_2	0	UnSc28_2
12	139_2	0.875	UnSc44_2
12	114_1	1.059	UnSc28_1
12	139_1	1.734	UnSc44_1
12	195_2	2.98	UnSc88_2
12	180_1	5.671	UnSc77_1
12	158_2	10.433	12Sc1_2
12	62_1	19.936	12Sc2_1
12	62_2	29.406	12Sc2_2
12	62_3	33.133	12Sc2_3
12	99_2	37.647	UnSc22_2
12	99_1	40.082	UnSc22_1
12	68_1	45.562	UnSc10_1
12	68_2	47.771	UnSc10_2
12	64_1	49.181	12Sc3_1
12	64_2	50.605	12Sc3_2
12	6_29	52.371	12Sc4_29
12	6_28	53.139	12Sc4_28
12	6_27	54.061	12Sc4_27
12	6_26	54.864	12Sc4_26
12	6_25	55.62	12Sc4_25
12	6_24	56.085	12Sc4_24
12	6_22	56.49	12Sc4_22
12	6_23	56.497	12Sc4_23
12	6_21	56.668	12Sc4_21
12	6_20	57.289	12Sc4_20
12	6_19	57.78	12Sc4_19
12	6_18	58.288	12Sc4_18
12	6_17	58.487	12Sc4_17
12	6_16	58.594	12Sc4_16
12	6_14	59.838	12Sc4_14
12	6_13	60.207	12Sc4_13
12	6_12	61.356	12Sc4_12
12	6_11	62.174	12Sc4_11
12	6_10	63.221	12Sc4_10
12	6_9	64.862	12Sc4_9
12	6_8	65.998	12Sc4_8
12	6_7	67.75	12Sc4_7
12	6_6	72.074	12Sc4_6
12	6_5	74.415	12Sc4_5
12	6_4	75.706	12Sc4_4
12	6_3	77.426	12Sc4_3
12	6_2	79.192	12Sc4_2
12	70_2	80	12Sc5_2
12	70_1	81.34	12Sc5_1
12	60_3	84.08	12Sc6_3
12	60_2	86.98	12Sc6_2
12	60_1	88.509	12Sc6_1
12	148_1	91.557	UnSc49_1
12	148_2	94.285	UnSc49_2
13	51_3	0	13Sc1_3
13	51_2	1.729	13Sc1_2
13	51_1	4.309	13Sc1_1
13	52_1	4.876	13Sc2_1
13	52_2	7.409	13Sc2_2
13	52_3	10.28	13Sc2_3
13	4_1	12.484	13Sc3_1
13	4_2	14.49	13Sc3_2
13	4_3	17.43	13Sc3_3
13	4_4	18.44	13Sc3_4
13	4_5	20.223	13Sc3_5
13	4_6	21.033	13Sc3_6
13	4_8	23.834	13Sc3_8
13	4_10	24.195	13Sc3_10
13	4_9	24.254	13Sc3_9
13	4_11	25.725	13Sc3_11
13	4_12	26.634	13Sc3_12
13	4_13	27.206	13Sc3_13
13	4_14	27.719	13Sc3_14
13	4_15	28.144	13Sc3_15
13	4_16	28.886	13Sc3_16
13	4_17	29.251	13Sc3_17
13	4_19	29.637	13Sc3_19
13	4_18	29.729	13Sc3_18
13	4_20	30.088	13Sc3_20
13	4_21	30.245	13Sc3_21
13	4_22	30.738	13Sc3_22
13	4_23	31.444	13Sc3_23
13	4_24	32.232	13Sc3_24
13	4_25	33.156	13Sc3_25
13	4_26	33.886	13Sc3_26
13	4_27	35.643	13Sc3_27
13	4_28	37.385	13Sc3_28
13	4_29	40.442	13Sc3_29
13	4_30	42.314	13Sc3_30
13	4_31	46.149	13Sc3_31
13	4_32	54.463	13Sc3_32
13	57_3	60.924	13Sc4_3
13	57_2	65.896	13Sc4_2
13	57_1	69.577	13Sc4_1
13	107_2	76.151	13Sc5_2
13	107_1	79.018	13Sc5_1
13	200_1	79.564	UnSc93_1
13	150_2	80.015	UnSc51_2
13	150_1	80.434	UnSc51_1
13	133_2	81.07	UnSc40_2
14	176_2	0	UnSc73_2
14	116_2	1.359	14Sc1_2
14	116_1	2.041	14Sc1_1
14	197_2	2.398	UnSc90_2
14	168_2	3.132	UnSc67_2
14	168_1	3.67	UnSc67_1
14	12_1	5.629	14Sc2_1
14	12_2	12.391	14Sc2_2
14	12_3	19.306	14Sc2_3
14	12_4	27.364	14Sc2_4
14	12_5	33.164	14Sc2_5
14	12_6	38.084	14Sc2_6
14	12_7	42.51	14Sc2_7
14	12_8	44.386	14Sc2_8
14	12_10	47.64	14Sc2_10
14	12_11	49.303	14Sc2_11
14	12_12	49.798	14Sc2_12
14	12_13	51.477	14Sc2_13
14	12_14	52.21	14Sc2_14
14	12_15	52.738	14Sc2_15
14	12_16	53.506	14Sc2_16
14	12_17	54.127	14Sc2_17
14	12_18	55.727	14Sc2_18
14	12_19	56.435	14Sc2_19
14	12_20	57.271	14Sc2_20
14	12_21	58.398	14Sc2_21
14	12_22	60.138	14Sc2_22
14	12_23	61.489	14Sc2_23
14	12_24	62.58	14Sc2_24
14	40_4	64.568	14Sc3_4
14	40_5	64.973	14Sc3_5
14	40_3	67.128	14Sc3_3
14	40_2	68.887	14Sc3_2
14	88_2	72.179	UnSc16_2
14	88_1	72.989	UnSc16_1
15	110_2	0	15Sc1_2
15	110_1	3.591	15Sc1_1
15	159_1	5.008	UnSc58_1
15	159_2	5.324	UnSc58_2
15	184_2	6.15	UnSc80_2
15	184_1	6.484	UnSc80_1
15	72_2	8.964	15Sc2_2
15	72_1	12.509	15Sc2_1
15	10_1	18.455	15Sc3_1
15	10_2	25.956	15Sc3_2
15	10_3	36.144	15Sc3_3
15	10_4	41.99	15Sc3_4
15	10_5	44.89	15Sc3_5
15	10_7	50.193	15Sc3_7
15	10_9	51.61	15Sc3_9
15	10_10	52.085	15Sc3_10
15	10_11	52.567	15Sc3_11
15	10_12	53.35	15Sc3_12
15	10_13	53.932	15Sc3_13
15	10_14	54.242	15Sc3_14
15	10_15	55.377	15Sc3_15
15	10_16	56.112	15Sc3_16
15	10_17	56.975	15Sc3_17
15	10_18	58.208	15Sc3_18
15	10_19	60.143	15Sc3_19
15	10_20	61.483	15Sc3_20
15	10_21	63.331	15Sc3_21
15	10_22	64.192	15Sc3_22
15	10_23	66.735	15Sc3_23
15	10_24	68.644	15Sc3_24
15	10_25	69.009	15Sc3_25
15	45_4	70.279	15Sc4_4
15	10_26	71.106	15Sc3_26
15	45_3	73.596	15Sc4_3
15	45_2	77.507	15Sc4_2
15	45_1	80.367	15Sc4_1
15	84_1	81.693	UnSc15_1
15	84_2	82.687	UnSc15_2
16	26_1	0	16Sc1_1
16	26_2	1.315	16Sc1_2
16	26_3	1.958	16Sc1_3
16	26_4	4.472	16Sc1_4
16	26_5	5.92	16Sc1_5
16	26_6	9.529	16Sc1_6
16	26_7	16.151	16Sc1_7
16	26_8	20.59	16Sc1_8
16	26_9	22.329	16Sc1_9
16	26_10	24.39	16Sc1_10
16	26_11	25.228	16Sc1_11
16	14_1	26.883	16Sc2_1
16	14_2	28.748	16Sc2_2
16	14_3	29.501	16Sc2_3
16	14_4	30.77	16Sc2_4
16	14_5	31.625	16Sc2_5
16	14_6	32.203	16Sc2_6
16	14_7	32.86	16Sc2_7
16	14_8	33.551	16Sc2_8
16	14_9	34.333	16Sc2_9
16	14_10	34.733	16Sc2_10
16	14_11	35.005	16Sc2_11
16	14_12	35.008	16Sc2_12
16	14_13	35.455	16Sc2_13
16	14_14	35.833	16Sc2_14
16	14_15	36.478	16Sc2_15
16	14_16	36.79	16Sc2_16
16	14_17	37.769	16Sc2_17
16	14_18	39.33	16Sc2_18
16	14_19	40.688	16Sc2_19
16	14_20	42.684	16Sc2_20
16	14_21	46.764	16Sc2_21
16	14_22	51.301	16Sc2_22
16	44_4	58.73	16Sc3_4
16	44_3	72.418	16Sc3_3
16	44_1	78.259	16Sc3_1
16	44_2	78.264	16Sc3_2
16	115_2	83.992	UnSc29_2
16	115_1	85.264	UnSc29_1
16	202_2	86.467	UnSc95_2
16	202_1	87.395	UnSc95_1
16	181_1	87.813	UnSc78_1
16	69_1	89.42	UnSc11_1
16	69_2	89.586	UnSc11_2
17	89_2	0	UnSc17_2
17	109_2	1.764	17Sc1_2
17	109_1	2.963	17Sc1_1
17	136_1	5.035	17Sc2_1
17	191_2	5.673	17Sc3_2
17	174_2	9.872	17Sc4_2
17	25_2	17.685	17Sc5_2
17	25_3	23.128	17Sc5_3
17	25_4	35.496	17Sc5_4
17	25_5	39.567	17Sc5_5
17	25_6	43.401	17Sc5_6
17	25_7	46.77	17Sc5_7
17	25_8	48.57	17Sc5_8
17	25_9	49.717	17Sc5_9
17	25_10	51.379	17Sc5_10
17	25_11	51.838	17Sc5_11
17	27_11	52.699	UnSc1_11
17	25_12	52.789	17Sc5_12
17	27_9	52.833	UnSc1_9
17	27_10	53.1	UnSc1_10
17	27_8	53.145	UnSc1_8
17	27_5	53.469	UnSc1_5
17	27_2	53.571	UnSc1_2
17	18_1	53.641	17Sc6_1
17	27_3	53.694	UnSc1_3
17	27_6	53.703	UnSc1_6
17	27_7	53.736	UnSc1_7
17	27_4	53.753	UnSc1_4
17	18_3	53.812	17Sc6_3
17	18_2	53.957	17Sc6_2
17	18_5	54.256	17Sc6_5
17	18_4	54.38	17Sc6_4
17	18_6	54.877	17Sc6_6
17	18_7	56.063	17Sc6_7
17	18_8	57.249	17Sc6_8
17	18_9	59.381	17Sc6_9
17	18_10	62.629	17Sc6_10
17	18_11	67.839	17Sc6_11
17	18_12	72.683	17Sc6_12
17	18_13	86.864	17Sc6_13
17	18_14	95.453	17Sc6_14
17	18_15	98.691	17Sc6_15
17	18_16	101.114	17Sc6_16
17	18_17	101.84	17Sc6_17
18	29_1	0	18Sc1_1
18	29_2	0.149	18Sc1_2
18	29_3	2.588	18Sc1_3
18	29_4	6.195	18Sc1_4
18	29_5	14.468	18Sc1_5
18	29_6	19.434	18Sc1_6
18	29_7	24.637	18Sc1_7
18	29_8	27.48	18Sc1_8
18	21_1	28.249	18Sc2_1
18	21_2	28.363	18Sc2_2
18	29_10	28.405	18Sc1_10
18	29_9	28.456	18Sc1_9
18	21_3	28.504	18Sc2_3
18	21_4	28.857	18Sc2_4
18	21_5	29.484	18Sc2_5
18	21_6	30.49	18Sc2_6
18	21_7	31.516	18Sc2_7
18	21_8	31.844	18Sc2_8
18	21_9	32.434	18Sc2_9
18	21_10	33.526	18Sc2_10
18	21_11	35.498	18Sc2_11
18	21_12	36.869	18Sc2_12
18	21_13	38.712	18Sc2_13
18	21_14	40.341	18Sc2_14
18	21_15	43.001	18Sc2_15
18	32_1	44.455	18Sc3_1
18	32_2	46.156	18Sc3_2
18	32_3	48.084	18Sc3_3
18	32_4	54.471	18Sc3_4
18	32_5	61.456	18Sc3_5
18	32_6	68.429	18Sc3_6
18	32_7	76.568	18Sc3_7
18	32_8	81.308	18Sc3_8
19	85_1	0	19Sc1_1
19	85_2	0.799	19Sc1_2
19	163_2	3.314	UnSc62_2
19	163_1	5.248	UnSc62_1
19	34_1	11.732	19Sc2_1
19	34_2	19.134	19Sc2_2
19	34_3	31.597	19Sc2_3
19	34_4	45.748	19Sc2_4
19	224_2	47.935	UnSc116_2
19	34_5	53.375	19Sc2_5
19	34_7	54.763	19Sc2_7
19	3_33	55.169	19Sc3_33
19	3_31	55.228	19Sc3_31
19	34_6	55.352	19Sc2_6
19	3_32	55.455	19Sc3_32
19	3_30	56.04	19Sc3_30
19	3_29	56.85	19Sc3_29
19	3_28	57.294	19Sc3_28
19	3_27	58.44	19Sc3_27
19	3_26	58.637	19Sc3_26
19	3_23	59.668	19Sc3_23
19	3_24	59.697	19Sc3_24
19	3_25	59.705	19Sc3_25
19	3_22	59.767	19Sc3_22
19	3_21	59.915	19Sc3_21
19	3_19	60.098	19Sc3_19
19	3_20	60.136	19Sc3_20
19	3_18	60.526	19Sc3_18
19	3_17	61.188	19Sc3_17
19	3_16	61.391	19Sc3_16
19	3_13	61.484	19Sc3_13
19	3_15	61.534	19Sc3_15
19	3_11	61.588	19Sc3_11
19	3_12	61.702	19Sc3_12
19	3_14	61.735	19Sc3_14
19	3_10	62.001	19Sc3_10
19	3_9	62.062	19Sc3_9
19	3_8	63.819	19Sc3_8
19	3_7	65.351	19Sc3_7
19	3_6	68.596	19Sc3_6
19	3_5	72.017	19Sc3_5
19	3_4	77.544	19Sc3_4
19	3_3	85.551	19Sc3_3
19	3_2	88.402	19Sc3_2
19	3_1	89.505	19Sc3_1
20	137_1	0	UnSc43_1
20	157_1	1.114	UnSc57_1
20	104_1	5.227	20Sc1_1
20	157_2	5.488	UnSc57_2
20	170_1	5.71	20Sc2_1
20	170_2	5.798	20Sc2_2
20	104_2	6.005	20Sc1_2
20	137_2	7.012	UnSc43_2
20	122_1	9.253	UnSc33_1
20	122_2	13.262	UnSc33_2
20	143_2	21.069	20Sc3_2
20	2_35	29.359	20Sc4_35
20	2_34	37.576	20Sc4_34
20	2_33	47.113	20Sc4_33
20	2_32	51.755	20Sc4_32
20	2_31	56.427	20Sc4_31
20	2_30	58.898	20Sc4_30
20	2_29	60.305	20Sc4_29
20	2_28	61.205	20Sc4_28
20	2_27	61.803	20Sc4_27
20	2_26	62.116	20Sc4_26
20	2_25	62.741	20Sc4_25
20	2_24	62.889	20Sc4_24
20	2_22	63.355	20Sc4_22
20	2_23	63.364	20Sc4_23
20	2_21	63.825	20Sc4_21
20	2_20	64.254	20Sc4_20
20	2_19	64.426	20Sc4_19
20	2_17	64.731	20Sc4_17
20	2_18	64.815	20Sc4_18
20	2_16	64.904	20Sc4_16
20	2_15	65.21	20Sc4_15
20	2_14	65.744	20Sc4_14
20	2_13	66.124	20Sc4_13
20	2_12	66.901	20Sc4_12
20	2_11	67.084	20Sc4_11
20	2_10	67.939	20Sc4_10
20	2_9	68.274	20Sc4_9
20	2_8	70.409	20Sc4_8
20	2_7	74.039	20Sc4_7
20	2_6	78.6	20Sc4_6
20	2_5	81.164	20Sc4_5
20	2_4	85.756	20Sc4_4
20	2_3	88.384	20Sc4_3
20	2_2	90.634	20Sc4_2
20	2_1	91.57	20Sc4_1
20	46_1	92.105	20Sc5_1
20	46_2	93.077	20Sc5_2
20	46_3	94.208	20Sc5_3
20	46_4	94.582	20Sc5_4
21	95_1	0	UnSc20_1
21	134_1	1.936	UnSc41_1
21	144_2	2.699	21Sc1_2
21	37_1	10.126	UnSc2_1
21	37_2	10.226	UnSc2_2
21	37_3	11.186	UnSc2_3
21	37_4	11.47	UnSc2_4
21	37_5	12.501	UnSc2_5
21	37_6	12.629	UnSc2_6
21	16_4	12.964	21Sc2_4
21	16_3	13.056	21Sc2_3
21	16_5	13.364	21Sc2_5
21	16_6	14.466	21Sc2_6
21	16_7	14.524	21Sc2_7
21	16_8	14.744	21Sc2_8
21	16_9	15.658	21Sc2_9
21	16_10	16.077	21Sc2_10
21	16_11	17.416	21Sc2_11
21	16_12	17.86	21Sc2_12
21	16_13	17.86	21Sc2_13
21	16_14	17.873	21Sc2_14
21	16_15	17.913	21Sc2_15
21	16_16	18.057	21Sc2_16
21	16_17	18.942	21Sc2_17
21	16_18	22.483	21Sc2_18
21	16_19	28.154	21Sc2_19
21	43_1	31.597	21Sc3_1
21	43_2	36.463	21Sc3_2
21	43_3	41.232	21Sc3_3
21	43_4	47.156	21Sc3_4
21	67_2	65.971	UnSc9_2
21	127_2	73.745	21Sc4_2
21	126_2	76.26	UnSc34_2
21	146_2	77.367	UnSc47_2
21	146_1	77.647	UnSc47_1
21	182_2	78.221	UnSc79_2
21	182_1	79.072	UnSc79_1
			id
			1Sc1_2
			1Sc1_1
			UnSc82_2
			1Sc2_1
			1Sc2_2
			1Sc3_1
			1Sc3_2
			UnSc72_1
			UnSc72_2
			UnSc64_1
			UnSc64_2
			1Sc4_1
			1Sc4_2
			1Sc4_3
			1Sc4_4
			1Sc4_5
			1Sc4_6
			1Sc4_7
			1Sc4_8
			1Sc4_9
			1Sc5_1
			1Sc5_2
			1Sc5_3
			1Sc5_11
			1Sc5_4
			1Sc5_9
			1Sc5_6
			1Sc5_8
			1Sc5_7
			1Sc5_14
			1Sc5_12
			1Sc5_13
			1Sc5_5
			1Sc5_10
			1Sc5_15
			1Sc5_16
			1Sc5_17
			1Sc5_19
			1Sc5_20
			1Sc5_21
			1Sc5_22
			1Sc5_23
			1Sc5_24
			1Sc5_25
			1Sc5_26
			1Sc5_27
			UnSc30_2
			1Sc6_15
			1Sc6_14
			1Sc6_13
			1Sc6_11
			1Sc6_10
			1Sc6_8
			1Sc6_7
			1Sc6_6
			1Sc6_5
			1Sc6_4
			1Sc6_3
			1Sc6_2
			1Sc6_1
			UnSc12_1
			UnSc12_2
			1Sc8_2
			1Sc8_1
			1Sc7_2
			UnSc21_2
			UnSc21_1
			2Sc1_2
			2Sc1_1
			2Sc2_1
			2Sc2_2
			2Sc2_3
			2Sc2_4
			2Sc2_5
			2Sc2_6
			2Sc2_7
			2Sc2_8
			2Sc2_9
			2Sc2_10
			2Sc2_11
			2Sc2_12
			2Sc2_14
			2Sc2_13
			2Sc2_15
			2Sc2_16
			2Sc2_17
			2Sc2_18
			2Sc2_19
			2Sc2_20
			2Sc2_21
			2Sc2_23
			2Sc2_22
			2Sc2_24
			2Sc2_25
			2Sc2_26
			2Sc2_28
			2Sc2_27
			2Sc2_29
			2Sc2_30
			2Sc2_31
			2Sc2_32
			2Sc2_33
			2Sc2_34
			2Sc2_35
			2Sc2_36
			2Sc2_37
			2Sc2_38
			2Sc2_39
			2Sc2_40
			2Sc2_41
			2Sc2_42
			2Sc2_43
			2Sc4_1
			2Sc3_1
			2Sc4_2
			2Sc3_2
			3Sc1_1
			3Sc1_2
			3Sc1_3
			3Sc1_4
			3Sc1_5
			3Sc1_6
			3Sc1_7
			3Sc2_2
			3Sc2_3
			3Sc2_4
			3Sc2_5
			3Sc2_6
			3Sc2_7
			3Sc2_8
			3Sc2_9
			3Sc2_10
			3Sc2_11
			3Sc2_12
			3Sc2_13
			3Sc2_14
			3Sc2_15
			3Sc2_16
			3Sc2_17
			3Sc2_18
			3Sc2_19
			3Sc2_20
			3Sc2_21
			3Sc2_22
			3Sc3_1
			3Sc3_2
			UnSc68_2
			3Sc4_1
			3Sc4_2
			UnSc94_2
			3Sc5_2
			3Sc5_3
			3Sc5_4
			UnSc42_2
			UnSc31_2
			UnSc31_1
			UnSc42_1
			4Sc1_1
			4Sc1_2
			4Sc1_3
			4Sc2_1
			4Sc3_1
			4Sc3_2
			4Sc3_3
			4Sc3_4
			4Sc3_5
			4Sc3_6
			4Sc3_7
			4Sc3_8
			4Sc3_9
			4Sc3_11
			4Sc3_12
			4Sc3_13
			4Sc3_14
			4Sc3_15
			4Sc3_16
			4Sc4_1
			4Sc4_2
			4Sc4_3
			4Sc4_4
			4Sc4_5
			4Sc4_6
			4Sc4_7
			4Sc4_8
			4Sc4_9
			4Sc4_10
			4Sc4_11
			4Sc4_12
			4Sc4_13
			4Sc4_14
			4Sc4_15
			4Sc4_16
			4Sc4_17
			4Sc4_18
			4Sc6_12
			4Sc6_11
			4Sc6_10
			4Sc6_9
			4Sc6_8
			4Sc6_7
			4Sc6_5
			4Sc6_6
			4Sc6_4
			4Sc5_10
			4Sc6_3
			4Sc6_1
			UnSc25_1
			4Sc6_2
			4Sc5_8
			4Sc5_7
			4Sc5_5
			4Sc5_6
			4Sc5_4
			4Sc5_9
			4Sc5_3
			4Sc5_2
			4Sc7_1
			4Sc7_3
			4Sc7_2
			4Sc7_4
			4Sc7_5
			4Sc8_2
			4Sc8_3
			4Sc8_4
			UnSc32_2
			UnSc32_1
			UnSc53_2
			UnSc53_1
			UnSc18_2
			UnSc18_1
			UnSc5_1
			UnSc5_2
			UnSc5_3
			UnSc4_1
			UnSc4_2
			UnSc4_3
			UnSc4_4
			5Sc1_15
			5Sc1_14
			5Sc1_13
			5Sc1_12
			5Sc1_11
			5Sc1_10
			5Sc1_9
			5Sc1_8
			5Sc1_7
			5Sc1_6
			5Sc1_5
			5Sc1_4
			5Sc1_3
			5Sc1_2
			5Sc1_1
			5Sc2_1
			5Sc2_2
			5Sc2_3
			5Sc2_4
			5Sc2_5
			5Sc2_6
			5Sc3_2
			5Sc3_1
			5Sc4_2
			5Sc4_1
			UnSc27_2
			UnSc27_1
			5Sc5_1
			5Sc6_2
			5Sc5_2
			5Sc6_1
			UnSc8_2
			UnSc8_1
			6Sc1_2
			6Sc1_1
			6Sc2_7
			6Sc2_6
			6Sc2_5
			6Sc2_4
			6Sc2_3
			6Sc2_2
			6Sc2_1
			6Sc3_1
			6Sc3_2
			6Sc3_4
			6Sc3_3
			6Sc3_5
			6Sc3_6
			6Sc3_7
			6Sc3_8
			6Sc3_9
			6Sc3_10
			6Sc3_11
			6Sc3_12
			6Sc3_13
			6Sc3_14
			6Sc3_15
			6Sc3_16
			6Sc3_17
			6Sc3_18
			6Sc3_19
			6Sc3_20
			6Sc3_21
			6Sc3_22
			6Sc3_23
			6Sc3_24
			6Sc3_25
			6Sc4_2
			6Sc5_1
			6Sc5_2
			UnSc56_2
			UnSc36_2
			UnSc36_1
			UnSc38_1
			UnSc38_2
			7Sc1_2
			7Sc1_1
			7Sc2_1
			7Sc2_2
			7Sc3_2
			7Sc3_3
			7Sc4_1
			7Sc4_2
			7Sc4_4
			7Sc4_5
			7Sc5_1
			7Sc5_2
			7Sc5_3
			7Sc5_4
			7Sc5_5
			7Sc5_6
			7Sc5_7
			7Sc5_8
			7Sc5_10
			7Sc5_9
			7Sc5_11
			UnSc24_1
			7Sc5_12
			UnSc3_4
			UnSc3_1
			UnSc3_3
			UnSc3_2
			7Sc6_1
			UnSc24_2
			7Sc6_4
			7Sc6_5
			7Sc6_6
			7Sc6_7
			7Sc6_8
			7Sc6_10
			7Sc6_9
			7Sc6_11
			7Sc6_12
			7Sc6_14
			7Sc6_15
			7Sc6_13
			7Sc6_16
			7Sc6_17
			7Sc6_18
			7Sc6_19
			7Sc6_20
			7Sc6_21
			7Sc6_22
			7Sc6_24
			7Sc6_23
			7Sc6_25
			7Sc6_26
			7Sc6_27
			7Sc6_28
			7Sc6_29
			7Sc6_30
			7Sc6_31
			7Sc6_32
			7Sc6_33
			7Sc6_34
			7Sc7_2
			UnSc39_1
			UnSc6_3
			UnSc6_2
			8Sc1_1
			8Sc1_2
			8Sc1_3
			8Sc2_1
			8Sc2_2
			8Sc2_3
			8Sc2_4
			8Sc2_5
			8Sc2_6
			8Sc2_7
			8Sc3_1
			8Sc3_2
			8Sc3_3
			8Sc3_4
			8Sc3_5
			8Sc3_6
			8Sc3_7
			8Sc3_9
			8Sc3_8
			8Sc3_10
			8Sc3_11
			8Sc3_12
			8Sc3_13
			8Sc3_14
			8Sc3_15
			8Sc3_17
			8Sc3_16
			8Sc3_18
			8Sc3_19
			8Sc3_20
			8Sc3_21
			8Sc3_22
			8Sc3_23
			8Sc3_24
			8Sc3_25
			8Sc3_26
			8Sc3_27
			8Sc3_28
			8Sc4_1
			8Sc4_2
			8Sc6_2
			8Sc6_1
			8Sc5_2
			8Sc5_1
			9Sc1_1
			9Sc1_2
			9Sc1_3
			9Sc1_4
			9Sc1_5
			9Sc1_6
			9Sc1_7
			9Sc1_9
			9Sc2_28
			9Sc2_27
			9Sc1_8
			9Sc2_26
			9Sc2_25
			9Sc2_24
			9Sc2_23
			9Sc2_22
			9Sc2_21
			9Sc2_20
			9Sc2_19
			9Sc2_18
			9Sc2_17
			9Sc2_16
			9Sc2_15
			9Sc2_14
			9Sc2_13
			9Sc2_12
			9Sc2_11
			9Sc2_10
			9Sc2_9
			9Sc2_8
			9Sc2_7
			9Sc2_6
			9Sc2_5
			9Sc2_4
			9Sc2_3
			9Sc2_2
			9Sc2_1
			9Sc3_1
			9Sc3_2
			9Sc4_2
			9Sc4_1
			9Sc5_1
			9Sc5_2
			9Sc6_2
			9Sc6_1
			9Sc8_1
			UnSc91_2
			UnSc74_1
			UnSc74_2
			9Sc9_1
			UnSc136_1
			9Sc8_2
			9Sc9_2
			UnSc26_1
			UnSc26_2
			UnSc37_2
			UnSc37_1
			UnSc7_2
			10Sc1_1
			10Sc1_3
			10Sc1_4
			10Sc1_5
			10Sc1_6
			10Sc1_7
			10Sc1_8
			10Sc1_9
			10Sc1_10
			10Sc1_11
			10Sc1_12
			10Sc1_13
			10Sc1_14
			10Sc1_15
			10Sc1_16
			10Sc1_17
			10Sc1_18
			10Sc1_19
			10Sc1_20
			10Sc1_21
			10Sc1_22
			10Sc1_23
			10Sc1_24
			10Sc1_25
			10Sc1_26
			10Sc1_27
			10Sc1_28
			10Sc1_29
			10Sc2_2
			10Sc1_30
			UnSc50_1
			UnSc50_2
			10Sc2_1
			UnSc101_2
			UnSc101_1
			10Sc2_3
			UnSc14_1
			UnSc14_2
			11Sc1_2
			11Sc1_1
			11Sc2_4
			11Sc2_3
			11Sc2_2
			11Sc2_1
			11Sc3_1
			11Sc3_2
			11Sc3_3
			11Sc3_4
			11Sc3_5
			11Sc3_6
			11Sc3_7
			11Sc3_8
			11Sc3_9
			11Sc3_10
			11Sc3_11
			11Sc3_12
			11Sc3_13
			11Sc3_14
			11Sc3_15
			11Sc3_16
			11Sc3_17
			11Sc3_18
			11Sc3_19
			11Sc3_20
			11Sc3_21
			11Sc3_22
			11Sc3_23
			11Sc3_24
			11Sc3_25
			11Sc3_26
			UnSc52_1
			UnSc52_2
			11Sc4_2
			11Sc4_1
			11Sc5_1
			11Sc6_2
			11Sc6_1
			11Sc7_1
			UnSc28_2
			UnSc44_2
			UnSc28_1
			UnSc44_1
			UnSc88_2
			UnSc77_1
			12Sc1_2
			12Sc2_1
			12Sc2_2
			12Sc2_3
			UnSc22_2
			UnSc22_1
			UnSc10_1
			UnSc10_2
			12Sc3_1
			12Sc3_2
			12Sc4_29
			12Sc4_28
			12Sc4_27
			12Sc4_26
			12Sc4_25
			12Sc4_24
			12Sc4_22
			12Sc4_23
			12Sc4_21
			12Sc4_20
			12Sc4_19
			12Sc4_18
			12Sc4_17
			12Sc4_16
			12Sc4_14
			12Sc4_13
			12Sc4_12
			12Sc4_11
			12Sc4_10
			12Sc4_9
			12Sc4_8
			12Sc4_7
			12Sc4_6
			12Sc4_5
			12Sc4_4
			12Sc4_3
			12Sc4_2
			12Sc5_2
			12Sc5_1
			12Sc6_3
			12Sc6_2
			12Sc6_1
			UnSc49_1
			UnSc49_2
			13Sc1_3
			13Sc1_2
			13Sc1_1
			13Sc2_1
			13Sc2_2
			13Sc2_3
			13Sc3_1
			13Sc3_2
			13Sc3_3
			13Sc3_4
			13Sc3_5
			13Sc3_6
			13Sc3_8
			13Sc3_10
			13Sc3_9
			13Sc3_11
			13Sc3_12
			13Sc3_13
			13Sc3_14
			13Sc3_15
			13Sc3_16
			13Sc3_17
			13Sc3_19
			13Sc3_18
			13Sc3_20
			13Sc3_21
			13Sc3_22
			13Sc3_23
			13Sc3_24
			13Sc3_25
			13Sc3_26
			13Sc3_27
			13Sc3_28
			13Sc3_29
			13Sc3_30
			13Sc3_31
			13Sc3_32
			13Sc4_3
			13Sc4_2
			13Sc4_1
			13Sc5_2
			13Sc5_1
			UnSc93_1
			UnSc51_2
			UnSc51_1
			UnSc40_2
			UnSc73_2
			14Sc1_2
			14Sc1_1
			UnSc90_2
			UnSc67_2
			UnSc67_1
			14Sc2_1
			14Sc2_2
			14Sc2_3
			14Sc2_4
			14Sc2_5
			14Sc2_6
			14Sc2_7
			14Sc2_8
			14Sc2_10
			14Sc2_11
			14Sc2_12
			14Sc2_13
			14Sc2_14
			14Sc2_15
			14Sc2_16
			14Sc2_17
			14Sc2_18
			14Sc2_19
			14Sc2_20
			14Sc2_21
			14Sc2_22
			14Sc2_23
			14Sc2_24
			14Sc3_4
			14Sc3_5
			14Sc3_3
			14Sc3_2
			UnSc16_2
			UnSc16_1
			15Sc1_2
			15Sc1_1
			UnSc58_1
			UnSc58_2
			UnSc80_2
			UnSc80_1
			15Sc2_2
			15Sc2_1
			15Sc3_1
			15Sc3_2
			15Sc3_3
			15Sc3_4
			15Sc3_5
			15Sc3_7
			15Sc3_9
			15Sc3_10
			15Sc3_11
			15Sc3_12
			15Sc3_13
			15Sc3_14
			15Sc3_15
			15Sc3_16
			15Sc3_17
			15Sc3_18
			15Sc3_19
			15Sc3_20
			15Sc3_21
			15Sc3_22
			15Sc3_23
			15Sc3_24
			15Sc3_25
			15Sc4_4
			15Sc3_26
			15Sc4_3
			15Sc4_2
			15Sc4_1
			UnSc15_1
			UnSc15_2
			16Sc1_1
			16Sc1_2
			16Sc1_3
			16Sc1_4
			16Sc1_5
			16Sc1_6
			16Sc1_7
			16Sc1_8
			16Sc1_9
			16Sc1_10
			16Sc1_11
			16Sc2_1
			16Sc2_2
			16Sc2_3
			16Sc2_4
			16Sc2_5
			16Sc2_6
			16Sc2_7
			16Sc2_8
			16Sc2_9
			16Sc2_10
			16Sc2_11
			16Sc2_12
			16Sc2_13
			16Sc2_14
			16Sc2_15
			16Sc2_16
			16Sc2_17
			16Sc2_18
			16Sc2_19
			16Sc2_20
			16Sc2_21
			16Sc2_22
			16Sc3_4
			16Sc3_3
			16Sc3_1
			16Sc3_2
			UnSc29_2
			UnSc29_1
			UnSc95_2
			UnSc95_1
			UnSc78_1
			UnSc11_1
			UnSc11_2
			UnSc17_2
			17Sc1_2
			17Sc1_1
			17Sc2_1
			17Sc3_2
			17Sc4_2
			17Sc5_2
			17Sc5_3
			17Sc5_4
			17Sc5_5
			17Sc5_6
			17Sc5_7
			17Sc5_8
			17Sc5_9
			17Sc5_10
			17Sc5_11
			UnSc1_11
			17Sc5_12
			UnSc1_9
			UnSc1_10
			UnSc1_8
			UnSc1_5
			UnSc1_2
			17Sc6_1
			UnSc1_3
			UnSc1_6
			UnSc1_7
			UnSc1_4
			17Sc6_3
			17Sc6_2
			17Sc6_5
			17Sc6_4
			17Sc6_6
			17Sc6_7
			17Sc6_8
			17Sc6_9
			17Sc6_10
			17Sc6_11
			17Sc6_12
			17Sc6_13
			17Sc6_14
			17Sc6_15
			17Sc6_16
			17Sc6_17
			18Sc1_1
			18Sc1_2
			18Sc1_3
			18Sc1_4
			18Sc1_5
			18Sc1_6
			18Sc1_7
			18Sc1_8
			18Sc2_1
			18Sc2_2
			18Sc1_10
			18Sc1_9
			18Sc2_3
			18Sc2_4
			18Sc2_5
			18Sc2_6
			18Sc2_7
			18Sc2_8
			18Sc2_9
			18Sc2_10
			18Sc2_11
			18Sc2_12
			18Sc2_13
			18Sc2_14
			18Sc2_15
			18Sc3_1
			18Sc3_2
			18Sc3_3
			18Sc3_4
			18Sc3_5
			18Sc3_6
			18Sc3_7
			18Sc3_8
			19Sc1_1
			19Sc1_2
			UnSc62_2
			UnSc62_1
			19Sc2_1
			19Sc2_2
			19Sc2_3
			19Sc2_4
			UnSc116_2
			19Sc2_5
			19Sc2_7
			19Sc3_33
			19Sc3_31
			19Sc2_6
			19Sc3_32
			19Sc3_30
			19Sc3_29
			19Sc3_28
			19Sc3_27
			19Sc3_26
			19Sc3_23
			19Sc3_24
			19Sc3_25
			19Sc3_22
			19Sc3_21
			19Sc3_19
			19Sc3_20
			19Sc3_18
			19Sc3_17
			19Sc3_16
			19Sc3_13
			19Sc3_15
			19Sc3_11
			19Sc3_12
			19Sc3_14
			19Sc3_10
			19Sc3_9
			19Sc3_8
			19Sc3_7
			19Sc3_6
			19Sc3_5
			19Sc3_4
			19Sc3_3
			19Sc3_2
			19Sc3_1
			UnSc43_1
			UnSc57_1
			20Sc1_1
			UnSc57_2
			20Sc2_1
			20Sc2_2
			20Sc1_2
			UnSc43_2
			UnSc33_1
			UnSc33_2
			20Sc3_2
			20Sc4_35
			20Sc4_34
			20Sc4_33
			20Sc4_32
			20Sc4_31
			20Sc4_30
			20Sc4_29
			20Sc4_28
			20Sc4_27
			20Sc4_26
			20Sc4_25
			20Sc4_24
			20Sc4_22
			20Sc4_23
			20Sc4_21
			20Sc4_20
			20Sc4_19
			20Sc4_17
			20Sc4_18
			20Sc4_16
			20Sc4_15
			20Sc4_14
			20Sc4_13
			20Sc4_12
			20Sc4_11
			20Sc4_10
			20Sc4_9
			20Sc4_8
			20Sc4_7
			20Sc4_6
			20Sc4_5
			20Sc4_4
			20Sc4_3
			20Sc4_2
			20Sc4_1
			20Sc5_1
			20Sc5_2
			20Sc5_3
			20Sc5_4
			UnSc20_1
			UnSc41_1
			21Sc1_2
			UnSc2_1
			UnSc2_2
			UnSc2_3
			UnSc2_4
			UnSc2_5
			UnSc2_6
			21Sc2_4
			21Sc2_3
			21Sc2_5
			21Sc2_6
			21Sc2_7
			21Sc2_8
			21Sc2_9
			21Sc2_10
			21Sc2_11
			21Sc2_12
			21Sc2_13
			21Sc2_14
			21Sc2_15
			21Sc2_16
			21Sc2_17
			21Sc2_18
			21Sc2_19
			21Sc3_1
			21Sc3_2
			21Sc3_3
			21Sc3_4
			UnSc9_2
			21Sc4_2
			UnSc34_2
			UnSc47_2
			UnSc47_1
			UnSc79_2
			UnSc79_1
			id
			1Sc1_2
			1Sc1_1
			UnSc82_2
			1Sc2_1
			1Sc2_2
			1Sc3_1
			1Sc3_2
			UnSc72_1
			UnSc72_2
			UnSc64_1
			UnSc64_2
			1Sc4_1
			1Sc4_2
			1Sc4_3
			1Sc4_4
			1Sc4_5
			1Sc4_6
			1Sc4_7
			1Sc4_8
			1Sc4_9
			1Sc5_1
			1Sc5_2
			1Sc5_3
			1Sc5_11
			1Sc5_4
			1Sc5_9
			1Sc5_6
			1Sc5_8
			1Sc5_7
			1Sc5_14
			1Sc5_12
			1Sc5_13
			1Sc5_5
			1Sc5_10
			1Sc5_15
			1Sc5_16
			1Sc5_17
			1Sc5_19
			1Sc5_20
			1Sc5_21
			1Sc5_22
[truncated: 60,656 more rows]

## Sheet: Genotypes
id	83_2	83_1	186_2	92_1	92_2	97_1	97_2	175_1	175_2	165_1	165_2	30_1	30_2	30_3	30_4	30_5	30_6	30_7	30_8	30_9	7_1	7_2	7_3	7_11	7_4	7_9	7_6	7_8	7_7	7_14	7_12	7_13	7_5	7_10	7_15	7_16	7_17	7_19	7_20	7_21	7_22	7_23	7_24	7_25	7_26	7_27	119_2	22_15	22_14
	1	1	1	1	1	1	1	1	1	1	1	1	1	1	1	1	1	1	1	1	1	1	1	1	1	1	1	1	1	1	1	1	1	1	1	1	1	1	1	1	1	1	1	1	1	1	1	1	1
	0	0.127	0.317	0.534	0.861	3.649	5.317	8.626	9.392	12.132	16.492	20.946	28.649	35.712	40.21	44.06	47.952	49.246	50.816	52.323	53.006	53.275	54.189	54.748	54.823	54.925	54.929	54.988	55.096	55.316	55.382	55.464	55.533	55.672	56.224	56.749	57.952	60.279	61.861	63.038	66.081	68.273	68.746	70.996	72.132	73.784	74.498	75.08	76.528
BepaF2_1_1	MF	MF	MF	MF	MF	MF	MF	MF	notFF	MF	notFF	MF	MF	MF	MF	MF	MF	MF	MF	MF	MF	MF	MF	MF	MF	MF	MF	MF	MF	MF	MF	MF	MF	MF	MF	MF	MF	MF	MF	MF	MF	MF	MF	MF	FF	FF	FF	FF	FF
BepaF2_1_2	notMM	FF	notMM	FF	FF	FF	FF	FF	notMM	FF	notMM	MF	MF	MF	MF	MF	MF	MF	MF	MF	MF	MF	MF	MF	MF	MF	MF	MF	MF	MF	MF	MF	MF	MF	MF	MF	MF	MF	MF	MF	MF	MF	MF	MF	MF	MF	MF	MF	MF
BepaF2_1_3	MM	MM	notFF	MM	MM	MM	MM	MF	MF	notMM	notMM	MF	MF	FF	FF	FF	FF	FF	FF	FF	FF	FF	FF	FF	FF	FF	FF	FF	FF	FF	FF	FF	FF	FF	FF	FF	FF	FF	FF	FF	FF	FF	FF	FF	FF	FF	notMM	MF	MF
BepaF2_1_4	FF	FF	FF	FF	FF	FF	FF	FF	notMM	MF	MF	MF	MF	MF	MF	MF	MF	MF	MF	MF	MF	MF	MF	MF	MF	MF	MF	MF	MF	MF	MF	MF	MF	MF	MF	MF	MF	MF	MF	MF	MF	FF	FF	FF	FF	FF	FF	FF	FF
BepaF2_1_5	MF	MF	MF	MF	MF	MF	MM	MM	MM	MM	MM	MM	MM	MM	MM	MM	MM	MM	MM	MM	MM	MM	MM	MM	MM	MM	MM	MM	MM	MM	MM	MM	MM	MM	MM	MM	MM	MM	MM	MM	MM	MM	MM	MM	MM	MM	MM	MM	MM
BepaF2_1_6	MF	MF	MF	MF	MF	MF	MF	FF	MF	MF	notFF	MF	MF	MM	MM	MM	MM	MM	MM	MM	MM	MM	MM	MM	MM	MM	MM	MM	MM	MM	MM	MM	MM	MM	MM	MM	MM	MM	MM	MM	MM	MM	MM	MM	MM	MM	MM	MM	MM
BepaF2_1_7	MM	MM	MM	MM	MM	MM	MF	MF	MF	MF	FF	FF	FF	FF	FF	FF	FF	FF	FF	FF	FF	FF	FF	FF	FF	FF	FF	FF	FF	FF	FF	FF	FF	FF	FF	FF	FF	FF	FF	FF	FF	FF	FF	FF	FF	FF	FF	FF	FF
BepaF2_1_8	MF	MF	MF	MF	MF	MF	MF	MF	MF	MF	MF	MF	MF	MM	MM	MM	MM	MM	MM	MM	MM	MM	MM	MM	MM	MM	MM	MM	MM	MM	MM	MM	MM	MM	MM	MM	MM	MM	MM	MM	MM	MM	MM	MM	MM	MF	MF	MF	MF
BepaF2_1_9	MF	MF	MF	FF	FF	FF	FF	FF	FF	FF	FF	FF	FF	FF	FF	MF	MF	MF	MF	MF	MF	MF	MF	MF	MF	MF	MF	MF	MF	MF	MF	MF	MF	MF	MF	MF	MF	MF	MF	MF	FF	FF	FF	FF	FF	FF	FF	FF	FF
BepaF2_1_10	FF	FF	FF	FF	FF	FF	FF	FF	FF	FF	notMM	MF	MF	MF	MF	MM	MM	MM	MM	MM	MM	MM	MM	MM	MM	MM	MM	MM	MM	MM	MM	MM	MM	MM	MM	MM	MM	MM	MM	MM	MM	MM	MM	MM	MM	MM	MM	MM	MM
BepaF2_1_11	FF	FF	FF	FF	FF	FF	FF	FF	FF	MF	MF	MF	MF	MF	MF	MF	MF	MF	MF	MF	MF	MF	MF	MF	MF	MF	MF	MF	MF	MF	MF	MF	MF	MF	MF	MF	MF	FF	FF	FF	FF	FF	FF	FF	FF	FF	FF	FF	FF
BepaF2_1_12	MF	MF	MF	MF	MF	MF	MF	MF	MF	MF	notFF	MF	FF	FF	FF	FF	FF	FF	FF	FF	FF	FF	FF	FF	FF	FF	FF	FF	FF	FF	FF	FF	FF	FF	FF	FF	FF	FF	FF	FF	FF	FF	FF	FF	FF	FF	FF	FF	FF
BepaF2_1_13	MM	MM	MM	MM	MM	MM	MM	MM	MM	MM	notFF	MM	MM	MM	MM	MM	MM	MM	MM	MF	MF	MF	MF	MF	MF	MF	MF	MF	MF	MF	MF	MF	MF	MF	MF	MF	MF	MF	MF	MF	MM	MM	MM	MM	MM	MM	MM	MM	MM
BepaF2_1_14	MF	MF	MF	MF	MF	MF	MF	MF	MF	MF	notFF	MM	MM	MM	MM	MM	MM	MM	MF	MF	MF	MF	MF	MF	MF	MF	MF	MF	MF	MF	MF	MF	MF	MF	MF	MF	MF	MF	MF	MF	MF	MF	MF	MF	MF	MF	MF	MF	MF
BepaF2_1_15	FF	FF	FF	FF	FF	FF	FF	FF	FF	FF	notMM	FF	MF	MF	MF	MF	MF	MF	MF	MF	MF	MF	MF	MF	MF	MF	MF	MF	MF	MF	MF	MF	MF	MF	MF	MF	MF	MF	MF	MF	MF	MM	MM	MM	MM	MM	MM	MM	MM
BepaF2_1_16	MF	MF	MF	MF	MF	MF	MF	MF	MM	MM	notFF	MM	MM	MF	MF	MF	MF	MF	MF	MF	MF	MF	MF	MF	MF	MF	MF	MF	MF	MF	MF	MF	MF	MF	MF	MF	MF	MF	MF	MF	MF	MF	MF	MF	MF	MF	notFF	MF	MF
BepaF2_1_17	MF	MF	MF	MF	MF	MF	MF	MF	MF	MF	MF	MF	MF	FF	FF	FF	FF	FF	FF	FF	FF	FF	FF	FF	FF	FF	FF	FF	FF	FF	FF	FF	FF	FF	FF	FF	FF	FF	FF	FF	FF	FF	FF	FF	FF	FF	FF	FF	FF
BepaF2_1_18	MF	MF	MF	MF	MF	MF	MF	MF	MF	MF	notFF	MF	MF	MF	MF	MF	MF	MF	MF	MF	MF	MF	MF	MF	MF	MF	MF	MF	MF	MF	MF	MF	MF	MF	MF	MF	MF	MF	MF	MF	MF	MF	MF	MF	MF	MF	notMM	MF	MF
BepaF2_1_19	MM	MM	MM	MM	MM	MM	MM	MF	MF	MF	MF	MF	MF	MF	FF	FF	FF	FF	FF	FF	FF	FF	FF	FF	FF	FF	FF	FF	FF	FF	FF	FF	FF	FF	FF	FF	FF	FF	FF	FF	FF	FF	FF	FF	FF	FF	FF	FF	FF
BepaF2_1_20	MF	MF	MF	MF	MF	MF	MF	MF	MF	MF	MF	MF	MF	MF	MF	MF	MF	MF	MF	MF	MF	MF	MF	MF	MF	MF	MF	MF	MF	MF	MF	MF	MF	MF	MF	MF	MF	MF	MF	MF	MF	MF	MF	MF	MF	MF	MF	MF	MF
BepaF2_1_21	MF	MF	MF	MF	MF	MF	MF	MF	MF	MF	MF	MF	MF	MF	FF	FF	FF	FF	FF	FF	FF	FF	FF	FF	FF	FF	FF	FF	FF	FF	FF	FF	FF	FF	FF	FF	FF	FF	FF	FF	FF	FF	FF	FF	FF	FF	FF	FF	FF
BepaF2_1_22	MF	MF	MF	MF	MF	MF	MF	MF	MF	MF	MF	MF	MM	MM	MM	MM	MM	MM	MM	MM	MM	MM	MM	MM	MM	MM	MM	MM	MM	MM	MM	MM	MM	MM	MM	MM	MM	MM	MM	MM	MM	MM	MM	MM	MM	MM	MM	MM	MM
BepaF2_1_23	FF	FF	FF	FF	FF	FF	FF	FF	FF	FF	FF	FF	FF	FF	FF	FF	FF	FF	FF	FF	FF	FF	FF	FF	FF	FF	FF	FF	FF	FF	FF	FF	FF	FF	FF	FF	FF	FF	FF	FF	FF	FF	FF	FF	FF	FF	FF	FF	FF
BepaF2_1_24	MF	MF	notMM	MF	MF	MF	MF	MF	MF	MF	MF	MF	MF	MF	FF	FF	FF	FF	FF	FF	FF	FF	FF	FF	FF	FF	FF	FF	FF	FF	FF	FF	FF	FF	FF	FF	FF	FF	FF	FF	FF	FF	FF	MF	MF	MF	MF	MF	MF
BepaF2_1_25	MF	MF	MF	MF	MF	MF	MF	MF	MF	MF	MF	MF	MF	MF	MF	MF	MF	MF	MF	MF	MF	MF	MF	MF	MF	MF	MF	MF	MF	MF	MF	MF	MF	MF	MF	MF	MF	MF	MF	MF	MF	MF	MF	MF	MF	MF	MF	MF	MF
BepaF2_1_26	FF	FF	FF	FF	FF	FF	FF	FF	FF	FF	FF	FF	FF	FF	FF	FF	FF	FF	FF	FF	FF	FF	FF	FF	FF	FF	FF	FF	FF	FF	FF	FF	FF	FF	FF	FF	FF	FF	FF	FF	FF	FF	FF	FF	FF	FF	FF	FF	FF
BepaF2_1_27	FF	FF	FF	FF	FF	FF	FF	FF	FF	FF	FF	FF	FF	FF	FF	FF	FF	FF	FF	FF	FF	FF	FF	FF	FF	FF	FF	FF	FF	FF	FF	FF	FF	FF	FF	FF	FF	FF	FF	FF	FF	FF	FF	FF	FF	FF	FF	FF	FF
BepaF2_1_28	FF	FF	FF	FF	FF	FF	FF	FF	FF	FF	FF	FF	MF	MF	MF	MF	MM	MM	MM	MM	MM	MM	MM	MM	MM	MM	MM	MM	MM	MM	MM	MM	MM	MM	MM	MM	MM	MM	MM	MM	MM	MM	MM	MM	MM	MM	MM	MM	MF
BepaF2_1_29	MM	MM	MM	MM	MM	MM	MM	MM	MM	MM	notFF	MM	MM	MM	MM	MM	MM	MM	MM	MF	MF	MF	MF	MF	MF	MF	MF	MF	MF	MF	MF	MF	MF	MF	MF	MF	MF	MF	MF	MF	MF	MF	MF	MF	MF	MF	MF	MF	MF
BepaF2_1_30	MF	MF	MF	MF	MF	MF	MF	MF	MF	MF	MF	MF	MF	MF	MF	MF	MF	MF	MF	MF	MF	MF	MF	MF	MF	MF	MF	MF	MF	MF	MF	MF	MF	MF	MF	MF	MF	MF	MF	MF	MF	MF	MF	MF	MF	MM	MM	MM	MM
BepaF2_1_31	MF	MF	MF	MF	MF	MF	MF	MF	MF	MF	notFF	MF	MF	MF	MF	MF	MF	MF	MF	MF	MF	MF	MF	MF	MF	MF	MF	MF	MF	MF	MF	MF	MF	MF	MF	MF	MF	MF	MF	MF	MF	MF	MF	MF	MF	MF	MF	MF	MF
BepaF2_1_32	MM	MM	notFF	MM	MM	MM	MM	MM	MM	MM	MF	MM	MM	MM	MM	MF	MF	MF	MF	MF	MF	MF	MF	MF	MF	MF	MF	MF	MF	MF	MF	MF	MF	MF	MF	MF	MF	MF	MF	MF	MF	MF	MF	MF	MF	MF	notMM	MF	MM
BepaF2_1_33	MM	MM	MM	MM	MM	MM	MM	MM	MM	MM	MM	MM	MM	MM	MM	MM	MM	MM	MM	MM	MM	MM	MM	MM	MM	MM	MM	MM	MM	MM	MM	MM	MM	MM	MM	MM	MM	MM	MM	MM	MM	MM	MM	MM	MM	MM	MM	MM	MM
BepaF2_1_34	MF	MF	MF	MF	MF	MF	MF	MF	MF	MF	MF	MF	FF	FF	FF	MF	MF	MF	MF	MF	MF	MF	MF	MF	MF	MF	MF	MF	MF	MF	MF	MF	MF	MF	MF	MF	MF	MF	MF	MF	MF	MF	MF	MF	MF	MF	MF	MF	MF
BepaF2_1_35	MF	MF	MF	MF	MF	MF	MF	MF	MF	MF	MF	FF	FF	FF	MF	MF	MF	MF	MF	MF	MF	MF	MF	MF	MF	MF	MF	MF	MF	MF	MF	MF	MF	MF	MF	MF	MF	MF	MF	MF	MF	MF	MF	MF	MF	MF	MF	MF	MF
BepaF2_1_36	MM	MM	MM	MM	MM	MM	MM	MM	MM	MM	MM	MM	MM	MF	MF	MF	MF	MF	MF	MF	MF	MF	MF	MF	MF	MF	MF	MF	MF	MF	MF	MF	MF	MF	MF	MF	MF	MF	MF	MF	MF	MF	MF	MF	MF	MF	MF	MF	MF
BepaF2_1_37	FF	FF	FF	FF	FF	FF	FF	FF	FF	FF	notMM	FF	FF	FF	FF	FF	FF	FF	MF	MM	MM	MM	MM	MM	MM	MM	MM	MM	MM	MM	MM	MM	MM	MM	MM	MM	MM	MM	MM	MM	MM	MM	MM	MF	MF	MF	notFF	MF	MF
BepaF2_1_38	MF	MF	MF	MF	MF	MF	MF	MF	MF	MF	MM	MF	MF	MF	FF	FF	FF	FF	FF	FF	FF	FF	FF	FF	FF	FF	FF	FF	FF	FF	FF	FF	FF	FF	FF	FF	FF	FF	FF	FF	MF	MF	MF	MF	MF	MF	MF	MF	MF
BepaF2_1_39	MF	MF	notFF	MF	MF	MF	FF	FF	FF	FF	notMM	FF	FF	FF	MF	MF	MF	MF	MF	MF	MF	MF	MF	MF	MF	MF	MF	MF	MF	MF	MF	MF	MF	MF	MF	MF	MF	MF	MF	MF	MM	MM	MM	MM	MM	MM	MM	MM	MM
BepaF2_1_40	MM	MM	MM	MM	MM	MM	MM	MM	MM	MM	notFF	MM	MM	MF	MF	MF	MF	MF	MF	MF	FF	FF	FF	FF	FF	FF	FF	FF	FF	FF	FF	FF	FF	FF	FF	FF	FF	FF	FF	FF	FF	FF	FF	FF	FF	FF	FF	FF	FF
BepaF2_1_41	FF	FF	FF	FF	FF	FF	FF	FF	FF	FF	notMM	FF	FF	FF	FF	FF	FF	FF	FF	FF	FF	FF	FF	FF	FF	FF	FF	FF	FF	FF	FF	FF	FF	FF	FF	FF	FF	MF	MF	MF	MF	MF	MF	MF	MF	MF	MF	MF	MF
BepaF2_1_42	MF	MF	MF	MF	MF	MF	MF	MF	MF	MF	MF	MF	MF	MF	MF	MF	MF	MF	MF	MF	MF	MF	MF	MF	MF	MF	MF	MF	MF	MF	MF	MF	MF	MF	MF	MF	MF	MF	MF	MF	MF	MF	MF	MF	MF	MF	FF	FF	FF
BepaF2_1_43	MM	MM	notFF	MM	MM	MM	MM	MM	MM	MM	notFF	MM	MM	MM	MM	MM	MM	MM	MM	MM	MM	MM	MM	MM	MM	MM	MM	MM	MM	MF	MF	MF	MM	MM	MF	MF	MF	MF	MF	MF	MF	MF	MF	MF	MF	MF	MF	MF	MF
BepaF2_1_44	MF	MF	MF	MF	MF	MF	FF	FF	FF	FF	FF	FF	FF	FF	FF	FF	FF	FF	FF	FF	FF	FF	FF	FF	FF	FF	FF	FF	FF	FF	FF	FF	FF	FF	FF	FF	FF	FF	MF	MF	MF	MF	MF	MF	MF	MF	MF	MF	MF
BepaF2_1_45	MF	MF	MF	MF	MF	MM	MM	MM	MM	MM	notFF	MM	MF	MF	MF	MF	MF	MF	MF	MF	MF	MF	MF	MF	MF	MF	MF	MF	MF	MF	MF	MF	MF	MF	MF	MF	MF	MM	MM	MM	MM	MM	MM	MM	MM	MM	MM	MM	MM
BepaF2_1_46	FF	FF	FF	FF	FF	MF	MF	MF	MF	MF	MF	MF	MF	MF	MF	MF	MF	MF	MF	MF	MF	MF	MF	MF	MF	MF	MF	MF	MF	MF	MF	MF	MF	MF	MF	MF	MF	FF	FF	FF	FF	FF	FF	FF	FF	FF	FF	FF	FF
BepaF2_1_47	MF	MF	notMM	MF	MF	MF	MF	MF	MF	MF	MF	MF	MF	MF	MF	MF	MF	FF	FF	FF	FF	FF	FF	FF	FF	FF	FF	FF	FF	FF	FF	FF	FF	FF	FF	FF	FF	FF	FF	FF	FF	FF	FF	FF	FF	FF	FF	FF	FF
BepaF2_1_48	FF	FF	FF	FF	FF	FF	FF	FF	FF	MF	MF	MF	MF	MF	MF	MF	MF	MF	MF	MF	MF	MF	MF	MF	MF	MF	MF	MF	MF	MF	MF	MF	MF	MF	MF	MF	MF	MF	MF	MF	MF	MF	MF	MF	MF	MF	MF	MF	MF
BepaF2_1_49	FF	FF	FF	FF	FF	FF	FF	FF	FF	FF	FF	FF	FF	FF	FF	FF	MF	MF	MF	MF	MF	MF	MF	MF	MF	MF	MF	MF	MF	MF	MF	MF	MF	MF	MF	MF	MF	MF	MF	MF	MF	MF	MF	MF	MF	MF	MF	MF	MF
BepaF2_1_50	FF	FF	FF	FF	FF	FF	FF	FF	FF	FF	notFF	MF	MF	MF	MF	MF	MF	MF	MM	MM	MM	MM	MM	MM	MM	MM	MM	MM	MM	MM	MM	MM	MM	MM	MM	MM	MM	MM	MM	MM	MM	MM	MM	MM	MM	MM	MM	MM	MM
BepaF2_1_51	MF	MF	MF	MF	MF	MF	MF	MF	MF	MF	MF	MF	MF	MF	MF	MF	MF	MF	MF	MF	MF	MF	MF	MF	MF	MF	MF	MF	MF	MF	MF	MF	MF	MF	MF	MF	MF	MF	MF	MF	MF	MF	MF	MF	MF	MF	FF	FF	FF
BepaF2_1_52	MM	MM	MM	MM	MM	MM	MM	MF	MF	MF	MF	MF	MF	MF	MF	MF	MF	MF	MF	MF	MF	MF	MF	MF	MF	MF	MF	MF	MF	MF	MF	MF	MF	MF	MF	MF	MF	MF	MF	MF	MM	MM	MM	MM	MM	MM	MM	MM	MM
BepaF2_1_53	MF	MF	MF	MF	MF	MF	MF	MF	MF	notMM	FF	FF	MF	MF	MF	MF	MF	MF	MF	MF	MF	MF	MF	MF	MF	MF	MF	MF	MF	MF	MF	MF	MF	MF	MF	MF	MF	MF	MF	MF	MF	MF	MF	MF	MF	MF	MF	MF	MF
BepaF2_1_54	MF	MF	MF	MF	MF	MF	MF	MF	MF	MF	MF	MF	MF	MF	MF	FF	FF	FF	FF	FF	FF	FF	FF	FF	FF	FF	FF	FF	FF	FF	FF	FF	FF	FF	FF	FF	FF	FF	FF	MF	MF	MF	MF	MF	MF	MF	MF	MF	MF
BepaF2_1_55	MM	MM	MM	MM	MM	MM	MM	MM	MM	MM	notFF	MF	MF	FF	FF	FF	FF	FF	FF	FF	FF	FF	FF	FF	FF	FF	FF	FF	FF	FF	FF	FF	FF	FF	FF	FF	FF	FF	FF	FF	FF	FF	FF	FF	FF	FF	FF	FF	FF
BepaF2_1_56	FF	FF	FF	FF	FF	FF	FF	FF	FF	FF	FF	FF	MF	MF	MF	MM	MM	MM	MM	MM	MM	MM	MM	MM	MM	MM	MM	MM	MM	MM	MM	MM	MM	MM	MM	MM	MM	MM	MM	MM	MM	MM	MM	MF	MF	MF	MF	MF	MF
BepaF2_1_57	MM	MM	MM	MM	MM	MM	MM	MM	MM	MM	notFF	MF	MF	MF	MF	MF	MF	MF	MF	MF	MF	MF	MF	MF	MF	MF	MF	MF	MF	MF	MF	MF	MF	MF	MF	MF	MF	MF	MF	MF	MF	MF	MF	MF	MF	MF	MF	MF	MF
BepaF2_1_58	MF	MF	MF	MF	MF	MF	MF	MF	MF	MF	notMM	FF	FF	FF	FF	FF	FF	FF	FF	FF	FF	FF	FF	FF	FF	FF	FF	FF	FF	FF	FF	FF	FF	FF	FF	FF	FF	FF	FF	FF	FF	FF	FF	FF	FF	FF	FF	FF	FF
BepaF2_1_59	MM	MM	MM	MM	MM	MM	MM	MM	MM	MM	notFF	MM	MM	MM	MM	MM	MM	MM	MM	MM	MM	MM	MM	MM	MM	MM	MM	MM	MM	MM	MM	MM	MM	MM	MM	MM	MM	MM	MM	MM	MM	MM	MM	MM	MM	MM	MM	MM	MM
BepaF2_1_60	MM	MM	MM	MM	MM	MM	MM	MM	MM	MM	MM	MM	MM	MM	MM	MM	MM	MM	MM	MM	MM	MM	MM	MM	MM	MM	MM	MM	MM	MM	MM	MM	MM	MM	MM	MM	MM	MM	MM	MM	MM	MM	MM	MM	MM	MM	MM	MM	MM
BepaF2_1_61	FF	FF	FF	FF	FF	FF	FF	FF	FF	FF	FF	MF	MF	MF	MF	MF	MF	MF	MF	MF	MF	MF	MF	MF	MF	MF	MF	MF	MF	MF	MF	MF	MF	MF	MF	MF	MF	MF	MF	MF	MF	MF	MF	MF	MF	MF	MF	MF	MF
BepaF2_1_62	MF	MF	notMM	MF	MF	MF	MF	MF	MF	MF	MF	MF	MF	MF	MF	MM	MM	MM	MM	MM	MM	MM	MM	MM	MM	MM	MM	MM	MM	MM	MM	MM	MM	MM	MM	MM	MM	MM	MM	MM	MM	MM	MM	MM	MM	MM	MM	MM	MM
BepaF2_1_63	MF	MF	MF	MF	MF	MF	MF	MF	MF	MF	MF	MF	MF	MF	MF	MF	MF	FF	FF	FF	FF	FF	FF	FF	FF	FF	FF	FF	FF	FF	FF	FF	FF	FF	FF	FF	FF	FF	FF	FF	FF	FF	FF	FF	FF	FF	FF	FF	FF
BepaF2_1_64	MF	MF	MF	MF	MF	MF	MF	MF	MF	MF	MF	MF	MF	MF	MF	MF	MM	MM	MM	MM	MM	MM	MF	MF	MF	MF	MF	MF	MF	MF	MF	MF	MF	MF	MF	MF	MF	MF	MF	MF	FF	FF	FF	FF	FF	FF	FF	FF	FF
BepaF2_1_65	MF	MF	MF	MF	MF	MF	MF	FF	FF	FF	MF	MF	MF	MF	MF	MF	MF	MF	MF	MF	MF	MF	MF	MF	MF	MF	MF	MF	MF	MF	MF	MF	MF	MF	MF	MF	MF	MF	MF	MF	MF	MF	MF	MF	MF	MF	MF	MF	MF
BepaF2_1_66	MF	MF	MF	MF	MF	MF	MF	MF	MF	MF	MF	MF	MF	MF	MF	MF	MF	MF	MF	MF	MF	MF	MF	MF	MF	MF	MF	MF	MF	MF	MF	MF	MF	MF	MF	MF	MF	MF	MF	MF	MF	MF	MF	MF	MF	MF	MF	MF	MF
BepaF2_1_67	FF	FF	FF	FF	FF	MF	MF	MF	MF	MF	MF	MF	MF	MF	MF	MF	MF	MF	MF	MF	MF	MF	MF	MF	MF	MF	MF	MF	MF	MF	MF	MF	MF	MF	MF	MF	MF	MF	MF	MF	MF	MF	MF	MF	MF	MF	MF	MF	MF
BepaF2_1_68	MF	MF	MF	MF	MF	MF	MF	MF	MF	MF	MF	MF	MF	FF	FF	FF	FF	FF	FF	FF	FF	FF	FF	FF	FF	FF	FF	FF	FF	FF	FF	FF	FF	FF	FF	FF	FF	FF	FF	FF	FF	FF	FF	FF	FF	FF	FF	FF	MF
BepaF2_1_69	MF	MF	MF	MF	MF	MF	MF	MF	MF	MF	MF	MF	MF	MF	MF	MF	MF	MF	MF	MF	MF	MF	MF	MF	MF	MF	MF	MF	MF	MF	MF	MF	MF	MF	MF	MF	MF	MF	MF	MF	MF	MF	MF	MF	MF	MF	MF	MF	MF
BepaF2_1_70	FF	FF	FF	FF	FF	FF	FF	FF	FF	FF	FF	FF	FF	FF	FF	FF	MF	MF	MF	MF	MF	MF	MF	MF	MF	MF	MF	MF	MF	MF	MF	MF	MF	MF	MF	MF	MF	MF	MF	MF	MF	MF	MF	MF	MF	MF	MF	MF	MF
BepaF2_1_71	FF	FF	FF	FF	FF	FF	FF	FF	FF	FF	FF	FF	FF	FF	FF	FF	FF	FF	FF	FF	FF	FF	FF	FF	FF	FF	FF	FF	FF	FF	FF	FF	FF	FF	FF	FF	FF	FF	FF	FF	FF	FF	FF	FF	FF	FF	FF	FF	FF
BepaF2_2_1	FF	FF	FF	FF	FF	FF	FF	FF	FF	FF	FF	FF	FF	FF	FF	MF	MM	MM	MM	MM	MM	MM	MM	MM	MM	MM	MM	MM	MM	MM	MM	MM	MM	MM	MM	MM	MM	MM	MM	MM	MM	MM	MM	MM	MM	MM	MM	MM	MM
BepaF2_2_2	MF	MF	MF	MF	MF	MF	MF	MF	MF	MF	MF	MF	MF	MM	MM	MM	MM	MM	MM	MF	MF	MF	MF	MF	MF	MF	MF	MF	MF	MF	MF	MF	MF	MF	MF	MF	MF	MF	MF	MF	MF	MF	MF	MF	MF	MF	MF	MF	MF
BepaF2_2_3	MF	MF	MF	MF	MF	MF	MF	MF	MF	MF	MF	MF	MF	MF	FF	FF	FF	FF	FF	FF	FF	FF	FF	FF	FF	FF	FF	FF	FF	FF	FF	FF	FF	FF	FF	FF	FF	FF	FF	FF	FF	FF	FF	FF	FF	FF	FF	FF	FF
BepaF2_2_4	FF	FF	FF	FF	FF	FF	FF	FF	FF	FF	notMM	FF	FF	FF	FF	FF	FF	FF	FF	MF	MF	MF	MF	MF	MF	MF	MF	MF	MF	MF	MF	MF	MF	MF	MF	MF	MF	MF	MF	MF	MF	MF	MF	MF	MF	FF	FF	FF	FF
BepaF2_2_5	notFF	MF	MF	MF	MF	MF	MF	MF	notFF	notFF	MF	MF	MF	MF	MF	MF	MF	MF	MF	MF	MF	MF	MF	MF	MF	MF	MF	MF	MF	MF	MF	MF	MF	MF	MF	MF	MF	MF	MF	MF	MF	MF	FF	FF	FF	FF	notMM	FF	FF
BepaF2_2_6	MF	MF	MF	MF	MF	MF	MF	MF	MF	MF	MF	MF	MF	MM	MM	MM	MM	MM	MM	MM	MM	MM	MM	MM	MM	MM	MM	MM	MM	MM	MM	MM	MM	MM	MM	MM	MM	MM	MM	MM	MM	MM	MM	MM	MM	MM	MM	MM	MM
BepaF2_2_7	MF	MF	MF	MF	MF	MF	MF	MF	MF	MF	MF	MF	MF	MF	MF	MF	MF	MF	MF	MF	MM	MF	MF	MF	MF	MF	MF	MF	MF	MF	MF	MF	MF	MF	MF	MF	MF	MF	MF	MF	MF	MF	MF	MF	MF	MF	MF	MF	MF
BepaF2_2_8	notFF	MM	notFF	MM	MM	MF	MF	MF	MF	MF	notFF	MF	MF	MF	FF	FF	notMM	FF	FF	FF	notMM	FF	FF	FF	FF	FF	FF	FF	FF	FF	FF	FF	FF	notMM	FF	FF	FF	FF	FF	FF	FF	FF	FF	FF	FF	FF	notMM	FF	FF
BepaF2_2_9	MM	MM	MM	MM	MM	MM	MM	MM	MM	MF	MF	MF	MF	MF	MF	MF	MF	MF	MF	MF	MF	MF	MF	MF	MF	MF	MF	MF	MF	MF	MF	MF	MF	MF	MF	MF	MF	MF	MF	MF	MF	MF	MF	MF	MF	MF	MF	MF	MF
BepaF2_2_10	MF	MF	MF	MF	MF	MF	MF	MF	MF	MF	MF	MF	MF	MF	MF	MF	MF	MF	MF	MF	MF	MF	MF	MF	MF	MF	MF	MF	MF	MF	MF	MF	MF	MF	MF	MF	MF	MF	MF	MF	MF	MF	MF	MF	MF	MF	MF	MF	MF
BepaF2_2_11	MF	MF	MF	MF	MF	MF	MF	MF	MF	MF	MF	MF	MF	MF	MF	MF	MF	MF	MF	MF	MM	MF	MF	MF	MF	MF	MF	MF	MF	MF	MF	MF	MF	MF	MM	MM	MM	MM	MM	MM	MM	MM	MM	MM	MM	MM	MM	MM	MM
BepaF2_2_12	FF	FF	FF	FF	FF	FF	FF	FF	FF	FF	FF	FF	FF	FF	FF	FF	FF	FF	FF	FF	FF	FF	FF	FF	FF	FF	FF	FF	FF	FF	FF	FF	FF	FF	FF	FF	FF	FF	FF	FF	FF	FF	FF	FF	FF	FF	FF	FF	FF
BepaF2_2_13	FF	FF	FF	FF	FF	FF	FF	FF	FF	FF	notMM	FF	FF	FF	FF	FF	FF	FF	FF	FF	FF	FF	FF	FF	FF	FF	FF	FF	FF	FF	FF	FF	FF	FF	FF	FF	FF	FF	FF	FF	FF	FF	FF	MF	MF	MF	MF	MF	MF
BepaF2_2_14	MF	MF	MF	MF	MF	MF	MF	MF	MF	MF	MF	MF	MF	MF	MF	MF	MF	MF	MF	MF	MF	MF	MF	MF	MF	MF	MF	MF	MF	MF	MF	MF	MF	MF	MF	MF	MF	MF	MF	MF	MF	MF	MF	MF	MF	MF	MF	MF	MF
BepaF2_2_15	MF	MF	MF	MF	MF	FF	FF	FF	FF	FF	notMM	FF	FF	FF	FF	MF	MF	MF	MF	MF	MF	MF	MF	MF	MF	MF	MF	MF	MF	MF	MF	MF	MF	MF	MF	MF	MF	MF	MF	MF	MF	MF	MF	MF	MF	MF	MM	MF	MF
BepaF2_2_16	MF	MF	notFF	MF	MF	MF	MF	MF	MF	notFF	NA	MF	MF	MF	MF	MF	notMM	FF	FF	FF	FF	FF	FF	FF	FF	FF	FF	FF	FF	FF	FF	FF	FF	FF	FF	FF	FF	FF	FF	FF	FF	FF	FF	FF	FF	FF	FF	FF	FF
BepaF2_2_17	FF	FF	notMM	FF	FF	FF	FF	FF	FF	FF	FF	FF	FF	FF	FF	FF	FF	FF	FF	FF	FF	FF	FF	FF	FF	FF	FF	FF	FF	FF	FF	FF	FF	FF	FF	FF	FF	FF	MF	MF	MF	MF	MF	MF	MF	MF	notMM	MF	MF
BepaF2_2_18	MF	MF	MF	MF	MF	MF	MF	MF	MF	MF	MM	MF	MF	MF	MF	MF	MF	MF	MF	MF	MF	MF	MF	MF	MF	MF	MF	MF	MF	MF	MF	MF	MF	MF	MF	MF	MF	MF	MF	MF	MF	MF	MF	MF	MF	MF	MF	MF	MF
BepaF2_2_19	FF	FF	FF	FF	FF	FF	FF	FF	FF	FF	FF	FF	FF	FF	FF	FF	MF	MF	MF	MF	MF	MF	MF	MF	MF	MF	MF	MF	MF	MF	MF	MF	MF	MF	MF	MF	FF	FF	FF	FF	FF	FF	FF	FF	FF	FF	FF	FF	FF
BepaF2_2_20	MF	MF	MF	MF	MF	MF	MF	MF	MF	MF	MF	MM	MM	MM	MM	MM	MM	MM	MM	MM	MM	MM	MM	MM	MM	MM	MM	MM	MM	MF	MM	MF	MM	MM	MF	MF	MF	MF	MF	MF	MF	MF	MF	MF	MF	MF	MF	MF	MF
BepaF2_2_21	MM	MM	MM	MM	MM	MM	MM	MM	MM	MM	MM	MM	MF	MF	MF	MF	MF	MF	MF	MF	MF	MF	MF	MF	MF	MF	MF	MF	MF	MF	MF	MF	MF	MF	MF	MF	MF	MF	MF	MF	FF	FF	FF	FF	FF	FF	FF	FF	FF
BepaF2_2_22	MM	MM	MM	MM	MM	MF	FF	FF	FF	FF	FF	FF	FF	FF	FF	FF	FF	FF	FF	FF	FF	FF	FF	FF	FF	FF	FF	FF	FF	FF	FF	FF	FF	FF	FF	FF	FF	FF	FF	FF	FF	MF	MF	MF	MF	MF	MF	MF	FF
BepaF2_2_23	MM	MM	notFF	MM	MM	MM	MM	MM	MM	MM	notFF	MM	MM	MM	MM	MM	MM	MF	MF	MF	MF	MF	MF	FF	MF	MF	MF	MF	MF	FF	FF	FF	MF	MF	FF	FF	FF	FF	FF	FF	FF	FF	FF	FF	FF	FF	FF	FF	MF
BepaF2_2_24	MF	MF	MF	MF	MF	MF	MF	MF	MF	MF	MF	MF	MF	MF	MF	MF	MF	MF	MF	MF	MF	MF	MF	MF	MF	MF	MF	MF	MF	MF	MF	MF	MF	MF	MF	MF	MF	MF	MF	MF	MF	MF	MF	MF	MF	MF	MF	MF	MF
BepaF2_2_25	MF	MF	MF	MF	MF	MF	MF	MF	MF	MF	notFF	MF	MF	MF	MF	MF	MF	MF	MF	MF	MF	MF	MF	MF	MF	MF	MF	MF	MF	MF	MF	MF	MF	MF	MF	MF	MF	MF	MF	MM	MM	MM	MM	MM	MM	MM	MM	MM	MM
BepaF2_2_26	MF	MF	MF	MF	MF	MF	MF	MF	MF	MF	MF	MF	MF	MM	MM	MM	MM	MM	MM	MM	MM	MM	MM	MM	MM	MM	MM	MM	MM	MM	MM	MM	MM	MM	MM	MF	MF	MF	MF	MF	MF	MF	MF	MF	MF	MF	MF	MF	MF
BepaF2_2_27	FF	FF	FF	FF	FF	FF	FF	FF	FF	FF	MF	MF	MM	MM	MM	MM	MM	MM	MM	MM	MM	MM	MM	MM	MM	MM	MM	MM	MM	MM	MM	MM	MM	MM	MM	MM	MM	MM	MM	MM	MM	MM	MM	MM	MM	MM	MM	MM	MF
BepaF2_2_28	MM	MM	MM	MM	MM	MM	MM	MM	MM	MM	MM	MM	MM	MM	MM	MM	MF	MF	MF	MF	MF	MF	MF	MF	MF	MF	MF	MF	MF	MF	MF	MF	MF	MF	MF	MF	MF	MF	MF	MF	MF	MF	MF	MF	MF	MF	MF	MF	MF
BepaF2_2_29	MF	MF	MF	MF	MF	MF	MF	MF	MF	MF	MF	MF	MF	MF	MF	MF	MF	MF	MF	MF	MF	MF	MF	MF	MF	MF	MF	MF	MF	MF	MF	MF	MF	MF	MF	MF	MF	MF	MF	MF	MF	MF	MF	MF	MF	MF	MF	MF	MF
BepaF2_2_30	MF	MF	NA	MF	MF	MF	MF	notMM	MF	MF	notFF	MM	MM	MM	MM	MM	MM	MM	MM	MM	MM	MM	MM	MM	MM	MM	MM	MM	MM	MM	MM	MM	MM	notFF	MM	MM	MM	MF	MF	MF	MF	MF	MF	MF	MF	MF	notFF	MF	MF
BepaF2_2_31	notFF	notFF	NA	MM	notFF	MM	MM	MM	NA	notFF	NA	MM	MM	MM	MM	MM	MM	notFF	MM	MM	notFF	MM	MM	MM	MM	MM	MM	MM	MM	MM	MM	MM	MM	MM	MM	MM	MM	notFF	MM	notFF	MM	MM	MM	MM	notFF	MF	notFF	notMM	MF
BepaF2_2_32	notFF	MM	NA	MM	MM	MM	MM	MM	notFF	MM	notFF	MM	MM	MM	MM	MM	MF	MF	MF	MF	MF	notMM	MF	MF	MF	MF	MF	MF	MF	MF	MF	MF	MF	MF	MF	MF	notFF	MF	MF	MF	MF	MF	MF	MF	MF	FF	FF	FF	FF
BepaF2_2_33	MM	MM	MM	MM	MM	MM	MM	MM	MM	notFF	notFF	MF	MF	MF	MF	MF	MF	MF	MF	MF	MF	MF	MF	MF	MF	MF	MF	MF	MF	MF	MF	MF	MF	MF	MF	MF	MF	MF	MF	MF	MF	MF	MF	MF	MF	MF	MF	MF	MF
BepaF2_2_34	MF	MF	MF	MF	MF	MF	MF	MF	MF	MF	notMM	FF	FF	FF	FF	FF	FF	MF	MF	MF	MF	MF	MF	MF	MF	MF	MF	MF	MF	MF	MF	MF	MF	MF	MF	MF	MF	MF	MF	MF	MF	MF	MF	MF	MM	MM	MM	MM	MM
BepaF2_2_35	FF	FF	notMM	FF	FF	FF	FF	FF	notMM	FF	NA	FF	FF	FF	MF	MF	MF	MF	MF	notMM	MF	MF	MF	MF	MF	MF	MF	MF	MF	MF	MF	MF	MF	MF	MF	MF	notFF	MF	MF	MF	MF	MF	MF	MF	MF	MF	MM	MF	MF
BepaF2_2_36	MF	MF	MF	MF	MF	MF	MF	MF	MF	MF	MF	MF	MF	MF	MF	MF	MF	MF	MF	MF	MF	MF	MF	MF	MF	MF	MF	MF	MF	MF	MF	MF	MF	MF	MF	MF	MF	MF	MF	MF	MF	MF	MF	MF	MF	MF	MF	MF	MF
BepaF2_2_37	FF	FF	FF	FF	FF	FF	FF	FF	FF	FF	FF	FF	FF	FF	FF	MF	MF	MF	MF	MF	MF	MF	MF	MF	MF	MF	MF	MF	MF	MF	MF	MF	MF	MF	MF	MF	MF	MF	MF	MF	MF	MF	MF	MF	MF	MF	MF	MF	FF
BepaF2_2_38	MF	MF	MF	MF	MF	MF	MF	MF	MF	MF	notFF	MF	MF	MF	MF	MF	MF	MF	FF	FF	FF	FF	FF	FF	FF	FF	FF	FF	FF	FF	FF	FF	FF	FF	FF	FF	FF	MF	MF	MF	MF	MF	MF	MF	MF	MF	MF	MF	MF
BepaF2_2_39	MM	MM	MM	MM	MM	MM	MM	MM	MM	MM	notFF	MM	MM	MM	MF	MF	MF	MF	MF	MF	MF	MF	MF	MF	MF	MF	MF	MF	MF	MF	MF	MF	MF	MF	MF	MF	MF	MF	MF	MF	MF	MF	MF	MF	MF	MF	MF	MF	MF
BepaF2_2_40	MF	MF	MF	MF	MF	MF	MF	MF	MF	MF	MF	MF	MM	MM	MM	MM	MM	MM	MM	MM	MM	MM	MM	MM	MM	MM	MM	MM	MM	MM	MM	MM	MM	MM	MM	MM	MM	MM	MM	MM	MM	MM	MM	MM	MM	MM	MM	MM	MM
BepaF2_2_41	MF	MF	MF	MF	MF	MF	MF	MF	MF	MF	MF	MF	MF	MF	MF	MF	MF	MF	MF	MF	MF	MF	MF	MF	MF	MF	MF	MF	MF	MF	MF	MF	MF	MF	MF	MF	MF	MF	MF	MF	MF	MF	MF	MF	MF	MF	MM	MF	MF
BepaF2_2_42	MF	MF	MF	MF	MF	MF	MF	MF	notFF	MF	MF	MF	MF	MF	MF	MM	MM	MM	MM	MM	MM	MM	MM	MM	MM	MM	MM	MM	MM	MM	MM	MM	MM	MM	MM	MM	MM	MM	MM	MM	MM	MM	MM	MM	MM	MM	MM	MM	MM
BepaF2_2_43	MM	MM	notFF	MM	MM	MF	MF	MF	MF	MF	MF	MF	MF	MF	MF	MF	MF	MF	MF	MF	MF	MF	MF	MF	MF	MF	MF	MF	MF	FF	FF	FF	MF	MF	FF	FF	FF	FF	FF	FF	FF	FF	FF	FF	FF	FF	notMM	FF	FF
BepaF2_2_44	MM	MM	MM	MM	MM	MM	MM	MM	MM	MM	MM	FF	FF	FF	FF	FF	FF	FF	FF	FF	FF	FF	FF	FF	FF	FF	FF	FF	FF	FF	FF	FF	FF	FF	FF	FF	FF	FF	FF	FF	FF	FF	FF	FF	FF	FF	FF	FF	FF
BepaF2_2_45	MF	MF	notMM	MF	MF	MF	MF	MF	MF	MF	notMM	MM	MM	MM	MM	MM	MM	MM	MM	MM	MM	MM	MM	MM	MM	MM	MM	MM	MM	MM	MM	MM	MM	MM	MM	MM	MM	MM	MM	MM	MM	MM	MM	MM	MM	MM	MM	MM	MM
BepaF2_2_46	MF	MF	notMM	MF	MF	MF	MF	FF	FF	MF	MF	MF	MF	MF	MF	MF	MF	MF	MF	MF	MF	MF	MF	MF	MF	MF	MF	MF	MF	MF	MF	MF	MF	MF	MF	MF	MF	MF	MF	MF	MF	MF	MF	MF	MF	MF	MF	MF	MF
BepaF2_2_47	MF	MF	MF	MF	MF	MF	MF	MF	MF	MM	MM	MM	MM	MM	MM	MM	MM	MM	MM	MM	MM	MM	MM	MM	MM	MM	MM	MM	MM	MM	MM	MM	MM	MM	MM	MM	MM	MM	MM	MM	MM	MM	MM	MM	MM	MM	MM	MM	MM
BepaF2_2_48	FF	FF	FF	FF	FF	FF	FF	FF	FF	FF	notMM	FF	FF	FF	FF	FF	FF	FF	FF	FF	FF	FF	FF	FF	FF	FF	FF	FF	FF	FF	FF	FF	FF	FF	FF	MF	MF	MM	MM	MM	MM	MM	MM	MM	MM	MM	MM	MM	MF
BepaF2_2_49	MM	MM	MM	MM	MM	MM	MM	MM	MM	MM	MF	MM	MM	MM	MM	MM	MM	MM	MM	MM	MM	MM	MM	MM	MM	MM	MM	MM	MM	MM	MM	MM	MM	MM	MM	MM	MM	MM	MM	MM	MM	MM	MM	MM	MM	MF	MF	MF	MF
BepaF2_2_50	FF	FF	FF	FF	FF	FF	FF	FF	FF	FF	FF	FF	FF	MF	MF	MF	MF	MF	MF	MF	MF	MF	MF	MF	MF	MF	MF	MF	MF	MF	MF	MF	MF	MF	MF	MF	MF	MF	FF	FF	FF	FF	FF	FF	FF	FF	FF	FF	FF
BepaF2_3_1	FF	FF	FF	FF	FF	FF	FF	FF	FF	FF	notMM	MF	MF	MF	MF	MF	MF	MF	MF	MF	MF	MF	MF	MF	MF	MF	MF	MF	MF	MF	MF	MF	MF	MF	MF	MF	MF	MF	MF	MF	MF	MF	MF	MF	MF	MF	MF	MF	MF
BepaF2_3_2	FF	FF	FF	FF	FF	FF	FF	FF	FF	FF	FF	FF	FF	MF	MF	MF	MF	MF	MF	MF	MF	MF	MF	MF	MF	MF	MF	MF	MF	MF	MF	MF	MF	MF	MF	MF	MF	MF	MF	MF	MF	MF	MF	MF	MF	MF	MF	MF	MF
BepaF2_3_3	MF	MF	MF	MF	MF	MF	MF	MF	MF	MF	MF	MF	MM	MM	MM	MM	MM	MM	MM	MM	MM	MM	MF	MF	MF	MF	MF	MF	MF	MF	MF	MF	MF	MF	MF	MF	MF	MF	MF	MF	MF	MF	MF	MF	MF	MF	MF	MF	MF
BepaF2_3_4	MF	MF	MF	MF	MF	MF	MF	MF	MF	MM	MM	MM	MM	MM	MM	MM	MM	MM	MM	MM	MM	MM	MM	MM	MM	MM	MM	MM	MM	MM	MM	MM	MM	MM	MM	MM	MM	MM	MM	MM	MM	MM	MM	MM	MM	MM	MM	MM	MM
BepaF2_3_5	MM	MM	MM	MM	MM	MM	MM	MM	MM	MM	MM	MM	MM	MM	MM	MM	MM	MM	MM	MM	MM	MM	MM	MM	MM	MM	MM	MM	MM	MM	MM	MM	MM	MM	MM	MM	MM	MM	MM	MM	MM	MM	MM	MM	MM	MM	MM	MM	MM
BepaF2_3_6	MF	MF	MF	MF	MF	MF	MF	MF	MF	MF	MF	MF	MF	MF	MF	MF	MF	MF	MF	MF	MF	MF	MF	MF	MF	MF	MF	MF	MF	MF	MF	MF	MF	MF	MF	MF	MF	MF	MF	MF	MF	MF	MF	MF	MF	MF	notMM	MF	MF
BepaF2_3_7	MM	MM	MM	MM	MM	MM	MM	MM	MM	MF	MF	MF	MF	MF	MF	MF	FF	FF	FF	FF	FF	FF	FF	FF	FF	FF	FF	FF	FF	FF	FF	FF	FF	FF	FF	FF	FF	FF	FF	FF	FF	FF	FF	FF	FF	FF	FF	FF	FF
BepaF2_3_8	MM	MM	MM	MM	MM	MM	MM	MM	MM	MM	notFF	MF	FF	FF	FF	FF	FF	FF	FF	FF	FF	FF	FF	FF	FF	FF	FF	FF	FF	FF	FF	FF	FF	FF	FF	FF	FF	FF	FF	FF	FF	FF	FF	FF	FF	FF	FF	FF	FF
BepaF2_3_9	FF	FF	FF	FF	FF	FF	FF	FF	FF	FF	FF	FF	FF	FF	MF	MF	MF	MF	MF	MF	MF	MF	MF	MF	MF	MF	MF	MF	MF	MF	MF	MF	MF	MF	MF	MF	MF	MF	MF	MF	MF	MF	MF	MF	MF	MF	MF	MF	MF
BepaF2_3_10	MF	MF	MF	MF	MF	MF	MF	MM	MM	MM	notFF	MM	MM	MM	MM	MM	MM	MF	MF	MF	MF	MF	MF	MF	MF	MF	MF	MF	MF	MF	MF	MF	MF	MF	MF	MF	MF	MF	MF	MF	MF	MF	MF	MF	MF	MF	MF	MF	MF
BepaF2_3_11	MF	MF	MF	MF	MF	MF	MF	MF	MF	MF	MF	MF	MF	MF	MF	MF	MF	MF	MF	MF	FF	FF	FF	MF	MF	MF	MF	MF	MF	MF	MF	MF	MF	MF	MF	MF	MF	MF	MF	MF	MF	MF	MF	MF	MF	FF	FF	FF	FF
BepaF2_3_12	MM	MM	MM	MM	MM	MM	MM	MM	MM	MF	MF	MF	MF	MF	FF	FF	FF	FF	FF	FF	FF	FF	FF	FF	FF	FF	FF	FF	FF	FF	FF	FF	FF	FF	FF	FF	FF	FF	FF	FF	FF	FF	FF	FF	FF	FF	FF	FF	FF
BepaF2_3_13	MM	MM	MM	MM	MM	MM	MM	MM	MM	MM	notFF	MM	MM	MM	MM	MM	MM	MM	MM	MM	MM	MM	MM	MM	MM	MM	MM	MM	MM	MM	MM	MM	MM	MM	MM	MM	MM	MM	MM	MM	MM	MM	MM	MM	MM	MM	MM	MM	MM
BepaF2_3_14	MM	MM	MM	MM	MM	MM	MM	MM	MM	MM	MM	MM	MM	MM	MM	MM	MF	MF	MF	MF	MF	MF	MF	MF	MF	MF	MF	MF	MF	MF	MF	MF	MF	MF	MF	MF	MF	MF	MF	MF	MF	MF	MF	MF	MF	MF	MF	MF	MF
BepaF2_3_15	MF	MF	MF	MF	MF	MF	MF	MF	MF	MF	MF	MF	MF	MF	MF	MF	MF	MF	MF	MF	MF	MF	MF	MF	MF	MF	MF	MF	MF	MF	MF	MF	MF	MF	MF	MF	MF	MF	MF	MF	MF	MF	MF	MF	MF	MF	MF	MF	MF
BepaF2_3_16	MM	MM	notFF	MM	MM	MM	MM	MM	MM	MM	notFF	MM	MM	MM	MM	MM	MM	MM	MM	MM	MM	MM	MM	MM	MM	MM	MM	MM	MM	MM	MM	MM	MM	MM	MM	MM	MM	MM	MM	MM	MM	MM	MM	MM	MM	MM	notFF	MM	MM
BepaF2_3_17	FF	FF	FF	FF	FF	FF	FF	FF	FF	FF	notMM	MF	MF	MF	MF	MF	MF	MF	MF	MF	MF	MF	MF	MF	MF	MF	MF	MF	MF	MF	MF	MF	MF	MF	MF	MF	MF	MF	MF	MF	MF	MF	MF	MF	MF	MF	notMM	MF	MF
BepaF2_3_18	MF	MF	MF	MF	MF	MF	MF	MF	MF	MF	MF	MF	MF	MF	MM	MM	MM	MM	MM	MM	MM	MM	MM	MM	MM	MM	MM	MM	MM	MM	MM	MM	MM	MM	MM	MM	MM	MF	MF	MF	MF	MF	MF	MF	MF	MF	notFF	MF	MF
BepaF2_3_19	MF	MF	MF	MF	MF	MF	MF	MF	MF	MF	notFF	MF	MF	MF	MF	MF	MF	MF	MF	MF	MF	MF	MF	MF	MF	MF	MF	MF	MF	MF	MF	MF	MF	MF	MF	MF	MF	MF	MF	MF	MF	MF	MF	MF	MF	MF	MF	MF	MF
BepaF2_3_20	MF	MF	MF	MF	MF	MF	MF	MF	MF	MF	notFF	MF	MF	MF	MF	MF	MF	MF	MM	MM	MM	MM	MM	MM	MM	MM	MM	MM	MM	MM	MM	MM	MM	MM	MM	MM	MM	MM	MM	MM	MM	MM	MM	MM	MM	MM	MM	MM	MM
BepaF2_3_21	FF	FF	FF	FF	FF	FF	FF	FF	FF	FF	notMM	FF	FF	FF	FF	FF	FF	FF	FF	FF	FF	FF	FF	FF	FF	FF	FF	FF	FF	FF	FF	FF	FF	FF	FF	FF	FF	FF	FF	FF	FF	FF	FF	FF	FF	FF	FF	FF	FF
BepaF2_3_22	MM	MM	notFF	MM	MM	MM	MM	MM	MM	MM	notFF	MF	MF	MF	MF	MF	MF	MF	MF	MF	MF	MF	MF	MF	MF	MF	MF	MF	MF	MF	MF	MF	MF	MF	MF	MF	MF	MF	MF	MF	MF	MF	MF	MF	MF	MF	MF	MF	MF
BepaF2_3_23	MM	MM	MM	MM	MM	MM	MM	MM	MM	MM	MM	MM	MM	MM	MM	MF	MF	MF	MF	MF	MF	MF	MF	MF	MF	MF	MF	MF	MF	MF	MF	MF	MF	MF	MF	MF	MF	MF	MF	MF	MF	MF	MF	MF	MF	MF	MF	MF	MF
BepaF2_3_24	MF	MF	MF	MF	MF	MF	MF	MF	MF	MF	MF	MF	MF	MF	MF	MF	MF	MF	MF	MF	MF	MF	MF	MF	MF	MF	MF	MF	MF	MF	MF	MF	MF	MF	MF	MF	MF	MF	MF	MF	MF	MF	MF	MF	MF	MF	MF	MF	MF
BepaF2_3_25	MF	MF	MF	MF	MF	MF	MF	MF	MF	MF	notFF	MF	MF	MF	MF	MF	MF	MF	MF	MF	MF	MF	MF	MF	MF	MF	MF	MF	MF	MF	MF	MF	MF	MF	MF	MF	MF	MF	MF	MF	MF	MF	MF	MF	MF	MF	MF	MF	MF
BepaF2_3_26	MM	MM	MM	MM	MM	MM	MM	MM	MM	MM	notFF	MM	MM	MM	MF	MF	MF	MF	MF	MF	MF	MF	MF	MF	MF	MF	MF	MF	MF	MF	MF	MF	MF	MF	MF	MF	MF	MM	MM	MM	MM	MM	MM	MM	MM	MM	MM	MM	MM
BepaF2_3_27	MF	MF	notFF	MF	MF	MF	MF	FF	FF	FF	notMM	FF	FF	FF	FF	FF	FF	FF	FF	FF	FF	FF	FF	FF	FF	FF	FF	FF	FF	FF	FF	FF	FF	FF	FF	FF	FF	FF	FF	MF	MF	MF	MF	MF	MF	MF	notMM	MF	MF
BepaF2_3_28	MF	MF	MF	MF	MF	MF	MF	MF	MF	MF	MF	MM	MF	MF	MF	MF	MF	MF	MF	MF	MF	MF	MF	MF	MF	MF	MF	MF	MF	MF	MF	MF	MF	MF	MF	MF	MF	MF	MF	MF	MF	MF	MF	MF	MF	MF	MF	MF	MF
BepaF2_3_29	MF	MF	notMM	MF	MF	MF	MF	MF	MF	MF	MF	MF	FF	FF	FF	FF	FF	FF	FF	FF	FF	FF	FF	MF	MF	MF	MF	MF	MF	MF	MF	MF	MF	MF	MF	MF	MF	MF	MF	MF	MF	MF	MF	MF	MF	FF	FF	FF	FF
BepaF2_3_30	MM	MM	notFF	MM	MM	MM	MM	MM	MM	MM	MM	MM	MM	MM	MM	MM	MM	MM	MM	MM	MM	MM	MM	MM	MM	MM	MM	MM	MM	MM	MM	MM	MM	MM	MM	MM	MM	MM	MM	MM	MM	MM	MM	MM	MM	MF	MF	MF	MF
BepaF2_3_31	MF	MF	MF	MF	MF	MF	MF	MF	MF	MF	MF	MF	MF	MF	MF	MF	MF	MF	MF	MF	MF	MF	MF	MF	MF	MF	MF	MF	MF	MF	MF	MF	MF	MF	MF	MF	MF	MF	MF	MF	MF	MF	MF	MF	MF	MF	MF	MF	MF
BepaF2_3_32	MF	MF	MF	FF	FF	FF	FF	FF	FF	FF	notMM	FF	FF	MF	MF	MF	MF	MF	MF	MF	MF	MF	MF	MF	MF	MF	MF	MF	MF	MF	MF	MF	MF	MF	MF	MF	MF	MF	MF	MF	MF	MF	MF	MF	MF	MF	MF	MF	MF
BepaF2_3_34	MM	MM	notFF	MM	MM	MF	MF	MF	MF	MF	notMM	MF	MF	MF	MF	MF	MF	MF	MF	MF	MF	MF	MF	MF	MF	MF	MF	MF	MF	MF	MF	MF	MF	MF	MF	MF	MF	MF	MF	MF	MF	MF	MF	MF	MF	MF	MF	MF	MF
BepaF2_3_35	FF	FF	notMM	FF	FF	FF	FF	FF	FF	FF	notMM	MF	MF	MF	MF	MF	MF	MF	MF	MF	MF	MF	MF	MF	MF	MF	MF	MF	MF	MF	MF	MF	MF	MF	MF	MF	MF	MF	MF	MF	MF	MF	MF	MF	MF	MF	MF	MF	MF
BepaF2_3_36	MF	MF	MF	MF	MF	MF	MF	MF	MF	MF	MF	MF	MF	MF	MF	MF	MF	MF	MF	MF	MF	MF	MF	MF	MF	MF	MF	MF	MF	MF	MF	MF	MF	MF	MF	MF	MF	MF	MF	MF	MF	MF	MF	MF	MF	MF	MF	MF	MF
BepaF2_3_37	MF	MF	MF	MF	MF	MF	MF	MM	MM	MM	MM	MM	MM	MM	MM	MM	MM	MM	MM	MF	MF	MF	MF	MF	MF	MF	MF	MF	MF	MF	MF	MF	MF	MF	MF	MF	MF	MF	MF	MF	MF	MF	MF	MF	MF	MF	MF	MF	MF
BepaF2_3_38	MF	MF	notMM	MF	MF	MF	MF	MF	MF	MF	MF	MF	MF	MF	MM	MM	MM	MM	MM	MM	MM	MM	MM	MM	MM	MM	MM	MM	MM	MM	MM	MM	MM	MM	MM	MM	MM	MM	MM	MM	MM	MM	MM	MM	MM	MM	MM	MM	MM
BepaF2_3_40	MM	MM	MM	MM	MM	MM	MM	MM	MM	MM	notFF	MM	FF	FF	FF	FF	FF	FF	FF	FF	FF	FF	FF	FF	FF	FF	FF	FF	FF	FF	FF	FF	FF	FF	FF	FF	FF	FF	FF	FF	FF	FF	FF	FF	FF	FF	FF	FF	FF
BepaF2_3_42	FF	FF	FF	FF	FF	FF	FF	FF	FF	FF	FF	FF	FF	FF	FF	FF	FF	FF	FF	FF	FF	FF	FF	FF	FF	FF	FF	FF	FF	FF	FF	FF	FF	FF	FF	FF	FF	FF	FF	FF	FF	FF	FF	FF	FF	FF	FF	FF	FF
BepaF2_3_43	MF	MF	MF	MF	MF	MF	MF	MF	MF	MM	MM	MM	MM	MM	MM	MM	MM	MM	MM	MM	MM	MM	MM	MM	MM	MM	MM	MM	MM	MM	MM	MM	MM	MM	MM	MM	MM	MM	MM	MM	MM	MM	MM	MM	MM	MM	MM	MM	MM
BepaF2_3_44	FF	FF	FF	FF	FF	FF	FF	FF	FF	FF	FF	FF	FF	FF	FF	FF	FF	FF	FF	FF	FF	FF	FF	FF	FF	FF	FF	FF	FF	FF	FF	FF	FF	FF	FF	FF	FF	FF	FF	FF	FF	FF	FF	FF	FF	FF	FF	FF	FF
BepaF2_3_46	MF	MF	MF	MF	MF	FF	FF	FF	FF	FF	FF	FF	FF	FF	FF	FF	FF	FF	FF	FF	FF	FF	FF	FF	FF	FF	FF	FF	FF	FF	FF	FF	FF	FF	FF	FF	FF	FF	FF	FF	FF	FF	MF	MF	MF	MF	MF	MF	MF
BepaF2_3_47	MF	MF	MF	MF	MF	MF	MF	MF	MM	MM	notFF	MM	MM	MM	MM	MM	MM	MM	MM	MM	MM	MM	MM	MM	MM	MM	MM	MM	MM	MM	MM	MM	MM	MM	MM	MM	MM	MM	MM	MM	MM	MM	MM	MM	MM	MM	MM	MM	MM
BepaF2_3_48	FF	FF	FF	FF	FF	FF	FF	FF	FF	FF	FF	FF	FF	FF	FF	FF	FF	FF	FF	FF	FF	FF	FF	FF	FF	FF	FF	FF	FF	FF	FF	FF	FF	FF	FF	FF	FF	MF	MF	MF	MF	MF	MF	MF	MF	MF	MF	MF	MF
BepaF2_3_49	MF	MF	MF	MF	MF	MF	MF	MF	MF	MF	notMM	FF	FF	FF	FF	FF	FF	FF	FF	FF	FF	FF	FF	FF	FF	FF	FF	FF	FF	FF	FF	FF	FF	FF	FF	FF	FF	FF	FF	FF	MF	MF	MF	MF	MF	MF	MF	MF	MF
BepaF2_4_1	FF	notMM	notMM	FF	FF	FF	FF	FF	notMM	notMM	NA	FF	FF	MF	MF	MF	MF	MF	MF	MF	MM	notFF	MM	MM	MM	MM	MM	MM	MM	MM	MM	MM	MM	notFF	MM	MM	notFF	MM	MM	MM	MM	MM	MM	MF	MF	MF	MM	notMM	MF
BepaF2_4_2	notMM	MF	NA	MF	notMM	MF	notMM	NA	notMM	notFF	notFF	MF	MF	MF	MF	MF	notFF	MF	MF	MF	MF	MF	MF	FF	MF	MF	MF	MF	MF	MF	notFF	MF	MF	MF	notFF	MF	notMM	MF	MF	notMM	MF	MM	MM	MM	notFF	notFF	NA	MM	MM
BepaF2_4_3	notMM	MF	NA	MF	MF	MF	MF	MF	notMM	notFF	NA	MF	notMM	MF	MF	MF	MF	MF	MF	MF	notMM	MF	NA	MF	MF	MF	MF	MF	MF	MF	MF	MF	MF	notFF	MF	MF	MF	notFF	MF	notMM	MF	FF	MF	MF	MF	MF	MF	MF	notMM
BepaF2_4_4	notFF	MF	notMM	MF	notMM	MF	MF	MF	MF	notFF	NA	MF	MF	MF	MF	MF	MF	MF	MF	MF	MF	MF	MF	MF	MF	MF	MF	MF	MF	MF	MF	MF	MF	notMM	MF	MF	MF	MF	MF	MF	MF	MF	MF	MF	notMM	MF	notFF	MF	MF
BepaF2_4_5	MF	MF	notFF	MF	MF	MF	MF	MF	MF	MF	notMM	FF	FF	FF	MF	MF	MF	MF	MF	MF	MF	MF	MF	MF	MF	MF	MF	MF	MF	MF	MF	MF	MF	notMM	MF	MF	MF	MF	MF	MF	MF	MF	MF	MF	MF	MF	MF	MF	MF
BepaF2_4_6	notMM	MF	notFF	MF	MF	MF	MF	MF	notMM	MF	NA	MF	MM	MM	MM	MM	MM	MM	MM	notFF	notFF	MM	MM	MM	MM	MM	MM	MM	MF	MM	notFF	MM	MM	notFF	MM	MM	notFF	notFF	MF	MF	MF	MF	MF	MM	notMM	notFF	notFF	MF	MF
BepaF2_4_7	MF	MF	notMM	MF	MF	MF	MF	MF	notMM	MF	notMM	FF	FF	FF	FF	FF	FF	FF	FF	FF	FF	FF	FF	FF	FF	FF	FF	FF	FF	FF	FF	FF	FF	FF	FF	FF	FF	FF	FF	FF	FF	FF	FF	FF	FF	FF	FF	FF	FF
BepaF2_4_8	FF	FF	notMM	FF	FF	FF	FF	FF	FF	FF	notMM	FF	FF	FF	FF	FF	FF	FF	FF	FF	FF	FF	FF	FF	FF	FF	FF	FF	FF	FF	FF	FF	FF	FF	FF	FF	FF	FF	FF	FF	FF	FF	FF	FF	FF	FF	FF	FF	FF
BepaF2_4_9	MF	MF	notFF	MF	MF	MF	MF	MF	MF	notFF	NA	MF	MF	MF	MF	MF	MF	MF	MF	MF	MF	MF	MM	MM	MM	MM	MM	MM	MM	MM	MM	MM	MM	MM	MM	MM	MM	MM	MM	MM	MM	MM	MM	MM	MM	MM	MM	MM	MM
BepaF2_4_10	FF	FF	notMM	FF	FF	FF	FF	FF	notMM	notMM	notMM	FF	FF	MF	MF	MM	MM	MM	MM	MM	MM	MM	MM	MM	MM	MM	MM	MM	MM	MM	MM	MM	MM	MM	MM	MM	MM	MM	MM	MM	MM	MM	MM	MM	MM	MM	MM	MM	MM
BepaF2_4_11	MM	MM	notFF	MM	MM	MM	MM	MM	MM	MM	notFF	MM	MM	MF	MF	MF	MF	MF	MF	MF	MF	MF	MF	MF	MF	MF	MF	MF	MF	MF	MF	MF	MF	MF	MF	MF	MF	MF	MF	MF	notMM	FF	FF	FF	FF	FF	FF	FF	FF
BepaF2_4_12	MF	MF	MF	MF	MF	FF	FF	FF	FF	FF	FF	FF	FF	FF	FF	FF	FF	FF	FF	FF	FF	FF	FF	FF	FF	FF	FF	FF	FF	FF	FF	FF	FF	FF	FF	FF	FF	FF	FF	FF	FF	FF	FF	FF	FF	FF	FF	FF	FF
BepaF2_4_13	FF	FF	notMM	FF	FF	FF	FF	MF	MF	notMM	MM	MF	MF	MF	MF	MF	MF	MF	MF	MF	MF	MF	MF	MF	MF	MF	MF	MF	MF	MF	MF	MF	MF	MF	MF	MF	MF	MF	MF	MF	MF	MF	MF	MF	MF	MF	notFF	MF	MF
BepaF2_4_14	notMM	MF	MF	MF	MF	MF	MF	notFF	notFF	notFF	notFF	MM	MM	MM	MM	MM	MM	MM	MM	MM	MM	MM	MM	MM	MM	MM	MM	MM	MM	MM	MM	MM	MM	MM	MM	MM	MM	MM	MM	MF	MF	MF	MF	MF	MF	MF	notFF	MF	MF
BepaF2_4_15	FF	FF	NA	FF	FF	FF	FF	FF	notMM	FF	notMM	FF	FF	FF	FF	FF	FF	FF	FF	FF	FF	FF	FF	FF	FF	FF	FF	FF	FF	FF	FF	FF	FF	FF	FF	FF	FF	FF	FF	FF	FF	FF	FF	FF	FF	FF	notMM	FF	FF
BepaF2_4_16	notFF	MF	NA	MF	MF	notFF	notMM	notMM	NA	NA	notMM	notFF	notFF	MM	MF	MF	NA	notMM	notFF	MF	notMM	notMM	NA	notFF	MF	notFF	notMM	MF	MF	MF	MF	notFF	MF	NA	MF	notMM	notMM	NA	notMM	notFF	notMM	NA	notMM	notMM	notMM	notMM	NA	FF	notMM
BepaF2_4_17	MM	MM	notFF	MM	MM	MM	MM	MM	MM	MF	MF	MF	MF	MF	MF	MF	MF	MF	MF	MF	MF	notMM	FF	FF	FF	FF	FF	FF	FF	FF	FF	FF	FF	FF	FF	FF	FF	FF	FF	FF	FF	FF	FF	FF	FF	FF	FF	FF	FF
BepaF2_4_18	MF	MF	MF	MF	MF	MF	MF	MF	MF	MF	notMM	MF	MF	MF	MF	MF	MF	MF	MF	MF	MF	MF	MF	MF	MF	MF	MF	MF	MF	MF	MF	MF	MF	MF	MF	MF	MF	MF	MF	MF	MF	MF	MF	MF	MF	MF	notMM	MF	MF
BepaF2_4_19	MF	MF	notFF	MF	MF	MF	MF	MF	MF	notFF	MF	MF	MF	MF	MF	MF	MF	MF	MF	MF	MF	MF	MF	MF	MF	MF	MF	MF	MF	MF	MF	MF	MF	MF	MF	MF	MF	MF	MF	MF	MF	MF	MF	MF	MF	MF	MF	MF	MF
BepaF2_4_20	notMM	notMM	notMM	MF	MF	MF	MF	MF	MF	MF	NA	MF	FF	FF	FF	FF	FF	FF	FF	FF	FF	FF	FF	FF	FF	FF	FF	FF	FF	FF	FF	FF	FF	notMM	FF	FF	FF	notMM	FF	FF	FF	FF	FF	FF	FF	FF	notMM	notMM	FF
BepaF2_4_21	notFF	MM	NA	MM	MM	MM	MM	MM	MM	notFF	notFF	MM	MM	MM	MM	MM	MM	MM	MM	MM	MM	MM	MM	MM	MM	MM	MM	MM	MM	MM	MM	MM	MM	MM	MM	MM	MM	notFF	MF	MF	MF	MF	MF	MF	notMM	MF	notMM	MF	MF
BepaF2_4_22	MF	MF	notFF	MF	MF	MF	MF	MF	MF	MM	MF	MM	MF	MF	MF	MF	MF	MF	MF	MF	MF	MF	MF	FF	MF	MF	MF	MF	MF	MF	MF	MF	MF	MF	MF	MF	MF	MF	FF	FF	FF	FF	FF	FF	FF	FF	notMM	notMM	FF
BepaF2_4_23	MF	MF	notFF	MF	MF	MF	MF	MF	MF	MF	MF	MF	MM	MM	MM	MM	MM	MM	MM	MM	MM	MM	MM	MM	MM	MM	MM	MM	MM	MM	MM	MM	MM	MM	MM	MM	MM	MM	MM	MM	MM	MF	MF	MF	MF	notFF	MF	MF	MF
BepaF2_4_24	FF	FF	notMM	FF	FF	FF	FF	FF	notMM	FF	notMM	FF	FF	FF	FF	FF	FF	FF	FF	FF	FF	FF	FF	FF	FF	FF	FF	FF	FF	FF	FF	FF	FF	FF	FF	FF	FF	FF	FF	FF	FF	FF	FF	FF	FF	FF	FF	FF	FF
BepaF2_4_25	MF	MF	notFF	MF	MF	MF	MF	FF	FF	FF	NA	FF	FF	FF	FF	FF	FF	FF	FF	MF	MF	MF	MF	MF	MF	MF	MF	MF	MF	MF	MF	MF	MF	MF	MF	MF	MF	MF	MF	MF	FF	FF	FF	FF	FF	FF	notMM	FF	FF
BepaF2_4_26	MF	MF	MF	MF	MF	MF	MF	MF	MF	MF	notFF	MF	MF	MF	MF	MF	MF	MF	MF	MF	MF	MF	MF	MF	MF	MF	MF	MF	MF	MF	MF	MF	MF	MF	MF	MF	MF	MF	MF	MF	FF	FF	FF	FF	FF	FF	FF	FF	FF
BepaF2_4_27	MF	MF	MF	MF	MF	MF	MF	MM	MM	MM	MM	MM	MM	MM	MM	MM	MM	MM	MM	MM	MM	MM	MM	MM	MM	MM	MM	MM	MM	MM	MM	MM	MM	MM	MM	MM	MM	MM	MF	MF	MF	MF	MF	MF	MF	MF	MF	MF	MF
BepaF2_4_28	MF	MF	NA	MF	MF	MF	MF	MF	notMM	MF	notFF	MF	MF	MF	MF	MF	MF	MF	MF	MF	MF	MF	MF	MF	MF	MF	MF	MF	MF	MF	MF	MF	MF	MF	MF	MF	MF	MF	MF	MF	MF	MF	MF	MF	MF	MF	MF	MF	MF
BepaF2_4_29	MF	MF	MF	MF	MF	MM	MM	MM	MM	notFF	notFF	MM	MM	MM	MM	MF	MF	MF	MF	MF	MF	MF	MF	MF	MF	MF	MF	MF	MF	MF	MF	MF	MF	MF	MF	MF	MF	MF	MF	MF	MF	MF	MF	MF	MF	MF	MF	MF	MF
BepaF2_4_30	notFF	MM	notFF	MM	MM	MM	MM	MM	notFF	notFF	notFF	MM	MM	MM	MM	MM	MM	MM	MM	MM	MM	MM	MM	MM	MM	MM	MM	MM	MM	MM	MM	MM	MM	MM	MM	MM	MM	MM	MM	MM	MM	MM	MM	MF	MM	MF	notFF	MF	MF
BepaF2_4_31	MF	MF	MF	MF	MF	MF	MF	MF	MF	notFF	notFF	MF	MF	FF	FF	FF	FF	FF	FF	FF	FF	FF	notMM	FF	FF	FF	FF	FF	FF	FF	FF	FF	FF	FF	FF	FF	FF	FF	FF	FF	FF	FF	FF	FF	FF	FF	notMM	FF	FF
BepaF2_4_32	FF	FF	notMM	FF	FF	FF	FF	FF	FF	FF	FF	FF	MF	MF	MF	MF	MM	MM	MM	MM	MM	MM	MM	MM	MM	MM	MM	MM	MM	MM	MM	MM	MM	MM	MM	MM	MF	MF	MF	MF	MF	MF	MF	MF	MF	MF	MF	MF	MF
BepaF2_4_33	notFF	MM	notFF	MM	MF	MF	MF	MF	MF	notMM	MF	MF	MF	FF	FF	FF	FF	FF	FF	FF	FF	FF	FF	FF	FF	FF	FF	FF	FF	FF	FF	FF	FF	FF	FF	FF	FF	FF	FF	FF	FF	FF	FF	FF	FF	FF	notMM	FF	FF
BepaF2_4_34	MM	MM	notFF	MM	MM	MF	MF	MF	MF	notFF	MF	MF	MF	MF	MF	MF	MF	MF	MF	MF	MF	MF	MF	MF	MF	MF	MF	MF	MF	MF	MF	MF	MF	MF	MF	MF	MF	FF	FF	FF	FF	FF	FF	FF	FF	FF	notMM	FF	FF
BepaF2_4_35	FF	FF	notMM	FF	FF	FF	FF	notMM	FF	FF	notMM	FF	FF	FF	FF	FF	MF	MF	MF	MF	MF	MF	MF	MF	MF	MF	MF	MF	MF	MF	MF	MF	MF	MF	MF	MF	MF	MF	MF	MF	MF	MF	MF	MF	MF	MF	MF	MF	MF
BepaF2_4_36	MF	MF	MF	MF	MF	MF	MF	MM	notFF	notFF	notFF	MF	MF	MF	MF	MF	MF	MF	MF	MF	MF	notMM	notMM	MF	MF	MF	MF	MF	MF	MF	MF	MF	MF	MF	MF	MF	MF	MF	MF	MF	MF	MF	MF	MF	MF	MF	NA	MF	MF
BepaF2_4_37	FF	FF	notMM	FF	FF	FF	FF	FF	notMM	MF	notFF	MF	MF	MM	MM	MM	MM	MM	MM	MM	MM	MM	MM	MM	MM	MM	MM	MM	MM	MM	MM	MM	MM	MM	MM	MM	MM	MM	MM	MM	MM	MM	MM	MM	MM	MM	MM	MM	MM
BepaF2_4_38	MF	MF	MF	notMM	MF	MF	MF	MF	MF	MF	notMM	FF	FF	FF	FF	FF	FF	FF	FF	FF	FF	FF	FF	FF	FF	FF	FF	FF	FF	FF	FF	FF	FF	notMM	FF	FF	FF	FF	FF	FF	FF	FF	FF	MF	MF	MF	notFF	MF	MF
BepaF2_4_39	notMM	FF	notMM	FF	FF	FF	FF	FF	FF	FF	notMM	FF	MF	MF	MF	MF	MF	MF	notFF	MF	MM	MM	MM	MM	MM	MM	MM	MM	MM	MM	MM	MM	MM	notFF	MM	MM	MM	MM	MM	MM	MM	MM	MM	MM	MM	MM	MM	MM	MM
BepaF2_5_1	notMM	FF	notMM	FF	FF	FF	FF	MF	notMM	notMM	notMM	FF	FF	FF	FF	FF	FF	notMM	MF	MF	MF	MF	MF	MF	MF	MF	MF	MF	MF	MF	MF	MF	MF	MF	MF	MF	MF	MF	MF	MF	FF	FF	FF	FF	FF	FF	notMM	FF	FF
BepaF2_5_2	notMM	MF	MF	MF	MF	MF	FF	FF	notMM	notMM	notMM	FF	FF	FF	FF	FF	FF	FF	FF	FF	FF	FF	FF	FF	FF	FF	FF	FF	FF	FF	FF	FF	FF	notMM	notMM	FF	FF	FF	FF	FF	FF	MF	MF	MF	MF	MF	MF	MF	MF
BepaF2_5_3	FF	FF	NA	FF	FF	FF	FF	FF	notMM	notMM	notMM	FF	FF	FF	FF	FF	FF	FF	FF	FF	FF	FF	notMM	FF	FF	FF	FF	FF	FF	FF	FF	FF	FF	notMM	FF	FF	FF	FF	notMM	FF	FF	FF	FF	notMM	FF	FF	FF	FF	FF
BepaF2_5_4	MF	MF	MF	MF	MF	MF	MF	MF	MF	MF	notFF	MF	MF	MF	MF	MF	MF	MF	MF	MF	MF	MF	MF	MF	MF	MF	MF	MF	MF	MF	MF	MF	MF	MF	MF	MF	MF	MF	MF	MF	MF	MF	MF	MF	MF	MF	MF	MF	MF
BepaF2_5_5	MF	MF	notFF	MF	MF	MF	MF	MF	MF	MF	MF	MF	MF	MF	MF	MF	MF	MF	MF	MF	MF	MF	MF	MF	MF	MF	MF	MF	MF	MF	MF	MF	MF	MF	MF	MF	MF	MF	MF	MF	MF	FF	FF	FF	FF	FF	FF	FF	FF
BepaF2_5_6	MM	MM	notFF	MM	MM	MM	MM	MF	MF	notMM	MF	MF	MF	MF	MF	MF	MF	MF	MF	MF	MF	MF	MF	MF	MF	MF	MF	MF	MF	MF	MF	MF	MF	MF	MF	MF	MF	MF	MF	MF	MF	MF	MF	MF	MF	MF	MF	MF	MF
BepaF2_5_7	MF	MF	MF	MF	MF	MF	MF	MF	notFF	MF	NA	MF	MF	MF	MF	FF	FF	FF	MF	FF	FF	notMM	FF	FF	FF	FF	FF	FF	FF	FF	FF	FF	FF	notMM	FF	FF	FF	FF	FF	FF	FF	FF	FF	FF	FF	notMM	notMM	FF	notMM
BepaF2_5_8	FF	FF	notMM	FF	FF	FF	FF	notFF	MF	MF	notMM	MF	MF	MF	MF	MF	MF	MF	MF	MF	MF	MF	notFF	MM	MM	MM	MM	MM	MM	MM	MM	MM	MM	MF	MM	MM	MM	notFF	MM	MM	MM	MM	MM	MM	MM	MM	notFF	MM	MM
BepaF2_5_9	FF	FF	FF	FF	FF	FF	FF	FF	FF	FF	notMM	FF	FF	FF	FF	FF	FF	FF	FF	FF	FF	FF	FF	FF	FF	FF	FF	FF	FF	FF	FF	FF	FF	FF	FF	FF	FF	FF	FF	FF	FF	FF	FF	MF	MF	MF	notFF	MF	MF
BepaF2_5_10	MF	MF	MF	MF	MF	MF	MF	MF	MF	notMM	NA	MF	MF	MF	MM	MM	MM	MM	MM	MM	MM	MM	MM	MM	MM	MM	MM	MM	MM	MM	MM	MM	MM	MM	MM	MM	MM	MM	MF	MF	MF	MF	MF	MF	MF	MF	notFF	MF	MF
BepaF2_5_11	MF	MF	notFF	MF	MF	MF	MF	MF	MF	MF	MF	MF	MM	MM	MM	MM	MM	MM	MM	MM	MM	MM	MM	MM	MM	MM	MM	MM	MM	MM	MM	MM	MM	MM	MM	MM	MM	MM	MM	MM	MM	MM	MM	MM	MM	MM	MM	MM	MM
BepaF2_5_12	MF	MF	MF	MF	MF	MF	MF	MF	MF	MF	MF	MF	MM	MM	MM	MM	MM	MM	MM	MM	MM	MM	MM	MM	MM	MM	MM	MM	MM	MM	MM	MM	MM	MM	MM	MM	MM	MM	MM	MM	MM	MM	MM	MM	MM	MM	MM	MM	MM
BepaF2_5_13	MF	MF	MF	MF	MF	MF	MF	MF	MF	MF	MF	MF	MM	MM	MM	MM	MM	MM	MM	MM	MM	MM	MM	MM	MM	MM	MM	MM	MM	MM	MM	MM	MM	MM	MM	MM	MM	MF	MF	MF	MF	MF	MF	MF	MF	MF	MF	MF	MF
BepaF2_5_14	MF	MF	MF	MF	MF	MF	MF	MF	MF	notMM	notFF	MF	MF	MF	MM	MM	MF	MF	MF	MF	MF	MF	MF	MF	MF	MF	MF	MF	MF	MF	MF	MF	MF	notMM	MF	MF	MM	MM	MM	MM	MM	MM	MM	MM	MM	MM	notFF	MM	MM
BepaF2_5_15	FF	FF	notMM	FF	FF	FF	FF	FF	FF	FF	notMM	FF	FF	FF	FF	FF	FF	FF	FF	FF	FF	FF	FF	FF	FF	FF	FF	FF	FF	FF	FF	FF	FF	FF	FF	FF	FF	FF	FF	FF	FF	MF	MF	MF	MF	MF	MF	MF	MF
BepaF2_5_16	MF	MF	MF	notFF	MF	MF	MF	MF	notFF	NA	MF	MF	MF	MF	MF	MF	MF	MF	MF	MF	MF	notFF	MF	MF	MF	MF	MF	MF	MF	MF	MF	MF	MF	MF	MF	MF	MF	MF	MF	MF	MF	MF	MF	MF	notMM	FF	notMM	FF	FF
BepaF2_5_17	MF	MF	NA	MF	MF	MF	MF	notFF	MF	notFF	notMM	MF	MM	MM	MM	MM	MM	MM	MM	MM	MM	MM	MM	MM	MM	MM	MM	MM	MM	MM	MM	MM	MM	MM	MM	MM	MM	MM	MM	MM	MM	MM	MM	MM	MM	MM	MM	MM	MM
BepaF2_5_18	notMM	FF	notMM	FF	FF	FF	FF	FF	notMM	notMM	notMM	FF	FF	FF	FF	FF	MF	MF	MF	MF	MF	MF	MF	MF	MF	MF	MF	MF	MF	MF	MF	MF	MF	notMM	MF	MF	MF	MF	MF	MF	MF	MF	MF	MF	notMM	MF	notMM	notFF	MF
BepaF2_5_19	MF	MF	notMM	MF	MF	MF	MF	MF	notFF	notFF	NA	MF	MF	MF	MF	MF	MF	MF	MF	MF	MF	MF	notMM	MF	MF	MF	MF	MF	MF	MF	MF	MF	MF	MF	MF	MF	MF	MF	MF	MF	MM	MM	MM	MM	MM	MM	MM	MM	MM
BepaF2_5_20	notFF	MM	notFF	MM	MM	MM	MM	MM	MM	notFF	notFF	MM	MM	MM	MM	MM	MM	MM	MM	notFF	MF	MF	MF	MF	MF	MF	MF	MF	MF	MF	MF	MF	MF	MF	MF	MF	MF	MF	MF	MF	MF	MF	MF	MF	MF	MF	notMM	MF	MF
BepaF2_5_21	FF	FF	FF	FF	FF	FF	FF	FF	FF	FF	FF	FF	FF	FF	FF	FF	FF	FF	FF	FF	FF	FF	FF	FF	FF	FF	FF	FF	FF	FF	FF	FF	FF	FF	FF	FF	FF	FF	FF	FF	FF	FF	FF	MF	MF	MF	MF	MF	MF
BepaF2_5_22	FF	FF	FF	FF	FF	FF	FF	FF	notMM	FF	notMM	FF	FF	FF	FF	FF	MF	MF	MM	MM	MM	MM	MM	MM	MM	MM	MM	MM	MM	MM	MM	MM	MM	MM	MM	MM	MM	MM	MM	MM	MM	MM	MM	MM	MM	MM	MM	MM	MM
BepaF2_5_23	MF	MF	MF	MF	MF	MF	MF	MF	MF	MF	notFF	MF	MF	MF	MF	MF	MF	MF	MF	MF	MF	MF	MF	MF	MF	MF	MF	MF	MF	MF	MF	MF	MF	MF	MF	MF	MF	MF	MF	MF	MF	MF	MF	MF	FF	FF	FF	FF	FF
BepaF2_5_24	MM	MM	MM	MM	MM	MM	MM	MM	MM	MM	notFF	MM	MM	MM	MM	MM	MM	MM	MM	MM	MM	MM	MM	MM	MM	MM	MM	MM	MM	MM	MM	MM	MM	MM	MM	MM	MM	MM	MM	MM	MM	MM	MM	MM	MM	MM	MM	MM	MM
BepaF2_5_25	MF	MF	MF	MF	MF	MM	MM	MM	MM	MM	MM	MM	MM	MM	MM	MM	MM	MM	MM	MM	MM	MM	MM	MM	MM	MM	MM	MM	MM	MM	MM	MM	MM	MM	MM	MM	MM	MM	MM	MM	MM	MM	MM	MM	MM	MM	MM	MM	MM
BepaF2_5_26	FF	FF	FF	FF	FF	FF	FF	FF	FF	FF	FF	MF	MF	MF	MF	MF	MF	MF	MF	MF	MF	MF	MF	MF	MF	MF	MF	MF	MF	MF	MF	MF	MF	MF	MF	MF	MF	MF	MF	MF	MF	MF	MF	MF	MF	MF	MF	MF	MF
BepaF2_5_27	notFF	MM	notFF	MM	MM	MM	MM	MM	notFF	MM	notFF	FF	FF	FF	FF	FF	FF	FF	notMM	FF	FF	FF	notMM	FF	FF	FF	FF	FF	FF	FF	FF	FF	FF	notMM	FF	FF	MF	FF	FF	MF	MF	MF	MF	MF	MF	MF	MF	MF	MF
BepaF2_5_28	MF	MF	MF	MF	MF	MF	MF	MF	MF	MF	MF	MF	MF	FF	FF	FF	FF	FF	FF	FF	FF	FF	FF	FF	FF	FF	FF	FF	FF	FF	FF	FF	FF	FF	FF	FF	FF	FF	FF	FF	FF	FF	FF	FF	FF	FF	MF	FF	FF
BepaF2_5_29	MF	MF	MF	MF	MF	MF	MF	MF	MF	MF	MF	MF	MF	FF	FF	FF	FF	FF	FF	FF	FF	FF	FF	FF	FF	FF	FF	FF	FF	FF	FF	FF	FF	FF	FF	FF	FF	FF	FF	FF	FF	FF	FF	FF	FF	FF	FF	FF	FF
BepaF2_6_1	MM	MM	notFF	MM	MM	MM	MM	MM	MM	MM	notFF	MM	MM	MM	MF	MF	MF	MF	MF	MF	MF	MF	MF	MF	MF	MF	MF	MF	MF	MF	MF	MF	MF	MF	FF	FF	FF	FF	FF	FF	FF	FF	FF	FF	FF	FF	FF	FF	FF
BepaF2_6_2	FF	MF	notMM	notMM	MF	MF	MF	notMM	MF	MF	MF	MF	MF	MF	MF	MF	MF	MF	MF	MF	MF	MF	MF	MF	MF	MF	MF	MF	MF	MF	MF	MF	MF	MF	MF	MF	MF	MF	MF	MF	MF	FF	FF	FF	FF	FF	FF	FF	FF
BepaF2_6_3	MM	MM	MM	MM	MM	MM	MM	MM	MM	MF	MF	MF	MF	MF	MF	MF	MF	MF	MF	MF	MF	MF	MF	MF	MF	MF	MF	MF	MF	MF	MF	MF	MF	MF	MF	MF	MF	MF	MF	MF	MF	MF	MF	MF	MF	MF	notMM	MF	MF
BepaF2_6_5	notMM	MF	MF	MF	MF	MF	MF	MF	MF	MF	notMM	MF	MF	MF	MF	MF	MF	MF	MF	MF	MF	MF	MF	MF	MF	MF	MF	MF	MF	MF	MF	MF	MF	MF	MF	MF	MF	MF	MF	MF	MF	MF	MF	MF	MF	notMM	MF	MF	MF
BepaF2_6_6	MM	MM	notFF	MM	MM	MM	MM	MM	MM	MM	MM	MF	MF	MF	MF	MF	MF	MF	MF	MF	MF	MF	MF	MF	MF	MF	MF	MF	MF	MF	MF	MF	MF	MF	MF	MF	MF	MF	MF	MF	MF	MF	MF	MF	MF	MF	MF	MF	MF
BepaF2_6_7	MF	MF	notFF	MF	MF	MF	MF	MF	MF	MF	MF	MF	MF	MF	MF	MF	MF	MF	MF	MF	MF	MF	MF	MF	MF	MF	MF	MF	MF	MF	MF	MF	MF	MF	MF	MF	MF	MF	MF	MF	MF	MF	MF	MF	MF	MF	notFF	MF	MF
BepaF2_6_9	MM	MM	NA	MM	MM	MM	MM	MM	notFF	MM	notFF	MM	MM	MM	MF	MF	MF	MF	MF	MF	MF	MF	MF	MF	MF	MF	MF	MF	MF	MF	MF	MF	MF	MF	MF	MF	FF	MF	MF	MF	MF	MF	MF	MF	MM	MM	MM	MM	MM
BepaF2_6_10	NA	notFF	notFF	MM	MM	notFF	notFF	notFF	notFF	notFF	NA	MM	MF	MF	MF	MF	MF	MF	notFF	notMM	notMM	notMM	notMM	MF	MF	MF	notMM	MF	MF	MF	MF	MF	notMM	MF	notMM	MF	MF	NA	MF	notMM	MF	notFF	notMM	MF	MF	MF	NA	notFF	MF
BepaF2_6_11	MM	MM	notFF	MM	MM	MM	MM	MM	MM	MM	NA	MM	MM	MM	MM	MM	MM	MM	MM	MM	MM	MM	MM	MM	MM	MM	MM	MM	MM	MM	MM	MM	MM	notFF	MM	MM	MM	MM	MM	MM	MM	MM	MM	MM	MM	MM	notFF	MM	MM
BepaF2_6_12	MF	MF	notFF	MF	MF	MF	MF	MF	notMM	notMM	notFF	MF	MF	MF	MF	MF	MF	MF	MF	MF	MF	MF	MF	MF	MF	MF	MF	MF	MF	MF	MF	MF	MF	MF	MF	MF	MF	MF	MF	MF	MF	MF	MF	MF	MF	MF	notFF	MF	MF
BepaF2_6_14	notMM	MF	notFF	MF	MF	MF	MF	notFF	MF	MF	MF	MF	MF	MF	MF	MF	MF	MF	MF	MF	MF	MF	MF	MF	MF	MF	MF	MF	MF	MF	MF	MF	MF	notMM	MF	MF	MF	notFF	MM	MM	MM	MM	MM	MM	MM	MM	NA	MM	MM
BepaF2_6_15	notMM	FF	notMM	FF	FF	FF	FF	FF	FF	notMM	notMM	FF	FF	FF	FF	FF	FF	FF	FF	MF	MF	MF	MF	MF	MF	MF	MF	MF	MF	MF	MF	MF	MF	MF	MF	MF	MF	MF	MF	MF	MF	MM	MF	MF	notMM	MF	MF	MF	MF
BepaF2_6_16	notMM	notMM	NA	FF	FF	FF	MF	notMM	MF	notMM	notFF	MF	MF	notFF	MF	notFF	MF	MF	MF	MF	MF	MF	MF	MF	MF	MF	MF	MF	MF	MF	MF	MF	MF	MF	notMM	notFF	notFF	notFF	MM	MM	MM	MM	notFF	MM	notFF	notFF	MM	MM	MM
BepaF2_6_17	notFF	MF	MF	MF	MF	MF	MF	notFF	NA	notFF	notFF	MM	MM	MF	MF	MF	MF	notMM	MF	MF	MF	MM	MF	MF	MF	MF	MF	MF	MF	MF	MF	MF	MF	MF	MF	notMM	MF	MF	MF	MF	MF	MM	MM	MM	MM	MM	notFF	notFF	MM
BepaF2_6_18	MM	MM	notFF	MM	MM	notFF	MM	MM	notFF	notFF	NA	MM	MM	MM	MM	MF	MF	MF	MF	MF	MF	MF	MF	MF	MF	MF	MF	MF	MF	MF	MF	MF	MF	MF	MF	MF	MF	MF	MF	MM	MF	MF	MF	MF	MF	MF	MF	MF	MF
BepaF2_6_19	FF	FF	notMM	notMM	FF	FF	FF	notMM	notMM	notMM	notMM	FF	FF	FF	FF	FF	FF	FF	FF	FF	notMM	FF	notMM	FF	FF	FF	FF	FF	FF	FF	FF	FF	FF	notMM	FF	FF	FF	FF	FF	FF	FF	FF	FF	MF	notMM	MF	notFF	MF	MF
BepaF2_6_21	notFF	notMM	notFF	notMM	MF	notMM	NA	notFF	NA	notMM	NA	notMM	MF	notFF	MM	notFF	notFF	MM	notFF	NA	NA	notFF	notFF	notFF	MM	MM	notFF	MM	notFF	notFF	notFF	notFF	notFF	notFF	notFF	NA	NA	NA	NA	notFF	notFF	notFF	MF	notFF	notFF	notFF	NA	notFF	notFF
BepaF2_6_22	FF	FF	notMM	FF	FF	FF	FF	FF	FF	FF	notMM	FF	MF	MF	MF	MF	MF	MF	MF	MF	MF	MF	notMM	MF	MF	MF	MF	MF	MF	MF	MF	MF	MF	MF	MF	MF	MF	MF	MF	MF	MF	MF	MF	MF	MF	MF	notFF	MF	MF
BepaF2_6_23	notMM	MF	notMM	MF	MF	MF	MF	notMM	MF	MF	MF	notMM	FF	FF	FF	FF	FF	FF	FF	FF	FF	FF	notMM	FF	FF	FF	FF	FF	FF	FF	FF	FF	FF	notMM	FF	FF	notMM	FF	FF	FF	FF	FF	FF	FF	MF	MF	notFF	MF	MF
BepaF2_6_25	FF	FF	notMM	FF	FF	FF	FF	FF	notMM	notMM	notMM	FF	FF	FF	notMM	MF	MF	MF	MF	MF	MF	notMM	notFF	MF	MF	MF	MF	MF	MF	MF	MF	MF	MF	MF	MF	MF	MF	MF	notMM	MF	MF	MF	MF	notFF	MF	MF	NA	MF	MF
BepaF2_6_29	MF	MF	NA	MF	MF	MF	MF	MF	MF	notFF	NA	MF	MF	MF	MF	MF	MF	MF	notFF	MF	MF	MF	MF	MF	MF	MF	MF	MF	MF	MF	MF	MF	MF	MF	MF	MF	MF	MM	MF	MF	MF	MF	MF	MF	MF	MM	MM	MM	MM
BepaF2_6_31	notFF	notMM	NA	MF	MF	MF	notMM	FF	notMM	notMM	notMM	FF	FF	FF	FF	MF	MF	notFF	MF	MF	notMM	MF	MF	MF	MF	MF	MF	MF	MF	MF	MF	MF	MF	notFF	notFF	notMM	notFF	notMM	FF	FF	FF	FF	FF	FF	notMM	FF	notMM	FF	FF
BepaF2_6_32	MM	MM	NA	MM	MM	MM	MM	MM	MM	MF	notMM	MF	MF	MF	MF	MF	MF	MF	notFF	MF	MF	MF	MF	MF	MF	MF	MF	MF	MF	MF	MF	MF	MF	MF	MF	MF	MF	MF	MF	MF	MF	MF	MF	MF	MF	MM	notFF	MM	MM
BepaF2_6_33	notMM	FF	NA	FF	FF	FF	notMM	notMM	notMM	FF	NA	FF	FF	FF	FF	FF	FF	FF	FF	FF	notMM	FF	FF	FF	FF	FF	FF	FF	FF	FF	FF	FF	FF	notMM	FF	FF	FF	FF	FF	FF	MF	MF	notFF	MF	MF	MF	notFF	MF	MF
BepaF2_6_35	FF	MF	notFF	MF	MF	MF	notFF	MF	notMM	notMM	notFF	MF	MF	MF	MF	MF	MF	MF	notFF	notFF	MF	MF	notFF	MM	MM	MM	MM	MM	MM	MM	MM	MM	MM	notFF	notFF	MM	MM	notFF	MM	MM	MM	MM	notFF	notFF	notFF	notFF	notFF	notFF	MM
BepaF2_7_1	MF	MF	MF	MF	MF	MF	MF	MF	MF	notMM	MF	MF	MF	MF	MF	MF	MF	MF	MF	notMM	FF	FF	FF	FF	FF	FF	FF	FF	FF	FF	FF	FF	FF	FF	FF	FF	FF	FF	FF	FF	FF	FF	FF	FF	FF	FF	notMM	FF	FF
BepaF2_7_2	MM	MM	notFF	MF	MF	MF	MF	MF	MF	MF	notFF	MF	MF	MF	MF	MF	MF	MF	MF	MF	MF	MF	MF	MF	MF	MF	MF	MF	MF	MF	MF	MF	MF	MF	MF	MF	notFF	notFF	MF	MF	MF	MF	MF	MF	MF	MF	notFF	MF	MF
BepaF2_7_6	FF	FF	notMM	FF	FF	FF	FF	FF	FF	FF	notMM	FF	FF	FF	FF	FF	MF	MF	MF	MF	MF	MF	MF	MF	MF	MF	MF	MF	MF	MF	MF	MF	MF	MM	MF	MF	MF	MF	MF	MF	MF	MF	MF	MF	MF	notMM	NA	MF	MF
BepaF2_7_7	notMM	MF	NA	notMM	MF	MF	MF	MF	notFF	notFF	NA	MF	MF	MF	MF	MF	notMM	MF	MF	MF	MF	MF	MF	MF	MF	MF	MF	MF	MF	notFF	MF	MF	MF	MF	MF	MF	MF	MF	MF	MF	MF	MF	MF	MM	notMM	MF	notFF	MF	MF
BepaF2_7_8	notMM	FF	notMM	FF	FF	FF	FF	FF	notMM	notMM	NA	FF	FF	FF	FF	FF	FF	FF	FF	FF	notMM	FF	FF	FF	FF	FF	FF	FF	FF	FF	FF	FF	FF	notMM	FF	FF	FF	notMM	FF	FF	FF	FF	FF	FF	FF	notMM	FF	notMM	FF
BepaF2_7_9	notFF	MM	NA	MM	MM	MF	notMM	notFF	notMM	notMM	notFF	MF	MF	MF	MF	MF	MF	MF	MF	MF	notMM	MF	MF	MF	MF	MF	MF	MF	MF	MF	MF	MF	MF	MF	MF	MF	MF	notMM	MF	MF	FF	FF	FF	FF	FF	notMM	FF	FF	FF
BepaF2_7_10	MM	MM	MM	MM	MM	MM	MM	MM	notFF	MM	NA	MM	MF	MF	MF	MF	MF	MF	MF	MF	MF	MF	MF	MF	MF	MF	MF	MF	MF	MF	MF	MF	MF	MF	MF	MF	MF	MF	MF	MF	MF	MF	MF	MF	MF	MF	MF	MF	MF
BepaF2_7_11	MF	MF	notFF	MM	MF	MF	MF	MF	MF	notFF	NA	MF	notMM	FF	FF	FF	FF	FF	notMM	FF	FF	FF	FF	FF	FF	FF	FF	FF	FF	FF	FF	FF	FF	notMM	FF	FF	FF	MF	MF	MF	MF	MF	MF	MF	notFF	MF	notFF	MF	MF
BepaF2_7_12	FF	FF	notMM	FF	FF	FF	FF	FF	notMM	notMM	notMM	FF	FF	FF	FF	FF	FF	FF	FF	FF	FF	FF	FF	FF	FF	FF	FF	FF	FF	FF	FF	FF	FF	FF	FF	FF	FF	FF	FF	FF	FF	FF	FF	FF	FF	FF	NA	FF	FF
BepaF2_7_13	MM	MM	notFF	MM	MM	MM	MM	MM	MM	MM	notFF	MM	MM	MF	MF	MF	MF	MF	MF	MF	MF	MF	MF	MF	MF	MF	MF	MF	MF	MF	MF	MF	MF	MF	MF	MF	MF	MF	MF	MF	MF	MF	MF	MF	MF	MF	MF	MF	MF
BepaF2_7_14	FF	FF	FF	FF	FF	FF	FF	FF	notMM	FF	notMM	MF	MF	MF	MF	MF	MF	MF	MF	MF	MF	MF	MF	MF	MF	MF	MF	MF	MF	MF	MF	MF	MF	MF	MF	MF	MF	MF	MF	MF	MF	MF	MF	MF	MF	MF	notFF	MF	MF
BepaF2_7_15	notMM	FF	NA	FF	FF	notMM	FF	FF	notMM	notMM	notMM	FF	FF	FF	FF	FF	FF	FF	FF	FF	FF	FF	FF	FF	FF	FF	FF	FF	FF	FF	FF	FF	FF	notMM	FF	FF	FF	FF	FF	FF	FF	notMM	notMM	MF	MF	MF	notFF	MM	MF
BepaF2_7_16	MM	MM	notFF	MM	MM	MM	MM	notFF	notFF	notFF	notFF	MM	MM	MM	MM	MM	MF	MF	MF	MF	MF	MF	MF	MF	MF	MF	MF	MF	MF	MF	MF	MF	MF	MF	MF	MF	notMM	MF	MF	MF	MF	MF	MF	MF	MF	MF	MF	MF	MF
BepaF2_7_17	FF	FF	FF	FF	FF	FF	MF	MF	notFF	MF	notFF	MF	MF	MF	MF	MF	MF	MF	MF	MF	MF	MF	MF	MF	MF	MF	MF	MF	MF	MF	MF	MF	MF	MF	MF	MF	MF	MF	MF	MF	MF	MF	MF	MF	MF	MF	MF	MF	MF
BepaF2_7_18	MM	MM	NA	MM	MM	MM	MM	notFF	notFF	notFF	notFF	MM	MM	MM	MM	MM	MM	MM	notFF	MM	MM	MM	notFF	MM	MM	MM	MM	MM	MM	MM	MM	MM	MM	notFF	MM	MM	notFF	MM	MM	MM	MM	MM	MM	MM	MM	MM	notFF	MM	MM
BepaF2_7_19	MM	MM	NA	MM	MM	MM	MM	MM	MM	notFF	notFF	MF	MF	MF	MF	MF	MF	MF	MF	MF	MF	MF	notFF	MF	MF	MF	MF	MF	MF	MF	MF	MF	MF	MF	MF	MF	MF	notFF	MF	MF	MF	MF	MF	MF	MF	MF	MF	MF	MF
BepaF2_7_20	MM	MM	NA	MM	MF	MF	MF	MF	MF	notFF	notMM	MF	MF	MF	MF	MF	MF	MF	MF	MF	MF	MF	notFF	MF	MF	MF	MF	MF	MF	MF	MF	MF	MF	MF	MF	MF	MF	MF	MF	MF	MF	MF	MF	MF	notFF	MF	MF	MF	MF
BepaF2_7_21	notMM	notMM	notMM	FF	FF	FF	FF	notMM	notMM	NA	notMM	FF	FF	FF	FF	notMM	FF	FF	notMM	notMM	notMM	notMM	notMM	FF	FF	FF	FF	FF	FF	FF	FF	FF	FF	notMM	notMM	notFF	MF	notMM	MF	MF	notFF	MF	MF	notFF	MF	MF	NA	MF	MF
BepaF2_7_22	FF	FF	notMM	FF	FF	notMM	FF	FF	notMM	notMM	notMM	FF	FF	MF	MF	MF	MF	MF	MF	MF	MF	MF	MF	MF	MF	MF	MF	MF	MF	MF	MF	MF	MF	MF	MF	MF	MF	MF	MF	MF	MF	MF	MF	MF	MF	notFF	notFF	MF	MF
BepaF2_7_23	FF	FF	notMM	FF	FF	FF	FF	FF	FF	FF	notMM	MF	MM	MM	MM	MM	MM	MM	MM	MM	MM	MM	MM	MM	MM	MM	MM	MM	MM	MM	MM	MM	MM	MM	MM	MM	MM	MM	MM	MM	MM	MM	MM	MM	MM	MM	notFF	MM	MM
BepaF2_7_24	MF	MF	MF	MF	MF	MF	FF	FF	FF	FF	notMM	FF	FF	FF	FF	FF	FF	FF	FF	FF	FF	FF	FF	FF	FF	FF	FF	FF	FF	FF	FF	FF	FF	FF	FF	FF	FF	FF	FF	FF	FF	FF	FF	FF	FF	FF	FF	FF	FF
BepaF2_7_25	MF	MF	notMM	MF	MF	MF	MF	MF	MF	notFF	NA	MF	FF	FF	FF	FF	FF	FF	FF	FF	FF	FF	FF	FF	FF	FF	FF	FF	FF	FF	FF	FF	FF	notMM	FF	FF	FF	notMM	FF	FF	FF	FF	FF	FF	FF	FF	FF	FF	FF
BepaF2_7_26	FF	FF	notMM	FF	FF	FF	FF	FF	notMM	notMM	notMM	FF	FF	FF	FF	FF	FF	FF	FF	FF	FF	FF	FF	FF	FF	FF	FF	FF	FF	FF	FF	FF	FF	FF	FF	FF	FF	FF	FF	FF	FF	FF	FF	MF	MF	MF	MF	MF	MF
BepaF2_7_27	notMM	FF	notMM	FF	FF	MF	MF	MF	MF	MF	MF	MF	MF	MF	MF	MF	MF	MF	MF	MF	MF	MF	notMM	MF	MF	MF	MF	MF	MF	MF	MF	MF	MF	notFF	MF	MF	MF	MF	MF	MF	MF	MF	MF	MF	MF	MF	NA	MF	MF
BepaF2_7_28	MM	MM	NA	MM	MM	MM	MM	MM	notFF	notFF	notFF	MM	MM	MM	MM	MM	MM	MM	MM	MM	MM	MM	MM	MM	MM	MM	MM	MM	MM	MM	MM	MM	MM	notFF	MM	MM	MM	MM	MM	MM	MM	MM	MM	MM	MM	notFF	notFF	MF	MF
BepaF2_7_29	MM	MM	notFF	MM	MM	notFF	MM	MM	notFF	notFF	notFF	MF	MF	notFF	MF	MF	MF	MF	MF	MF	MF	MF	FF	MF	MF	MF	MF	MF	MF	MF	MF	MF	MF	MF	MF	MF	notMM	MF	MF	MF	MF	MF	MF	MF	MM	MM	MM	MM	MM
BepaF2_7_30	notFF	MM	NA	MM	MM	MM	MM	notFF	MM	notFF	notFF	MM	MM	MF	MF	FF	FF	FF	FF	FF	FF	FF	FF	FF	FF	FF	FF	FF	FF	FF	FF	FF	FF	FF	FF	FF	FF	FF	FF	FF	FF	FF	FF	FF	FF	FF	notMM	FF	FF
BepaF2_7_31	FF	FF	notMM	FF	FF	FF	FF	FF	FF	notMM	notMM	FF	FF	FF	FF	FF	FF	FF	FF	FF	FF	FF	FF	FF	FF	FF	FF	FF	FF	FF	FF	FF	FF	FF	FF	FF	FF	FF	FF	FF	FF	FF	FF	FF	FF	FF	notMM	FF	FF
BepaF2_7_32	notFF	MM	notFF	MM	MM	MM	MM	notFF	MM	MM	NA	MM	MM	MM	MM	MM	MM	MM	MM	MM	MM	MM	MM	MM	MM	MM	MM	MM	MM	MM	MM	MM	MM	MM	MM	MM	MM	MM	notFF	MM	MM	MM	MM	MM	MM	MM	notFF	MM	MM
BepaF2_8_1	MM	MM	MM	MM	MM	MM	MM	MM	MM	MM	MM	MM	MM	MM	MM	MF	MF	MF	MF	MF	MF	MF	MF	MF	MF	MF	MF	MF	MF	MF	MF	MF	MF	MF	MF	MF	MF	MM	MM	MM	MM	MM	MM	MM	MM	MM	MM	MM	MM
BepaF2_8_2	FF	FF	FF	FF	FF	FF	FF	FF	FF	FF	FF	FF	FF	FF	FF	FF	FF	FF	FF	FF	FF	FF	FF	FF	FF	FF	FF	FF	FF	FF	FF	FF	FF	FF	FF	FF	FF	FF	FF	FF	FF	FF	FF	FF	FF	FF	FF	FF	FF
BepaF2_8_3	MF	MF	MF	MF	MF	MF	MF	MF	MF	FF	FF	FF	FF	FF	FF	FF	FF	FF	FF	FF	FF	FF	FF	FF	FF	FF	FF	FF	FF	FF	FF	FF	FF	FF	FF	FF	FF	FF	FF	FF	FF	FF	FF	FF	FF	FF	FF	FF	FF
BepaF2_8_4	MF	MF	MF	MF	MF	MF	MF	MF	MF	MF	MF	MF	MF	MF	MF	MF	MF	MF	MF	MF	MF	MF	MF	MF	MF	MF	MF	MF	MF	FF	MF	MF	MF	MF	FF	FF	FF	FF	FF	FF	FF	FF	FF	FF	FF	FF	FF	FF	FF
BepaF2_8_5	MF	MF	MF	MF	MF	MF	MF	MF	MF	MF	notMM	MF	MF	MF	MM	MM	MF	MF	MF	MF	MF	MF	MF	MF	MF	MF	MF	MF	MF	MF	MF	MF	MF	MF	MF	MF	MF	MF	MF	MF	MF	MF	MF	MF	MF	MF	MF	MF	MF
BepaF2_8_6	MF	MF	MF	MF	MF	MF	MF	MF	MF	MF	MF	MF	MF	MF	MF	MF	MF	MF	MF	MF	MF	MF	MF	MF	MF	MF	MF	MF	MF	MF	MF	MF	MF	MF	MF	MF	MF	MF	MF	MF	MF	MF	MF	MF	MF	MF	MF	MF	MF
BepaF2_8_7	MF	MF	MF	MF	MF	FF	FF	FF	FF	FF	notMM	FF	FF	FF	MF	MF	MF	MF	MF	MF	MF	MF	MF	MF	MF	MF	MF	MF	MF	MF	MF	MF	MF	MF	MF	MF	MF	MF	MF	MF	MF	MF	MF	MF	MF	MF	MF	MF	MF
BepaF2_8_8	FF	FF	FF	FF	FF	FF	FF	FF	FF	FF	FF	FF	FF	FF	FF	FF	FF	FF	FF	FF	FF	FF	FF	MF	FF	MF	MF	MF	MF	MF	MF	MF	FF	MF	MF	MF	MF	MF	MF	MF	MF	MF	MF	MF	MF	MF	MF	MF	MF
BepaF2_8_9	MF	MF	MF	MF	MF	MF	MF	FF	FF	FF	FF	FF	FF	FF	FF	FF	FF	FF	FF	FF	FF	FF	FF	FF	FF	FF	FF	FF	FF	FF	FF	FF	FF	FF	MF	MF	MF	MF	MF	MF	MF	MF	MF	MF	MF	MF	MF	MF	MF
BepaF2_8_10	FF	FF	FF	FF	FF	FF	FF	FF	FF	FF	FF	FF	FF	FF	FF	FF	FF	FF	FF	FF	FF	FF	FF	FF	FF	FF	FF	FF	FF	FF	FF	FF	FF	FF	FF	FF	FF	FF	FF	FF	FF	FF	FF	FF	FF	FF	FF	FF	FF
BepaF2_8_11	MF	MF	MF	MF	MF	MF	MF	MF	MF	MF	MF	MF	MF	MF	MF	MF	MF	MF	MF	MF	MF	MF	MF	MF	MF	MF	MF	MF	MF	MF	MF	MF	MF	MF	MF	MF	MF	MF	MF	MF	MF	MF	MM	MM	MM	MM	MM	MM	MM
BepaF2_8_12	MF	MF	MF	MF	MF	MF	MF	MF	MF	MF	MF	MF	MF	FF	FF	FF	FF	FF	FF	FF	FF	FF	FF	FF	FF	FF	FF	FF	FF	FF	FF	FF	FF	FF	FF	FF	FF	FF	FF	FF	FF	FF	FF	FF	FF	FF	FF	FF	FF
BepaF2_8_13	FF	FF	FF	FF	FF	FF	FF	MF	MF	MF	MF	MF	MF	MF	MF	MF	MF	MF	MF	MF	MM	MM	MM	MM	MM	MM	MM	MM	MM	MM	MM	MM	MM	MM	MM	MM	MM	MM	MM	MM	MM	MM	MM	MF	MF	MF	MF	MF	MF
BepaF2_8_14	MM	MM	MM	MM	MM	MM	MM	MM	MM	MM	NA	MF	FF	FF	FF	FF	FF	FF	FF	FF	FF	FF	FF	FF	FF	FF	FF	FF	FF	FF	FF	FF	FF	FF	FF	FF	FF	FF	FF	FF	MF	MF	MF	MF	MF	MF	notFF	MF	FF
BepaF2_8_15	FF	FF	FF	FF	FF	FF	FF	FF	FF	FF	FF	FF	FF	FF	FF	FF	FF	FF	FF	FF	FF	FF	FF	FF	FF	FF	FF	FF	FF	FF	FF	FF	FF	FF	FF	FF	FF	FF	FF	FF	MF	MF	MF	MF	MF	MF	MF	MF	MF
BepaF2_8_16	MF	MF	MF	MF	MF	MF	MF	MF	MF	MF	MF	MF	MF	MM	MM	MM	MF	MF	MF	MF	MF	MF	MF	MF	MF	MF	MF	MF	MF	MF	MF	MF	MF	MF	MF	MF	MF	MF	MF	MF	MF	MF	MF	MF	MF	MF	MF	MF	MF
BepaF2_8_17	MF	MF	notMM	MF	MF	MF	FF	FF	FF	FF	NA	FF	FF	FF	FF	MF	MF	MF	MF	MF	MF	MF	MF	MF	MF	MF	MF	MF	MF	MF	MF	MF	MF	MF	MF	MF	MF	MF	MF	MF	MF	MF	MF	MF	MF	MF	MF	MF	FF
BepaF2_8_18	MF	MF	MF	MF	MF	MF	MF	MF	MF	MF	MF	MF	MF	MF	MF	MF	MM	MM	MM	MM	MM	MM	MM	MM	MM	MM	MM	MM	MM	MM	MM	MM	MM	MM	MM	MM	MM	MM	MM	MM	MM	MM	MM	MM	MM	MM	MM	MM	MM
BepaF2_8_19	FF	FF	FF	FF	FF	FF	FF	MF	MF	MF	MF	MF	MF	MF	MF	MF	MF	MF	MM	MM	MM	MM	MM	MM	MM	MM	MM	MM	MM	MM	MM	MM	MM	MM	MM	MM	MM	MM	MM	MM	MM	MM	MM	MM	MM	MM	MM	MM	MM
BepaF2_8_20	MM	MM	MM	MM	MM	MM	MM	MM	MM	MM	MM	MM	MM	MF	MF	MF	MF	MF	MF	MF	MF	MF	MF	MF	MF	MF	MF	MF	MF	MF	MF	MF	MF	MF	MF	MF	MF	MF	MF	MF	MF	MF	MF	MF	MF	MF	MF	MF	MF
BepaF2_8_21	MF	MF	MF	MF	MF	MF	MF	MF	MF	MF	MF	MF	MF	MF	MF	MF	MF	MF	MF	MF	MF	MF	MF	MF	MF	MF	MF	MF	MF	MF	MF	MF	MF	MF	MF	MF	MF	MF	MF	MF	MF	MF	MF	MF	MF	MF	MF	MF	MF
BepaF2_8_22	MF	MF	MF	MF	MF	MF	MF	notFF	MF	MF	MF	MF	MF	MF	MF	MF	MF	MF	MF	MF	MF	MF	MF	MF	MF	MF	MF	MF	MF	MF	MF	MF	MF	MF	MF	MF	MF	MF	MF	MF	MF	MF	MF	MF	MF	MF	MF	MF	MF
BepaF2_8_23	MF	MF	MF	MF	MF	MF	MF	MF	MF	MF	MF	FF	FF	FF	FF	FF	FF	FF	FF	FF	FF	FF	FF	FF	FF	FF	FF	FF	FF	FF	FF	FF	FF	FF	FF	FF	FF	FF	FF	FF	FF	FF	FF	FF	FF	FF	FF	FF	FF
BepaF2_8_24	MF	MF	notFF	MF	MF	MF	MF	MF	MF	MF	notFF	MF	MF	MF	MF	MF	MF	MF	MF	MF	MF	MF	MF	MF	MF	MF	MF	MF	MF	MF	MF	MF	MF	MF	MF	MF	MF	MF	MF	MF	MF	MF	MF	MF	MF	MF	MF	MF	MF
BepaF2_8_25	MF	MF	MF	MF	MF	MF	MF	MF	MF	MF	MF	MF	MF	MF	MF	MF	MF	MF	MF	MF	MF	MF	MF	MF	MF	MF	MF	MF	MF	MF	MF	MF	MF	MF	MF	MF	MF	MF	MF	MF	MF	MF	MF	MF	MF	MF	MF	MF	MF
BepaF2_8_26	MM	MM	MM	MM	MM	MM	MM	MM	MM	MM	MF	MF	MF	MF	MF	MF	MF	MF	MF	MF	MF	MF	MF	MF	MF	MF	MF	MF	MF	MF	MF	MF	MF	MF	MF	MF	MF	MF	MF	MF	MF	MF	MF	MF	MF	MF	MF	MF	MF
BepaF2_8_27	MF	MF	MF	MF	MF	MF	MF	MM	MM	MM	MM	MM	MM	MM	MM	MM	MM	MF	MF	MF	MF	MF	MF	MF	MF	MF	MF	MF	MF	MF	MF	MF	MF	MF	MF	MM	MM	MM	MM	MM	MM	MM	MM	MM	MM	MM	MM	MF	MF
BepaF2_8_28	MM	MM	MM	MM	MM	MM	MM	MM	MM	MM	MM	MM	MM	MM	MM	MM	MM	MM	MM	MM	MM	MM	MM	MM	MM	MM	MM	MM	MM	MM	MM	MM	MM	MM	MM	MM	MM	MM	MM	MM	MM	MM	MM	MM	MM	MM	MM	MM	MM
BepaF2_8_29	MF	MF	MF	MF	MF	MF	MF	MF	MF	MF	MF	MF	FF	FF	FF	FF	FF	FF	FF	FF	FF	FF	FF	FF	FF	FF	FF	FF	FF	FF	FF	FF	FF	FF	FF	FF	FF	FF	FF	FF	FF	FF	FF	FF	FF	FF	notMM	FF	FF
BepaF2_8_30	MF	MF	MF	MF	MF	MF	MF	MF	MF	MF	MF	MF	MF	MF	MF	MF	MF	MF	MF	MF	MF	MF	MF	MM	MM	MM	MM	MM	MM	MF	MM	MF	MM	MM	MF	MF	MF	MF	MF	MF	MF	MF	MF	MF	MF	MF	MF	MF	MF
BepaF2_8_31	MF	MF	MF	MF	MF	MF	MF	MF	MF	MF	FF	MF	MF	MF	MF	MF	MM	MM	MM	MM	MM	MM	MM	MM	MM	MM	MM	MM	MM	MM	MM	MM	MM	MM	MM	MM	MM	MM	MM	MM	MM	MM	MM	MM	MM	MM	MM	MM	MM
BepaF2_8_32	FF	FF	FF	FF	FF	FF	FF	FF	FF	FF	FF	FF	FF	FF	FF	FF	MF	MF	MF	MF	MF	MF	MF	MF	MF	MF	MF	MF	MF	MF	MF	MF	MF	MF	MF	MF	MF	MF	MF	MF	MF	MF	MF	MF	MF	MF	MF	MF	MF
BepaF2_8_33	MF	MF	MF	MF	MF	MF	MF	MF	MF	MF	MF	MF	MF	MF	MF	MF	MF	MF	MF	MF	MF	MF	MF	MF	MF	MF	MF	MF	MF	MF	MF	MF	MF	MF	MF	MF	MF	MF	MF	MF	MF	MF	MF	MF	MF	MF	MF	MF	MF
BepaF2_8_34	MM	MM	MM	MM	MM	MM	MM	MM	MM	MM	MM	MM	MM	MM	MM	MM	MM	MM	MM	MM	MM	MM	MM	MM	MM	MM	MM	MM	MM	MM	MM	MM	MM	MM	MF	MF	MF	MF	MF	MF	MF	MF	MF	MF	MF	MF	MF	MF	MF
BepaF2_8_35	FF	FF	FF	FF	FF	FF	FF	FF	FF	FF	FF	FF	FF	FF	FF	FF	FF	FF	FF	FF	FF	FF	FF	FF	FF	FF	FF	FF	FF	FF	FF	FF	FF	FF	FF	FF	FF	FF	FF	FF	FF	FF	FF	FF	FF	FF	FF	FF	FF
BepaF2_8_37	FF	FF	FF	FF	FF	FF	FF	FF	FF	FF	notMM	FF	FF	MF	MF	MF	MF	MF	MF	MF	MF	MF	MF	MF	MF	MF	MF	MF	MF	MF	MF	MF	MF	MF	MF	MF	MF	MF	MF	MF	MF	MF	MF	MF	MF	MF	notMM	MF	MF
BepaF2_8_38	MM	MM	MM	MM	MM	MM	MM	MM	MM	notFF	notFF	MM	MM	MM	MM	MF	MF	MF	MF	MF	MF	MF	MF	MF	MF	MF	MF	MF	MF	MF	MF	MF	MF	FF	MF	MF	MF	MF	MF	MF	MF	MF	MF	MF	MF	MF	NA	MF	MF
BepaF2_8_39	FF	FF	notMM	FF	FF	FF	FF	FF	FF	FF	notMM	FF	FF	FF	FF	FF	FF	FF	FF	FF	FF	FF	FF	FF	FF	FF	FF	FF	FF	FF	FF	FF	FF	FF	FF	FF	FF	FF	FF	FF	FF	FF	FF	FF	FF	FF	notMM	FF	FF
BepaF2_8_40	notMM	MF	notMM	notFF	MF	notMM	MF	notFF	notMM	notFF	MF	MF	MM	MM	MM	MM	MM	MM	MM	MM	MM	MM	MF	MF	MF	MF	MF	MF	MF	MF	MF	MF	MF	MF	MF	MF	MF	MF	MF	MF	MF	MF	MF	MF	notFF	notMM	MF	MF	MF
BepaF2_8_41	MF	MF	MF	MF	MF	MF	MF	MF	notMM	MF	notFF	MF	MF	MF	FF	FF	FF	FF	MF	MF	MF	MF	MF	MF	MF	MF	MF	MF	MF	MF	MF	MF	MF	MF	MF	MF	MF	MF	MF	MF	MF	MF	MF	MF	MF	MF	MF	MF	MF
BepaF2_8_42	MM	MM	notFF	MM	MM	MM	MM	MM	notFF	NA	NA	MM	MM	MM	MM	MM	MM	MM	MM	MM	MM	MM	MM	MM	MM	MM	MM	MM	MM	MM	MM	MM	MM	MM	MM	MM	MM	MM	MM	MF	MF	MF	MF	MF	MF	MF	MF	MF	MF
BepaF2_8_43	MF	MF	notFF	MF	MF	MF	MF	MF	MF	MF	notFF	MF	MF	MF	MF	MF	MF	MF	MF	MF	MF	MF	MF	MF	MF	MF	MF	MF	MF	MF	MF	MF	MF	MF	MF	MF	MF	MF	MF	MF	MF	MF	MF	MF	MF	MF	MF	MF	MF
BepaF2_9_1	FF	FF	notMM	FF	FF	FF	FF	FF	notMM	FF	notMM	FF	FF	MF	MF	MF	MF	MF	MF	MF	MF	MF	MF	MF	MF	MF	MF	MF	MF	MF	MF	MF	MF	MF	MF	MF	MF	notFF	MF	MF	MF	MF	MF	MF	MF	MF	MF	MF	MF
BepaF2_9_2	FF	FF	notMM	FF	FF	FF	FF	FF	FF	notMM	notMM	FF	FF	FF	FF	FF	FF	FF	FF	FF	FF	FF	FF	FF	FF	FF	FF	FF	FF	FF	FF	FF	FF	FF	FF	FF	FF	FF	FF	FF	FF	FF	FF	FF	FF	notMM	NA	FF	FF
BepaF2_9_3	notFF	MM	NA	MM	MM	MM	MM	MM	MM	notFF	NA	MM	MM	MM	MM	MM	MM	MM	MM	MM	MM	MM	MM	MM	MM	MM	MM	MM	MM	MM	MM	MM	MM	MM	MM	MM	MM	MM	MM	MM	MM	MM	MM	MM	MM	MM	notFF	MM	MM
BepaF2_9_4	notMM	FF	NA	FF	FF	FF	FF	FF	notMM	notMM	notMM	FF	FF	FF	FF	FF	FF	FF	FF	FF	FF	FF	FF	FF	FF	FF	FF	FF	FF	FF	FF	FF	FF	FF	FF	FF	FF	FF	FF	FF	FF	FF	FF	FF	FF	FF	notMM	FF	FF
BepaF2_9_5	notFF	MM	notFF	MM	MM	MM	MM	notFF	notFF	notFF	NA	MM	MM	MM	MM	MM	MF	MF	MF	MF	MF	MF	notMM	MF	MF	MF	MF	MF	MF	MF	MF	MF	MF	notFF	MF	MF	MF	MF	MF	MF	MF	MF	MF	MF	notMM	notFF	MF	notFF	MF
BepaF2_9_6	notFF	notFF	notFF	MM	MM	MM	MM	MM	notFF	notFF	NA	MM	MM	MM	MM	MM	MM	MM	MM	notFF	MF	MF	MF	MF	MF	MF	MF	MF	MF	MF	MF	MF	MF	MF	MF	MF	MF	NA	MF	MF	MF	MF	MF	MF	MF	notMM	notFF	MF	MF
BepaF2_9_7	MF	MF	MF	MF	MF	MF	MF	MF	notFF	MF	NA	MM	MM	MM	MM	MM	MM	MM	MM	MM	notMM	MF	MF	MF	MF	MF	MF	MF	MF	MF	MF	MF	MF	MF	MF	MF	MF	MF	MF	MF	MF	MF	MF	MF	MF	MF	MF	notFF	MF
BepaF2_9_8	notMM	NA	notMM	notMM	MF	notFF	MF	notFF	notMM	notFF	NA	FF	MF	MF	MF	MF	MF	MF	MF	MF	notFF	notMM	notMM	notMM	FF	FF	FF	FF	FF	notMM	FF	FF	FF	NA	notMM	FF	FF	notMM	notMM	notMM	FF	FF	FF	FF	notMM	notMM	NA	notMM	FF
BepaF2_9_9	MM	MM	notFF	MM	MM	MM	MM	MM	MM	MM	notMM	MF	MF	MF	MF	MF	MF	MF	MF	MF	MF	MF	MF	MF	MF	MF	MF	MF	MF	MF	MF	MF	MF	MF	MF	MF	MF	MF	MF	MF	MF	MF	MF	MF	MF	MF	notFF	MF	MF
BepaF2_9_10	FF	FF	FF	FF	FF	FF	FF	FF	FF	FF	notMM	FF	FF	FF	FF	FF	FF	FF	FF	FF	FF	FF	FF	FF	FF	FF	FF	FF	FF	FF	FF	FF	FF	FF	FF	FF	FF	FF	FF	FF	MF	MF	MF	MF	MF	MF	notFF	MF	MF
BepaF2_9_11	FF	FF	FF	FF	FF	MF	MF	MF	MF	MF	notMM	MF	MF	MF	MF	MF	MF	MF	MF	MF	MF	MF	MF	MF	MF	MF	MF	MF	MF	MF	MF	MF	MF	MF	MF	MF	MF	MF	MF	MF	MF	MF	MF	MF	MF	MF	MF	MF	MF
BepaF2_9_12	notFF	MF	notFF	notFF	MF	MF	MF	MF	MF	notFF	NA	MF	MF	MF	MF	MF	MF	notFF	MF	MF	notMM	MF	MF	notMM	MF	MF	MF	MF	MF	notMM	MF	MF	MF	MF	MF	MF	notFF	MF	MF	MM	MF	MF	MF	MF	MF	notFF	notMM	MF	MF
BepaF2_9_13	notFF	MF	NA	notFF	MF	notFF	MF	notFF	notFF	NA	NA	MF	MF	MF	notMM	MF	notMM	MF	notMM	notFF	MF	NA	MF	MF	MF	notMM	notMM	MF	FF	MF	MF	MF	FF	notMM	notMM	MF	MF	notMM	FF	notMM	FF	FF	FF	FF	FF	notMM	MF	FF	FF
BepaF2_9_14	FF	FF	notMM	FF	FF	FF	FF	FF	notMM	FF	notMM	FF	FF	FF	FF	FF	FF	FF	FF	FF	FF	FF	FF	FF	FF	FF	FF	FF	FF	FF	FF	FF	FF	FF	FF	FF	FF	FF	FF	FF	FF	FF	FF	FF	FF	FF	notMM	FF	FF
BepaF2_9_15	MM	MM	notFF	notFF	notFF	MM	MM	MM	notFF	notFF	notFF	MM	MM	MM	MM	MM	MM	MM	MM	MM	MM	MM	notFF	MM	MM	MM	MM	MM	MM	MM	MM	MM	MM	notFF	MM	MF	MF	MF	MF	MF	MF	MF	notMM	MF	notMM	MF	notMM	MF	MF
BepaF2_9_16	FF	FF	notMM	FF	FF	FF	FF	FF	FF	FF	notMM	FF	MF	MF	MF	MF	MF	MF	MF	MF	MF	MF	MF	MF	MF	MF	MF	MF	MF	MF	MF	MF	MF	MF	MF	MF	MF	MF	MF	MF	MF	MM	MM	MM	MM	MM	MM	MM	MM
BepaF2_9_17	MF	MF	MF	MF	MF	MF	MF	MF	FF	FF	notMM	FF	FF	FF	FF	FF	FF	FF	FF	FF	FF	FF	FF	FF	FF	FF	FF	FF	FF	FF	FF	FF	FF	FF	FF	FF	FF	FF	FF	FF	FF	FF	FF	FF	FF	FF	FF	FF	FF
BepaF2_9_18	FF	FF	notMM	FF	FF	FF	FF	FF	notMM	notMM	notMM	FF	FF	FF	FF	FF	FF	FF	FF	FF	FF	notMM	notMM	FF	FF	FF	FF	FF	FF	FF	FF	FF	FF	notMM	FF	FF	FF	FF	FF	FF	FF	FF	FF	FF	FF	FF	notMM	FF	FF
BepaF2_9_19	MF	MF	MF	MF	MF	MF	MF	notMM	MF	notFF	MF	MF	MF	FF	FF	FF	FF	FF	FF	FF	FF	FF	FF	FF	FF	FF	FF	FF	FF	FF	FF	FF	FF	FF	FF	FF	FF	FF	FF	FF	FF	FF	FF	FF	FF	FF	FF	FF	FF
BepaF2_9_20	MF	MF	NA	MF	MF	notMM	MF	MF	MF	notFF	notMM	MF	MF	MF	MF	MF	MF	MF	notMM	MF	MF	MF	notMM	MF	MF	MF	MF	MF	MF	MF	MF	MF	MF	MF	MF	MF	MF	notMM	MF	MF	MF	notFF	MF	MF	MF	MF	notFF	MF	MF
BepaF2_9_21	notFF	MF	NA	notMM	MF	notMM	notMM	MF	notFF	NA	NA	MF	MF	MF	MF	MF	MF	FF	notMM	notMM	FF	notMM	FF	notMM	FF	FF	FF	FF	FF	FF	FF	FF	FF	notMM	FF	FF	notMM	FF	notMM	notMM	FF	FF	notMM	FF	FF	notMM	notMM	notMM	FF
BepaF2_9_22	NA	NA	NA	notMM	notFF	notFF	notMM	notFF	NA	notMM	NA	MF	MF	MF	MF	MF	MF	MF	notFF	MF	MF	notFF	notFF	notFF	MM	MM	MM	MM	notFF	notFF	MM	MM	MM	notFF	notFF	notFF	NA	NA	notFF	NA	MM	MM	notFF	notFF	notFF	notFF	notFF	notFF	notFF
BepaF2_9_23	notMM	notMM	notMM	notMM	FF	notFF	MF	notFF	notMM	notFF	NA	MF	MF	notFF	MF	notFF	MF	notMM	MF	notMM	notMM	FF	notFF	MF	MF	MF	MF	MF	MF	MF	notMM	MF	MF	NA	MF	MF	MF	MF	MF	notFF	MF	MF	MF	MF	MF	MF	MM	notMM	MF
BepaF2_9_24	notMM	MF	notFF	notMM	MF	notMM	MF	NA	NA	notMM	NA	MF	MF	MF	MF	MF	MF	MF	notMM	MF	MF	notFF	notMM	notFF	MF	MF	MF	MF	MF	MF	MF	MF	MF	MF	MF	MF	FF	notMM	notFF	notFF	MF	MF	notMM	MF	MF	MF	NA	MF	MF
BepaF2_9_25	notMM	notFF	MF	MF	MF	MF	MF	MF	NA	notMM	notFF	MF	MF	MF	MF	MF	MF	MF	MF	notFF	notFF	MF	notMM	notFF	MF	MF	MF	MF	MF	MF	MF	MF	MF	notFF	MF	MF	MF	MF	notMM	MF	MF	MF	MF	notMM	MF	notMM	notFF	FF	MF
BepaF2_9_26	notFF	MF	notFF	MF	MF	MF	MF	notMM	notMM	notMM	NA	notMM	FF	FF	MF	MF	MF	notFF	MF	MF	MF	notFF	notMM	MF	MF	MF	MF	MF	MF	MF	notFF	MF	MF	MM	MF	MF	notFF	MF	MF	notFF	MF	MF	notFF	MF	MF	notFF	NA	MF	MF
BepaF2_9_27	NA	MF	NA	notFF	MF	notFF	notFF	NA	NA	NA	MF	MF	MF	notFF	MF	notMM	NA	notMM	notFF	notMM	notMM	notFF	notFF	MF	MF	MF	MF	MF	MF	MF	MF	MF	MF	NA	MF	notFF	notMM	notFF	MF	notMM	MF	notFF	MF	MF	notFF	MF	NA	notMM	MF
BepaF2_9_28	MF	notFF	MF	MF	MF	MF	MF	MF	MF	NA	NA	MF	MF	MF	MF	MF	MF	MF	MF	MF	MF	MF	MM	MM	MM	MM	MM	MM	MM	MM	MM	MM	MM	notFF	MM	MM	notFF	notFF	MM	MM	MM	MM	MM	MM	MM	MM	notFF	notFF	MM
BepaF2_9_29	FF	FF	FF	FF	FF	FF	FF	FF	FF	FF	FF	FF	FF	FF	FF	FF	FF	FF	FF	FF	FF	FF	FF	FF	FF	FF	FF	FF	FF	FF	FF	FF	FF	FF	FF	FF	FF	FF	FF	FF	FF	FF	FF	FF	FF	FF	FF	FF	FF
[truncated: 929 more columns]

## Sheet: Phenotypes
id	SL	Sex	AvgPlates	LateralGRLength	MiddleGRLength	MedialGRLength	LateralGRLength_SLadjusted	MiddleGRLength_SLadjusted	MedialGRLength_SLadjusted
BepaF2_1_1	38.41	M	34	1073.9	740.5	615.4	1168.8	831.2	679
BepaF2_1_2	35.5	M	32	812.7	737.4	462.1	986.4	903.4	578.5
BepaF2_1_3	34.75	M	33	949.3	817.9	532.2	1143.3	1003.3	662.2
BepaF2_1_4	31.81	M	8	737.9	599.2	324.5	1011.5	860.6	507.9
BepaF2_1_5	40.02	M	32.5	1064.4	909	574.1	1115.7	958	608.5
BepaF2_1_6	42.23	M	33.5	1442.8	1192.6	719.6	1434.3	1184.5	713.9
BepaF2_1_7	37.97	F	7	964	876.6	586.1	1070.8	978.7	657.7
BepaF2_1_8	35.65	F	33.5	1084.8	855.1	627.5	1254.5	1017.2	741.2
BepaF2_1_9	39.82	M	32.5	1088	1066.5	677.2	1144.8	1120.7	715.2
BepaF2_1_10	36.91	M	11	854.6	776.6	532.7	990.1	906.1	623.5
BepaF2_1_11	40.29	F	8	965.5	924.7	676.1	1009.5	966.8	705.6
BepaF2_1_12	38.37	F	10	1024.7	823.2	572.5	1120.7	914.9	636.9
BepaF2_1_13	38.96	F	33	920.5	700.2	549.5	1000.5	776.7	603.1
BepaF2_1_14	40.74	F	11.5	894.9	811.1	677.7	926.7	841.5	699
BepaF2_1_15	36.26	F	33	1060.2	1020.5	536.9	1213.3	1166.8	639.5
BepaF2_1_16	40.04	M	9	995.4	1195.8	623.3	1046.2	1244.3	657.3
BepaF2_1_17	35.79	M	32.5	898.5	815.3	487.2	1064.4	973.8	598.4
BepaF2_1_18	34.6	M	13	1045.6	978.1	449.5	1243.7	1167.4	582.3
BepaF2_1_19	36.51	M	7	1056.6	906.9	581.9	1203	1046.8	680
BepaF2_1_20	34.36	M	9	916.9	873.4	594	1121.5	1068.9	731.1
BepaF2_1_21	41.62	M	32.5	1016.3	946.7	497.7	1024.3	954.4	503.1
BepaF2_1_22	39.22	M	33	941.5	914.2	570.4	1014.5	983.9	619.3
BepaF2_1_23	39.18	F	34	945.6	698.6	506	1019.7	769.4	555.7
BepaF2_1_24	38.69	M	33.5	1033	882.3	612.3	1120.3	965.8	670.8
BepaF2_1_25	43.58	F	33	1050.3	1015.2	602.9	1005.2	972.1	572.7
BepaF2_1_26	41	F	32	1021.5	1038.3	598.2	1046.3	1062	614.8
BepaF2_1_27	36.62	M	8.5	932	854.1	594	1075.4	991.1	690.1
BepaF2_1_28	41.65	F	10	1127.2	999	666.7	1134.4	1005.9	671.5
BepaF2_1_29	37.04	M	32.5	964.5	839.4	588.2	1096.5	965.5	676.7
BepaF2_1_30	41.16	M	33	1221.4	1112.1	653.1	1241.9	1131.7	666.8
BepaF2_1_31	37.02	M	33.5	892.8	743.1	426	1025.4	869.8	514.8
BepaF2_1_32	37.72	F	33.5	1167	1166	586.1	1280.6	1274.5	662.2
BepaF2_1_33	40.87	M	34	1103.2	998	687.6	1131.5	1025.1	706.6
BepaF2_1_34	38.19	F	33.5	974.9	753.6	421.8	1075.8	850	489.4
BepaF2_1_35	37.15	F	32	884.4	801.7	414.5	1013.4	925	501
BepaF2_1_36	37.18	M	32.5	822.7	844.6	590.3	950.9	967.1	676.2
BepaF2_1_37	35.19	F	9.5	936.7	690.8	409.8	1118.8	864.8	531.9
BepaF2_1_38	37.28	F	32.5	1023.6	876	491.4	1149.1	995.9	575.5
BepaF2_1_39	35.48	F	31.5	859.8	962.9	422.3	1034.1	1129.4	539.1
BepaF2_1_40	42.57	F	32	1247.1	1095.3	716.9	1229.4	1078.4	705
BepaF2_1_41	35.79	F	31.5	802.2	737.9	406.6	968.1	896.4	517.8
BepaF2_1_42	34.68	F	33.5	829.5	774	328.6	1025.4	961.2	459.9
BepaF2_1_43	37.32	M	33.5	1193.2	1071.2	754.1	1317.6	1190.1	837.5
BepaF2_1_44	37.21	M	33.5	942	912.1	642.1	1069.4	1033.8	727.5
BepaF2_1_45	40.78	F	32.5	1099.5	1017.9	602.9	1130.3	1047.3	623.5
BepaF2_1_46	33.67	M	30	894.4	824.8	514.9	1117.7	1038.1	664.5
BepaF2_1_47	35.26	F	32.5	NA	887	648.4	NA	1059.2	769.2
BepaF2_1_48	38.67	M	32.5	965	957.2	581.9	1052.9	1041.2	640.8
BepaF2_1_49	39.88	F	30	1039.3	892.8	602.9	1094.4	945.5	639.8
BepaF2_1_50	36.03	M	33.5	939.9	764.6	474.1	1099.3	916.9	580.9
BepaF2_1_51	43.89	F	32	1065.5	1059.2	628	1012	1008.1	592.2
BepaF2_1_52	37.69	F	8.5	1039.3	867.1	490.3	1153.7	976.4	567
BepaF2_1_53	40.21	M	32.5	1339.2	1002.7	683.5	1385.4	1046.8	714.5
BepaF2_1_54	34.92	M	31.5	1041.4	843.1	576.7	1230.8	1024.1	703.7
BepaF2_1_55	44.39	F	32	1343.4	1237.6	837.8	1276.4	1173.6	792.9
BepaF2_1_56	34.34	F	32.5	750.4	713.8	402.4	955.5	909.8	539.9
BepaF2_1_57	34.45	F	32.5	817.9	756.7	467.8	1020.1	949.8	603.3
BepaF2_1_58	29.93	M	28.5	894.4	801.7	514.9	1218.9	1111.8	732.4
BepaF2_1_59	38.92	M	8	1082.2	949.8	619.1	1163.3	1027.3	673.5
BepaF2_1_60	36.18	F	33.5	971.3	827.4	596.1	1126.6	975.8	700.2
BepaF2_1_61	38.37	F	32.5	1035.1	999	619.6	1131.1	1090.7	684
BepaF2_1_62	38.85	F	33	1123	931.5	544.3	1206	1010.8	599.9
BepaF2_1_63	32.14	F	11.5	752	777.1	431.7	1016.7	1030	609.1
BepaF2_1_64	42.79	M	32	NA	NA	NA	NA	NA	NA
BepaF2_1_65	45.07	M	33.5	1135.1	1070.7	625.9	1049.7	989.1	568.7
BepaF2_1_66	35.45	M	32.5	1017.9	902.7	619.1	1193	1070	736.4
BepaF2_1_67	41.28	F	32	1168.6	1018.9	527.5	1185.8	1035.3	539
BepaF2_1_68	27.88	M	7	562.6	511.8	NA	942.7	874.9	NA
BepaF2_1_69	30.45	F	32.5	737.4	806.4	466.3	1047.9	1103	674.4
BepaF2_1_70	41.24	F	32.5	NA	1305.7	621.2	NA	1323.2	633.5
BepaF2_1_71	32.3	F	32	758.8	625.4	361.1	1019.2	874.2	535.6
BepaF2_2_1	42.36	M	22.5	1126.2	1061.3	737.4	1114.2	1049.8	729.3
BepaF2_2_2	40.72	M	32	1436.5	1145.5	746.8	1468.9	1176.4	768.5
BepaF2_2_3	42.39	M	23	1182.2	1172.8	729	1169.4	1160.5	720.4
BepaF2_2_4	35.32	M	26	976	887	569.9	1154.6	1057.6	689.6
BepaF2_2_5	37.36	M	7.5	1032.5	1000.1	668.3	1155.9	1118	751
BepaF2_2_6	39.37	M	34	1213.1	1047.2	595.5	1282	1113.1	641.7
BepaF2_2_7	38.57	F	32	1015.2	1029.4	613.9	1105.8	1116	674.6
BepaF2_2_8	30.99	M	33	925.2	754.1	611.2	1221	1036.8	809.5
BepaF2_2_9	37.74	M	26	1063.4	1107.9	703.9	1176.5	1215.9	779.7
BepaF2_2_10	32.36	F	31.5	843.6	NA	524.4	1102.3	NA	697.8
BepaF2_2_11	39.15	M	33	1188.5	1152.9	675.6	1263.4	1224.5	725.8
BepaF2_2_12	36.36	M	33	1185.3	1159.2	NA	1335.7	1302.9	NA
BepaF2_2_13	37.77	F	31	1220.9	1196.3	681.4	1333.2	1303.6	756.6
BepaF2_2_14	44.26	M	33	1543.8	1449.1	887	1480.3	1388.5	844.5
BepaF2_2_15	37.51	M	32	1223.5	1168.6	753.6	1342.8	1282.6	833.6
BepaF2_2_16	36.02	F	33	1156	997.4	610.2	1315.6	1149.9	717.2
BepaF2_2_17	38.24	M	31.5	1188.5	1191.1	618.6	1288	1286.2	685.3
BepaF2_2_18	39.59	M	32.5	1047.2	1116.8	772.9	1110.2	1177	815.1
BepaF2_2_19	40.85	M	6.5	1168	1131.9	771.4	1196.9	1159.5	790.7
BepaF2_2_20	34.13	F	33	1021.5	934.6	662.5	1232.3	1136	803.8
BepaF2_2_21	39.3	M	6.5	1016.8	923.7	709.1	1087.6	991.4	756.6
BepaF2_2_22	37.32	F	32.5	1178	1096.4	617	1302.4	1215.3	700.4
BepaF2_2_23	39.28	M	32	1157.1	1148.2	623.8	1228.5	1216.4	671.6
BepaF2_2_24	39.84	F	27.5	1410.9	1172.8	678.7	1467.1	1226.5	716.4
BepaF2_2_25	37.3	F	7	950.3	819	620.7	1075.3	938.4	704.5
BepaF2_2_26	40.95	M	7	1203.1	NA	878.7	1229.3	NA	896.2
BepaF2_2_27	33.6	M	7	905.3	870.8	700.2	1130.5	1085.9	851.1
BepaF2_2_28	39.81	F	7	1067	1047.2	776.1	1124	1101.7	814.3
BepaF2_2_29	41.76	M	32.5	1300.4	1257.5	721.1	1304.6	1261.5	723.9
BepaF2_2_30	38.12	F	33	1160.7	999	532.2	1263.5	1097.2	601.1
BepaF2_2_31	40.02	M	33	1212.5	1016.8	741.5	1263.8	1065.8	775.9
BepaF2_2_32	32.8	F	33	866.1	809.6	444.8	1112.9	1045.4	610.2
BepaF2_2_33	36.94	M	33	1160.7	1079.1	649.4	1295.4	1207.8	739.7
BepaF2_2_34	37.87	M	28	1009.5	971.8	551.1	1119.1	1076.5	624.5
BepaF2_2_35	36.39	F	29.5	1102.1	960.8	NA	1251.7	1103.8	NA
BepaF2_2_36	42.99	M	34	1318.8	1195.3	779.7	1289.7	1167.5	760.2
BepaF2_2_37	36.39	F	31.5	962.9	918.9	630.1	1112.5	1061.9	730.4
BepaF2_2_38	35.6	F	32	1114.7	932	679.3	1285.7	1095.4	793.9
BepaF2_2_39	40.11	M	6	1135.1	965.5	735.8	1184	1012.2	768.6
BepaF2_2_40	38.46	M	32.5	1208.9	1071.8	734.7	1302.5	1161.2	797.4
BepaF2_2_41	39.78	F	26.5	1035.6	819	585.1	1093.4	874.3	623.9
BepaF2_2_42	35.59	F	7	982.3	852.5	628.5	1153.6	1016.2	743.3
BepaF2_2_43	36.48	F	32.5	987.5	907.4	651.5	1134.7	1048	750.1
BepaF2_2_44	32.84	F	31.5	1166.5	809.6	476.7	1412.3	1044.4	641.4
BepaF2_2_45	38.6	M	32.5	1145.5	1077	670.9	1235.3	1162.8	731.1
BepaF2_2_46	36.4	F	31.5	1024.1	876	568.8	1173.5	1018.7	668.9
BepaF2_2_47	33.48	F	32	912.7	849.9	522.8	1141.1	1068.1	675.9
BepaF2_2_48	31.87	M	33	914.8	754.6	565.2	1186.8	1014.5	747.5
BepaF2_2_49	36.44	F	33	961.9	778.2	571.5	1110.2	919.9	670.9
BepaF2_2_50	33.17	M	31.5	991.7	795.4	609.7	1228.5	1021.7	768.4
BepaF2_3_1	37.87	M	34	999	863.5	600.2	1108.6	968.2	673.6
BepaF2_3_2	39.86	M	33	1210.4	1048.2	542.7	1266.1	1101.4	580
BepaF2_3_3	39.19	F	33	NA	772.9	563.1	NA	843.4	612.6
BepaF2_3_4	39.36	F	32.5	1031.5	899.6	563.6	1100.7	965.7	610
BepaF2_3_5	31.6	F	6.5	714.3	641.1	493.5	993.6	908	680.7
BepaF2_3_6	46.18	M	34	1160.2	1054.5	721.7	1044.7	944.2	644.3
BepaF2_3_7	34.95	M	32	954	909.5	566.2	1142.6	1089.7	692.6
BepaF2_3_8	36.8	F	32	1048.7	873.9	529.1	1187.2	1006.2	621.9
BepaF2_3_9	36.41	M	33	869.8	895.4	528.6	1018.9	1037.8	628.5
BepaF2_3_10	40.26	M	33.5	1150.3	1050.8	800.2	1195.1	1093.6	830.3
BepaF2_3_11	40.54	F	33	1065.5	988.5	531.7	1102.8	1024.1	556.7
BepaF2_3_12	43.47	F	33	1033	1066	464.7	990.9	1025.8	436.5
BepaF2_3_13	40.89	F	10	1051.9	973.4	641.6	1079.7	999.9	660.2
BepaF2_3_14	41.06	F	34.5	884.9	754.1	502.9	908.1	776.2	518.4
BepaF2_3_15	43.7	M	33.5	1246	1091.6	853	1197.7	1045.4	820.6
BepaF2_3_16	37.9	F	33	868.7	825.3	552.6	977.4	929.2	625.5
BepaF2_3_17	41.17	F	32.5	1093.7	1029.9	638.4	1113.9	1049.2	651.9
BepaF2_3_18	34.94	M	31.5	848.3	708.6	307.7	1037.2	889.1	434.3
BepaF2_3_19	37.39	F	33	716.9	667.2	437	839.4	784.3	519.1
BepaF2_3_20	38.88	M	27	883.4	833.1	483.5	965.6	911.6	538.6
BepaF2_3_21	34.94	F	33	759.3	778.2	332.8	948.2	958.7	459.4
BepaF2_3_22	37.49	F	32.5	842	768.2	453.7	961.8	882.7	534
BepaF2_3_23	38.97	F	34	1041.4	962.9	734.2	1121.2	1039.1	787.7
BepaF2_3_24	34.53	F	32	868.7	808.5	538	1068.7	999.6	672
BepaF2_3_25	36.12	M	32.5	958.2	723.8	489.8	1115.1	873.7	595
BepaF2_3_26	33.03	M	31.5	852	738.9	560	1092.6	968.8	721.3
BepaF2_3_27	36.91	M	8	851.4	757.8	485.1	986.9	887.3	575.9
BepaF2_3_28	37.65	F	33.5	966.6	721.1	578.3	1082.1	831.5	655.7
BepaF2_3_29	37.55	M	34	987.5	890.2	662	1105.7	1003.1	741.2
BepaF2_3_30	37.2	M	32.5	1039.8	960.3	525.4	1167.5	1082.3	611
BepaF2_3_31	37.77	M	37.5	937.3	824.8	500.3	1049.6	932.1	575.5
BepaF2_3_32	38.55	F	9	883.4	872.9	574.1	974.5	960	635.2
BepaF2_3_34	36.76	F	32	938.3	967.1	693.9	1077.9	1100.5	787.5
BepaF2_3_35	36.59	M	33	1109.4	947.7	674.6	1253.6	1085.5	771.3
BepaF2_3_36	35.88	M	34	686.1	714.9	514.9	849.5	871	624.4
BepaF2_3_37	38.45	F	32	914.2	841.5	578.8	1008	931.2	641.7
BepaF2_3_38	34.59	M	33.5	835.7	758.8	452.1	1034.1	948.3	585
BepaF2_3_40	34.92	F	31.5	NA	620.7	384.1	NA	801.7	511.1
BepaF2_3_42	36.2	M	32	742.6	790.7	571.5	897.4	938.6	675.2
BepaF2_3_43	36.51	F	31	977.6	908.5	603.9	1124	1048.4	702
BepaF2_3_44	37.67	F	31.5	910.1	830.5	554.2	1025.1	940.3	631.3
BepaF2_3_46	29.93	F	30.5	612.3	494.5	303.5	936.8	804.6	521
BepaF2_3_47	37.73	M	33.5	957.2	828.9	676.7	1070.5	937.2	752.7
BepaF2_3_48	35.94	M	33	931.5	844.6	643.7	1093.3	999.2	752.1
BepaF2_3_49	30.65	M	31	704.9	626.4	410.3	1010	917.9	614.8
BepaF2_4_1	44.74	M	10.5	1049.3	977.6	818.5	972.8	904.5	767.2
BepaF2_4_2	46.47	M	32.5	1063.9	1123	734.7	940.6	1005.2	652.1
BepaF2_4_3	42.97	F	31.5	934.1	713.8	394.1	905.6	686.5	375
BepaF2_4_4	48.11	F	32	1346	1167	854.1	1178.3	1006.8	741.7
BepaF2_4_5	42.19	F	8.5	1199.4	1178	912.1	1192	1170.9	907.1
BepaF2_4_6	43.41	M	31.5	1134.6	1048.7	612.8	1094.1	1010	585.7
BepaF2_4_7	42.71	M	25.5	1108.9	1140.8	758.8	1087.4	1120.3	744.4
BepaF2_4_8	42.77	F	32	1177.5	1022	787.1	1154.4	999.9	771.6
BepaF2_4_9	45.47	F	8	925.8	773.5	637.9	829.6	681.6	573.4
BepaF2_4_10	47.91	F	32	1195.8	1018.9	677.7	1033.5	863.8	568.9
BepaF2_4_11	46.02	F	32	1326.6	1163.9	695	1215.5	1057.7	620.5
BepaF2_4_12	49.06	F	33	1250.7	1180.6	879.2	1057.3	995.8	749.5
BepaF2_4_13	45.25	M	6	1215.7	1157.1	804.9	1125.4	1070.8	744.4
BepaF2_4_14	44.47	M	33.5	1235	1117.3	903.2	1165.8	1051.2	856.8
BepaF2_4_15	43.34	F	32	1232.4	984.4	626.4	1193.8	947.6	600.6
BepaF2_4_16	43.2	F	31	981.2	848.8	585.6	946.4	815.6	562.3
BepaF2_4_17	44.1	M	31.5	1219.3	1176.4	897	1160.2	1119.9	857.4
BepaF2_4_18	49.18	F	32.5	1280	1099	853.5	1083.3	911.1	721.7
BepaF2_4_19	42.07	M	7.5	1072.3	985.9	540.1	1068.1	981.9	537.3
BepaF2_4_20	40.34	F	9.5	1022	854.1	561	1064.7	894.9	589.6
BepaF2_4_21	32.48	M	7	805.9	711.7	347	1061.4	955.8	518.2
BepaF2_4_22	42.85	M	30.5	1246.5	1067.6	670.9	1221.2	1043.4	653.9
BepaF2_4_23	46.5	M	33.5	1364.3	1249.7	1002.7	1240.2	1131.1	919.5
BepaF2_4_24	43.35	M	32	1157.1	1034.6	629.6	1118.3	997.5	603.6
BepaF2_4_25	42.36	F	7	945.6	914.8	685	933.6	903.3	676.9
BepaF2_4_26	41.78	M	32.5	1003.2	984.4	709.1	1006.9	987.9	711.6
BepaF2_4_27	43.67	F	31	1082.2	1062.9	615.4	1034.7	1017.5	583.6
BepaF2_4_28	45.24	M	33	1181.1	1026.8	794.4	1091.1	940.8	734.1
BepaF2_4_29	45.36	F	33	1009	990.6	596.1	915.7	901.5	533.6
BepaF2_4_30	43.38	F	33	946.7	1005.8	688.2	907.1	967.9	661.6
BepaF2_4_31	44.25	F	33	1307.3	1269	NA	1244.1	1208.6	NA
BepaF2_4_32	42.52	F	8	982.3	980.7	715.4	965.9	965.1	704.4
BepaF2_4_33	43.77	M	7.5	1060.8	1043	630.6	1010.6	995	597
BepaF2_4_34	40.24	M	7	1044.5	831	584.5	1089.9	874.4	614.9
BepaF2_4_35	43.64	M	7.5	1248.6	1195.8	782.9	1201.9	1151.2	751.6
BepaF2_4_36	45.97	M	7.5	1156	1154.4	731.6	1046.2	1049.5	658
BepaF2_4_37	40.37	F	31	1016.3	881.3	617	1058.2	921.3	645.1
BepaF2_4_38	43.86	M	10	981.2	953	618.6	928.6	902.7	583.3
BepaF2_4_39	44.17	F	9.5	1079.6	1045.6	670.9	1018.6	987.3	630
BepaF2_5_1	46.02	F	9	1215.7	1256.5	758.8	1104.6	1150.3	684.3
BepaF2_5_2	47.54	F	33	1366.9	1171.2	946.2	1214.6	1025.7	844.1
BepaF2_5_3	41.53	M	32.5	1122.5	925.8	762	1132.9	935.8	769
BepaF2_5_4	43.31	M	32.5	1141.4	929.4	611.2	1103.7	893.3	585.9
BepaF2_5_5	45.86	M	33.5	1205.2	1233.5	891.7	1098.4	1131.5	820.1
BepaF2_5_6	42.89	M	32.5	1323.5	1220.4	777.1	1297.1	1195.2	759.4
BepaF2_5_7	45.08	F	33	1329.8	1127.2	983.3	1244.1	1045.3	925.9
BepaF2_5_8	35	F	6	698.6	634.8	460	885.9	813.7	585.5
BepaF2_5_9	43.16	F	10	1089	1030.9	726.4	1055.3	998.7	703.8
BepaF2_5_10	47.17	F	9.5	1207.8	874.5	765.6	1065.5	738.6	670.2
BepaF2_5_11	42.65	F	9	1089	1044.5	458.4	1069.1	1025.5	445.1
BepaF2_5_12	44.84	M	7	1282.7	1123.6	801.7	1203.5	1048	748.6
BepaF2_5_13	45.15	F	10.5	1166.5	1021	590.3	1078.9	937.3	531.6
BepaF2_5_14	42	F	12	1095.8	1032.5	715.4	1093.5	1030.3	713.9
BepaF2_5_15	40.21	F	33	1081.7	951.9	585.1	1127.9	996	616.1
BepaF2_5_16	43.05	M	33.5	1200	1124.6	901.2	1169.3	1095.3	880.6
BepaF2_5_17	44.65	F	30.5	1061.3	973.9	689.7	987.3	903.2	640.1
BepaF2_5_18	33.81	M	31.5	1039.3	920	611.2	1258.8	1129.7	758.3
BepaF2_5_19	42.84	F	32.5	885.5	NA	473.1	860.5	NA	456.3
BepaF2_5_20	42.58	F	10	1100.5	1126.2	818.5	1082.5	1109	806.4
BepaF2_5_21	46.93	M	32.5	1341.3	1230.3	718	1205.5	1100.6	627
BepaF2_5_22	41.78	M	9	1058.2	844.1	668.3	1061.9	847.6	670.8
BepaF2_5_23	38.48	M	8	1063.9	763	651.5	1156.9	851.9	713.9
BepaF2_5_24	39.83	M	33	1251.3	956.1	800.2	1307.8	1010.1	838.1
BepaF2_5_25	39.73	M	7	1291	1162.3	913.7	1350.2	1218.8	953.4
BepaF2_5_26	42.36	M	34.5	1323.5	1133	901.7	1311.5	1121.5	893.6
BepaF2_5_27	31.37	F	35	831.6	734.2	506	1117.2	1007	697.4
BepaF2_5_28	39.76	F	33.5	1171.2	1053.4	646.3	1229.6	1109.2	685.4
BepaF2_5_29	37.45	F	6.5	1192.6	1128.8	913.2	1313.5	1244.3	994.2
BepaF2_6_1	41.94	F	30.5	1018.4	749.9	540.1	1017.7	749.3	539.7
BepaF2_6_2	43.97	M	33	1177.5	1010	577.2	1121.9	956.9	539.9
BepaF2_6_3	39.03	M	6.5	1168	998.5	506.6	1246.1	1073.2	559
BepaF2_6_5	39.66	M	32.5	1056.1	958.2	489.3	1117.2	1016.6	530.2
BepaF2_6_6	41.53	F	32.5	1157.1	993.8	433.3	1167.5	1003.8	440.3
BepaF2_6_7	40.07	F	32.5	999	755.1	489.3	1049	802.9	522.8
BepaF2_6_9	38.88	M	31	1025.7	917.9	616.5	1107.9	996.4	671.6
BepaF2_6_10	40.37	M	8.5	1127.2	923.1	740	1169.1	963.1	768.1
BepaF2_6_11	34.66	M	31.5	868.2	769.3	430.2	1064.7	957	561.9
BepaF2_6_12	41.34	F	27	991.7	1003.2	552.1	1007.3	1018.1	562.6
BepaF2_6_14	39.23	M	7	1015.2	1148.2	599.7	1087.9	1217.7	648.4
BepaF2_6_15	38.62	M	31	983.8	958.2	646.8	1073	1043.5	706.6
BepaF2_6_16	37.87	F	29	1143.5	813.2	584	1253.1	917.9	657.4
BepaF2_6_17	39.22	M	32	1070.2	1058.2	722.7	1143.2	1127.9	771.6
BepaF2_6_18	38.24	F	32.5	1002.7	906.9	590.8	1102.2	1002	657.5
BepaF2_6_19	32.2	F	7.5	752.5	746.8	460.5	1015.6	998.2	636.8
BepaF2_6_21	41.99	F	8.5	1139.3	995.4	575.7	1137.3	993.5	574.4
BepaF2_6_22	37.82	F	33	910.6	649.4	464.7	1021.5	755.4	539
BepaF2_6_23	43.67	F	31.5	921.6	948.3	616.5	874.1	902.9	584.7
BepaF2_6_25	35.71	M	33.5	NA	799.6	411.3	NA	960.1	523.9
BepaF2_6_29	44.98	M	32.5	1237.6	1120.4	831.6	1154.6	1041.1	776
BepaF2_6_31	33.91	M	9.5	847.8	868.7	614.9	1064.6	1075.8	760.2
BepaF2_6_32	32.56	F	32.5	821.6	782.9	531.2	1074.9	1024.9	701
BepaF2_6_33	39.05	M	8.5	1047.2	NA	530.1	1124.8	NA	582.1
BepaF2_6_35	37.17	M	7.5	935.2	915.8	664.1	1063.7	1038.6	750.2
BepaF2_7_1	36.16	F	7	908.5	787.6	528.6	1064.4	936.5	633.1
BepaF2_7_2	38.55	F	32	1012.1	1022	543.7	1103.2	1109.1	604.8
BepaF2_7_6	33.3	M	32.5	999	867.1	518.6	1232.3	1090	675
BepaF2_7_7	35.93	M	33.5	1060.2	852.5	557.9	1222.3	1007.4	666.5
BepaF2_7_8	42.23	M	32.5	1180.1	1126.2	804.9	1171.6	1118.1	799.2
BepaF2_7_9	43.36	F	31	1187.4	1058.2	579.8	1148.3	1020.8	553.6
BepaF2_7_10	41.92	M	32	1332.9	1247.1	710.1	1332.8	1247	710
BepaF2_7_11	41.02	M	9	NA	NA	835.2	NA	NA	851.5
BepaF2_7_12	41.71	F	33.5	1171.2	1237.1	757.2	1176.8	1242.4	760.9
BepaF2_7_13	41.5	F	8.5	1119.9	785	504.5	1131.2	795.8	512
BepaF2_7_14	39.77	M	6	934.1	1041.4	862.4	992.2	1096.9	901.3
BepaF2_7_15	38.38	F	32.5	1004.2	886	584.5	1099.9	977.5	648.7
BepaF2_7_16	32.37	F	32.5	857.7	917.4	596.6	1116.2	1164.4	769.8
BepaF2_7_17	37.55	M	7	980.2	772.9	763	1098.4	885.8	842.2
BepaF2_7_18	37.25	M	33	1145.5	886	569.9	1271.8	1006.7	654.6
BepaF2_7_19	43.09	M	7.5	1221.9	1135.6	942	1190.1	1105.2	920.7
BepaF2_7_20	37.97	M	32	1140.3	1122.5	711.7	1247.1	1224.6	783.3
BepaF2_7_21	41.35	M	11	1063.4	992.2	599.2	1078.7	1006.8	609.5
BepaF2_7_22	41.16	M	7.5	1166.5	1043	658.9	1187	1062.6	672.6
BepaF2_7_23	39.67	M	7	1194.7	973.4	727.9	1255.5	1031.5	768.7
BepaF2_7_24	41.59	F	31	1115.7	1105.2	766.7	1124.5	1113.6	772.6
BepaF2_7_25	42.56	F	7	1203.6	1074.9	812.2	1186.2	1058.2	800.5
BepaF2_7_26	43.11	M	33	1305.2	939.9	682.4	1272.9	909	660.7
BepaF2_7_27	43.59	M	7	1333.4	1123	761.4	1288.1	1079.7	731
BepaF2_7_28	38.25	F	33	934.1	805.4	449	1033.4	900.2	515.5
BepaF2_7_29	36.44	F	28.5	978.6	878.1	448	1126.9	1019.8	547.4
BepaF2_7_30	34.64	F	32.5	876.6	725.8	360.6	1073.6	914	492.6
BepaF2_7_31	29.62	M	32	967.1	673	475.7	1300	991.1	698.8
BepaF2_7_32	39.07	F	8.5	1018.9	914.2	656.8	1096	987.8	708.4
BepaF2_8_1	50.61	M	8.5	1149.7	1245	879.7	914.3	1020.1	721.9
BepaF2_8_2	54.9	F	11	1404.1	1233.5	655.2	1052.5	897.6	419.6
BepaF2_8_3	60.2	M	12	1838.9	1701.3	960.8	1343.8	1228.3	629
BepaF2_8_4	51.84	F	33.5	1212.5	1161.8	882.8	943.8	905.1	702.7
BepaF2_8_5	54.22	M	34	1531.8	1391.5	1124.6	1198.6	1073.2	901.3
BepaF2_8_6	54.8	M	34.5	1441.7	1363.8	722.2	1092.8	1030.5	488.4
BepaF2_8_7	61.86	F	34	1690.8	1329.2	1156.5	1150.8	813.2	794.6
BepaF2_8_8	56.84	F	32.5	1755.2	1608.2	989.1	1351.1	1222.1	718.3
BepaF2_8_9	49.93	M	34	1236.1	1303.6	658.9	1019.1	1096.3	513.5
BepaF2_8_10	57.51	F	31.5	1255.4	1090.1	794.9	833.2	686.7	511.9
BepaF2_8_11	53.13	F	11.5	1401.4	1298.4	626.9	1097.8	1008.3	423.4
BepaF2_8_12	56.71	F	9.5	1560.5	1406.2	1157.1	1159.9	1023.5	888.6
BepaF2_8_13	52.37	F	10	1233.5	1293.6	690.3	950.4	1023.1	500.6
BepaF2_8_14	62.78	F	33	1431.3	1232.4	895.9	866.4	692.6	517.3
BepaF2_8_15	55.51	M	33	1892.3	1640.6	1097.4	1524.2	1288.9	850.7
BepaF2_8_16	52.05	M	32	1406.2	1137.7	638.4	1131.8	875.5	454.5
BepaF2_8_17	58.59	F	33	NA	1292.6	556.8	NA	861.2	254.2
BepaF2_8_18	54.48	F	33	1537.5	1661	1011.6	1197.3	1336	783.6
BepaF2_8_19	58.99	F	33	NA	NA	NA	NA	NA	NA
BepaF2_8_20	51.45	F	33	NA	NA	NA	NA	NA	NA
BepaF2_8_21	46.24	F	21	NA	NA	NA	NA	NA	NA
BepaF2_8_22	63.36	F	32.5	NA	NA	NA	NA	NA	NA
BepaF2_8_23	60.73	F	36	NA	NA	NA	NA	NA	NA
BepaF2_8_24	52.59	M	35	NA	NA	NA	NA	NA	NA
BepaF2_8_25	56.3	F	34	NA	NA	NA	NA	NA	NA
BepaF2_8_26	49.65	M	33	NA	NA	NA	NA	NA	NA
BepaF2_8_27	52.95	F	9.5	NA	NA	NA	NA	NA	NA
BepaF2_8_28	52.12	M	35.5	NA	NA	NA	NA	NA	NA
BepaF2_8_29	58.89	M	33	NA	NA	NA	NA	NA	NA
BepaF2_8_30	58.29	F	31.5	NA	NA	NA	NA	NA	NA
BepaF2_8_31	52.45	M	33.5	NA	NA	NA	NA	NA	NA
BepaF2_8_32	52.84	M	8	NA	NA	NA	NA	NA	NA
BepaF2_8_33	53.12	M	34.5	NA	NA	NA	NA	NA	NA
BepaF2_8_34	50.93	M	9.5	NA	NA	NA	NA	NA	NA
BepaF2_8_35	63.89	F	33.5	NA	NA	NA	NA	NA	NA
BepaF2_8_37	55.82	F	34	NA	NA	NA	NA	NA	NA
BepaF2_8_38	52.72	M	35	NA	NA	NA	NA	NA	NA
BepaF2_8_39	50	F	33.5	NA	NA	NA	NA	NA	NA
BepaF2_8_40	55.82	F	29	NA	NA	NA	NA	NA	NA
BepaF2_8_41	54.2	M	33	NA	NA	NA	NA	NA	NA
BepaF2_8_42	51.9	M	33	NA	NA	NA	NA	NA	NA
BepaF2_8_43	52.11	M	34	NA	NA	NA	NA	NA	NA
BepaF2_9_1	49.76	M	10.5	NA	NA	NA	NA	NA	NA
BepaF2_9_2	54.79	F	8	NA	NA	NA	NA	NA	NA
BepaF2_9_3	53.36	F	34	NA	NA	NA	NA	NA	NA
BepaF2_9_4	52.77	M	33	NA	NA	NA	NA	NA	NA
BepaF2_9_5	57.77	F	11	NA	NA	NA	NA	NA	NA
BepaF2_9_6	50.19	M	8.5	NA	NA	NA	NA	NA	NA
BepaF2_9_7	53.27	F	32	NA	NA	NA	NA	NA	NA
BepaF2_9_8	52.45	F	11	NA	NA	NA	NA	NA	NA
BepaF2_9_9	53.01	F	33	NA	NA	NA	NA	NA	NA
BepaF2_9_10	49.85	M	10.5	NA	NA	NA	NA	NA	NA
BepaF2_9_11	53.09	M	33	NA	NA	NA	NA	NA	NA
BepaF2_9_12	56.16	M	33	NA	NA	NA	NA	NA	NA
BepaF2_9_13	50.03	M	32.5	NA	NA	NA	NA	NA	NA
BepaF2_9_14	51.37	M	31	NA	NA	NA	NA	NA	NA
BepaF2_9_15	57.67	F	33.5	NA	NA	NA	NA	NA	NA
BepaF2_9_16	52.35	F	32	NA	NA	NA	NA	NA	NA
BepaF2_9_17	50.42	M	33.5	NA	NA	NA	NA	NA	NA
BepaF2_9_18	49.91	M	36.5	NA	NA	NA	NA	NA	NA
BepaF2_9_19	51.44	F	11.5	NA	NA	NA	NA	NA	NA
BepaF2_9_20	48.54	F	9	NA	NA	NA	NA	NA	NA
BepaF2_9_21	51.74	M	32.5	NA	NA	NA	NA	NA	NA
BepaF2_9_22	52.5	M	7.5	NA	NA	NA	NA	NA	NA
BepaF2_9_23	55.45	M	8.5	NA	NA	NA	NA	NA	NA
BepaF2_9_24	53.07	M	33.5	NA	NA	NA	NA	NA	NA
BepaF2_9_25	58.81	F	34	NA	NA	NA	NA	NA	NA
BepaF2_9_26	52.42	M	33	NA	NA	NA	NA	NA	NA
BepaF2_9_27	51.7	M	13	NA	NA	NA	NA	NA	NA
BepaF2_9_28	47.33	M	7	NA	NA	NA	NA	NA	NA
BepaF2_9_29	52.08	F	33.5	NA	NA	NA	NA	NA	NA
