# Supplementary material for: Genome Assembly Improvement and Mapping Convergently Evolved Skeletal Traits in Sticklebacks with Genotyping-by-Sequencing
Source: G3 (Bethesda). 2015 Jun 3;5(7):1463–72. doi: 10.1534/g3.115.017905 (PMC4502380; doi:10.1534/g3.115.017905)
Supplement: Supporting Information [file supp_g3.115.017905_FileS3.xlsx]

## Sheet: FileS3.csv
marker	scaffold	oldChr	oldStart	oldEnd	binLength	newChr	newStart	newEnd	newOrientation
83_1	83	1	1	270041	270041	1	540082	270042	reverse
83_2	83	1	270042	540082	270041	1	270041	1	reverse
92_1	92	1	541083	794592	253510	1	680441	933950	forward
92_2	92	1	794593	1048102	253510	1	933951	1187460	forward
97_1	97	1	1049103	1296725	247623	1	1188461	1436083	forward
97_2	97	1	1296726	1544349	247624	1	1436084	1683707	forward
30_1	30	1	1545350	2033021	487672	1	2026505	2514176	forward
30_2	30	1	2033022	2520693	487672	1	2514177	3001848	forward
30_3	30	1	2520694	3008365	487672	1	3001849	3489520	forward
30_4	30	1	3008366	3496037	487672	1	3489521	3977192	forward
30_5	30	1	3496038	3983709	487672	1	3977193	4464864	forward
30_6	30	1	3983710	4471381	487672	1	4464865	4952536	forward
30_7	30	1	4471382	4959053	487672	1	4952537	5440208	forward
30_8	30	1	4959054	5446725	487672	1	5440209	5927880	forward
30_9	30	1	5446726	5934397	487672	1	5927881	6415552	forward
7_1	7	1	5935398	6434893	499496	1	6416553	6916048	forward
7_2	7	1	6434894	6934389	499496	1	6916049	7415544	forward
7_3	7	1	6934390	7433885	499496	1	7415545	7915040	forward
7_4	7	1	7433886	7933381	499496	1	7915041	8414536	forward
7_5	7	1	7933382	8432877	499496	1	8414537	8914032	forward
7_6	7	1	8432878	8932373	499496	1	8914033	9413528	forward
7_7	7	1	8932374	9431869	499496	1	9413529	9913024	forward
7_8	7	1	9431870	9931365	499496	1	9913025	10412520	forward
7_9	7	1	9931366	10430861	499496	1	10412521	10912016	forward
7_10	7	1	10430862	10930357	499496	1	10912017	11411512	forward
7_11	7	1	10930358	11429853	499496	1	11411513	11911008	forward
7_12	7	1	11429854	11929349	499496	1	11911009	12410504	forward
7_13	7	1	11929350	12428846	499497	1	12410505	12910001	forward
7_14	7	1	12428847	12928343	499497	1	12910002	13409498	forward
7_15	7	1	12928344	13427840	499497	1	13409499	13908995	forward
7_16	7	1	13427841	13927337	499497	1	13908996	14408492	forward
7_17	7	1	13927338	14426834	499497	1	14408493	14907989	forward
7_18	7	1	14426835	14926331	499497	1	14907990	15407486	forward
7_19	7	1	14926332	15425828	499497	1	15407487	15906983	forward
7_20	7	1	15425829	15925325	499497	1	15906984	16406480	forward
7_21	7	1	15925326	16424822	499497	1	16406481	16905977	forward
7_22	7	1	16424823	16924319	499497	1	16905978	17405474	forward
7_23	7	1	16924320	17423816	499497	1	17405475	17904971	forward
7_24	7	1	17423817	17923313	499497	1	17904972	18404468	forward
7_25	7	1	17923314	18422810	499497	1	18404469	18903965	forward
7_26	7	1	18422811	18922307	499497	1	18903966	19403462	forward
7_27	7	1	18922308	19421804	499497	1	19403463	19902959	forward
7_28	7	1	19421805	19921301	499497	1	19902960	20402456	forward
22_1	22	1	19922302	20413496	491195	1	28062544	27571350	reverse
22_2	22	1	20413497	20904691	491195	1	27571349	27080155	reverse
22_3	22	1	20904692	21395886	491195	1	27080154	26588960	reverse
22_4	22	1	21395887	21887081	491195	1	26588959	26097765	reverse
22_5	22	1	21887082	22378276	491195	1	26097764	25606570	reverse
22_6	22	1	22378277	22869471	491195	1	25606569	25115375	reverse
22_7	22	1	22869472	23360666	491195	1	25115374	24624180	reverse
22_8	22	1	23360667	23851861	491195	1	24624179	24132985	reverse
22_9	22	1	23851862	24343056	491195	1	24132984	23641790	reverse
22_10	22	1	24343057	24834251	491195	1	23641789	23150595	reverse
22_11	22	1	24834252	25325446	491195	1	23150594	22659400	reverse
22_12	22	1	25325447	25816641	491195	1	22659399	22168205	reverse
22_13	22	1	25816642	26307836	491195	1	22168204	21677010	reverse
22_14	22	1	26307837	26799032	491196	1	21677009	21185814	reverse
22_15	22	1	26799033	27290228	491196	1	21185813	20694618	reverse
123_1	123	1	27291229	27438505	147277	1	29347098	29494374	unknown
123_2	123	1	27438506	27585783	147278	1	29494375	29641652	unknown
82_1	82	1	27586784	27886348	299565	1	29346097	29046533	reverse
82_2	82	1	27886349	28185914	299566	1	29046532	28746967	reverse
63_1	63	2	1	482803	482803	2	1378184	895382	reverse
63_2	63	2	482804	965607	482804	2	895381	412578	reverse
0_1	0	2	966608	1464496	497889	2	1379185	1877073	forward
0_2	0	2	1464497	1962385	497889	2	1877074	2374962	forward
0_3	0	2	1962386	2460274	497889	2	2374963	2872851	forward
0_4	0	2	2460275	2958163	497889	2	2872852	3370740	forward
0_5	0	2	2958164	3456052	497889	2	3370741	3868629	forward
0_6	0	2	3456053	3953941	497889	2	3868630	4366518	forward
0_7	0	2	3953942	4451830	497889	2	4366519	4864407	forward
0_8	0	2	4451831	4949719	497889	2	4864408	5362296	forward
0_9	0	2	4949720	5447608	497889	2	5362297	5860185	forward
0_10	0	2	5447609	5945497	497889	2	5860186	6358074	forward
0_11	0	2	5945498	6443386	497889	2	6358075	6855963	forward
0_12	0	2	6443387	6941275	497889	2	6855964	7353852	forward
0_13	0	2	6941276	7439164	497889	2	7353853	7851741	forward
0_14	0	2	7439165	7937053	497889	2	7851742	8349630	forward
0_15	0	2	7937054	8434942	497889	2	8349631	8847519	forward
0_16	0	2	8434943	8932831	497889	2	8847520	9345408	forward
0_17	0	2	8932832	9430720	497889	2	9345409	9843297	forward
0_18	0	2	9430721	9928609	497889	2	9843298	10341186	forward
0_19	0	2	9928610	10426498	497889	2	10341187	10839075	forward
0_20	0	2	10426499	10924387	497889	2	10839076	11336964	forward
0_21	0	2	10924388	11422276	497889	2	11336965	11834853	forward
0_22	0	2	11422277	11920166	497890	2	11834854	12332743	forward
0_23	0	2	11920167	12418056	497890	2	12332744	12830633	forward
0_24	0	2	12418057	12915946	497890	2	12830634	13328523	forward
0_25	0	2	12915947	13413836	497890	2	13328524	13826413	forward
0_26	0	2	13413837	13911726	497890	2	13826414	14324303	forward
0_27	0	2	13911727	14409616	497890	2	14324304	14822193	forward
0_28	0	2	14409617	14907506	497890	2	14822194	15320083	forward
0_29	0	2	14907507	15405396	497890	2	15320084	15817973	forward
0_30	0	2	15405397	15903286	497890	2	15817974	16315863	forward
0_31	0	2	15903287	16401176	497890	2	16315864	16813753	forward
0_32	0	2	16401177	16899066	497890	2	16813754	17311643	forward
0_33	0	2	16899067	17396956	497890	2	17311644	17809533	forward
0_34	0	2	17396957	17894846	497890	2	17809534	18307423	forward
0_35	0	2	17894847	18392736	497890	2	18307424	18805313	forward
0_36	0	2	18392737	18890626	497890	2	18805314	19303203	forward
0_37	0	2	18890627	19388516	497890	2	19303204	19801093	forward
0_38	0	2	19388517	19886406	497890	2	19801094	20298983	forward
0_39	0	2	19886407	20384296	497890	2	20298984	20796873	forward
0_40	0	2	20384297	20882186	497890	2	20796874	21294763	forward
0_41	0	2	20882187	21380076	497890	2	21294764	21792653	forward
0_42	0	2	21380077	21877966	497890	2	21792654	22290543	forward
0_43	0	2	21877967	22375856	497890	2	22290544	22788433	forward
96_1	96	2	22376857	22602520	225664	2	23708229	23482566	reverse
96_2	96	2	22602521	22828185	225665	2	23482565	23256901	reverse
102_1	102	2	22829186	23062418	233233	2	22789434	23022666	forward
102_2	102	2	23062419	23295652	233234	2	23022667	23255900	forward
33_1	33	3	1	466942	466942	3	1	466942	forward
33_2	33	3	466943	933885	466943	3	466943	933885	forward
33_3	33	3	933886	1400828	466943	3	933886	1400828	forward
33_4	33	3	1400829	1867771	466943	3	1400829	1867771	forward
33_5	33	3	1867772	2334714	466943	3	1867772	2334714	forward
33_6	33	3	2334715	2801657	466943	3	2334715	2801657	forward
33_7	33	3	2801658	3268600	466943	3	2801658	3268600	forward
15_1	15	3	3269601	3761755	492155	3	3269601	3761755	forward
15_2	15	3	3761756	4253910	492155	3	3761756	4253910	forward
15_3	15	3	4253911	4746065	492155	3	4253911	4746065	forward
15_4	15	3	4746066	5238220	492155	3	4746066	5238220	forward
15_5	15	3	5238221	5730375	492155	3	5238221	5730375	forward
15_6	15	3	5730376	6222530	492155	3	5730376	6222530	forward
15_7	15	3	6222531	6714686	492156	3	6222531	6714686	forward
15_8	15	3	6714687	7206842	492156	3	6714687	7206842	forward
15_9	15	3	7206843	7698998	492156	3	7206843	7698998	forward
15_10	15	3	7698999	8191154	492156	3	7698999	8191154	forward
15_11	15	3	8191155	8683310	492156	3	8191155	8683310	forward
15_12	15	3	8683311	9175466	492156	3	8683311	9175466	forward
15_13	15	3	9175467	9667622	492156	3	9175467	9667622	forward
15_14	15	3	9667623	10159778	492156	3	9667623	10159778	forward
15_15	15	3	10159779	10651934	492156	3	10159779	10651934	forward
15_16	15	3	10651935	11144090	492156	3	10651935	11144090	forward
15_17	15	3	11144091	11636246	492156	3	11144091	11636246	forward
15_18	15	3	11636247	12128402	492156	3	11636247	12128402	forward
15_19	15	3	12128403	12620558	492156	3	12128403	12620558	forward
15_20	15	3	12620559	13112714	492156	3	12620559	13112714	forward
15_21	15	3	13112715	13604870	492156	3	13112715	13604870	forward
15_22	15	3	13604871	14097026	492156	3	13604871	14097026	forward
78_1	78	3	14098027	14417486	319460	3	14098027	14417486	forward
78_2	78	3	14417487	14736947	319461	3	14417487	14736947	forward
81_1	81	3	14737948	15006379	268432	3	14893218	15161649	forward
81_2	81	3	15006380	15274812	268433	3	15161650	15430082	forward
50_1	50	3	15275813	15656485	380673	3	15574686	15955358	forward
50_2	50	3	15656486	16037158	380673	3	15955359	16336031	forward
50_3	50	3	16037159	16417832	380674	3	16336032	16716705	forward
50_4	50	3	16417833	16798506	380674	3	16716706	17097379	forward
65_1	65	4	1	356292	356292	4	1	356292	forward
65_2	65	4	356293	712584	356292	4	356293	712584	forward
65_3	65	4	712585	1068876	356292	4	712585	1068876	forward
222_1	222	4	1069877	1121605	51729	4	1069877	1121605	unknown
222_2	222	4	1121606	1173334	51729	4	1121606	1173334	unknown
20_1	20	4	1174335	1665662	491328	4	1174335	1665662	forward
20_2	20	4	1665663	2156990	491328	4	1665663	2156990	forward
20_3	20	4	2156991	2648318	491328	4	2156991	2648318	forward
20_4	20	4	2648319	3139646	491328	4	2648319	3139646	forward
20_5	20	4	3139647	3630974	491328	4	3139647	3630974	forward
20_6	20	4	3630975	4122302	491328	4	3630975	4122302	forward
20_7	20	4	4122303	4613630	491328	4	4122303	4613630	forward
20_8	20	4	4613631	5104958	491328	4	4613631	5104958	forward
20_9	20	4	5104959	5596286	491328	4	5104959	5596286	forward
20_10	20	4	5596287	6087614	491328	4	5596287	6087614	forward
20_11	20	4	6087615	6578942	491328	4	6087615	6578942	forward
20_12	20	4	6578943	7070270	491328	4	6578943	7070270	forward
20_13	20	4	7070271	7561598	491328	4	7070271	7561598	forward
20_14	20	4	7561599	8052926	491328	4	7561599	8052926	forward
20_15	20	4	8052927	8544255	491329	4	8052927	8544255	forward
20_16	20	4	8544256	9035584	491329	4	8544256	9035584	forward
17_1	17	4	9036585	9524499	487915	4	9036585	9524499	forward
17_2	17	4	9524500	10012414	487915	4	9524500	10012414	forward
17_3	17	4	10012415	10500329	487915	4	10012415	10500329	forward
17_4	17	4	10500330	10988244	487915	4	10500330	10988244	forward
17_5	17	4	10988245	11476159	487915	4	10988245	11476159	forward
17_6	17	4	11476160	11964074	487915	4	11476160	11964074	forward
17_7	17	4	11964075	12451989	487915	4	11964075	12451989	forward
17_8	17	4	12451990	12939904	487915	4	12451990	12939904	forward
17_9	17	4	12939905	13427819	487915	4	12939905	13427819	forward
17_10	17	4	13427820	13915734	487915	4	13427820	13915734	forward
17_11	17	4	13915735	14403649	487915	4	13915735	14403649	forward
17_12	17	4	14403650	14891564	487915	4	14403650	14891564	forward
17_13	17	4	14891565	15379479	487915	4	14891565	15379479	forward
17_14	17	4	15379480	15867394	487915	4	15379480	15867394	forward
17_15	17	4	15867395	16355309	487915	4	15867395	16355309	forward
17_16	17	4	16355310	16843224	487915	4	16355310	16843224	forward
17_17	17	4	16843225	17331140	487916	4	16843225	17331140	forward
17_18	17	4	17331141	17819056	487916	4	17331141	17819056	forward
28_1	28	4	17820057	18311133	491077	4	28705945	28214869	reverse
28_2	28	4	18311134	18802210	491077	4	28214868	27723792	reverse
28_3	28	4	18802211	19293287	491077	4	27723791	27232715	reverse
28_4	28	4	19293288	19784364	491077	4	27232714	26741638	reverse
28_5	28	4	19784365	20275441	491077	4	26741637	26250561	reverse
28_6	28	4	20275442	20766518	491077	4	26250560	25759484	reverse
28_7	28	4	20766519	21257595	491077	4	25759483	25268407	reverse
28_8	28	4	21257596	21748672	491077	4	25268406	24777330	reverse
28_9	28	4	21748673	22239750	491078	4	24777329	24286252	reverse
28_10	28	4	22239751	22730828	491078	4	24286251	23795174	reverse
24_1	24	4	22731829	23200482	468654	4	23443915	22975262	reverse
24_2	24	4	23200483	23669137	468655	4	22975261	22506607	reverse
24_3	24	4	23669138	24137792	468655	4	22506606	22037952	reverse
24_4	24	4	24137793	24606447	468655	4	22037951	21569297	reverse
24_5	24	4	24606448	25075102	468655	4	21569296	21100642	reverse
24_6	24	4	25075103	25543757	468655	4	21100641	20631987	reverse
24_7	24	4	25543758	26012412	468655	4	20631986	20163332	reverse
24_8	24	4	26012413	26481067	468655	4	20163331	19694677	reverse
24_9	24	4	26481068	26949722	468655	4	19694676	19226022	reverse
24_10	24	4	26949723	27418377	468655	4	19226021	18757367	reverse
24_11	24	4	27418378	27887032	468655	4	18757366	18288712	reverse
24_12	24	4	27887033	28355687	468655	4	18288711	17820057	reverse
42_1	42	4	28356688	28775706	419019	4	28706946	29125964	forward
42_2	42	4	28775707	29194725	419019	4	29125965	29544983	forward
42_3	42	4	29194726	29613744	419019	4	29544984	29964002	forward
42_4	42	4	29613745	30032763	419019	4	29964003	30383021	forward
42_5	42	4	30032764	30451783	419020	4	30383022	30802041	forward
41_1	41	4	30452784	30888816	436033	4	30803042	31239074	forward
41_2	41	4	30888817	31324849	436033	4	31239075	31675107	forward
41_3	41	4	31324850	31760882	436033	4	31675108	32111140	forward
41_4	41	4	31760883	32196915	436033	4	32111141	32547173	forward
41_5	41	4	32196916	32632948	436033	4	32547174	32983206	forward
19_1	19	5	1	492355	492355	5	10831231	10338877	reverse
19_2	19	5	492356	984710	492355	5	10338876	9846522	reverse
19_3	19	5	984711	1477065	492355	5	9846521	9354167	reverse
19_4	19	5	1477066	1969420	492355	5	9354166	8861812	reverse
19_5	19	5	1969421	2461775	492355	5	8861811	8369457	reverse
19_6	19	5	2461776	2954130	492355	5	8369456	7877102	reverse
19_7	19	5	2954131	3446485	492355	5	7877101	7384747	reverse
19_8	19	5	3446486	3938841	492356	5	7384746	6892391	reverse
19_9	19	5	3938842	4431197	492356	5	6892390	6400035	reverse
19_10	19	5	4431198	4923553	492356	5	6400034	5907679	reverse
19_11	19	5	4923554	5415909	492356	5	5907678	5415323	reverse
19_12	19	5	5415910	5908265	492356	5	5415322	4922967	reverse
19_13	19	5	5908266	6400621	492356	5	4922966	4430611	reverse
19_14	19	5	6400622	6892977	492356	5	4430610	3938255	reverse
19_15	19	5	6892978	7385333	492356	5	3938254	3445899	reverse
19_16	19	5	7385334	7877689	492356	5	3445898	2953543	reverse
38_1	38	5	7878690	8321596	442907	5	10832232	11275138	forward
38_2	38	5	8321597	8764503	442907	5	11275139	11718045	forward
38_3	38	5	8764504	9207410	442907	5	11718046	12160952	forward
38_4	38	5	9207411	9650317	442907	5	12160953	12603859	forward
38_5	38	5	9650318	10093224	442907	5	12603860	13046766	forward
38_6	38	5	10093225	10536132	442908	5	13046767	13489674	forward
93_1	93	5	10537133	10767244	230112	5	13950899	13720788	reverse
93_2	93	5	10767245	10997357	230113	5	13720787	13490675	reverse
73_1	73	5	10998358	11370047	371690	5	14695279	14323590	reverse
73_2	73	5	11370048	11741737	371690	5	14323589	13951900	reverse
142_1	142	5	11742738	11847896	105159	5	15054935	15160093	forward
142_2	142	5	11847897	11953055	105159	5	15160094	15265252	forward
125_1	125	5	11954056	12102726	148671	5	15563594	15414924	reverse
125_2	125	5	12102727	12251397	148671	5	15414923	15266253	reverse
66_1	66	6	1	442377	442377	6	1887666	1445290	reverse
66_2	66	6	442378	884755	442378	6	1445289	1002912	reverse
35_1	35	6	885756	1338758	453003	6	5656865	5203863	reverse
35_2	35	6	1338759	1791761	453003	6	5203862	4750860	reverse
35_3	35	6	1791762	2244764	453003	6	4750859	4297857	reverse
35_4	35	6	2244765	2697767	453003	6	4297856	3844854	reverse
35_5	35	6	2697768	3150771	453004	6	3844853	3391850	reverse
35_6	35	6	3150772	3603775	453004	6	3391849	2938846	reverse
35_7	35	6	3603776	4056779	453004	6	2938845	2485842	reverse
13_1	13	6	4057780	4552169	494390	6	5657866	6152255	forward
13_2	13	6	4552170	5046559	494390	6	6152256	6646645	forward
13_3	13	6	5046560	5540949	494390	6	6646646	7141035	forward
13_4	13	6	5540950	6035339	494390	6	7141036	7635425	forward
13_5	13	6	6035340	6529729	494390	6	7635426	8129815	forward
13_6	13	6	6529730	7024119	494390	6	8129816	8624205	forward
13_7	13	6	7024120	7518509	494390	6	8624206	9118595	forward
13_8	13	6	7518510	8012899	494390	6	9118596	9612985	forward
13_9	13	6	8012900	8507289	494390	6	9612986	10107375	forward
13_10	13	6	8507290	9001679	494390	6	10107376	10601765	forward
13_11	13	6	9001680	9496069	494390	6	10601766	11096155	forward
13_12	13	6	9496070	9990459	494390	6	11096156	11590545	forward
13_13	13	6	9990460	10484849	494390	6	11590546	12084935	forward
13_14	13	6	10484850	10979239	494390	6	12084936	12579325	forward
13_15	13	6	10979240	11473629	494390	6	12579326	13073715	forward
13_16	13	6	11473630	11968019	494390	6	13073716	13568105	forward
13_17	13	6	11968020	12462409	494390	6	13568106	14062495	forward
13_18	13	6	12462410	12956799	494390	6	14062496	14556885	forward
13_19	13	6	12956800	13451189	494390	6	14556886	15051275	forward
13_20	13	6	13451190	13945579	494390	6	15051276	15545665	forward
13_21	13	6	13945580	14439970	494391	6	15545666	16040056	forward
13_22	13	6	14439971	14934361	494391	6	16040057	16534447	forward
13_23	13	6	14934362	15428752	494391	6	16534448	17028838	forward
13_24	13	6	15428753	15923143	494391	6	17028839	17523229	forward
13_25	13	6	15923144	16417534	494391	6	17523230	18017620	forward
140_1	140	6	16418535	16539092	120558	6	18018621	18139178	unknown
140_2	140	6	16539093	16659650	120558	6	18139179	18259736	unknown
117_1	117	6	16660651	16872162	211512	6	18260737	18472248	forward
117_2	117	6	16872163	17083675	211513	6	18472249	18683761	forward
86_1	86	7	1	269862	269862	7	1068710	798849	reverse
86_2	86	7	269863	539725	269863	7	798848	528986	reverse
118_1	118	7	540726	733991	193266	7	1069711	1262976	forward
118_2	118	7	733992	927258	193267	7	1262977	1456243	forward
55_1	55	7	928259	1351804	423546	7	1457244	1880789	forward
55_2	55	7	1351805	1775351	423547	7	1880790	2304336	forward
55_3	55	7	1775352	2198898	423547	7	2304337	2727883	forward
39_1	39	7	2199899	2681550	481652	7	2728884	3210535	forward
39_2	39	7	2681551	3163202	481652	7	3210536	3692187	forward
39_3	39	7	3163203	3644854	481652	7	3692188	4173839	forward
39_4	39	7	3644855	4126506	481652	7	4173840	4655491	forward
39_5	39	7	4126507	4608158	481652	7	4655492	5137143	forward
23_1	23	7	4609159	5092638	483480	7	5138144	5621623	forward
23_2	23	7	5092639	5576119	483481	7	5621624	6105104	forward
23_3	23	7	5576120	6059600	483481	7	6105105	6588585	forward
23_4	23	7	6059601	6543081	483481	7	6588586	7072066	forward
23_5	23	7	6543082	7026562	483481	7	7072067	7555547	forward
23_6	23	7	7026563	7510043	483481	7	7555548	8039028	forward
23_7	23	7	7510044	7993524	483481	7	8039029	8522509	forward
23_8	23	7	7993525	8477005	483481	7	8522510	9005990	forward
23_9	23	7	8477006	8960486	483481	7	9005991	9489471	forward
23_10	23	7	8960487	9443967	483481	7	9489472	9972952	forward
23_11	23	7	9443968	9927448	483481	7	9972953	10456433	forward
23_12	23	7	9927449	10410929	483481	7	10456434	10939914	forward
1_1	1	7	10411930	10903403	491474	7	13064463	13555936	forward
1_2	1	7	10903404	11394877	491474	7	13555937	14047410	forward
1_3	1	7	11394878	11886351	491474	7	14047411	14538884	forward
1_4	1	7	11886352	12377825	491474	7	14538885	15030358	forward
1_5	1	7	12377826	12869299	491474	7	15030359	15521832	forward
1_6	1	7	12869300	13360773	491474	7	15521833	16013306	forward
1_7	1	7	13360774	13852247	491474	7	16013307	16504780	forward
1_8	1	7	13852248	14343721	491474	7	16504781	16996254	forward
1_9	1	7	14343722	14835196	491475	7	16996255	17487729	forward
1_10	1	7	14835197	15326671	491475	7	17487730	17979204	forward
1_11	1	7	15326672	15818146	491475	7	17979205	18470679	forward
1_12	1	7	15818147	16309621	491475	7	18470680	18962154	forward
1_13	1	7	16309622	16801096	491475	7	18962155	19453629	forward
1_14	1	7	16801097	17292571	491475	7	19453630	19945104	forward
1_15	1	7	17292572	17784046	491475	7	19945105	20436579	forward
1_16	1	7	17784047	18275521	491475	7	20436580	20928054	forward
1_17	1	7	18275522	18766996	491475	7	20928055	21419529	forward
1_18	1	7	18766997	19258471	491475	7	21419530	21911004	forward
1_19	1	7	19258472	19749946	491475	7	21911005	22402479	forward
1_20	1	7	19749947	20241421	491475	7	22402480	22893954	forward
1_21	1	7	20241422	20732896	491475	7	22893955	23385429	forward
1_22	1	7	20732897	21224371	491475	7	23385430	23876904	forward
1_23	1	7	21224372	21715846	491475	7	23876905	24368379	forward
1_24	1	7	21715847	22207321	491475	7	24368380	24859854	forward
1_25	1	7	22207322	22698796	491475	7	24859855	25351329	forward
1_26	1	7	22698797	23190271	491475	7	25351330	25842804	forward
1_27	1	7	23190272	23681746	491475	7	25842805	26334279	forward
1_28	1	7	23681747	24173221	491475	7	26334280	26825754	forward
1_29	1	7	24173222	24664696	491475	7	26825755	27317229	forward
1_30	1	7	24664697	25156171	491475	7	27317230	27808704	forward
1_31	1	7	25156172	25647646	491475	7	27808705	28300179	forward
1_32	1	7	25647647	26139121	491475	7	28300180	28791654	forward
1_33	1	7	26139122	26630596	491475	7	28791655	29283129	forward
1_34	1	7	26630597	27122071	491475	7	29283130	29774604	forward
1_35	1	7	27122072	27613546	491475	7	29774605	30266079	forward
113_1	113	7	27614547	27775994	161448	7	30527501	30688948	forward
113_2	113	7	27775995	27937443	161449	7	30688949	30850397	forward
53_1	53	8	1	456852	456852	8	1169922	1626773	forward
53_2	53	8	456853	913704	456852	8	1626774	2083625	forward
53_3	53	8	913705	1370556	456852	8	2083626	2540477	forward
36_1	36	8	1371557	1818596	447040	8	2541478	2988517	forward
36_2	36	8	1818597	2265636	447040	8	2988518	3435557	forward
36_3	36	8	2265637	2712676	447040	8	3435558	3882597	forward
36_4	36	8	2712677	3159717	447041	8	3882598	4329638	forward
36_5	36	8	3159718	3606758	447041	8	4329639	4776679	forward
36_6	36	8	3606759	4053799	447041	8	4776680	5223720	forward
36_7	36	8	4053800	4500840	447041	8	5223721	5670761	forward
9_1	9	8	4501841	4988251	486411	8	5671762	6158172	forward
9_2	9	8	4988252	5474662	486411	8	6158173	6644583	forward
9_3	9	8	5474663	5961073	486411	8	6644584	7130994	forward
9_4	9	8	5961074	6447484	486411	8	7130995	7617405	forward
9_5	9	8	6447485	6933895	486411	8	7617406	8103816	forward
9_6	9	8	6933896	7420306	486411	8	8103817	8590227	forward
9_7	9	8	7420307	7906717	486411	8	8590228	9076638	forward
9_8	9	8	7906718	8393128	486411	8	9076639	9563049	forward
9_9	9	8	8393129	8879539	486411	8	9563050	10049460	forward
9_10	9	8	8879540	9365950	486411	8	10049461	10535871	forward
9_11	9	8	9365951	9852361	486411	8	10535872	11022282	forward
9_12	9	8	9852362	10338772	486411	8	11022283	11508693	forward
9_13	9	8	10338773	10825183	486411	8	11508694	11995104	forward
9_14	9	8	10825184	11311594	486411	8	11995105	12481515	forward
9_15	9	8	11311595	11798005	486411	8	12481516	12967926	forward
9_16	9	8	11798006	12284416	486411	8	12967927	13454337	forward
9_17	9	8	12284417	12770827	486411	8	13454338	13940748	forward
9_18	9	8	12770828	13257238	486411	8	13940749	14427159	forward
9_19	9	8	13257239	13743649	486411	8	14427160	14913570	forward
9_20	9	8	13743650	14230060	486411	8	14913571	15399981	forward
9_21	9	8	14230061	14716471	486411	8	15399982	15886392	forward
9_22	9	8	14716472	15202882	486411	8	15886393	16372803	forward
9_23	9	8	15202883	15689293	486411	8	16372804	16859214	forward
9_24	9	8	15689294	16175704	486411	8	16859215	17345625	forward
9_25	9	8	16175705	16662115	486411	8	17345626	17832036	forward
9_26	9	8	16662116	17148526	486411	8	17832037	18318447	forward
9_27	9	8	17148527	17634937	486411	8	18318448	18804858	forward
9_28	9	8	17634938	18121348	486411	8	18804859	19291269	forward
71_1	71	8	18122349	18533928	411580	8	19292270	19703849	forward
71_2	71	8	18533929	18945509	411581	8	19703850	20115430	forward
153_1	153	8	18946510	19039493	92984	8	20538625	20445642	reverse
153_2	153	8	19039494	19132477	92984	8	20445641	20352658	reverse
138_1	138	8	19133478	19251090	117613	8	20351657	20234045	reverse
138_2	138	8	19251091	19368704	117614	8	20234044	20116431	reverse
31_1	31	9	1	478688	478688	9	1	478688	forward
31_2	31	9	478689	957376	478688	9	478689	957376	forward
31_3	31	9	957377	1436065	478689	9	957377	1436065	forward
31_4	31	9	1436066	1914754	478689	9	1436066	1914754	forward
31_5	31	9	1914755	2393443	478689	9	1914755	2393443	forward
31_6	31	9	2393444	2872132	478689	9	2393444	2872132	forward
31_7	31	9	2872133	3350821	478689	9	2872133	3350821	forward
31_8	31	9	3350822	3829510	478689	9	3350822	3829510	forward
31_9	31	9	3829511	4308199	478689	9	3829511	4308199	forward
8_1	8	9	4309200	4794377	485178	9	17894190	17409013	reverse
8_2	8	9	4794378	5279555	485178	9	17409012	16923835	reverse
8_3	8	9	5279556	5764733	485178	9	16923834	16438657	reverse
8_4	8	9	5764734	6249911	485178	9	16438656	15953479	reverse
8_5	8	9	6249912	6735089	485178	9	15953478	15468301	reverse
8_6	8	9	6735090	7220267	485178	9	15468300	14983123	reverse
8_7	8	9	7220268	7705445	485178	9	14983122	14497945	reverse
8_8	8	9	7705446	8190623	485178	9	14497944	14012767	reverse
8_9	8	9	8190624	8675801	485178	9	14012766	13527589	reverse
8_10	8	9	8675802	9160979	485178	9	13527588	13042411	reverse
8_11	8	9	9160980	9646157	485178	9	13042410	12557233	reverse
8_12	8	9	9646158	10131335	485178	9	12557232	12072055	reverse
8_13	8	9	10131336	10616513	485178	9	12072054	11586877	reverse
8_14	8	9	10616514	11101691	485178	9	11586876	11101699	reverse
8_15	8	9	11101692	11586869	485178	9	11101698	10616521	reverse
8_16	8	9	11586870	12072047	485178	9	10616520	10131343	reverse
8_17	8	9	12072048	12557225	485178	9	10131342	9646165	reverse
8_18	8	9	12557226	13042403	485178	9	9646164	9160987	reverse
8_19	8	9	13042404	13527581	485178	9	9160986	8675809	reverse
8_20	8	9	13527582	14012759	485178	9	8675808	8190631	reverse
8_21	8	9	14012760	14497937	485178	9	8190630	7705453	reverse
8_22	8	9	14497938	14983116	485179	9	7705452	7220274	reverse
8_23	8	9	14983117	15468295	485179	9	7220273	6735095	reverse
8_24	8	9	15468296	15953474	485179	9	6735094	6249916	reverse
8_25	8	9	15953475	16438653	485179	9	6249915	5764737	reverse
8_26	8	9	16438654	16923832	485179	9	5764736	5279558	reverse
8_27	8	9	16923833	17409011	485179	9	5279557	4794379	reverse
8_28	8	9	17409012	17894190	485179	9	4794378	4309200	reverse
77_1	77	9	17895191	18197494	302304	9	17895191	18197494	forward
77_2	77	9	18197495	18499799	302305	9	18197495	18499799	forward
91_1	91	9	18500800	18766023	265224	9	19031248	18766025	reverse
91_2	91	9	18766024	19031248	265225	9	18766024	18500800	reverse
105_1	105	9	19032249	19258665	226417	9	19032249	19258665	forward
105_2	105	9	19258666	19485083	226418	9	19258666	19485083	forward
183_1	183	9	19486084	19546688	60605	9	19607294	19546690	reverse
183_2	183	9	19546689	19607294	60606	9	19546689	19486084	reverse
447_1	447	9	19608295	19626165	17871	Un	15036168	15054038	unknown
189_1	189	9	19627166	19685624	58459	9	19718002	19776460	forward
189_2	189	9	19685625	19744083	58459	9	19776461	19834919	forward
87_1	87	9	19745084	19997281	252198	9	20593793	20341596	reverse
87_2	87	9	19997282	20249479	252198	9	20341595	20089398	reverse
5_1	5	10	1	484706	484706	10	2079148	2563853	forward
5_2	5	10	484707	969413	484707	10	2563854	3048560	forward
5_3	5	10	969414	1454120	484707	10	3048561	3533267	forward
5_4	5	10	1454121	1938827	484707	10	3533268	4017974	forward
5_5	5	10	1938828	2423534	484707	10	4017975	4502681	forward
5_6	5	10	2423535	2908241	484707	10	4502682	4987388	forward
5_7	5	10	2908242	3392948	484707	10	4987389	5472095	forward
5_8	5	10	3392949	3877655	484707	10	5472096	5956802	forward
5_9	5	10	3877656	4362362	484707	10	5956803	6441509	forward
5_10	5	10	4362363	4847069	484707	10	6441510	6926216	forward
5_11	5	10	4847070	5331776	484707	10	6926217	7410923	forward
5_12	5	10	5331777	5816483	484707	10	7410924	7895630	forward
5_13	5	10	5816484	6301190	484707	10	7895631	8380337	forward
5_14	5	10	6301191	6785897	484707	10	8380338	8865044	forward
5_15	5	10	6785898	7270604	484707	10	8865045	9349751	forward
5_16	5	10	7270605	7755311	484707	10	9349752	9834458	forward
5_17	5	10	7755312	8240018	484707	10	9834459	10319165	forward
5_18	5	10	8240019	8724725	484707	10	10319166	10803872	forward
5_19	5	10	8724726	9209432	484707	10	10803873	11288579	forward
5_20	5	10	9209433	9694139	484707	10	11288580	11773286	forward
5_21	5	10	9694140	10178846	484707	10	11773287	12257993	forward
5_22	5	10	10178847	10663553	484707	10	12257994	12742700	forward
5_23	5	10	10663554	11148260	484707	10	12742701	13227407	forward
5_24	5	10	11148261	11632967	484707	10	13227408	13712114	forward
5_25	5	10	11632968	12117674	484707	10	13712115	14196821	forward
5_26	5	10	12117675	12602381	484707	10	14196822	14681528	forward
5_27	5	10	12602382	13087088	484707	10	14681529	15166235	forward
5_28	5	10	13087089	13571795	484707	10	15166236	15650942	forward
5_29	5	10	13571796	14056502	484707	10	15650943	16135649	forward
5_30	5	10	14056503	14541209	484707	10	16135650	16620356	forward
59_1	59	10	14542210	14913952	371743	10	16920057	17291799	forward
59_2	59	10	14913953	15285696	371744	10	17291800	17663543	forward
59_3	59	10	15285697	15657440	371744	10	17663544	18035287	forward
75_1	75	11	1	310076	310076	11	748151	1058226	forward
75_2	75	11	310077	620152	310076	11	1058227	1368302	forward
49_1	49	11	621153	1016998	395846	11	2952689	2556844	reverse
49_2	49	11	1016999	1412845	395847	11	2556843	2160997	reverse
49_3	49	11	1412846	1808692	395847	11	2160996	1765150	reverse
49_4	49	11	1808693	2204539	395847	11	1765149	1369303	reverse
11_1	11	11	2205540	2703476	497937	11	2953690	3451626	forward
11_2	11	11	2703477	3201413	497937	11	3451627	3949563	forward
11_3	11	11	3201414	3699350	497937	11	3949564	4447500	forward
11_4	11	11	3699351	4197287	497937	11	4447501	4945437	forward
11_5	11	11	4197288	4695224	497937	11	4945438	5443374	forward
11_6	11	11	4695225	5193161	497937	11	5443375	5941311	forward
11_7	11	11	5193162	5691098	497937	11	5941312	6439248	forward
11_8	11	11	5691099	6189035	497937	11	6439249	6937185	forward
11_9	11	11	6189036	6686972	497937	11	6937186	7435122	forward
11_10	11	11	6686973	7184909	497937	11	7435123	7933059	forward
11_11	11	11	7184910	7682846	497937	11	7933060	8430996	forward
11_12	11	11	7682847	8180783	497937	11	8430997	8928933	forward
11_13	11	11	8180784	8678720	497937	11	8928934	9426870	forward
11_14	11	11	8678721	9176657	497937	11	9426871	9924807	forward
11_15	11	11	9176658	9674595	497938	11	9924808	10422745	forward
11_16	11	11	9674596	10172533	497938	11	10422746	10920683	forward
11_17	11	11	10172534	10670471	497938	11	10920684	11418621	forward
11_18	11	11	10670472	11168409	497938	11	11418622	11916559	forward
11_19	11	11	11168410	11666347	497938	11	11916560	12414497	forward
11_20	11	11	11666348	12164285	497938	11	12414498	12912435	forward
11_21	11	11	12164286	12662223	497938	11	12912436	13410373	forward
11_22	11	11	12662224	13160161	497938	11	13410374	13908311	forward
11_23	11	11	13160162	13658099	497938	11	13908312	14406249	forward
11_24	11	11	13658100	14156037	497938	11	14406250	14904187	forward
11_25	11	11	14156038	14653975	497938	11	14904188	15402125	forward
11_26	11	11	14653976	15151913	497938	11	15402126	15900063	forward
79_1	79	11	15152914	15444793	291880	11	16677201	16385322	reverse
79_2	79	11	15444794	15736674	291881	11	16385321	16093441	reverse
103_1	103	11	15737675	15934847	197173	11	17072548	16875376	reverse
103_2	103	11	15934848	16132021	197174	11	16875375	16678202	reverse
100_1	100	11	16133022	16347660	214639	11	17502827	17288189	reverse
100_2	100	11	16347661	16562300	214640	11	17288188	17073549	reverse
190_1	190	11	16563301	16634676	71376	11	17503828	17575203	unknown
190_2	190	11	16634677	16706052	71376	11	17575204	17646579	unknown
158_1	158	12	1	90198	90198	12	881327	971524	forward
158_2	158	12	90199	180396	90198	12	971525	1061722	forward
62_1	62	12	181397	536391	354995	12	1062723	1417717	forward
62_2	62	12	536392	891386	354995	12	1417718	1772712	forward
62_3	62	12	891387	1246382	354996	12	1772713	2127708	forward
64_1	64	12	1247383	1727896	480514	12	3420529	3901042	forward
64_2	64	12	1727897	2208411	480515	12	3901043	4381557	forward
6_1	6	12	2209412	2703831	494420	12	18720760	18226341	reverse
6_2	6	12	2703832	3198251	494420	12	18226340	17731921	reverse
6_3	6	12	3198252	3692671	494420	12	17731920	17237501	reverse
6_4	6	12	3692672	4187091	494420	12	17237500	16743081	reverse
6_5	6	12	4187092	4681511	494420	12	16743080	16248661	reverse
6_6	6	12	4681512	5175931	494420	12	16248660	15754241	reverse
6_7	6	12	5175932	5670352	494421	12	15754240	15259820	reverse
6_8	6	12	5670353	6164773	494421	12	15259819	14765399	reverse
6_9	6	12	6164774	6659194	494421	12	14765398	14270978	reverse
6_10	6	12	6659195	7153615	494421	12	14270977	13776557	reverse
6_11	6	12	7153616	7648036	494421	12	13776556	13282136	reverse
6_12	6	12	7648037	8142457	494421	12	13282135	12787715	reverse
6_13	6	12	8142458	8636878	494421	12	12787714	12293294	reverse
6_14	6	12	8636879	9131299	494421	12	12293293	11798873	reverse
6_15	6	12	9131300	9625720	494421	12	11798872	11304452	reverse
6_16	6	12	9625721	10120141	494421	12	11304451	10810031	reverse
6_17	6	12	10120142	10614562	494421	12	10810030	10315610	reverse
6_18	6	12	10614563	11108983	494421	12	10315609	9821189	reverse
6_19	6	12	11108984	11603404	494421	12	9821188	9326768	reverse
6_20	6	12	11603405	12097825	494421	12	9326767	8832347	reverse
6_21	6	12	12097826	12592246	494421	12	8832346	8337926	reverse
6_22	6	12	12592247	13086667	494421	12	8337925	7843505	reverse
6_23	6	12	13086668	13581088	494421	12	7843504	7349084	reverse
6_24	6	12	13581089	14075509	494421	12	7349083	6854663	reverse
6_25	6	12	14075510	14569930	494421	12	6854662	6360242	reverse
6_26	6	12	14569931	15064351	494421	12	6360241	5865821	reverse
6_27	6	12	15064352	15558772	494421	12	5865820	5371400	reverse
6_28	6	12	15558773	16053193	494421	12	5371399	4876979	reverse
6_29	6	12	16053194	16547614	494421	12	4876978	4382558	reverse
70_1	70	12	16548615	16919066	370452	12	19462664	19092213	reverse
70_2	70	12	16919067	17289518	370452	12	19092212	18721761	reverse
60_1	60	12	17290519	17660701	370183	12	20574213	20204031	reverse
60_2	60	12	17660702	18030884	370183	12	20204030	19833848	reverse
60_3	60	12	18030885	18401067	370183	12	19833847	19463665	reverse
51_1	51	13	1	491421	491421	13	1474264	982844	reverse
51_2	51	13	491422	982842	491421	13	982843	491423	reverse
51_3	51	13	982843	1474264	491422	13	491422	1	reverse
52_1	52	13	1475265	1924895	449631	13	1475265	1924895	forward
52_2	52	13	1924896	2374526	449631	13	1924896	2374526	forward
52_3	52	13	2374527	2824157	449631	13	2374527	2824157	forward
4_1	4	13	2825158	3314407	489250	13	2825158	3314407	forward
4_2	4	13	3314408	3803657	489250	13	3314408	3803657	forward
4_3	4	13	3803658	4292907	489250	13	3803658	4292907	forward
4_4	4	13	4292908	4782157	489250	13	4292908	4782157	forward
4_5	4	13	4782158	5271407	489250	13	4782158	5271407	forward
4_6	4	13	5271408	5760657	489250	13	5271408	5760657	forward
4_7	4	13	5760658	6249907	489250	13	5760658	6249907	forward
4_8	4	13	6249908	6739157	489250	13	6249908	6739157	forward
4_9	4	13	6739158	7228407	489250	13	6739158	7228407	forward
4_10	4	13	7228408	7717657	489250	13	7228408	7717657	forward
4_11	4	13	7717658	8206907	489250	13	7717658	8206907	forward
4_12	4	13	8206908	8696157	489250	13	8206908	8696157	forward
4_13	4	13	8696158	9185407	489250	13	8696158	9185407	forward
4_14	4	13	9185408	9674657	489250	13	9185408	9674657	forward
4_15	4	13	9674658	10163907	489250	13	9674658	10163907	forward
4_16	4	13	10163908	10653157	489250	13	10163908	10653157	forward
4_17	4	13	10653158	11142407	489250	13	10653158	11142407	forward
4_18	4	13	11142408	11631657	489250	13	11142408	11631657	forward
4_19	4	13	11631658	12120908	489251	13	11631658	12120908	forward
4_20	4	13	12120909	12610159	489251	13	12120909	12610159	forward
4_21	4	13	12610160	13099410	489251	13	12610160	13099410	forward
4_22	4	13	13099411	13588661	489251	13	13099411	13588661	forward
4_23	4	13	13588662	14077912	489251	13	13588662	14077912	forward
4_24	4	13	14077913	14567163	489251	13	14077913	14567163	forward
4_25	4	13	14567164	15056414	489251	13	14567164	15056414	forward
4_26	4	13	15056415	15545665	489251	13	15056415	15545665	forward
4_27	4	13	15545666	16034916	489251	13	15545666	16034916	forward
4_28	4	13	16034917	16524167	489251	13	16034917	16524167	forward
4_29	4	13	16524168	17013418	489251	13	16524168	17013418	forward
4_30	4	13	17013419	17502669	489251	13	17013419	17502669	forward
4_31	4	13	17502670	17991920	489251	13	17502670	17991920	forward
4_32	4	13	17991921	18481171	489251	13	17991921	18481171	forward
57_1	57	13	18482172	18871644	389473	13	19650590	19261118	reverse
57_2	57	13	18871645	19261117	389473	13	19261117	18871645	reverse
57_3	57	13	19261118	19650590	389473	13	18871644	18482172	reverse
107_1	107	13	19651591	19861045	209455	13	20191599	19982145	reverse
107_2	107	13	19861046	20070501	209456	13	19982144	19772689	reverse
676_1	676	13	20071502	20083130	11629	Un	18599788	18611416	unknown
116_1	116	14	1	172860	172860	14	489261	316402	reverse
116_2	116	14	172861	345721	172861	14	316401	143541	reverse
12_1	12	14	346722	836575	489854	14	762169	1252022	forward
12_2	12	14	836576	1326429	489854	14	1252023	1741876	forward
12_3	12	14	1326430	1816283	489854	14	1741877	2231730	forward
12_4	12	14	1816284	2306137	489854	14	2231731	2721584	forward
12_5	12	14	2306138	2795991	489854	14	2721585	3211438	forward
12_6	12	14	2795992	3285845	489854	14	3211439	3701292	forward
12_7	12	14	3285846	3775699	489854	14	3701293	4191146	forward
12_8	12	14	3775700	4265553	489854	14	4191147	4681000	forward
12_9	12	14	4265554	4755407	489854	14	4681001	5170854	forward
12_10	12	14	4755408	5245261	489854	14	5170855	5660708	forward
12_11	12	14	5245262	5735115	489854	14	5660709	6150562	forward
12_12	12	14	5735116	6224969	489854	14	6150563	6640416	forward
12_13	12	14	6224970	6714823	489854	14	6640417	7130270	forward
12_14	12	14	6714824	7204677	489854	14	7130271	7620124	forward
12_15	12	14	7204678	7694531	489854	14	7620125	8109978	forward
12_16	12	14	7694532	8184385	489854	14	8109979	8599832	forward
12_17	12	14	8184386	8674240	489855	14	8599833	9089687	forward
12_18	12	14	8674241	9164095	489855	14	9089688	9579542	forward
12_19	12	14	9164096	9653950	489855	14	9579543	10069397	forward
12_20	12	14	9653951	10143805	489855	14	10069398	10559252	forward
12_21	12	14	10143806	10633660	489855	14	10559253	11049107	forward
12_22	12	14	10633661	11123515	489855	14	11049108	11538962	forward
12_23	12	14	11123516	11613370	489855	14	11538963	12028817	forward
12_24	12	14	11613371	12103225	489855	14	12028818	12518672	forward
12_25	12	14	12103226	12593080	489855	14	12518673	13008527	forward
12_26	12	14	12593081	13082935	489855	14	13008528	13498382	forward
40_1	40	14	13083936	13516440	432505	14	15661908	15229404	reverse
40_2	40	14	13516441	13948945	432505	14	15229403	14796899	reverse
40_3	40	14	13948946	14381450	432505	14	14796898	14364394	reverse
40_4	40	14	14381451	14813955	432505	14	14364393	13931889	reverse
40_5	40	14	14813956	15246461	432506	14	13931888	13499383	reverse
110_1	110	15	1	170770	170770	15	341541	170772	reverse
110_2	110	15	170771	341541	170771	15	170771	1	reverse
72_1	72	15	342542	706204	363663	15	1386415	1022753	reverse
72_2	72	15	706205	1069868	363664	15	1022752	659089	reverse
10_1	10	15	1070869	1563792	492924	15	1387416	1880339	forward
10_2	10	15	1563793	2056716	492924	15	1880340	2373263	forward
10_3	10	15	2056717	2549640	492924	15	2373264	2866187	forward
10_4	10	15	2549641	3042564	492924	15	2866188	3359111	forward
10_5	10	15	3042565	3535488	492924	15	3359112	3852035	forward
10_6	10	15	3535489	4028412	492924	15	3852036	4344959	forward
10_7	10	15	4028413	4521336	492924	15	4344960	4837883	forward
10_8	10	15	4521337	5014260	492924	15	4837884	5330807	forward
10_9	10	15	5014261	5507185	492925	15	5330808	5823732	forward
10_10	10	15	5507186	6000110	492925	15	5823733	6316657	forward
10_11	10	15	6000111	6493035	492925	15	6316658	6809582	forward
10_12	10	15	6493036	6985960	492925	15	6809583	7302507	forward
10_13	10	15	6985961	7478885	492925	15	7302508	7795432	forward
10_14	10	15	7478886	7971810	492925	15	7795433	8288357	forward
10_15	10	15	7971811	8464735	492925	15	8288358	8781282	forward
10_16	10	15	8464736	8957660	492925	15	8781283	9274207	forward
10_17	10	15	8957661	9450585	492925	15	9274208	9767132	forward
10_18	10	15	9450586	9943510	492925	15	9767133	10260057	forward
10_19	10	15	9943511	10436435	492925	15	10260058	10752982	forward
10_20	10	15	10436436	10929360	492925	15	10752983	11245907	forward
10_21	10	15	10929361	11422285	492925	15	11245908	11738832	forward
10_22	10	15	11422286	11915210	492925	15	11738833	12231757	forward
10_23	10	15	11915211	12408135	492925	15	12231758	12724682	forward
10_24	10	15	12408136	12901060	492925	15	12724683	13217607	forward
10_25	10	15	12901061	13393985	492925	15	13217608	13710532	forward
10_26	10	15	13393986	13886910	492925	15	13710533	14203457	forward
10_27	10	15	13886911	14379835	492925	15	14203458	14696382	forward
45_1	45	15	14380836	14833094	452259	15	16758673	16306415	reverse
45_2	45	15	14833095	15285353	452259	15	16306414	15854156	reverse
45_3	45	15	15285354	15737612	452259	15	15854155	15401897	reverse
45_4	45	15	15737613	16189872	452260	15	15401896	14949637	reverse
968_1	968	15	16190873	16198764	7892	Un	21727246	21735137	unknown
26_1	26	16	1	480127	480127	16	1	480127	forward
26_2	26	16	480128	960254	480127	16	480128	960254	forward
26_3	26	16	960255	1440381	480127	16	960255	1440381	forward
26_4	26	16	1440382	1920508	480127	16	1440382	1920508	forward
26_5	26	16	1920509	2400635	480127	16	1920509	2400635	forward
26_6	26	16	2400636	2880762	480127	16	2400636	2880762	forward
26_7	26	16	2880763	3360890	480128	16	2880763	3360890	forward
26_8	26	16	3360891	3841018	480128	16	3360891	3841018	forward
26_9	26	16	3841019	4321146	480128	16	3841019	4321146	forward
26_10	26	16	4321147	4801274	480128	16	4321147	4801274	forward
26_11	26	16	4801275	5281402	480128	16	4801275	5281402	forward
14_1	14	16	5282403	5777235	494833	16	5282403	5777235	forward
14_2	14	16	5777236	6272068	494833	16	5777236	6272068	forward
14_3	14	16	6272069	6766901	494833	16	6272069	6766901	forward
14_4	14	16	6766902	7261735	494834	16	6766902	7261735	forward
14_5	14	16	7261736	7756569	494834	16	7261736	7756569	forward
14_6	14	16	7756570	8251403	494834	16	7756570	8251403	forward
14_7	14	16	8251404	8746237	494834	16	8251404	8746237	forward
14_8	14	16	8746238	9241071	494834	16	8746238	9241071	forward
14_9	14	16	9241072	9735905	494834	16	9241072	9735905	forward
14_10	14	16	9735906	10230739	494834	16	9735906	10230739	forward
14_11	14	16	10230740	10725573	494834	16	10230740	10725573	forward
14_12	14	16	10725574	11220407	494834	16	10725574	11220407	forward
14_13	14	16	11220408	11715241	494834	16	11220408	11715241	forward
14_14	14	16	11715242	12210075	494834	16	11715242	12210075	forward
14_15	14	16	12210076	12704909	494834	16	12210076	12704909	forward
14_16	14	16	12704910	13199743	494834	16	12704910	13199743	forward
14_17	14	16	13199744	13694577	494834	16	13199744	13694577	forward
14_18	14	16	13694578	14189411	494834	16	13694578	14189411	forward
14_19	14	16	14189412	14684245	494834	16	14189412	14684245	forward
14_20	14	16	14684246	15179079	494834	16	14684246	15179079	forward
14_21	14	16	15179080	15673913	494834	16	15179080	15673913	forward
14_22	14	16	15673914	16168747	494834	16	15673914	16168747	forward
44_1	44	16	16169748	16656257	486510	16	18115788	17629279	reverse
44_2	44	16	16656258	17142767	486510	16	17629278	17142769	reverse
44_3	44	16	17142768	17629277	486510	16	17142768	16656259	reverse
44_4	44	16	17629278	18115788	486511	16	16656258	16169748	reverse
109_1	109	17	1	204806	204806	17	954347	749542	reverse
109_2	109	17	204807	409613	204807	17	749541	544735	reverse
136_1	136	17	410614	526061	115448	17	1186244	1070797	reverse
136_2	136	17	526062	641510	115449	17	1070796	955348	reverse
191_1	191	17	642511	704193	61683	17	1187245	1248927	unknown
191_2	191	17	704194	765877	61684	17	1248928	1310611	unknown
174_1	174	17	766878	851045	84168	17	1311612	1395779	forward
174_2	174	17	851046	935213	84168	17	1395780	1479947	forward
25_1	25	17	936214	1395541	459328	17	1480948	1940275	forward
25_2	25	17	1395542	1854869	459328	17	1940276	2399603	forward
25_3	25	17	1854870	2314197	459328	17	2399604	2858931	forward
25_4	25	17	2314198	2773525	459328	17	2858932	3318259	forward
25_5	25	17	2773526	3232854	459329	17	3318260	3777588	forward
25_6	25	17	3232855	3692183	459329	17	3777589	4236917	forward
25_7	25	17	3692184	4151512	459329	17	4236918	4696246	forward
25_8	25	17	4151513	4610841	459329	17	4696247	5155575	forward
25_9	25	17	4610842	5070170	459329	17	5155576	5614904	forward
25_10	25	17	5070171	5529499	459329	17	5614905	6074233	forward
25_11	25	17	5529500	5988828	459329	17	6074234	6533562	forward
25_12	25	17	5988829	6448157	459329	17	6533563	6992891	forward
18_1	18	17	6449158	6928803	479646	17	12100153	12579798	forward
18_2	18	17	6928804	7408449	479646	17	12579799	13059444	forward
18_3	18	17	7408450	7888095	479646	17	13059445	13539090	forward
18_4	18	17	7888096	8367741	479646	17	13539091	14018736	forward
18_5	18	17	8367742	8847387	479646	17	14018737	14498382	forward
18_6	18	17	8847388	9327033	479646	17	14498383	14978028	forward
18_7	18	17	9327034	9806679	479646	17	14978029	15457674	forward
18_8	18	17	9806680	10286325	479646	17	15457675	15937320	forward
18_9	18	17	10286326	10765971	479646	17	15937321	16416966	forward
18_10	18	17	10765972	11245617	479646	17	16416967	16896612	forward
18_11	18	17	11245618	11725263	479646	17	16896613	17376258	forward
18_12	18	17	11725264	12204909	479646	17	17376259	17855904	forward
18_13	18	17	12204910	12684555	479646	17	17855905	18335550	forward
18_14	18	17	12684556	13164201	479646	17	18335551	18815196	forward
18_15	18	17	13164202	13643847	479646	17	18815197	19294842	forward
18_16	18	17	13643848	14123494	479647	17	19294843	19774489	forward
18_17	18	17	14123495	14603141	479647	17	19774490	20254136	forward
29_1	29	18	1	482259	482259	18	1	482259	forward
29_2	29	18	482260	964518	482259	18	482260	964518	forward
29_3	29	18	964519	1446777	482259	18	964519	1446777	forward
29_4	29	18	1446778	1929036	482259	18	1446778	1929036	forward
29_5	29	18	1929037	2411295	482259	18	1929037	2411295	forward
29_6	29	18	2411296	2893554	482259	18	2411296	2893554	forward
29_7	29	18	2893555	3375814	482260	18	2893555	3375814	forward
29_8	29	18	3375815	3858074	482260	18	3375815	3858074	forward
29_9	29	18	3858075	4340334	482260	18	3858075	4340334	forward
29_10	29	18	4340335	4822594	482260	18	4340335	4822594	forward
21_1	21	18	4823595	5317222	493628	18	4823595	5317222	forward
21_2	21	18	5317223	5810850	493628	18	5317223	5810850	forward
21_3	21	18	5810851	6304478	493628	18	5810851	6304478	forward
21_4	21	18	6304479	6798106	493628	18	6304479	6798106	forward
21_5	21	18	6798107	7291734	493628	18	6798107	7291734	forward
21_6	21	18	7291735	7785362	493628	18	7291735	7785362	forward
21_7	21	18	7785363	8278990	493628	18	7785363	8278990	forward
21_8	21	18	8278991	8772618	493628	18	8278991	8772618	forward
21_9	21	18	8772619	9266246	493628	18	8772619	9266246	forward
21_10	21	18	9266247	9759875	493629	18	9266247	9759875	forward
21_11	21	18	9759876	10253504	493629	18	9759876	10253504	forward
21_12	21	18	10253505	10747133	493629	18	10253505	10747133	forward
21_13	21	18	10747134	11240762	493629	18	10747134	11240762	forward
21_14	21	18	11240763	11734391	493629	18	11240763	11734391	forward
21_15	21	18	11734392	12228020	493629	18	11734392	12228020	forward
32_1	32	18	12229021	12699229	470209	18	12229021	12699229	forward
32_2	32	18	12699230	13169438	470209	18	12699230	13169438	forward
32_3	32	18	13169439	13639647	470209	18	13169439	13639647	forward
32_4	32	18	13639648	14109856	470209	18	13639648	14109856	forward
32_5	32	18	14109857	14580065	470209	18	14109857	14580065	forward
32_6	32	18	14580066	15050274	470209	18	14580066	15050274	forward
32_7	32	18	15050275	15520483	470209	18	15050275	15520483	forward
32_8	32	18	15520484	15990693	470210	18	15520484	15990693	forward
124_1	124	18	15991694	16137204	145511	Un	296501	442011	unknown
124_2	124	18	16137205	16282716	145512	Un	442012	587523	unknown
85_1	85	19	1	264824	264824	19	1	264824	forward
85_2	85	19	264825	529649	264825	19	264825	529649	forward
34_1	34	19	530650	1001021	470372	19	693561	1163932	forward
34_2	34	19	1001022	1471393	470372	19	1163933	1634304	forward
34_3	34	19	1471394	1941765	470372	19	1634305	2104676	forward
34_4	34	19	1941766	2412137	470372	19	2104677	2575048	forward
34_5	34	19	2412138	2882509	470372	19	2575049	3045420	forward
34_6	34	19	2882510	3352881	470372	19	3045421	3515792	forward
34_7	34	19	3352882	3823253	470372	19	3515793	3986164	forward
3_1	3	19	3824254	4321719	497466	19	20612724	20115259	reverse
3_2	3	19	4321720	4819185	497466	19	20115258	19617793	reverse
3_3	3	19	4819186	5316651	497466	19	19617792	19120327	reverse
3_4	3	19	5316652	5814117	497466	19	19120326	18622861	reverse
3_5	3	19	5814118	6311584	497467	19	18622860	18125394	reverse
3_6	3	19	6311585	6809051	497467	19	18125393	17627927	reverse
3_7	3	19	6809052	7306518	497467	19	17627926	17130460	reverse
3_8	3	19	7306519	7803985	497467	19	17130459	16632993	reverse
3_9	3	19	7803986	8301452	497467	19	16632992	16135526	reverse
3_10	3	19	8301453	8798919	497467	19	16135525	15638059	reverse
3_11	3	19	8798920	9296386	497467	19	15638058	15140592	reverse
3_12	3	19	9296387	9793853	497467	19	15140591	14643125	reverse
3_13	3	19	9793854	10291320	497467	19	14643124	14145658	reverse
3_14	3	19	10291321	10788787	497467	19	14145657	13648191	reverse
3_15	3	19	10788788	11286254	497467	19	13648190	13150724	reverse
3_16	3	19	11286255	11783721	497467	19	13150723	12653257	reverse
3_17	3	19	11783722	12281188	497467	19	12653256	12155790	reverse
3_18	3	19	12281189	12778655	497467	19	12155789	11658323	reverse
3_19	3	19	12778656	13276122	497467	19	11658322	11160856	reverse
3_20	3	19	13276123	13773589	497467	19	11160855	10663389	reverse
3_21	3	19	13773590	14271056	497467	19	10663388	10165922	reverse
3_22	3	19	14271057	14768523	497467	19	10165921	9668455	reverse
3_23	3	19	14768524	15265990	497467	19	9668454	9170988	reverse
3_24	3	19	15265991	15763457	497467	19	9170987	8673521	reverse
3_25	3	19	15763458	16260924	497467	19	8673520	8176054	reverse
3_26	3	19	16260925	16758391	497467	19	8176053	7678587	reverse
3_27	3	19	16758392	17255858	497467	19	7678586	7181120	reverse
3_28	3	19	17255859	17753325	497467	19	7181119	6683653	reverse
3_29	3	19	17753326	18250792	497467	19	6683652	6186186	reverse
3_30	3	19	18250793	18748259	497467	19	6186185	5688719	reverse
3_31	3	19	18748260	19245726	497467	19	5688718	5191252	reverse
3_32	3	19	19245727	19743193	497467	19	5191251	4693785	reverse
3_33	3	19	19743194	20240660	497467	19	4693784	4196318	reverse
104_1	104	20	1	207866	207866	20	422922	630787	forward
104_2	104	20	207867	415733	207867	20	630788	838654	forward
170_1	170	20	416734	504417	87684	20	839655	927338	forward
170_2	170	20	504418	592102	87685	20	927339	1015023	forward
143_1	143	20	593103	713121	120019	20	1321812	1441830	forward
143_2	143	20	713122	833141	120020	20	1441831	1561850	forward
2_1	2	20	834142	1323189	489048	20	18679545	18190498	reverse
2_2	2	20	1323190	1812237	489048	20	18190497	17701450	reverse
2_3	2	20	1812238	2301285	489048	20	17701449	17212402	reverse
2_4	2	20	2301286	2790333	489048	20	17212401	16723354	reverse
2_5	2	20	2790334	3279381	489048	20	16723353	16234306	reverse
2_6	2	20	3279382	3768429	489048	20	16234305	15745258	reverse
2_7	2	20	3768430	4257477	489048	20	15745257	15256210	reverse
2_8	2	20	4257478	4746525	489048	20	15256209	14767162	reverse
2_9	2	20	4746526	5235573	489048	20	14767161	14278114	reverse
2_10	2	20	5235574	5724621	489048	20	14278113	13789066	reverse
2_11	2	20	5724622	6213669	489048	20	13789065	13300018	reverse
2_12	2	20	6213670	6702717	489048	20	13300017	12810970	reverse
2_13	2	20	6702718	7191765	489048	20	12810969	12321922	reverse
2_14	2	20	7191766	7680813	489048	20	12321921	11832874	reverse
2_15	2	20	7680814	8169861	489048	20	11832873	11343826	reverse
2_16	2	20	8169862	8658909	489048	20	11343825	10854778	reverse
2_17	2	20	8658910	9147957	489048	20	10854777	10365730	reverse
2_18	2	20	9147958	9637005	489048	20	10365729	9876682	reverse
2_19	2	20	9637006	10126053	489048	20	9876681	9387634	reverse
2_20	2	20	10126054	10615101	489048	20	9387633	8898586	reverse
2_21	2	20	10615102	11104150	489049	20	8898585	8409537	reverse
2_22	2	20	11104151	11593199	489049	20	8409536	7920488	reverse
2_23	2	20	11593200	12082248	489049	20	7920487	7431439	reverse
2_24	2	20	12082249	12571297	489049	20	7431438	6942390	reverse
2_25	2	20	12571298	13060346	489049	20	6942389	6453341	reverse
2_26	2	20	13060347	13549395	489049	20	6453340	5964292	reverse
2_27	2	20	13549396	14038444	489049	20	5964291	5475243	reverse
2_28	2	20	14038445	14527493	489049	20	5475242	4986194	reverse
2_29	2	20	14527494	15016542	489049	20	4986193	4497145	reverse
2_30	2	20	15016543	15505591	489049	20	4497144	4008096	reverse
2_31	2	20	15505592	15994640	489049	20	4008095	3519047	reverse
2_32	2	20	15994641	16483689	489049	20	3519046	3029998	reverse
2_33	2	20	16483690	16972738	489049	20	3029997	2540949	reverse
2_34	2	20	16972739	17461787	489049	20	2540948	2051900	reverse
2_35	2	20	17461788	17950836	489049	20	2051899	1562851	reverse
46_1	46	20	17951837	18396894	445058	20	18680546	19125603	forward
46_2	46	20	18396895	18841953	445059	20	19125604	19570662	forward
46_3	46	20	18841954	19287012	445059	20	19570663	20015721	forward
46_4	46	20	19287013	19732071	445059	20	20015722	20460780	forward
144_1	144	21	1	148535	148535	21	1494736	1643270	unknown
144_2	144	21	148536	297070	148535	21	1643271	1791805	unknown
16_1	16	21	298071	782104	484034	21	4442219	4926252	forward
16_2	16	21	782105	1266138	484034	21	4926253	5410286	forward
16_3	16	21	1266139	1750172	484034	21	5410287	5894320	forward
16_4	16	21	1750173	2234207	484035	21	5894321	6378355	forward
16_5	16	21	2234208	2718242	484035	21	6378356	6862390	forward
16_6	16	21	2718243	3202277	484035	21	6862391	7346425	forward
16_7	16	21	3202278	3686312	484035	21	7346426	7830460	forward
16_8	16	21	3686313	4170347	484035	21	7830461	8314495	forward
16_9	16	21	4170348	4654382	484035	21	8314496	8798530	forward
16_10	16	21	4654383	5138417	484035	21	8798531	9282565	forward
16_11	16	21	5138418	5622452	484035	21	9282566	9766600	forward
16_12	16	21	5622453	6106487	484035	21	9766601	10250635	forward
16_13	16	21	6106488	6590522	484035	21	10250636	10734670	forward
16_14	16	21	6590523	7074557	484035	21	10734671	11218705	forward
16_15	16	21	7074558	7558592	484035	21	11218706	11702740	forward
16_16	16	21	7558593	8042627	484035	21	11702741	12186775	forward
16_17	16	21	8042628	8526662	484035	21	12186776	12670810	forward
16_18	16	21	8526663	9010697	484035	21	12670811	13154845	forward
16_19	16	21	9010698	9494732	484035	21	13154846	13638880	forward
43_1	43	21	9495733	9971441	475709	21	13639881	14115589	forward
43_2	43	21	9971442	10447150	475709	21	14115590	14591298	forward
43_3	43	21	10447151	10922859	475709	21	14591299	15067007	forward
43_4	43	21	10922860	11398568	475709	21	15067008	15542716	forward
127_1	127	21	11399569	11532951	133383	21	16438087	16571469	forward
127_2	127	21	11532952	11666335	133384	21	16571470	16704853	forward
257_1	257	21	11667336	11717487	50152	Un	10615548	10665699	unknown
27_1	27	Un	1	464114	464114	17	12099152	11635039	reverse
27_2	27	Un	464115	928228	464114	17	11635038	11170925	reverse
27_3	27	Un	928229	1392342	464114	17	11170924	10706811	reverse
27_4	27	Un	1392343	1856456	464114	17	10706810	10242697	reverse
27_5	27	Un	1856457	2320571	464115	17	10242696	9778582	reverse
27_6	27	Un	2320572	2784686	464115	17	9778581	9314467	reverse
27_7	27	Un	2784687	3248801	464115	17	9314466	8850352	reverse
27_8	27	Un	3248802	3712916	464115	17	8850351	8386237	reverse
27_9	27	Un	3712917	4177031	464115	17	8386236	7922122	reverse
27_10	27	Un	4177032	4641146	464115	17	7922121	7458007	reverse
27_11	27	Un	4641147	5105261	464115	17	7458006	6993892	reverse
37_1	37	Un	5106262	5547663	441402	21	1792806	2234207	forward
37_2	37	Un	5547664	5989065	441402	21	2234208	2675609	forward
37_3	37	Un	5989066	6430467	441402	21	2675610	3117011	forward
37_4	37	Un	6430468	6871869	441402	21	3117012	3558413	forward
37_5	37	Un	6871870	7313271	441402	21	3558414	3999815	forward
37_6	37	Un	7313272	7754674	441403	21	3999816	4441218	forward
47_1	47	Un	7755675	8192719	437045	7	13063462	12626418	reverse
47_2	47	Un	8192720	8629764	437045	7	12626417	12189373	reverse
47_3	47	Un	8629765	9066809	437045	7	12189372	11752328	reverse
47_4	47	Un	9066810	9503854	437045	7	11752327	11315283	reverse
48_1	48	Un	9504855	9939600	434746	5	1213557	1648302	forward
48_2	48	Un	9939601	10374346	434746	5	1648303	2083048	forward
48_3	48	Un	10374347	10809093	434747	5	2083049	2517795	forward
48_4	48	Un	10809094	11243840	434747	5	2517796	2952542	forward
54_1	54	Un	11244841	11649025	404185	5	1	404185	forward
54_2	54	Un	11649026	12053210	404185	5	404186	808370	forward
54_3	54	Un	12053211	12457396	404186	5	808371	1212556	forward
56_1	56	Un	12458397	12848036	389640	8	1	389640	forward
56_2	56	Un	12848037	13237676	389640	8	389641	779280	forward
56_3	56	Un	13237677	13627317	389641	8	779281	1168921	forward
58_1	58	Un	13628318	13998362	370045	10	2078147	1708103	reverse
58_2	58	Un	13998363	14368407	370045	10	1708102	1338058	reverse
58_3	58	Un	14368408	14738452	370045	10	1338057	968013	reverse
61_1	61	Un	14739453	15073422	333970	6	1001911	667942	reverse
61_2	61	Un	15073423	15407392	333970	6	667941	333972	reverse
61_3	61	Un	15407393	15741363	333971	6	333971	1	reverse
67_1	67	Un	15742364	16189048	446685	21	15543717	15990401	forward
67_2	67	Un	16189049	16635733	446685	21	15990402	16437086	forward
68_1	68	Un	16636734	17071319	434586	12	2550357	2984942	forward
68_2	68	Un	17071320	17505905	434586	12	2984943	3419528	forward
69_1	69	Un	17506906	17913693	406788	16	19411845	19005058	reverse
69_2	69	Un	17913694	18320481	406788	16	19005057	18598270	reverse
74_1	74	Un	18321482	18662692	341211	1	28063545	28404755	forward
74_2	74	Un	18662693	19003903	341211	1	28404756	28745966	forward
76_1	76	Un	19004904	19302990	298087	6	2484841	2186755	reverse
76_2	76	Un	19302991	19601078	298088	6	2186754	1888667	reverse
80_1	80	Un	19602079	19897696	295618	11	1	295618	forward
80_2	80	Un	19897697	20193314	295618	11	295619	591236	forward
84_1	84	Un	20194315	20476030	281716	15	16759674	17041389	forward
84_2	84	Un	20476031	20757747	281717	15	17041390	17323106	forward
88_1	88	Un	20758748	21013173	254426	14	16171761	15917336	reverse
88_2	88	Un	21013174	21267600	254427	14	15917335	15662909	reverse
89_1	89	Un	21268601	21540467	271867	17	1	271867	forward
89_2	89	Un	21540468	21812334	271867	17	271868	543734	forward
90_1	90	Un	21813335	22067871	254537	4	34153411	33898875	reverse
90_2	90	Un	22067872	22322408	254537	4	33898874	33644338	reverse
94_1	94	Un	22323409	22582101	258693	21	1	258693	unknown
94_2	94	Un	22582102	22840795	258694	21	258694	517387	unknown
95_1	95	Un	22841796	23092009	250214	21	518388	768601	forward
95_2	95	Un	23092010	23342223	250214	21	768602	1018815	forward
98_1	98	Un	23343224	23549011	205788	2	411577	205790	reverse
98_2	98	Un	23549012	23754800	205789	2	205789	1	reverse
99_1	99	Un	23755801	23966124	210324	12	2549356	2339033	reverse
99_2	99	Un	23966125	24176448	210324	12	2339032	2128709	reverse
101_1	101	Un	24177449	24369759	192311	10	967012	774702	reverse
101_2	101	Un	24369760	24562071	192312	10	774701	582390	reverse
106_1	106	Un	24563072	24749755	186684	7	10940915	11127598	forward
106_2	106	Un	24749756	24936439	186684	7	11127599	11314282	forward
108_1	108	Un	24937440	25112068	174629	4	23794173	23619545	reverse
108_2	108	Un	25112069	25286697	174629	4	23619544	23444916	reverse
111_1	111	Un	25287698	25459635	171938	10	1	171938	forward
111_2	111	Un	25459636	25631573	171938	10	171939	343876	forward
112_1	112	Un	25632574	25811400	178827	5	15053934	14875108	reverse
112_2	112	Un	25811401	25990228	178828	5	14875107	14696280	reverse
114_1	114	Un	25991229	26175874	184646	12	1	184646	forward
114_2	114	Un	26175875	26360520	184646	12	184647	369292	forward
115_1	115	Un	26361521	26533529	172009	16	18460807	18288799	reverse
115_2	115	Un	26533530	26705539	172010	16	18288798	18116789	reverse
119_1	119	Un	26706540	26851619	145080	1	20403457	20548536	forward
119_2	119	Un	26851620	26996700	145081	1	20548537	20693617	forward
120_1	120	Un	26997701	27149251	151551	3	17648549	17496999	reverse
120_2	120	Un	27149252	27300803	151552	3	17496998	17345447	reverse
121_1	121	Un	27301804	27497750	195947	4	33376101	33180155	reverse
121_2	121	Un	27497751	27693698	195948	4	33180154	32984207	reverse
122_1	122	Un	27694699	27847092	152394	20	1016024	1168417	forward
122_2	122	Un	27847093	27999486	152394	20	1168418	1320811	forward
126_1	126	Un	28000487	28145924	145438	21	16705854	16851291	forward
126_2	126	Un	28145925	28291363	145439	21	16851292	16996730	forward
128_1	128	Un	28292364	28417990	125627	15	14948636	14823010	reverse
128_2	128	Un	28417991	28543617	125627	15	14823009	14697383	reverse
129_1	129	Un	28544618	28681961	137344	7	274688	137345	reverse
129_2	129	Un	28681962	28819305	137344	7	137344	1	reverse
130_1	130	Un	28820306	28938561	118256	10	581389	463134	reverse
130_2	130	Un	28938562	29056818	118257	10	463133	344877	reverse
131_1	131	Un	29057819	29183966	126148	7	275689	401836	forward
131_2	131	Un	29183967	29310115	126149	7	401837	527985	forward
132_1	132	Un	29311116	29440825	129710	7	30267080	30396789	forward
132_2	132	Un	29440826	29570536	129711	7	30396790	30526500	forward
133_1	133	Un	29571537	29704739	133203	13	20486356	20619558	unknown
133_2	133	Un	29704740	29837943	133204	13	20619559	20752762	unknown
134_1	134	Un	29838944	29967512	128569	21	1019816	1148384	unknown
134_2	134	Un	29967513	30096081	128569	21	1148385	1276953	unknown
135_1	135	Un	30097082	30220114	123033	3	17344446	17221414	reverse
135_2	135	Un	30220115	30343148	123034	3	17221413	17098380	reverse
137_1	137	Un	30344149	30469020	124872	20	172177	297048	forward
137_2	137	Un	30469021	30593893	124873	20	297049	421921	forward
139_1	139	Un	30594894	30706348	111455	12	593203	481749	reverse
139_2	139	Un	30706349	30817804	111456	12	481748	370293	reverse
141_1	141	Un	30818805	30928584	109780	Un	847599	957378	unknown
141_2	141	Un	30928585	31038364	109780	Un	957379	1067158	unknown
145_1	145	Un	31039365	31187114	147750	Un	1	147750	unknown
145_2	145	Un	31187115	31334864	147750	Un	147751	295500	unknown
146_1	146	Un	31335865	31448129	112265	21	17222261	17109997	reverse
146_2	146	Un	31448130	31560395	112266	21	17109996	16997731	reverse
147_1	147	Un	31561396	31669286	107891	21	1277954	1385844	unknown
147_2	147	Un	31669287	31777177	107891	21	1385845	1493735	unknown
148_1	148	Un	31778178	31876631	98454	12	20575214	20673667	forward
148_2	148	Un	31876632	31975086	98455	12	20673668	20772122	forward
149_1	149	Un	31976087	32069761	93675	10	16621357	16715031	forward
149_2	149	Un	32069762	32163437	93676	10	16715032	16808707	forward
150_1	150	Un	32164438	32259677	95240	13	20485355	20390116	reverse
150_2	150	Un	32259678	32354918	95241	13	20390115	20294875	reverse
151_1	151	Un	32355919	32451606	95688	11	15901064	15996751	forward
151_2	151	Un	32451607	32547295	95689	11	15996752	16092440	forward
152_1	152	Un	32548296	32681413	133118	4	33643337	33510220	reverse
152_2	152	Un	32681414	32814531	133118	4	33510219	33377102	reverse
154_1	154	Un	32815532	32907651	92120	Un	1856195	1948314	unknown
154_2	154	Un	32907652	32999772	92121	Un	1948315	2040435	unknown
155_1	155	Un	33000773	33096108	95336	Un	1477146	1572481	unknown
155_2	155	Un	33096109	33191444	95336	Un	1572482	1667817	unknown
156_1	156	Un	33192445	33277554	85110	6	18684762	18769871	forward
156_2	156	Un	33277555	33362665	85111	6	18769872	18854982	forward
157_1	157	Un	33363666	33449253	85588	20	1	85588	forward
157_2	157	Un	33449254	33534841	85588	20	85589	171176	forward
159_1	159	Un	33535842	33619266	83425	15	342542	425966	forward
159_2	159	Un	33619267	33702692	83426	15	425967	509392	forward
160_1	160	Un	33703693	33782734	79042	Un	2566246	2645287	unknown
160_2	160	Un	33782735	33861776	79042	Un	2645288	2724329	unknown
161_1	161	Un	33862777	33941867	79091	3	17649550	17728640	forward
161_2	161	Un	33941868	34020958	79091	3	17728641	17807731	forward
162_1	162	Un	34021959	34109491	87533	Un	2041436	2128968	unknown
162_2	162	Un	34109492	34197025	87534	Un	2128969	2216502	unknown
163_1	163	Un	34198026	34278980	80955	19	692560	611606	reverse
163_2	163	Un	34278981	34359936	80956	19	611605	530650	reverse
164_1	164	Un	34360937	34489973	129037	Un	588524	717560	unknown
164_2	164	Un	34489974	34619011	129038	Un	717561	846598	unknown
165_1	165	Un	34620012	34704198	84187	1	1857131	1941317	forward
165_2	165	Un	34704199	34788385	84187	1	1941318	2025504	forward
166_1	166	Un	34789386	34887977	98592	Un	1278962	1377553	unknown
166_2	166	Un	34887978	34986569	98592	Un	1377554	1476145	unknown
167_1	167	Un	34987570	35065026	77457	11	592237	669693	unknown
167_2	167	Un	35065027	35142483	77457	11	669694	747150	unknown
168_1	168	Un	35143484	35220722	77239	14	761168	683930	reverse
168_2	168	Un	35220723	35297961	77239	14	683929	606691	reverse
169_1	169	Un	35298962	35376096	77135	3	14737948	14815082	forward
169_2	169	Un	35376097	35453231	77135	3	14815083	14892217	forward
171_1	171	Un	35454232	35547419	93188	Un	1668818	1762005	unknown
171_2	171	Un	35547420	35640608	93189	Un	1762006	1855194	unknown
172_1	172	Un	35641609	35728877	87269	Un	2217503	2304771	unknown
172_2	172	Un	35728878	35816147	87270	Un	2304772	2392041	unknown
173_1	173	Un	35817148	35922048	104901	Un	1068159	1173059	unknown
173_2	173	Un	35922049	36026950	104902	Un	1173060	1277961	unknown
175_1	175	Un	36027951	36113661	85711	1	1684708	1770418	forward
175_2	175	Un	36113662	36199373	85712	1	1770419	1856130	forward
176_1	176	Un	36200374	36271643	71270	14	1	71270	unknown
176_2	176	Un	36271644	36342913	71270	14	71271	142540	unknown
177_1	177	Un	36343914	36418411	74498	9	19835920	19910417	forward
177_2	177	Un	36418412	36492910	74499	9	19910418	19984916	forward
178_1	178	Un	36493911	36561471	67561	Un	3171424	3238984	unknown
178_2	178	Un	36561472	36629033	67562	Un	3238985	3306546	unknown
179_1	179	Un	36630034	36708083	78050	Un	2725330	2803379	unknown
179_2	179	Un	36708084	36786134	78051	Un	2803380	2881430	unknown
180_1	180	Un	36787135	36856035	68901	12	742525	811425	unknown
180_2	180	Un	36856036	36924936	68901	12	811426	880326	unknown
181_1	181	Un	36925937	36993667	67731	16	18461808	18529538	forward
181_2	181	Un	36993668	37061398	67731	16	18529539	18597269	forward
182_1	182	Un	37062399	37129653	67255	21	17357772	17290518	reverse
182_2	182	Un	37129654	37196909	67256	21	17290517	17223262	reverse
184_1	184	Un	37197910	37271757	73848	15	658088	584241	reverse
184_2	184	Un	37271758	37345605	73848	15	584240	510393	reverse
185_1	185	Un	37346606	37422313	75708	Un	2882431	2958138	unknown
185_2	185	Un	37422314	37498022	75709	Un	2958139	3033847	unknown
186_1	186	Un	37499023	37568201	69179	1	541083	610261	unknown
186_2	186	Un	37568202	37637380	69179	1	610262	679440	unknown
187_1	187	Un	37638381	37695937	57557	Un	3920214	3977770	unknown
187_2	187	Un	37695938	37753494	57557	Un	3977771	4035327	unknown
188_1	188	Un	37754495	37815103	60609	Un	3561414	3622022	unknown
188_2	188	Un	37815104	37875713	60610	Un	3622023	3682632	unknown
192_1	192	Un	37876714	37944501	67788	Un	3034848	3102635	unknown
192_2	192	Un	37944502	38012289	67788	Un	3102636	3170423	unknown
193_1	193	Un	38013290	38063814	50525	Un	4145405	4195929	unknown
193_2	193	Un	38063815	38114339	50525	Un	4195930	4246454	unknown
194_1	194	Un	38115340	38173981	58642	Un	3801929	3860570	unknown
194_2	194	Un	38173982	38232624	58643	Un	3860571	3919213	unknown
195_1	195	Un	38233625	38307284	73660	12	741524	667865	reverse
195_2	195	Un	38307285	38380945	73661	12	667864	594204	reverse
196_1	196	Un	38381946	38480572	98627	Un	4448777	4547403	unknown
197_1	197	Un	38481573	38539286	57714	14	490262	547975	forward
197_2	197	Un	38539287	38597001	57715	14	547976	605690	forward
198_1	198	Un	38598002	38652354	54353	9	19608295	19662647	unknown
198_2	198	Un	38652355	38706708	54354	9	19662648	19717001	unknown
199_1	199	Un	38707709	38805661	97953	Un	4548404	4646356	unknown
200_1	200	Un	38806662	38857298	50637	13	20192600	20243236	unknown
200_2	200	Un	38857299	38907936	50638	13	20243237	20293874	unknown
201_1	201	Un	38908937	38980237	71301	3	15431083	15502383	unknown
201_2	201	Un	38980238	39051539	71302	3	15502384	15573685	unknown
202_1	202	Un	39052540	39107413	54874	16	19522594	19467721	reverse
202_2	202	Un	39107414	39162288	54875	16	19467720	19412846	reverse
203_1	203	Un	39163289	39217326	54038	Un	4036328	4090365	unknown
203_2	203	Un	39217327	39271365	54039	Un	4090366	4144404	unknown
204_1	204	Un	39272366	39363831	91466	Un	5220223	5311688	unknown
205_1	205	Un	39364832	39428056	63225	Un	3307547	3370771	unknown
205_2	205	Un	39428057	39491281	63225	Un	3370772	3433996	unknown
206_1	206	Un	39492282	39591840	99559	Un	4348218	4447776	unknown
207_1	207	Un	39592841	39651488	58648	Un	3683633	3742280	unknown
207_1	207	Un	39651489	39710136	58648	Un	3742281	3800928	unknown
208_1	208	Un	39711137	39765810	54674	10	16919056	16864383	reverse
208_2	208	Un	39765811	39820485	54675	10	16864382	16809708	reverse
209_1	209	Un	39821486	39909622	88137	Un	5495227	5583363	unknown
210_1	210	Un	39910623	39994605	83983	Un	5846488	5930470	unknown
211_1	211	Un	39995606	40077297	81692	Un	5931471	6013162	unknown
212_1	212	Un	40078298	40164279	85982	Un	5673108	5759089	unknown
213_1	213	Un	40165280	40250677	85398	Un	5760090	5845487	unknown
214_1	214	Un	40251678	40339421	87744	Un	5584364	5672107	unknown
215_1	215	Un	40340422	40434995	94574	Un	4935609	5030182	unknown
216_1	216	Un	40435996	40530711	94716	Un	4839893	4934608	unknown
217_1	217	Un	40531712	40613024	81313	Un	6014163	6095475	unknown
218_1	218	Un	40614025	40703418	89394	Un	5404833	5494226	unknown
219_1	219	Un	40704419	40783668	79250	Un	6178444	6257693	unknown
220_1	220	Un	40784669	40844717	60049	13	19651591	19711639	unknown
220_2	220	Un	40844718	40904766	60049	13	19711640	19771688	unknown
221_1	221	Un	40905767	40979726	73960	Un	6414618	6488577	unknown
223_1	223	Un	40980727	41061694	80968	Un	6096476	6177443	unknown
224_1	224	Un	41062695	41166770	104076	19	3987165	4091240	unknown
224_2	224	Un	41166771	41270847	104077	19	4091241	4195317	unknown
225_1	225	Un	41271848	41362991	91144	Un	5312689	5403832	unknown
226_1	226	Un	41363992	41426699	62708	Un	3434997	3497704	unknown
226_2	226	Un	41426700	41489408	62709	Un	3497705	3560413	unknown
227_1	227	Un	41490409	41590171	99763	Un	4247455	4347217	unknown
228_1	228	Un	41591172	41658831	67660	Un	7208870	7276529	unknown
229_1	229	Un	41659832	41725083	65252	Un	7481035	7546286	unknown
230_1	230	Un	41726084	41793576	67493	Un	7277530	7345022	unknown
231_1	231	Un	41794577	41866531	71955	Un	6637706	6709660	unknown
232_1	232	Un	41867532	41953633	86102	Un	2393042	2479143	unknown
232_2	232	Un	41953634	42039735	86102	Un	2479144	2565245	unknown
233_1	233	Un	42040736	42114227	73492	Un	6489578	6563069	unknown
234_1	234	Un	42115228	42185738	70511	Un	6927996	6998506	unknown
235_1	235	Un	42186739	42250670	63932	Un	7678439	7742370	unknown
236_1	236	Un	42251671	42314880	63210	Un	7743371	7806580	unknown
237_1	237	Un	42315881	42383608	67728	Un	7140142	7207869	unknown
238_1	238	Un	42384609	42446850	62242	Un	7934971	7997212	unknown
239_1	239	Un	42447851	42509289	61439	Un	8124008	8185446	unknown
240_1	240	Un	42510290	42576502	66213	Un	7413822	7480034	unknown
241_1	241	Un	42577503	42637667	60165	Un	8370827	8430991	unknown
242_1	242	Un	42638668	42734078	95411	Un	4647357	4742767	unknown
243_1	243	Un	42735079	42812442	77364	Un	6258694	6336057	unknown
244_1	244	Un	42813443	42864682	51240	9	19985917	20037156	unknown
244_2	244	Un	42864683	42915923	51241	9	20037157	20088397	unknown
245_1	245	Un	42916924	42978615	61692	Un	8061316	8123007	unknown
246_1	246	Un	42979616	43037963	58348	Un	8851863	8910210	unknown
247_1	247	Un	43038964	43093304	54341	Un	9653489	9707829	unknown
248_1	248	Un	43094305	43149449	55145	Un	9430219	9485363	unknown
249_1	249	Un	43150450	43208946	58497	Un	8732915	8791411	unknown
250_1	250	Un	43209947	43282582	72636	Un	6564070	6636705	unknown
251_1	251	Un	43283583	43336528	52946	Un	10090020	10142965	unknown
252_1	252	Un	43337529	43388469	50941	Un	10563607	10614547	unknown
253_1	253	Un	43389470	43454658	65189	Un	7547287	7612475	unknown
254_1	254	Un	43455659	43549593	93935	Un	5031183	5125117	unknown
255_1	255	Un	43550594	43621279	70686	Un	6856310	6926995	unknown
256_1	256	Un	43622280	43680027	57748	Un	8969971	9027718	unknown
258_1	258	Un	43681028	43741336	60309	Un	8309518	8369826	unknown
259_1	259	Un	43742337	43835441	93105	Un	5126118	5219222	unknown
260_1	260	Un	43836442	43892821	56380	Un	9202047	9258426	unknown
261_1	261	Un	43893822	43948169	54348	Un	9598141	9652488	unknown
262_1	262	Un	43949170	44003012	53843	Un	9708830	9762672	unknown
263_1	263	Un	44004013	44058893	54881	Un	9542260	9597140	unknown
264_1	264	Un	44059894	44136453	76560	Un	6337058	6413617	unknown
265_1	265	Un	44137454	44209165	71712	Un	6783598	6855309	unknown
266_1	266	Un	44210166	44266666	56501	Un	9144546	9201046	unknown
267_1	267	Un	44267667	44325426	57760	Un	8911211	8968970	unknown
268_1	268	Un	44326427	44386154	59728	Un	8431992	8491719	unknown
269_1	269	Un	44387155	44431490	44336	Un	10956542	11000877	unknown
270_1	270	Un	44432491	44475220	42730	Un	11135225	11177954	unknown
271_1	271	Un	44476221	44548157	71937	Un	6710661	6782597	unknown
272_1	272	Un	44549158	44605401	56244	Un	9259427	9315670	unknown
273_1	273	Un	44606402	44648496	42095	Un	11178955	11221049	unknown
274_1	274	Un	44649497	44692847	43351	Un	11046612	11089962	unknown
275_1	275	Un	44693848	44735932	42085	Un	11222050	11264134	unknown
276_1	276	Un	44736933	44778502	41570	Un	11265135	11306704	unknown
277_1	277	Un	44779503	44820394	40892	Un	11349613	11390504	unknown
278_1	278	Un	44821395	44890838	69444	Un	6999507	7068950	unknown
279_1	279	Un	44891839	44932111	40273	Un	11391505	11431777	unknown
280_1	280	Un	44933112	44993620	60509	Un	8248009	8308517	unknown
281_1	281	Un	44994621	45063811	69191	Un	7069951	7139141	unknown
282_1	282	Un	45064812	45104696	39885	Un	11473877	11513761	unknown
283_1	283	Un	45105697	45161722	56026	Un	9316671	9372696	unknown
284_1	284	Un	45162723	45202821	40099	Un	11432778	11472876	unknown
285_1	285	Un	45203822	45244729	40908	Un	11307705	11348612	unknown
286_1	286	Un	45245730	45285318	39589	Un	11555366	11594954	unknown
287_1	287	Un	45286319	45348564	62246	Un	7871725	7933970	unknown
288_1	288	Un	45349565	45388744	39180	Un	11595955	11635134	unknown
289_1	289	Un	45389745	45446758	57014	Un	9028719	9085732	unknown
290_1	290	Un	45447759	45510902	63144	Un	7807581	7870724	unknown
291_1	291	Un	45511903	45550564	38662	Un	11636135	11674796	unknown
292_1	292	Un	45551565	45589870	38306	Un	11715287	11753592	unknown
293_1	293	Un	45590871	45642025	51155	Un	10355477	10406631	unknown
294_1	294	Un	45643026	45696553	53528	Un	9818365	9871892	unknown
295_1	295	Un	45697554	45735232	37679	Un	11754593	11792271	unknown
296_1	296	Un	45736233	45794993	58761	Un	8613427	8672187	unknown
297_1	297	Un	45795994	45832164	36171	Un	11830539	11866709	unknown
298_1	298	Un	45833165	45869017	35853	Un	11867710	11903562	unknown
299_1	299	Un	45870018	45905559	35542	Un	11904563	11940104	unknown
300_1	300	Un	45906560	45960251	53692	Un	9763673	9817364	unknown
301_1	301	Un	45961252	46028050	66799	Un	7346023	7412821	unknown
302_1	302	Un	46029051	46067540	38490	Un	11675797	11714286	unknown
303_1	303	Un	46068541	46103086	34546	Un	12119591	12154136	unknown
304_1	304	Un	46104087	46138840	34754	Un	11976889	12011642	unknown
305_1	305	Un	46139841	46174504	34664	Un	12048328	12082991	unknown
306_1	306	Un	46175505	46231026	55522	Un	9373697	9429218	unknown
307_1	307	Un	46232027	46266711	34685	Un	12012643	12047327	unknown
308_1	308	Un	46267712	46326162	58451	Un	8792412	8850862	unknown
309_1	309	Un	46327163	46361761	34599	Un	12083992	12118590	unknown
310_1	310	Un	46362762	46399028	36267	Un	11793272	11829538	unknown
311_1	311	Un	46400029	46460590	60562	Un	8186447	8247008	unknown
312_1	312	Un	46461591	46513489	51899	Un	10197102	10249000	unknown
313_1	313	Un	46514490	46567505	53016	Un	10036004	10089019	unknown
314_1	314	Un	46568506	46603289	34784	Un	11941105	11975888	unknown
315_1	315	Un	46604290	46637550	33261	Un	12155137	12188397	unknown
316_1	316	Un	46638551	46670753	32203	Un	12223276	12255478	unknown
317_1	317	Un	46671754	46724950	53197	Un	9981807	10035003	unknown
318_1	318	Un	46725951	46789913	63963	Un	7613476	7677438	unknown
319_1	319	Un	46790914	46842527	51614	Un	10302863	10354476	unknown
320_1	320	Un	46843528	46875407	31880	Un	12289569	12321448	unknown
321_1	321	Un	46876408	46971532	95125	Un	4743768	4838892	unknown
322_1	322	Un	46972533	47005410	32878	Un	12189398	12222275	unknown
323_1	323	Un	47006411	47059861	53451	Un	9927356	9980806	unknown
324_1	324	Un	47060862	47091664	30803	Un	12354564	12385366	unknown
325_1	325	Un	47092665	47123038	30374	Un	12386367	12416740	unknown
326_1	326	Un	47124039	47177501	53463	Un	9872893	9926355	unknown
327_1	327	Un	47178502	47208678	30177	Un	12417741	12447917	unknown
328_1	328	Un	47209679	47269348	59670	Un	8492720	8552389	unknown
329_1	329	Un	47270349	47300338	29990	Un	12448918	12478907	unknown
330_1	330	Un	47301339	47331052	29714	Un	12479908	12509621	unknown
331_1	331	Un	47332053	47361638	29586	Un	12510622	12540207	unknown
332_1	332	Un	47362639	47393753	31115	Un	12322449	12353563	unknown
333_1	333	Un	47394754	47424273	29520	Un	12541208	12570727	unknown
334_1	334	Un	47425274	47482086	56813	Un	9086733	9143545	unknown
335_1	335	Un	47483087	47532023	48937	Un	10716664	10765600	unknown
336_1	336	Un	47533024	47580034	47011	Un	10815353	10862363	unknown
337_1	337	Un	47581035	47610168	29134	Un	12571728	12600861	unknown
338_1	338	Un	47611169	47662141	50973	Un	10459675	10510647	unknown
339_1	339	Un	47663142	47722178	59037	Un	8553390	8612426	unknown
340_1	340	Un	47723179	47751104	27926	Un	12690564	12718489	unknown
341_1	341	Un	47752105	47803063	50959	Un	10511648	10562606	unknown
342_1	342	Un	47804064	47866166	62103	Un	7998213	8060315	unknown
343_1	343	Un	47867167	47895531	28365	Un	12661199	12689563	unknown
344_1	344	Un	47896532	47928621	32090	Un	12256479	12288568	unknown
345_1	345	Un	47929622	47958094	28473	Un	12631726	12660198	unknown
346_1	346	Un	47959095	47985867	26773	Un	12719490	12746262	unknown
347_1	347	Un	47986868	48013357	26490	Un	12802409	12828898	unknown
348_1	348	Un	48014358	48069253	54896	Un	9486364	9541259	unknown
349_1	349	Un	48070254	48096867	26614	Un	12747263	12773876	unknown
350_1	350	Un	48097868	48156594	58727	Un	8673188	8731914	unknown
351_1	351	Un	48157595	48184126	26532	Un	12774877	12801408	unknown
352_1	352	Un	48185127	48236169	51043	Un	10407632	10458674	unknown
353_1	353	Un	48237170	48266033	28864	Un	12601862	12630725	unknown
354_1	354	Un	48267034	48292501	25468	Un	12883568	12909035	unknown
355_1	355	Un	48293502	48318618	25117	Un	12988918	13014034	unknown
356_1	356	Un	48319619	48365564	45946	Un	10863364	10909309	unknown
357_1	357	Un	48366565	48391571	25007	Un	13015035	13040041	unknown
358_1	358	Un	48392572	48417944	25373	Un	12910036	12935408	unknown
359_1	359	Un	48418945	48443627	24683	Un	13041042	13065724	unknown
360_1	360	Un	48444628	48493591	48964	Un	10666700	10715663	unknown
361_1	361	Un	48494592	48519062	24471	Un	13066725	13091195	unknown
362_1	362	Un	48520063	48544425	24363	Un	13092196	13116558	unknown
363_1	363	Un	48545426	48569683	24258	Un	13117559	13141816	unknown
364_1	364	Un	48570684	48594856	24173	Un	13218456	13242628	unknown
365_1	365	Un	48595857	48620102	24246	Un	13142817	13167062	unknown
366_1	366	Un	48621103	48645139	24037	Un	13243629	13267665	unknown
367_1	367	Un	48646140	48670135	23996	Un	13293666	13317661	unknown
368_1	368	Un	48671136	48714869	43734	Un	11001878	11045611	unknown
369_1	369	Un	48715870	48740052	24183	Un	13193273	13217455	unknown
370_1	370	Un	48741053	48764711	23659	Un	13368531	13392189	unknown
371_1	371	Un	48765712	48789921	24210	Un	13168063	13192272	unknown
372_1	372	Un	48790922	48814886	23965	Un	13318662	13342626	unknown
373_1	373	Un	48815887	48839348	23462	Un	13466822	13490283	unknown
374_1	374	Un	48840349	48863555	23207	Un	13491284	13514490	unknown
375_1	375	Un	48864556	48887747	23192	Un	13539692	13562883	unknown
376_1	376	Un	48888748	48912651	23904	Un	13343627	13367530	unknown
377_1	377	Un	48913652	48939743	26092	Un	12829899	12855990	unknown
378_1	378	Un	48940744	48964743	24000	Un	13268666	13292665	unknown
379_1	379	Un	48965744	48989315	23572	Un	13393190	13416761	unknown
380_1	380	Un	48990316	49013826	23511	Un	13442311	13465821	unknown
381_1	381	Un	49014827	49037708	22882	Un	13563884	13586765	unknown
382_1	382	Un	49038709	49063862	25154	Un	12962764	12987917	unknown
383_1	383	Un	49064863	49088063	23201	Un	13515491	13538691	unknown
384_1	384	Un	49089064	49111678	22615	Un	13635121	13657735	unknown
385_1	385	Un	49112679	49135318	22640	Un	13611481	13634120	unknown
386_1	386	Un	49136319	49158781	22463	Un	13705940	13728402	unknown
387_1	387	Un	49159782	49207533	47752	Un	10766601	10814352	unknown
388_1	388	Un	49208534	49231248	22715	Un	13587766	13610480	unknown
389_1	389	Un	49232249	49254848	22600	Un	13682340	13704939	unknown
390_1	390	Un	49255849	49277817	21969	Un	13822142	13844110	unknown
391_1	391	Un	49278818	49300531	21714	Un	13890682	13912395	unknown
392_1	392	Un	49301532	49323283	21752	Un	13867930	13889681	unknown
393_1	393	Un	49324284	49345924	21641	Un	13936039	13957679	unknown
394_1	394	Un	49346925	49372501	25577	Un	12856991	12882567	unknown
395_1	395	Un	49373502	49395098	21597	Un	13958680	13980276	unknown
396_1	396	Un	49396099	49418099	22001	Un	13799141	13821141	unknown
397_1	397	Un	49419100	49440577	21478	Un	13981277	14002754	unknown
398_1	398	Un	49441578	49466932	25355	Un	12936409	12961763	unknown
399_1	399	Un	49467933	49489183	21251	Un	14093494	14114744	unknown
400_1	400	Un	49490184	49511558	21375	Un	14071119	14092493	unknown
401_1	401	Un	49512559	49536107	23549	Un	13417762	13441310	unknown
402_1	402	Un	49537108	49558127	21020	Un	14137957	14158976	unknown
403_1	403	Un	49559128	49580056	20929	Un	14203920	14224848	unknown
404_1	404	Un	49581057	49601996	20940	Un	14181980	14202919	unknown
405_1	405	Un	49602997	49623832	20836	Un	14269559	14290394	unknown
406_1	406	Un	49624833	49647167	22335	Un	13752777	13775111	unknown
407_1	407	Un	49648168	49669379	21212	Un	14115745	14136956	unknown
408_1	408	Un	49670380	49691234	20855	Un	14225849	14246703	unknown
409_1	409	Un	49692235	49713660	21426	Un	14048693	14070118	unknown
410_1	410	Un	49714661	49735663	21003	Un	14159977	14180979	unknown
411_1	411	Un	49736664	49758306	21643	Un	13913396	13935038	unknown
412_1	412	Un	49759307	49780773	21467	Un	14026226	14047692	unknown
413_1	413	Un	49781774	49802315	20542	Un	14313008	14333549	unknown
414_1	414	Un	49803316	49824786	21471	Un	14003755	14025225	unknown
415_1	415	Un	49825787	49846174	20388	Un	14334550	14354937	unknown
416_1	416	Un	49847175	49867524	20350	Un	14355938	14376287	unknown
417_1	417	Un	49868525	49888818	20294	Un	14377288	14397581	unknown
418_1	418	Un	49889819	49910082	20264	Un	14398582	14418845	unknown
419_1	419	Un	49911083	49931290	20208	Un	14419846	14440053	unknown
420_1	420	Un	49932291	49954664	22374	Un	13729403	13751776	unknown
421_1	421	Un	49955665	49975657	19993	Un	14462090	14482082	unknown
422_1	422	Un	49976658	49997270	20613	Un	14291395	14312007	unknown
423_1	423	Un	49998271	50018017	19747	Un	14503921	14523667	unknown
424_1	424	Un	50019018	50038855	19838	Un	14483083	14502920	unknown
425_1	425	Un	50039856	50061674	21819	Un	13845111	13866929	unknown
426_1	426	Un	50062675	50082394	19720	Un	14545401	14565120	unknown
427_1	427	Un	50083395	50103044	19650	Un	14566121	14585770	unknown
428_1	428	Un	50104045	50124899	20855	Un	14247704	14268558	unknown
429_1	429	Un	50125900	50145449	19550	Un	14586771	14606320	unknown
430_1	430	Un	50146450	50166182	19733	Un	14524668	14544400	unknown
431_1	431	Un	50167183	50187218	20036	Un	14441054	14461089	unknown
432_1	432	Un	50188219	50207622	19404	Un	14627804	14647207	unknown
433_1	433	Un	50208623	50230651	22029	Un	13776112	13798140	unknown
434_1	434	Un	50231652	50250816	19165	Un	14648208	14667372	unknown
435_1	435	Un	50251817	50270894	19078	Un	14668373	14687450	unknown
436_1	436	Un	50271895	50290710	18816	Un	14688451	14707266	unknown
437_1	437	Un	50291711	50311193	19483	Un	14607321	14626803	unknown
438_1	438	Un	50312194	50330894	18701	Un	14747780	14766480	unknown
439_1	439	Un	50331895	50354498	22604	Un	13658736	13681339	unknown
440_1	440	Un	50355499	50373966	18468	Un	14787014	14805481	unknown
441_1	441	Un	50374967	50393397	18431	Un	14806482	14824912	unknown
442_1	442	Un	50394398	50412766	18369	Un	14845321	14863689	unknown
443_1	443	Un	50413767	50431847	18081	Un	14922034	14940114	unknown
444_1	444	Un	50432848	50450966	18119	Un	14864690	14882808	unknown
445_1	445	Un	50451967	50469945	17979	Un	15017189	15035167	unknown
446_1	446	Un	50470946	50488940	17995	Un	14979209	14997203	unknown
448_1	448	Un	50489941	50508054	18114	Un	14883809	14901922	unknown
449_1	449	Un	50509055	50561190	52136	Un	10143966	10196101	unknown
450_1	450	Un	50562191	50579883	17693	Un	15092573	15110265	unknown
451_1	451	Un	50580884	50599416	18533	Un	14767481	14786013	unknown
452_1	452	Un	50600417	50619163	18747	Un	14728033	14746779	unknown
453_1	453	Un	50620164	50637765	17602	Un	15129930	15147531	unknown
454_1	454	Un	50638766	50656179	17414	Un	15222583	15239996	unknown
455_1	455	Un	50657180	50674591	17412	Un	15240997	15258408	unknown
456_1	456	Un	50675592	50692994	17403	Un	15259409	15276811	unknown
457_1	457	Un	50693995	50712402	18408	Un	14825913	14844320	unknown
458_1	458	Un	50713403	50730911	17509	Un	15167064	15184572	unknown
459_1	459	Un	50731912	50749281	17370	Un	15296214	15313583	unknown
460_1	460	Un	50750282	50767622	17341	Un	15314584	15331924	unknown
461_1	461	Un	50768623	50786286	17664	Un	15111266	15128929	unknown
462_1	462	Un	50787287	50805089	17803	Un	15055039	15072841	unknown
463_1	463	Un	50806090	50823405	17316	Un	15369597	15386912	unknown
464_1	464	Un	50824406	50841910	17505	Un	15185573	15203077	unknown
465_1	465	Un	50842911	50860312	17402	Un	15277812	15295213	unknown
466_1	466	Un	50861313	50879423	18111	Un	14902923	14921033	unknown
467_1	467	Un	50880424	50898408	17985	Un	14998204	15016188	unknown
468_1	468	Un	50899409	50916489	17081	Un	15424172	15441252	unknown
469_1	469	Un	50917490	50934544	17055	Un	15442253	15459307	unknown
470_1	470	Un	50935545	50952590	17046	Un	15460308	15477353	unknown
471_1	471	Un	50953591	50971611	18021	Un	14960188	14978208	unknown
472_1	472	Un	50972612	50989710	17099	Un	15406073	15423171	unknown
473_1	473	Un	50990711	51007659	16949	Un	15514343	15531291	unknown
474_1	474	Un	51008660	51025995	17336	Un	15332925	15350260	unknown
475_1	475	Un	51026996	51043724	16729	Un	15603510	15620238	unknown
476_1	476	Un	51044725	51096586	51862	Un	10250001	10301862	unknown
477_1	477	Un	51097587	51114256	16670	Un	15638918	15655587	unknown
478_1	478	Un	51115257	51132144	16888	Un	15532292	15549179	unknown
479_1	479	Un	51133145	51149723	16579	Un	15656588	15673166	unknown
480_1	480	Un	51150724	51168796	18073	Un	14941115	14959187	unknown
481_1	481	Un	51169797	51187527	17731	Un	15073842	15091572	unknown
482_1	482	Un	51188528	51204986	16459	Un	15761782	15778240	unknown
483_1	483	Un	51205987	51222470	16484	Un	15744298	15760781	unknown
484_1	484	Un	51223471	51239816	16346	Un	15779241	15795586	unknown
485_1	485	Un	51240817	51257561	16745	Un	15585765	15602509	unknown
486_1	486	Un	51258562	51274863	16302	Un	15831246	15847547	unknown
487_1	487	Un	51275864	51292828	16965	Un	15496378	15513342	unknown
488_1	488	Un	51293829	51311333	17505	Un	15204078	15221582	unknown
489_1	489	Un	51312334	51328667	16334	Un	15796587	15812920	unknown
490_1	490	Un	51329668	51345992	16325	Un	15813921	15830245	unknown
491_1	491	Un	51346993	51363789	16797	Un	15550180	15566976	unknown
492_1	492	Un	51364790	51381274	16485	Un	15726813	15743297	unknown
493_1	493	Un	51382275	51398457	16183	Un	15882974	15899156	unknown
494_1	494	Un	51399458	51416016	16559	Un	15691743	15708301	unknown
495_1	495	Un	51417017	51433234	16218	Un	15848548	15864765	unknown
496_1	496	Un	51434235	51450745	16511	Un	15709302	15725812	unknown
497_1	497	Un	51451746	51467660	15915	Un	15951090	15967004	unknown
498_1	498	Un	51468661	51484652	15992	Un	15917177	15933168	unknown
499_1	499	Un	51485653	51501438	15786	Un	16035461	16051246	unknown
500_1	500	Un	51502439	51518185	15747	Un	16068996	16084742	unknown
501_1	501	Un	51519186	51536345	17160	Un	15387913	15405072	unknown
502_1	502	Un	51537346	51553076	15731	Un	16085743	16101473	unknown
503_1	503	Un	51554077	51569727	15651	Un	16135921	16151571	unknown
504_1	504	Un	51570728	51586325	15598	Un	16185838	16201435	unknown
505_1	505	Un	51587326	51604349	17024	Un	15478354	15495377	unknown
506_1	506	Un	51605350	51620921	15572	Un	16202436	16218007	unknown
507_1	507	Un	51621922	51637670	15749	Un	16052247	16067995	unknown
508_1	508	Un	51638671	51654186	15516	Un	16219008	16234523	unknown
509_1	509	Un	51655187	51671091	15905	Un	15968005	15983909	unknown
510_1	510	Un	51672092	51687523	15432	Un	16252023	16267454	unknown
511_1	511	Un	51688524	51705859	17336	Un	15351261	15368596	unknown
512_1	512	Un	51706860	51722879	16020	Un	15900157	15916176	unknown
513_1	513	Un	51723880	51740558	16679	Un	15621239	15637917	unknown
514_1	514	Un	51741559	51757479	15921	Un	15934169	15950089	unknown
515_1	515	Un	51758480	51774210	15731	Un	16102474	16118204	unknown
516_1	516	Un	51775211	51790509	15299	Un	16301202	16316500	unknown
517_1	517	Un	51791510	51806797	15288	Un	16350090	16365377	unknown
518_1	518	Un	51807798	51823067	15270	Un	16382653	16397922	unknown
519_1	519	Un	51824068	51839908	15841	Un	16001800	16017640	unknown
520_1	520	Un	51840909	51856407	15499	Un	16235524	16251022	unknown
521_1	521	Un	51857408	51872569	15162	Un	16398923	16414084	unknown
522_1	522	Un	51873570	51889777	16208	Un	15865766	15881973	unknown
523_1	523	Un	51890778	51905861	15084	Un	16463399	16478482	unknown
524_1	524	Un	51906862	51921932	15071	Un	16479483	16494553	unknown
525_1	525	Un	51922933	51938362	15430	Un	16268455	16283884	unknown
526_1	526	Un	51939363	51954994	15632	Un	16169206	16184837	unknown
527_1	527	Un	51955995	51971290	15296	Un	16317501	16332796	unknown
528_1	528	Un	51972291	51987382	15092	Un	16447307	16462398	unknown
529_1	529	Un	51988383	52003350	14968	Un	16511577	16526544	unknown
530_1	530	Un	52004351	52019314	14964	Un	16527545	16542508	unknown
531_1	531	Un	52020315	52035433	15119	Un	16415085	16430203	unknown
532_1	532	Un	52036434	52051726	15293	Un	16333797	16349089	unknown
533_1	533	Un	52052727	52067637	14911	Un	16575405	16590315	unknown
534_1	534	Un	52068638	52083571	14934	Un	16559471	16574404	unknown
535_1	535	Un	52084572	52099888	15317	Un	16284885	16300201	unknown
536_1	536	Un	52100889	52116163	15275	Un	16366378	16381652	unknown
537_1	537	Un	52117164	52132186	15023	Un	16495554	16510576	unknown
538_1	538	Un	52133187	52147959	14773	Un	16622905	16637677	unknown
539_1	539	Un	52148960	52164779	15820	Un	16018641	16034460	unknown
540_1	540	Un	52165780	52180529	14750	Un	16654439	16669188	unknown
541_1	541	Un	52181530	52200295	18766	Un	14708267	14727032	unknown
542_1	542	Un	52201296	52216041	14746	Un	16670189	16684934	unknown
543_1	543	Un	52217042	52233617	16576	Un	15674167	15690742	unknown
544_1	544	Un	52234618	52249579	14962	Un	16543509	16558470	unknown
545_1	545	Un	52250580	52265215	14636	Un	16717350	16731985	unknown
546_1	546	Un	52266216	52280824	14609	Un	16732986	16747594	unknown
547_1	547	Un	52281825	52296368	14544	Un	16795291	16809834	unknown
548_1	548	Un	52297369	52311739	14371	Un	16826278	16840648	unknown
549_1	549	Un	52312740	52327470	14731	Un	16685935	16700665	unknown
550_1	550	Un	52328471	52342789	14319	Un	16872334	16886652	unknown
551_1	551	Un	52343790	52359423	15634	Un	16152572	16168205	unknown
552_1	552	Un	52360424	52374980	14557	Un	16764179	16778735	unknown
553_1	553	Un	52375981	52390772	14792	Un	16607113	16621904	unknown
554_1	554	Un	52391773	52406081	14309	Un	16887653	16901961	unknown
555_1	555	Un	52407082	52421442	14361	Un	16841649	16856009	unknown
556_1	556	Un	52422443	52436455	14013	Un	16948398	16962410	unknown
557_1	557	Un	52437456	52482687	45232	Un	10910310	10955541	unknown
558_1	558	Un	52483688	52498011	14324	Un	16857010	16871333	unknown
559_1	559	Un	52499012	52513129	14118	Un	16918257	16932374	unknown
560_1	560	Un	52514130	52528076	13947	Un	16978373	16992319	unknown
561_1	561	Un	52529077	52542992	13916	Un	17008254	17022169	unknown
562_1	562	Un	52543993	52561524	17532	Un	15148532	15166063	unknown
563_1	563	Un	52562525	52576412	13888	Un	17023170	17037057	unknown
564_1	564	Un	52577413	52591281	13869	Un	17052934	17066802	unknown
565_1	565	Un	52592282	52606865	14584	Un	16748595	16763178	unknown
566_1	566	Un	52607866	52621888	14023	Un	16933375	16947397	unknown
567_1	567	Un	52622889	52636850	13962	Un	16963411	16977372	unknown
568_1	568	Un	52637851	52652611	14761	Un	16638678	16653438	unknown
569_1	569	Un	52653612	52667314	13703	Un	17082535	17096237	unknown
570_1	570	Un	52668315	52682014	13700	Un	17097238	17110937	unknown
571_1	571	Un	52683015	52696704	13690	Un	17111938	17125627	unknown
572_1	572	Un	52697705	52711383	13679	Un	17141308	17154986	unknown
573_1	573	Un	52712384	52728099	15716	Un	16119205	16134920	unknown
574_1	574	Un	52729100	52743896	14797	Un	16591316	16606112	unknown
575_1	575	Un	52744897	52758482	13586	Un	17155987	17169572	unknown
576_1	576	Un	52759483	52773065	13583	Un	17185159	17198741	unknown
577_1	577	Un	52774066	52788508	14443	Un	16810835	16825277	unknown
578_1	578	Un	52789509	52803384	13876	Un	17038058	17051933	unknown
579_1	579	Un	52804385	52821172	16788	Un	15567977	15584764	unknown
580_1	580	Un	52822173	52835588	13416	Un	17228750	17242165	unknown
581_1	581	Un	52836589	52849992	13404	Un	17243166	17256569	unknown
582_1	582	Un	52850993	52864390	13398	Un	17271974	17285371	unknown
583_1	583	Un	52865391	52878781	13391	Un	17286372	17299762	unknown
584_1	584	Un	52879782	52893461	13680	Un	17126628	17140307	unknown
585_1	585	Un	52894462	52907829	13368	Un	17329537	17342904	unknown
586_1	586	Un	52908830	52922190	13361	Un	17343905	17357265	unknown
587_1	587	Un	52923191	52936646	13456	Un	17214294	17227749	unknown
588_1	588	Un	52937647	52951378	13732	Un	17067803	17081534	unknown
589_1	589	Un	52952379	52965717	13339	Un	17372625	17385963	unknown
590_1	590	Un	52966718	52980043	13326	Un	17401296	17414621	unknown
591_1	591	Un	52981044	52994344	13301	Un	17415622	17428922	unknown
592_1	592	Un	52995345	53008593	13249	Un	17444195	17457443	unknown
593_1	593	Un	53009594	53022925	13332	Un	17386964	17400295	unknown
594_1	594	Un	53023926	53037138	13213	Un	17472666	17485878	unknown
595_1	595	Un	53038139	53051346	13208	Un	17486879	17500086	unknown
596_1	596	Un	53052347	53065542	13196	Un	17501087	17514282	unknown
597_1	597	Un	53066543	53079611	13069	Un	17557693	17570761	unknown
598_1	598	Un	53080612	53093666	13055	Un	17571762	17584816	unknown
599_1	599	Un	53094667	53107818	13152	Un	17515283	17528434	unknown
600_1	600	Un	53108819	53121857	13039	Un	17585817	17598855	unknown
601_1	601	Un	53122858	53135889	13032	Un	17599856	17612887	unknown
602_1	602	Un	53136890	53150823	13934	Un	16993320	17007253	unknown
603_1	603	Un	53151824	53164805	12982	Un	17627888	17640869	unknown
604_1	604	Un	53165806	53178953	13148	Un	17529435	17542582	unknown
605_1	605	Un	53179954	53193336	13383	Un	17315154	17328536	unknown
606_1	606	Un	53194337	53207297	12961	Un	17641870	17654830	unknown
607_1	607	Un	53208298	53222852	14555	Un	16779736	16794290	unknown
608_1	608	Un	53223853	53236791	12939	Un	17655831	17668769	unknown
609_1	609	Un	53237792	53250716	12925	Un	17669770	17682694	unknown
610_1	610	Un	53251717	53264613	12897	Un	17697613	17710509	unknown
611_1	611	Un	53265614	53278503	12890	Un	17711510	17724399	unknown
612_1	612	Un	53279504	53292362	12859	Un	17725400	17738258	unknown
613_1	613	Un	53293363	53306362	13000	Un	17613888	17626887	unknown
614_1	614	Un	53307363	53320159	12797	Un	17739259	17752055	unknown
615_1	615	Un	53321160	53333933	12774	Un	17766835	17779608	unknown
616_1	616	Un	53334934	53348155	13222	Un	17458444	17471665	unknown
617_1	617	Un	53349156	53361879	12724	Un	17794377	17807100	unknown
618_1	618	Un	53362880	53377982	15103	Un	16431204	16446306	unknown
619_1	619	Un	53378983	53394872	15890	Un	15984910	16000799	unknown
620_1	620	Un	53395873	53408554	12682	Un	17808101	17820782	unknown
621_1	621	Un	53409555	53422235	12681	Un	17821783	17834463	unknown
622_1	622	Un	53423236	53435913	12678	Un	17835464	17848141	unknown
623_1	623	Un	53436914	53449681	12768	Un	17780609	17793376	unknown
624_1	624	Un	53450682	53463340	12659	Un	17849142	17861800	unknown
625_1	625	Un	53464341	53476958	12618	Un	17876444	17889061	unknown
626_1	626	Un	53477959	53490876	12918	Un	17683695	17696612	unknown
627_1	627	Un	53491877	53504455	12579	Un	17890062	17902640	unknown
628_1	628	Un	53505456	53520139	14684	Un	16701666	16716349	unknown
629_1	629	Un	53521140	53533678	12539	Un	17917186	17929724	unknown
630_1	630	Un	53534679	53547210	12532	Un	17944261	17956792	unknown
631_1	631	Un	53548211	53560746	12536	Un	17930725	17943260	unknown
632_1	632	Un	53561747	53574175	12429	Un	17998161	18010589	unknown
633_1	633	Un	53575176	53587586	12411	Un	18011590	18024000	unknown
634_1	634	Un	53588587	53600988	12402	Un	18038411	18050812	unknown
635_1	635	Un	53601989	53614377	12389	Un	18051813	18064201	unknown
636_1	636	Un	53615378	53627729	12352	Un	18078558	18090909	unknown
637_1	637	Un	53628730	53641078	12349	Un	18091910	18104258	unknown
638_1	638	Un	53642079	53654405	12327	Un	18105259	18117585	unknown
639_1	639	Un	53655406	53667722	12317	Un	18118586	18130902	unknown
640_1	640	Un	53668723	53682081	13359	Un	17358266	17371624	unknown
641_1	641	Un	53683082	53695394	12313	Un	18131903	18144215	unknown
642_1	642	Un	53696395	53708682	12288	Un	18145216	18157503	unknown
643_1	643	Un	53709683	53722120	12438	Un	17984723	17997160	unknown
644_1	644	Un	53723121	53735476	12356	Un	18065202	18077557	unknown
645_1	645	Un	53736477	53748938	12462	Un	17971261	17983722	unknown
646_1	646	Un	53749939	53762165	12227	Un	18185026	18197252	unknown
647_1	647	Un	53763166	53775390	12225	Un	18198253	18210477	unknown
648_1	648	Un	53776391	53788592	12202	Un	18211478	18223679	unknown
649_1	649	Un	53789593	53801743	12151	Un	18264206	18276356	unknown
650_1	650	Un	53802744	53816329	13586	Un	17170573	17184158	unknown
651_1	651	Un	53817330	53829462	12133	Un	18290499	18302631	unknown
652_1	652	Un	53830463	53842872	12410	Un	18025001	18037410	unknown
653_1	653	Un	53843873	53855988	12116	Un	18303632	18315747	unknown
654_1	654	Un	53856989	53869176	12188	Un	18224680	18236867	unknown
655_1	655	Un	53870177	53882261	12085	Un	18329853	18341937	unknown
656_1	656	Un	53883262	53895331	12070	Un	18342938	18355007	unknown
657_1	657	Un	53896332	53908396	12065	Un	18356008	18368072	unknown
658_1	658	Un	53909397	53921448	12052	Un	18369073	18381124	unknown
659_1	659	Un	53922449	53934590	12142	Un	18277357	18289498	unknown
660_1	660	Un	53935591	53948233	12643	Un	17862801	17875443	unknown
661_1	661	Un	53949234	53961261	12028	Un	18382125	18394152	unknown
662_1	662	Un	53962262	53974280	12019	Un	18395153	18407171	unknown
663_1	663	Un	53975281	53987297	12017	Un	18408172	18420188	unknown
664_1	664	Un	53988298	54001569	13272	Un	17429923	17443194	unknown
665_1	665	Un	54002570	54014826	12257	Un	18171769	18184025	unknown
666_1	666	Un	54015827	54027747	11921	Un	18460008	18471928	unknown
667_1	667	Un	54028748	54042151	13404	Un	17257570	17270973	unknown
668_1	668	Un	54043152	54054914	11763	Un	18472929	18484691	unknown
669_1	669	Un	54055915	54068179	12265	Un	18158504	18170768	unknown
670_1	670	Un	54069180	54080901	11722	Un	18485692	18497413	unknown
671_1	671	Un	54081902	54093584	11683	Un	18536495	18548177	unknown
672_1	672	Un	54094585	54134188	39604	Un	11514762	11554365	unknown
673_1	673	Un	54135189	54146848	11660	Un	18561858	18573517	unknown
674_1	674	Un	54147849	54159487	11639	Un	18574518	18586156	unknown
675_1	675	Un	54160488	54172118	11631	Un	18587157	18598787	unknown
677_1	677	Un	54173119	54184744	11626	Un	18612417	18624042	unknown
678_1	678	Un	54185745	54197367	11623	Un	18625043	18636665	unknown
679_1	679	Un	54198368	54209989	11622	Un	18637666	18649287	unknown
680_1	680	Un	54210990	54222567	11578	Un	18662894	18674471	unknown
681_1	681	Un	54223568	54235116	11549	Un	18688041	18699589	unknown
682_1	682	Un	54236117	54248584	12468	Un	17957793	17970260	unknown
683_1	683	Un	54249585	54261089	11505	Un	18700590	18712094	unknown
684_1	684	Un	54262090	54274021	11932	Un	18434153	18446084	unknown
685_1	685	Un	54275022	54287195	12174	Un	18237868	18250041	unknown
686_1	686	Un	54288196	54299875	11680	Un	18549178	18560857	unknown
687_1	687	Un	54300876	54312444	11569	Un	18675472	18687040	unknown
688_1	688	Un	54313445	54324890	11446	Un	18725600	18737045	unknown
689_1	689	Un	54325891	54337328	11438	Un	18738046	18749483	unknown
690_1	690	Un	54338329	54349688	11360	Un	18775285	18786644	unknown
691_1	691	Un	54350689	54362032	11344	Un	18787645	18798988	unknown
692_1	692	Un	54363033	54374729	11697	Un	18511112	18522808	unknown
693_1	693	Un	54375730	54387234	11505	Un	18713095	18724599	unknown
694_1	694	Un	54388235	54399541	11307	Un	18799989	18811295	unknown
695_1	695	Un	54400542	54411831	11290	Un	18812296	18823585	unknown
696_1	696	Un	54412832	54424235	11404	Un	18750484	18761887	unknown
697_1	697	Un	54425236	54436497	11262	Un	18824586	18835847	unknown
698_1	698	Un	54437498	54451049	13552	Un	17199742	17213293	unknown
699_1	699	Un	54452050	54463296	11247	Un	18861359	18872605	unknown
700_1	700	Un	54464297	54476219	11923	Un	18447085	18459007	unknown
701_1	701	Un	54477220	54488825	11606	Un	18650288	18661893	unknown
702_1	702	Un	54489826	54501085	11260	Un	18836848	18848107	unknown
703_1	703	Un	54502086	54514049	11964	Un	18421189	18433152	unknown
704_1	704	Un	54515050	54526194	11145	Un	18898070	18909214	unknown
705_1	705	Un	54527195	54538259	11065	Un	18958644	18969708	unknown
706_1	706	Un	54539260	54550393	11134	Un	18910215	18921348	unknown
707_1	707	Un	54551394	54562409	11016	Un	18970709	18981724	unknown
708_1	708	Un	54563410	54574413	11004	Un	18982725	18993728	unknown
709_1	709	Un	54575414	54586414	11001	Un	18994729	19005729	unknown
710_1	710	Un	54587415	54598399	10985	Un	19006730	19017714	unknown
711_1	711	Un	54599400	54610381	10982	Un	19030700	19041681	unknown
712_1	712	Un	54611382	54622352	10971	Un	19054658	19065628	unknown
713_1	713	Un	54623353	54634314	10962	Un	19078595	19089556	unknown
714_1	714	Un	54635315	54646276	10962	Un	19090557	19101518	unknown
715_1	715	Un	54647277	54658231	10955	Un	19102519	19113473	unknown
716_1	716	Un	54659232	54670165	10934	Un	19126422	19137355	unknown
717_1	717	Un	54671166	54682090	10925	Un	19138356	19149280	unknown
718_1	718	Un	54683091	54694002	10912	Un	19174114	19185025	unknown
719_1	719	Un	54695003	54705978	10976	Un	19042682	19053657	unknown
720_1	720	Un	54706979	54717842	10864	Un	19197932	19208795	unknown
721_1	721	Un	54718843	54729686	10844	Un	19221641	19232484	unknown
722_1	722	Un	54730687	54741523	10837	Un	19233485	19244321	unknown
723_1	723	Un	54742524	54753348	10825	Un	19245322	19256146	unknown
724_1	724	Un	54754349	54765266	10918	Un	19150281	19161198	unknown
725_1	725	Un	54766267	54777037	10771	Un	19292544	19303314	unknown
726_1	726	Un	54778038	54788800	10763	Un	19304315	19315077	unknown
727_1	727	Un	54789801	54800560	10760	Un	19316078	19326837	unknown
728_1	728	Un	54801561	54812405	10845	Un	19209796	19220640	unknown
729_1	729	Un	54813406	54824116	10711	Un	19339578	19350288	unknown
730_1	730	Un	54825117	54835821	10705	Un	19351289	19361993	unknown
731_1	731	Un	54836822	54847787	10966	Un	19066629	19077594	unknown
732_1	732	Un	54848788	54859473	10686	Un	19362994	19373679	unknown
733_1	733	Un	54860474	54871245	10772	Un	19280772	19291543	unknown
734_1	734	Un	54872246	54883943	11698	Un	18498414	18510111	unknown
735_1	735	Un	54884944	54895928	10985	Un	19018715	19029699	unknown
736_1	736	Un	54896929	54907560	10632	Un	19398006	19408637	unknown
737_1	737	Un	54908561	54919177	10617	Un	19421268	19431884	unknown
738_1	738	Un	54920178	54934472	14295	Un	16902962	16917256	unknown
739_1	739	Un	54935473	54946056	10584	Un	19444500	19455083	unknown
740_1	740	Un	54947057	54957634	10578	Un	19456084	19466661	unknown
741_1	741	Un	54958635	54969306	10672	Un	19374680	19385351	unknown
742_1	742	Un	54970307	54980780	10474	Un	19502193	19512666	unknown
743_1	743	Un	54981781	54992695	10915	Un	19162199	19173113	unknown
744_1	744	Un	54993696	55004166	10471	Un	19513667	19524137	unknown
745_1	745	Un	55005167	55015604	10438	Un	19525138	19535575	unknown
746_1	746	Un	55016605	55027038	10434	Un	19536576	19547009	unknown
747_1	747	Un	55028039	55038431	10393	Un	19548010	19558402	unknown
748_1	748	Un	55039432	55049815	10384	Un	19559403	19569786	unknown
749_1	749	Un	55050816	55061334	10519	Un	19479186	19489704	unknown
750_1	750	Un	55062335	55072676	10342	Un	19582148	19592489	unknown
751_1	751	Un	55073677	55084012	10336	Un	19593490	19603825	unknown
752_1	752	Un	55085013	55096098	11086	Un	18934480	18945565	unknown
753_1	753	Un	55097099	55107402	10304	Un	19604826	19615129	unknown
754_1	754	Un	55108403	55118702	10300	Un	19616130	19626429	unknown
755_1	755	Un	55119703	55130190	10488	Un	19490705	19501192	unknown
756_1	756	Un	55131191	55141437	10247	Un	19638684	19648930	unknown
757_1	757	Un	55142438	55152645	10208	Un	19649931	19660138	unknown
758_1	758	Un	55153646	55163846	10201	Un	19661139	19671339	unknown
759_1	759	Un	55164847	55175033	10187	Un	19683535	19693721	unknown
760_1	760	Un	55176034	55186183	10150	Un	19705908	19716057	unknown
761_1	761	Un	55187184	55197327	10144	Un	19717058	19727201	unknown
762_1	762	Un	55198328	55208455	10128	Un	19739335	19749462	unknown
763_1	763	Un	55209456	55219560	10105	Un	19772699	19782803	unknown
764_1	764	Un	55220561	55230649	10089	Un	19783804	19793892	unknown
765_1	765	Un	55231650	55241719	10070	Un	19794893	19804962	unknown
766_1	766	Un	55242720	55252781	10062	Un	19805963	19816024	unknown
767_1	767	Un	55253782	55263835	10054	Un	19817025	19827078	unknown
768_1	768	Un	55264836	55274873	10038	Un	19850177	19860214	unknown
769_1	769	Un	55275874	55285902	10029	Un	19861215	19871243	unknown
770_1	770	Un	55286903	55296931	10029	Un	19872244	19882272	unknown
771_1	771	Un	55297932	55310710	12779	Un	17753056	17765834	unknown
772_1	772	Un	55311711	55321719	10009	Un	19883273	19893281	unknown
773_1	773	Un	55322720	55332973	10254	Un	19627430	19637683	unknown
774_1	774	Un	55333974	55343960	9987	Un	19905281	19915267	unknown
775_1	775	Un	55344961	55354936	9976	Un	19927252	19937227	unknown
776_1	776	Un	55355937	55366069	10133	Un	19728202	19738334	unknown
777_1	777	Un	55367070	55377122	10053	Un	19828079	19838131	unknown
778_1	778	Un	55378123	55388045	9923	Un	19982018	19991940	unknown
779_1	779	Un	55389046	55402436	13391	Un	17300763	17314153	unknown
780_1	780	Un	55403437	55415981	12545	Un	17903641	17916185	unknown
781_1	781	Un	55416982	55426942	9961	Un	19938228	19948188	unknown
782_1	782	Un	55427943	55437783	9841	Un	20003834	20013674	unknown
783_1	783	Un	55438784	55448720	9937	Un	19960146	19970082	unknown
784_1	784	Un	55449721	55459534	9814	Un	20025515	20035328	unknown
785_1	785	Un	55460535	55470339	9805	Un	20036329	20046133	unknown
786_1	786	Un	55471340	55481338	9999	Un	19894282	19904280	unknown
787_1	787	Un	55482339	55493469	11131	Un	18922349	18933479	unknown
788_1	788	Un	55494470	55505084	10615	Un	19432885	19443499	unknown
789_1	789	Un	55506085	55516201	10117	Un	19761582	19771698	unknown
790_1	790	Un	55517202	55526951	9750	Un	20047134	20056883	unknown
791_1	791	Un	55527952	55537935	9984	Un	19916268	19926251	unknown
792_1	792	Un	55538936	55549130	10195	Un	19672340	19682534	unknown
793_1	793	Un	55550131	55559845	9715	Un	20057884	20067598	unknown
794_1	794	Un	55560846	55570560	9715	Un	20068599	20078313	unknown
795_1	795	Un	55571561	55582638	11078	Un	18946566	18957643	unknown
796_1	796	Un	55583639	55594378	10740	Un	19327838	19338577	unknown
797_1	797	Un	55595379	55605037	9659	Un	20079314	20088972	unknown
798_1	798	Un	55606038	55615677	9640	Un	20100630	20110269	unknown
799_1	799	Un	55616678	55627201	10524	Un	19467662	19478185	unknown
800_1	800	Un	55628202	55637840	9639	Un	20111270	20120908	unknown
801_1	801	Un	55638841	55648478	9638	Un	20121909	20131546	unknown
802_1	802	Un	55649479	55659413	9935	Un	19971083	19981017	unknown
803_1	803	Un	55660414	55670025	9612	Un	20132547	20142158	unknown
804_1	804	Un	55671026	55680628	9603	Un	20143159	20152761	unknown
805_1	805	Un	55681629	55691215	9587	Un	20153762	20163348	unknown
806_1	806	Un	55692216	55701794	9579	Un	20164349	20173927	unknown
807_1	807	Un	55702795	55714958	12164	Un	18251042	18263205	unknown
808_1	808	Un	55715959	55759220	43262	Un	11090963	11134224	unknown
809_1	809	Un	55760221	55771457	11237	Un	18873606	18884842	unknown
810_1	810	Un	55772458	55782007	9550	Un	20174928	20184477	unknown
811_1	811	Un	55783008	55793637	10630	Un	19409638	19420267	unknown
812_1	812	Un	55794638	55804183	9546	Un	20185478	20195023	unknown
813_1	813	Un	55805184	55815023	9840	Un	20014675	20024514	unknown
814_1	814	Un	55816024	55825525	9502	Un	20206550	20216051	unknown
815_1	815	Un	55826526	55836886	10361	Un	19570787	19581147	unknown
816_1	816	Un	55837887	55848834	10948	Un	19114474	19125421	unknown
817_1	817	Un	55849835	55859315	9481	Un	20217052	20226532	unknown
818_1	818	Un	55860316	55871542	11227	Un	18885843	18897069	unknown
819_1	819	Un	55872543	55882010	9468	Un	20227533	20237000	unknown
820_1	820	Un	55883011	55892465	9455	Un	20238001	20247455	unknown
821_1	821	Un	55893466	55902919	9454	Un	20248456	20257909	unknown
822_1	822	Un	55903920	55913364	9445	Un	20258910	20268354	unknown
823_1	823	Un	55914365	55923805	9441	Un	20269355	20278795	unknown
824_1	824	Un	55924806	55934762	9957	Un	19949189	19959145	unknown
825_1	825	Un	55935763	55945187	9425	Un	20279796	20289220	unknown
826_1	826	Un	55946188	55955587	9400	Un	20290221	20299620	unknown
827_1	827	Un	55956588	55965978	9391	Un	20311020	20320410	unknown
828_1	828	Un	55966979	55976367	9389	Un	20321411	20330799	unknown
829_1	829	Un	55977368	55986733	9366	Un	20342172	20351537	unknown
830_1	830	Un	55987734	55997092	9359	Un	20352538	20361896	unknown
831_1	831	Un	55998093	56007437	9345	Un	20362897	20372241	unknown
832_1	832	Un	56008438	56017963	9526	Un	20196024	20205549	unknown
833_1	833	Un	56018964	56028277	9314	Un	20373242	20382555	unknown
834_1	834	Un	56029278	56038557	9280	Un	20383556	20392835	unknown
835_1	835	Un	56039558	56048830	9273	Un	20393836	20403108	unknown
836_1	836	Un	56049831	56059875	10045	Un	19839132	19849176	unknown
837_1	837	Un	56060876	56070125	9250	Un	20404109	20413358	unknown
838_1	838	Un	56071126	56080343	9218	Un	20424608	20433825	unknown
839_1	839	Un	56081344	56090538	9195	Un	20434826	20444020	unknown
840_1	840	Un	56091539	56100693	9155	Un	20465367	20474521	unknown
841_1	841	Un	56101694	56112503	10810	Un	19268962	19279771	unknown
842_1	842	Un	56113504	56122641	9138	Un	20475522	20484659	unknown
843_1	843	Un	56123642	56132773	9132	Un	20495793	20504924	unknown
844_1	844	Un	56133774	56142897	9124	Un	20516051	20525174	unknown
845_1	845	Un	56143898	56153085	9188	Un	20445021	20454208	unknown
846_1	846	Un	56154086	56163334	9249	Un	20414359	20423607	unknown
847_1	847	Un	56164335	56173398	9064	Un	20556477	20565540	unknown
848_1	848	Un	56174399	56183556	9158	Un	20455209	20464366	unknown
849_1	849	Un	56184557	56193606	9050	Un	20566541	20575590	unknown
850_1	850	Un	56194607	56203650	9044	Un	20576591	20585634	unknown
851_1	851	Un	56204651	56213686	9036	Un	20596674	20605709	unknown
852_1	852	Un	56214687	56223716	9030	Un	20606710	20615739	unknown
853_1	853	Un	56224717	56233840	9124	Un	20526175	20535298	unknown
854_1	854	Un	56234841	56244497	9657	Un	20089973	20099629	unknown
855_1	855	Un	56245498	56255390	9893	Un	19992941	20002833	unknown
856_1	856	Un	56256391	56265789	9399	Un	20300621	20310019	unknown
857_1	857	Un	56266790	56275772	8983	Un	20626733	20635715	unknown
858_1	858	Un	56276773	56285752	8980	Un	20636716	20645695	unknown
859_1	859	Un	56286753	56295718	8966	Un	20646696	20655661	unknown
860_1	860	Un	56296719	56305683	8965	Un	20656662	20665626	unknown
861_1	861	Un	56306684	56315644	8961	Un	20686552	20695512	unknown
862_1	862	Un	56316645	56325598	8954	Un	20696513	20705466	unknown
863_1	863	Un	56326599	56335545	8947	Un	20706467	20715413	unknown
864_1	864	Un	56336546	56345470	8925	Un	20726348	20735272	unknown
865_1	865	Un	56346471	56355391	8921	Un	20736273	20745193	unknown
866_1	866	Un	56356392	56365312	8921	Un	20746194	20755114	unknown
867_1	867	Un	56366313	56375231	8919	Un	20756115	20765033	unknown
868_1	868	Un	56376232	56385129	8898	Un	20766034	20774931	unknown
869_1	869	Un	56386130	56396944	10815	Un	19257147	19267961	unknown
870_1	870	Un	56397945	56406822	8878	Un	20775932	20784809	unknown
871_1	871	Un	56407823	56416955	9133	Un	20485660	20494792	unknown
872_1	872	Un	56417956	56426818	8863	Un	20785810	20794672	unknown
873_1	873	Un	56427819	56439923	12105	Un	18316748	18328852	unknown
874_1	874	Un	56440924	56450049	9126	Un	20505925	20515050	unknown
875_1	875	Un	56451050	56459867	8818	Un	20805530	20814347	unknown
876_1	876	Un	56460868	56469670	8803	Un	20815348	20824150	unknown
877_1	877	Un	56470671	56479449	8779	Un	20834945	20843723	unknown
878_1	878	Un	56480450	56489215	8766	Un	20844724	20853489	unknown
879_1	879	Un	56490216	56499072	8857	Un	20795673	20804529	unknown
880_1	880	Un	56500073	56509065	8993	Un	20616740	20625732	unknown
881_1	881	Un	56510066	56518793	8728	Un	20864225	20872952	unknown
882_1	882	Un	56519794	56528503	8710	Un	20883677	20892386	unknown
883_1	883	Un	56529504	56538297	8794	Un	20825151	20833944	unknown
884_1	884	Un	56539298	56550983	11686	Un	18523809	18535494	unknown
885_1	885	Un	56551984	56560655	8672	Un	20903060	20911731	unknown
886_1	886	Un	56561656	56570311	8656	Un	20912732	20921387	unknown
887_1	887	Un	56571312	56579951	8640	Un	20922388	20931027	unknown
888_1	888	Un	56580952	56589569	8618	Un	20932028	20940645	unknown
889_1	889	Un	56590570	56599187	8618	Un	20941646	20950263	unknown
890_1	890	Un	56600188	56608798	8611	Un	20951264	20959874	unknown
891_1	891	Un	56609799	56618406	8608	Un	20960875	20969482	unknown
892_1	892	Un	56619407	56627997	8591	Un	20970483	20979073	unknown
893_1	893	Un	56628998	56637580	8583	Un	20980074	20988656	unknown
894_1	894	Un	56638581	56647142	8562	Un	20999222	21007783	unknown
895_1	895	Un	56648143	56656688	8546	Un	21008784	21017329	unknown
896_1	896	Un	56657689	56666412	8724	Un	20873953	20882676	unknown
897_1	897	Un	56667413	56675955	8543	Un	21018330	21026872	unknown
898_1	898	Un	56676956	56685496	8541	Un	21027873	21036413	unknown
899_1	899	Un	56686497	56695013	8517	Un	21046935	21055451	unknown
900_1	900	Un	56696014	56704523	8510	Un	21056452	21064961	unknown
901_1	901	Un	56705524	56713999	8476	Un	21084927	21093402	unknown
902_1	902	Un	56715000	56725653	10654	Un	19386352	19397005	unknown
903_1	903	Un	56726654	56735124	8471	Un	21094403	21102873	unknown
904_1	904	Un	56736125	56744579	8455	Un	21103874	21112328	unknown
905_1	905	Un	56745580	56754314	8735	Un	20854490	20863224	unknown
906_1	906	Un	56755315	56763764	8450	Un	21113329	21121778	unknown
907_1	907	Un	56764765	56773698	8934	Un	20716414	20725347	unknown
908_1	908	Un	56774699	56783132	8434	Un	21122779	21131212	unknown
909_1	909	Un	56784133	56794318	10186	Un	19694722	19704907	unknown
910_1	910	Un	56795319	56803991	8673	Un	20893387	20902059	unknown
911_1	911	Un	56804992	56813407	8416	Un	21141636	21150051	unknown
912_1	912	Un	56814408	56822822	8415	Un	21151052	21159466	unknown
913_1	913	Un	56823823	56832224	8402	Un	21169881	21178282	unknown
914_1	914	Un	56833225	56841789	8565	Un	20989657	20998221	unknown
915_1	915	Un	56842790	56851160	8371	Un	21216811	21225181	unknown
916_1	916	Un	56852161	56860491	8331	Un	21254233	21262563	unknown
917_1	917	Un	56861492	56869806	8315	Un	21272881	21281195	unknown
918_1	918	Un	56870807	56879220	8414	Un	21160467	21168880	unknown
919_1	919	Un	56880221	56888511	8291	Un	21291492	21299782	unknown
920_1	920	Un	56889512	56897886	8375	Un	21207436	21215810	unknown
921_1	921	Un	56898887	56907243	8357	Un	21226182	21234538	unknown
922_1	922	Un	56908244	56916490	8247	Un	21300783	21309029	unknown
923_1	923	Un	56917491	56925716	8226	Un	21310030	21318255	unknown
924_1	924	Un	56926717	56935139	8423	Un	21132213	21140635	unknown
925_1	925	Un	56936140	56944456	8317	Un	21263564	21271880	unknown
926_1	926	Un	56945457	56953670	8214	Un	21319256	21327469	unknown
927_1	927	Un	56954671	56963054	8384	Un	21188668	21197051	unknown
928_1	928	Un	56964055	56972245	8191	Un	21328470	21336660	unknown
929_1	929	Un	56973246	56981432	8187	Un	21346852	21355038	unknown
930_1	930	Un	56982433	56990599	8167	Un	21365216	21373382	unknown
931_1	931	Un	56991600	56999761	8162	Un	21383547	21391708	unknown
932_1	932	Un	57000762	57009145	8384	Un	21198052	21206435	unknown
933_1	933	Un	57010146	57018303	8158	Un	21392709	21400866	unknown
934_1	934	Un	57019304	57027452	8149	Un	21401867	21410015	unknown
935_1	935	Un	57028453	57036596	8144	Un	21420163	21428306	unknown
936_1	936	Un	57037597	57045738	8142	Un	21438451	21446592	unknown
937_1	937	Un	57046739	57054879	8141	Un	21447593	21455733	unknown
938_1	938	Un	57055880	57064019	8140	Un	21456734	21464873	unknown
939_1	939	Un	57065020	57073158	8139	Un	21465874	21474012	unknown
940_1	940	Un	57074159	57082293	8135	Un	21475013	21483147	unknown
941_1	941	Un	57083294	57091418	8125	Un	21484148	21492272	unknown
942_1	942	Un	57092419	57100532	8114	Un	21493273	21501386	unknown
943_1	943	Un	57101533	57109640	8108	Un	21502387	21510494	unknown
944_1	944	Un	57110641	57118739	8099	Un	21520603	21528701	unknown
945_1	945	Un	57119740	57127930	8191	Un	21337661	21345851	unknown
946_1	946	Un	57128931	57137107	8177	Un	21356039	21364215	unknown
947_1	947	Un	57138108	57146173	8066	Un	21529702	21537767	unknown
948_1	948	Un	57147174	57155226	8053	Un	21538768	21546820	unknown
949_1	949	Un	57156227	57164611	8385	Un	21179283	21187667	unknown
950_1	950	Un	57165612	57173658	8047	Un	21556870	21564916	unknown
951_1	951	Un	57174659	57182695	8037	Un	21565917	21573953	unknown
952_1	952	Un	57183696	57191711	8016	Un	21583972	21591987	unknown
953_1	953	Un	57192712	57200726	8015	Un	21592988	21601002	unknown
954_1	954	Un	57201727	57209734	8008	Un	21602003	21610010	unknown
955_1	955	Un	57210735	57218726	7992	Un	21620009	21628000	unknown
956_1	956	Un	57219727	57227708	7982	Un	21629001	21636982	unknown
957_1	957	Un	57228709	57236667	7959	Un	21646950	21654908	unknown
958_1	958	Un	57237668	57245831	8164	Un	21374383	21382546	unknown
959_1	959	Un	57246832	57254760	7929	Un	21664850	21672778	unknown
960_1	960	Un	57255761	57265879	10119	Un	19750463	19760581	unknown
961_1	961	Un	57266880	57274800	7921	Un	21673779	21681699	unknown
962_1	962	Un	57275801	57283719	7919	Un	21682700	21690618	unknown
963_1	963	Un	57284720	57292633	7914	Un	21691619	21699532	unknown
964_1	964	Un	57293634	57301544	7911	Un	21700533	21708443	unknown
965_1	965	Un	57302545	57310453	7909	Un	21709444	21717352	unknown
966_1	966	Un	57311454	57319502	8049	Un	21547821	21555869	unknown
967_1	967	Un	57320503	57328500	7998	Un	21611011	21619008	unknown
969_1	969	Un	57329501	57337389	7889	Un	21736138	21744026	unknown
970_1	970	Un	57338390	57346274	7885	Un	21753913	21761797	unknown
971_1	971	Un	57347275	57358671	11397	Un	18762888	18774284	unknown
972_1	972	Un	57359672	57367533	7862	Un	21771682	21779543	unknown
973_1	973	Un	57368534	57377017	8484	Un	21065962	21074445	unknown
974_1	974	Un	57378018	57386373	8356	Un	21235539	21243894	unknown
975_1	975	Un	57387374	57395223	7850	Un	21780544	21788393	unknown
976_1	976	Un	57396224	57405595	9372	Un	20331800	20341171	unknown
977_1	977	Un	57406596	57414431	7836	Un	21789394	21797229	unknown
978_1	978	Un	57415432	57423259	7828	Un	21807061	21814888	unknown
979_1	979	Un	57424260	57432077	7818	Un	21815889	21823706	unknown
980_1	980	Un	57433078	57440963	7886	Un	21745027	21752912	unknown
981_1	981	Un	57441964	57449847	7884	Un	21762798	21770681	unknown
982_1	982	Un	57450848	57458865	8018	Un	21574954	21582971	unknown
983_1	983	Un	57459866	57467696	7831	Un	21798230	21806060	unknown
984_1	984	Un	57468697	57476420	7724	Un	21842207	21849930	unknown
985_1	985	Un	57477421	57485140	7720	Un	21850931	21858650	unknown
986_1	986	Un	57486141	57493844	7704	Un	21859651	21867354	unknown
987_1	987	Un	57494845	57502516	7672	Un	21868355	21876026	unknown
988_1	988	Un	57503517	57511185	7669	Un	21877027	21884695	unknown
989_1	989	Un	57512186	57519843	7658	Un	21894365	21902022	unknown
990_1	990	Un	57520844	57528499	7656	Un	21903023	21910678	unknown
991_1	991	Un	57529500	57537155	7656	Un	21911679	21919334	unknown
992_1	992	Un	57538156	57549061	10906	Un	19186026	19196931	unknown
993_1	993	Un	57550062	57559166	9105	Un	20536299	20545403	unknown
994_1	994	Un	57560167	57567818	7652	Un	21920335	21927986	unknown
995_1	995	Un	57568819	57576467	7649	Un	21928987	21936635	unknown
996_1	996	Un	57577468	57585103	7636	Un	21937636	21945271	unknown
997_1	997	Un	57586104	57593734	7631	Un	21946272	21953902	unknown
998_1	998	Un	57594735	57602359	7625	Un	21963529	21971153	unknown
999_1	999	Un	57603360	57610962	7603	Un	21980769	21988371	unknown
1000_1	1000	Un	57611963	57619561	7599	Un	21989372	21996970	unknown
1001_1	1001	Un	57620562	57628158	7597	Un	21997971	22005567	unknown
1002_1	1002	Un	57629159	57636752	7594	Un	22006568	22014161	unknown
1003_1	1003	Un	57637753	57649003	11251	Un	18849108	18860358	unknown
1004_1	1004	Un	57650004	57657582	7579	Un	22015162	22022740	unknown
1005_1	1005	Un	57658583	57666149	7567	Un	22023741	22031307	unknown
1006_1	1006	Un	57667150	57674693	7544	Un	22032308	22039851	unknown
1007_1	1007	Un	57675694	57683232	7539	Un	22040852	22048390	unknown
1008_1	1008	Un	57684233	57691769	7537	Un	22049391	22056927	unknown
1009_1	1009	Un	57692770	57700288	7519	Un	22066464	22073982	unknown
1010_1	1010	Un	57701289	57710250	8962	Un	20676590	20685551	unknown
1011_1	1011	Un	57711251	57718758	7508	Un	22092008	22099515	unknown
1012_1	1012	Un	57719759	57727241	7483	Un	22134502	22141984	unknown
1013_1	1013	Un	57728242	57736579	8338	Un	21244895	21253232	unknown
1014_1	1014	Un	57737580	57745044	7465	Un	22151455	22158919	unknown
1015_1	1015	Un	57746045	57753506	7462	Un	22159920	22167381	unknown
1016_1	1016	Un	57754507	57761966	7460	Un	22168382	22175841	unknown
1017_1	1017	Un	57762967	57770907	7941	Un	21655909	21663849	unknown
1018_1	1018	Un	57771908	57779347	7440	Un	22185288	22192727	unknown
1019_1	1019	Un	57780348	57787785	7438	Un	22193728	22201165	unknown
1020_1	1020	Un	57788786	57796210	7425	Un	22202166	22209590	unknown
1021_1	1021	Un	57797211	57804634	7424	Un	22210591	22218014	unknown
1022_1	1022	Un	57805635	57813058	7424	Un	22219015	22226438	unknown
1023_1	1023	Un	57814059	57821464	7406	Un	22235846	22243251	unknown
1024_1	1024	Un	57822465	57831537	9073	Un	20546404	20555476	unknown
1025_1	1025	Un	57832538	57840039	7502	Un	22109024	22116525	unknown
1026_1	1026	Un	57841040	57848575	7536	Un	22057928	22065463	unknown
1027_1	1027	Un	57849576	57857067	7492	Un	22117526	22125017	unknown
1028_1	1028	Un	57858068	57865551	7484	Un	22126018	22133501	unknown
1029_1	1029	Un	57866552	57873922	7371	Un	22252652	22260022	unknown
1030_1	1030	Un	57874923	57882293	7371	Un	22261023	22268393	unknown
1031_1	1031	Un	57883294	57890658	7365	Un	22277763	22285127	unknown
1032_1	1032	Un	57891659	57899021	7363	Un	22286128	22293490	unknown
1033_1	1033	Un	57900022	57907378	7357	Un	22294491	22301847	unknown
1034_1	1034	Un	57908379	57915735	7357	Un	22302848	22310204	unknown
1035_1	1035	Un	57916736	57924088	7353	Un	22311205	22318557	unknown
1036_1	1036	Un	57925089	57932429	7341	Un	22319558	22326898	unknown
1037_1	1037	Un	57933430	57940768	7339	Un	22327899	22335237	unknown
1038_1	1038	Un	57941769	57949086	7318	Un	22344564	22351881	unknown
1039_1	1039	Un	57950087	57957403	7317	Un	22352882	22360198	unknown
1040_1	1040	Un	57958404	57965705	7302	Un	22377821	22385122	unknown
1041_1	1041	Un	57966706	57974006	7301	Un	22386123	22393423	unknown
1042_1	1042	Un	57975007	57982406	7400	Un	22244252	22251651	unknown
1043_1	1043	Un	57983407	57990705	7299	Un	22394424	22401722	unknown
1044_1	1044	Un	57991706	57999331	7626	Un	21954903	21962528	unknown
1045_1	1045	Un	58000332	58007629	7298	Un	22402723	22410020	unknown
1046_1	1046	Un	58008630	58015909	7280	Un	22419303	22426582	unknown
1047_1	1047	Un	58016910	58024181	7272	Un	22427583	22434854	unknown
1048_1	1048	Un	58025182	58032451	7270	Un	22435855	22443124	unknown
1049_1	1049	Un	58033452	58040717	7266	Un	22444125	22451390	unknown
1050_1	1050	Un	58041718	58048980	7263	Un	22452391	22459653	unknown
1051_1	1051	Un	58049981	58057241	7261	Un	22460654	22467914	unknown
1052_1	1052	Un	58058242	58065499	7258	Un	22468915	22476172	unknown
1053_1	1053	Un	58066500	58073752	7253	Un	22477173	22484425	unknown
1054_1	1054	Un	58074753	58081995	7243	Un	22485426	22492668	unknown
1055_1	1055	Un	58082996	58090229	7234	Un	22493669	22500902	unknown
1056_1	1056	Un	58091230	58098448	7219	Un	22501903	22509121	unknown
1057_1	1057	Un	58099449	58106765	7317	Un	22361199	22368515	unknown
1058_1	1058	Un	58107766	58114972	7207	Un	22510122	22517328	unknown
1059_1	1059	Un	58115973	58123277	7305	Un	22369516	22376820	unknown
1060_1	1060	Un	58124278	58131480	7203	Un	22526533	22533735	unknown
1061_1	1061	Un	58132481	58139683	7203	Un	22534736	22541938	unknown
1062_1	1062	Un	58140684	58147883	7200	Un	22542939	22550138	unknown
1063_1	1063	Un	58148884	58156080	7197	Un	22551139	22558335	unknown
1064_1	1064	Un	58157081	58164277	7197	Un	22559336	22566532	unknown
1065_1	1065	Un	58165278	58172723	7446	Un	22176842	22184287	unknown
1066_1	1066	Un	58173724	58180912	7189	Un	22567533	22574721	unknown
1067_1	1067	Un	58181913	58189096	7184	Un	22575722	22582905	unknown
1068_1	1068	Un	58190097	58198617	8521	Un	21037414	21045934	unknown
1069_1	1069	Un	58199618	58206784	7167	Un	22583906	22591072	unknown
1070_1	1070	Un	58207785	58214942	7158	Un	22592073	22599230	unknown
1071_1	1071	Un	58215943	58223085	7143	Un	22608387	22615529	unknown
1072_1	1072	Un	58224086	58231222	7137	Un	22616530	22623666	unknown
1073_1	1073	Un	58232223	58239350	7128	Un	22624667	22631794	unknown
1074_1	1074	Un	58240351	58247463	7113	Un	22632795	22639907	unknown
1075_1	1075	Un	58248464	58255667	7204	Un	22518329	22525532	unknown
1076_1	1076	Un	58256668	58263762	7095	Un	22649021	22656115	unknown
1077_1	1077	Un	58264763	58272232	7470	Un	22142985	22150454	unknown
1078_1	1078	Un	58273233	58280323	7091	Un	22657116	22664206	unknown
1079_1	1079	Un	58281324	58288408	7085	Un	22665207	22672291	unknown
1080_1	1080	Un	58289409	58296476	7068	Un	22681370	22688437	unknown
1081_1	1081	Un	58297477	58304531	7055	Un	22689438	22696492	unknown
1082_1	1082	Un	58305532	58313200	7669	Un	21885696	21893364	unknown
1083_1	1083	Un	58314201	58321710	7510	Un	22083498	22091007	unknown
1084_1	1084	Un	58322711	58329749	7039	Un	22697493	22704531	unknown
1085_1	1085	Un	58330750	58337786	7037	Un	22705532	22712568	unknown
1086_1	1086	Un	58338787	58345811	7025	Un	22713569	22720593	unknown
1087_1	1087	Un	58346812	58353833	7022	Un	22721594	22728615	unknown
1088_1	1088	Un	58354834	58361851	7018	Un	22729616	22736633	unknown
1089_1	1089	Un	58362852	58369964	7113	Un	22640908	22648020	unknown
1090_1	1090	Un	58370965	58377974	7010	Un	22737634	22744643	unknown
1091_1	1091	Un	58378975	58385972	6998	Un	22745644	22752641	unknown
1092_1	1092	Un	58386973	58393961	6989	Un	22753642	22760630	unknown
1093_1	1093	Un	58394962	58401921	6960	Un	22769601	22776560	unknown
1094_1	1094	Un	58402922	58410203	7282	Un	22411021	22418302	unknown
1095_1	1095	Un	58411204	58418142	6939	Un	22777561	22784499	unknown
[truncated: 840 more rows]
