# Supplementary material for: Genome Assembly Improvement and Mapping Convergently Evolved Skeletal Traits in Sticklebacks with Genotyping-by-Sequencing
Source: G3 (Bethesda). 2015 Jun 3;5(7):1463–72. doi: 10.1534/g3.115.017905 (PMC4502380; doi:10.1534/g3.115.017905)
Supplement: Supporting Information [file supp_g3.115.017905_FileS4.xlsx]

## Sheet: FileS4.csv
Scaffold	Length	NewChr	NewStart	NewEnd	NewOrientation	OldChr	OldStart	OldEnd
83	540082	1	1	540082	reverse	1	1	540082
186	138358	1	541083	679440	unknown	Un	37499023	37637380
92	507020	1	680441	1187460	forward	1	541083	1048102
97	495247	1	1188461	1683707	forward	1	1049103	1544349
175	171423	1	1684708	1856130	forward	Un	36027951	36199373
165	168374	1	1857131	2025504	forward	Un	34620012	34788385
30	4389048	1	2026505	6415552	forward	1	1545350	5934397
7	13985904	1	6416553	20402456	forward	1	5935398	19921301
119	290161	1	20403457	20693617	forward	Un	26706540	26996700
22	7367927	1	20694618	28062544	reverse	1	19922302	27290228
74	682422	1	28063545	28745966	forward	Un	18321482	19003903
82	599131	1	28746967	29346097	reverse	1	27586784	28185914
123	294555	1	29347098	29641652	unknown	1	27291229	27585783
98	411577	2	1	411577	reverse	Un	23343224	23754800
63	965607	2	412578	1378184	reverse	2	1	965607
0	21409249	2	1379185	22788433	forward	2	966608	22375856
102	466467	2	22789434	23255900	forward	2	22829186	23295652
96	451329	2	23256901	23708229	reverse	2	22376857	22828185
33	3268600	3	1	3268600	forward	3	1	3268600
15	10827426	3	3269601	14097026	forward	3	3269601	14097026
78	638921	3	14098027	14736947	forward	3	14098027	14736947
169	154270	3	14737948	14892217	forward	Un	35298962	35453231
81	536865	3	14893218	15430082	forward	3	14737948	15274812
201	142603	3	15431083	15573685	unknown	Un	38908937	39051539
50	1522694	3	15574686	17097379	forward	3	15275813	16798506
135	246067	3	17098380	17344446	reverse	Un	30097082	30343148
120	303103	3	17345447	17648549	reverse	Un	26997701	27300803
161	158182	3	17649550	17807731	forward	Un	33862777	34020958
65	1068876	4	1	1068876	forward	4	1	1068876
222	103458	4	1069877	1173334	unknown	4	1069877	1173334
20	7861250	4	1174335	9035584	forward	4	1174335	9035584
17	8782472	4	9036585	17819056	forward	4	9036585	17819056
24	5623859	4	17820057	23443915	reverse	4	22731829	28355687
108	349258	4	23444916	23794173	reverse	Un	24937440	25286697
28	4910772	4	23795174	28705945	reverse	4	17820057	22730828
42	2095096	4	28706946	30802041	forward	4	28356688	30451783
41	2180165	4	30803042	32983206	forward	4	30452784	32632948
121	391895	4	32984207	33376101	reverse	Un	27301804	27693698
152	266236	4	33377102	33643337	reverse	Un	32548296	32814531
90	509074	4	33644338	34153411	reverse	Un	21813335	22322408
54	1212556	5	1	1212556	forward	Un	11244841	12457396
48	1738986	5	1213557	2952542	forward	Un	9504855	11243840
19	7877689	5	2953543	10831231	reverse	5	1	7877689
38	2657443	5	10832232	13489674	forward	5	7878690	10536132
93	460225	5	13490675	13950899	reverse	5	10537133	10997357
73	743380	5	13951900	14695279	reverse	5	10998358	11741737
112	357655	5	14696280	15053934	reverse	Un	25632574	25990228
142	210318	5	15054935	15265252	forward	5	11742738	11953055
125	297342	5	15266253	15563594	reverse	5	11954056	12251397
61	1001911	6	1	1001911	reverse	Un	14739453	15741363
66	884755	6	1002912	1887666	reverse	6	1	884755
76	596175	6	1888667	2484841	reverse	Un	19004904	19601078
35	3171024	6	2485842	5656865	reverse	6	885756	4056779
13	12359755	6	5657866	18017620	forward	6	4057780	16417534
140	241116	6	18018621	18259736	unknown	6	16418535	16659650
117	423025	6	18260737	18683761	forward	6	16660651	17083675
156	170221	6	18684762	18854982	forward	Un	33192445	33362665
129	274688	7	1	274688	reverse	Un	28544618	28819305
131	252297	7	275689	527985	forward	Un	29057819	29310115
86	539725	7	528986	1068710	reverse	7	1	539725
118	386533	7	1069711	1456243	forward	7	540726	927258
55	1270640	7	1457244	2727883	forward	7	928259	2198898
39	2408260	7	2728884	5137143	forward	7	2199899	4608158
23	5801771	7	5138144	10939914	forward	7	4609159	10410929
106	373368	7	10940915	11314282	forward	Un	24563072	24936439
47	1748180	7	11315283	13063462	reverse	Un	7755675	9503854
1	17201617	7	13064463	30266079	forward	7	10411930	27613546
132	259421	7	30267080	30526500	forward	Un	29311116	29570536
113	322897	7	30527501	30850397	forward	7	27614547	27937443
56	1168921	8	1	1168921	forward	Un	12458397	13627317
53	1370556	8	1169922	2540477	forward	8	1	1370556
36	3129284	8	2541478	5670761	forward	8	1371557	4500840
9	13619508	8	5671762	19291269	forward	8	4501841	18121348
71	823161	8	19292270	20115430	forward	8	18122349	18945509
138	235227	8	20116431	20351657	reverse	8	19133478	19368704
153	185968	8	20352658	20538625	reverse	8	18946510	19132477
31	4308199	9	1	4308199	forward	9	1	4308199
8	13584991	9	4309200	17894190	reverse	9	4309200	17894190
77	604609	9	17895191	18499799	forward	9	17895191	18499799
91	530449	9	18500800	19031248	reverse	9	18500800	19031248
105	452835	9	19032249	19485083	forward	9	19032249	19485083
183	121211	9	19486084	19607294	reverse	9	19486084	19607294
198	108707	9	19608295	19717001	unknown	Un	38598002	38706708
189	116918	9	19718002	19834919	forward	9	19627166	19744083
177	148997	9	19835920	19984916	forward	Un	36343914	36492910
244	102481	9	19985917	20088397	unknown	Un	42813443	42915923
87	504396	9	20089398	20593793	reverse	9	19745084	20249479
111	343876	10	1	343876	forward	Un	25287698	25631573
130	236513	10	344877	581389	reverse	Un	28820306	29056818
101	384623	10	582390	967012	reverse	Un	24177449	24562071
58	1110135	10	968013	2078147	reverse	Un	13628318	14738452
5	14541209	10	2079148	16620356	forward	10	1	14541209
149	187351	10	16621357	16808707	forward	Un	31976087	32163437
208	109349	10	16809708	16919056	reverse	Un	39711137	39820485
59	1115231	10	16920057	18035287	forward	10	14542210	15657440
80	591236	11	1	591236	forward	Un	19602079	20193314
167	154914	11	592237	747150	unknown	Un	34987570	35142483
75	620152	11	748151	1368302	forward	11	1	620152
49	1583387	11	1369303	2952689	reverse	11	621153	2204539
11	12946374	11	2953690	15900063	forward	11	2205540	15151913
151	191377	11	15901064	16092440	forward	Un	32355919	32547295
79	583761	11	16093441	16677201	reverse	11	15152914	15736674
103	394347	11	16678202	17072548	reverse	11	15737675	16132021
100	429279	11	17073549	17502827	reverse	11	16133022	16562300
190	142752	11	17503828	17646579	unknown	11	16563301	16706052
114	369292	12	1	369292	forward	Un	25991229	26360520
139	222911	12	370293	593203	reverse	Un	30594894	30817804
195	147321	12	594204	741524	reverse	Un	38233625	38380945
180	137802	12	742525	880326	unknown	Un	36787135	36924936
158	180396	12	881327	1061722	forward	12	1	180396
62	1064986	12	1062723	2127708	forward	12	181397	1246382
99	420648	12	2128709	2549356	reverse	Un	23755801	24176448
68	869172	12	2550357	3419528	forward	Un	16636734	17505905
64	961029	12	3420529	4381557	forward	12	1247383	2208411
6	14338203	12	4382558	18720760	reverse	12	2209412	16547614
70	740904	12	18721761	19462664	reverse	12	16548615	17289518
60	1110549	12	19463665	20574213	reverse	12	17290519	18401067
148	196909	12	20575214	20772122	forward	Un	31778178	31975086
51	1474264	13	1	1474264	reverse	13	1	1474264
52	1348893	13	1475265	2824157	forward	13	1475265	2824157
4	15656014	13	2825158	18481171	forward	13	2825158	18481171
57	1168419	13	18482172	19650590	reverse	13	18482172	19650590
220	120098	13	19651591	19771688	unknown	Un	40784669	40904766
107	418911	13	19772689	20191599	reverse	13	19651591	20070501
200	101275	13	20192600	20293874	unknown	Un	38806662	38907936
150	190481	13	20294875	20485355	reverse	Un	32164438	32354918
133	266407	13	20486356	20752762	unknown	Un	29571537	29837943
176	142540	14	1	142540	unknown	Un	36200374	36342913
116	345721	14	143541	489261	reverse	14	1	345721
197	115429	14	490262	605690	forward	Un	38481573	38597001
168	154478	14	606691	761168	reverse	Un	35143484	35297961
12	12736214	14	762169	13498382	forward	14	346722	13082935
40	2162526	14	13499383	15661908	reverse	14	13083936	15246461
88	508853	14	15662909	16171761	reverse	Un	20758748	21267600
110	341541	15	1	341541	reverse	15	1	341541
159	166851	15	342542	509392	forward	Un	33535842	33702692
184	147696	15	510393	658088	reverse	Un	37197910	37345605
72	727327	15	659089	1386415	reverse	15	342542	1069868
10	13308967	15	1387416	14696382	forward	15	1070869	14379835
128	251254	15	14697383	14948636	reverse	Un	28292364	28543617
45	1809037	15	14949637	16758673	reverse	15	14380836	16189872
84	563433	15	16759674	17323106	forward	Un	20194315	20757747
26	5281402	16	1	5281402	forward	16	1	5281402
14	10886345	16	5282403	16168747	forward	16	5282403	16168747
44	1946041	16	16169748	18115788	reverse	16	16169748	18115788
115	344019	16	18116789	18460807	reverse	Un	26361521	26705539
181	135462	16	18461808	18597269	forward	Un	36925937	37061398
69	813576	16	18598270	19411845	reverse	Un	17506906	18320481
202	109749	16	19412846	19522594	reverse	Un	39052540	39162288
89	543734	17	1	543734	forward	Un	21268601	21812334
109	409613	17	544735	954347	reverse	17	1	409613
136	230897	17	955348	1186244	reverse	17	410614	641510
191	123367	17	1187245	1310611	unknown	17	642511	765877
174	168336	17	1311612	1479947	forward	17	766878	935213
25	5511944	17	1480948	6992891	forward	17	936214	6448157
27	5105261	17	6993892	12099152	reverse	Un	1	5105261
18	8153984	17	12100153	20254136	forward	17	6449158	14603141
29	4822594	18	1	4822594	forward	18	1	4822594
21	7404426	18	4823595	12228020	forward	18	4823595	12228020
32	3761673	18	12229021	15990693	forward	18	12229021	15990693
85	529649	19	1	529649	forward	19	1	529649
163	161911	19	530650	692560	reverse	Un	34198026	34359936
34	3292604	19	693561	3986164	forward	19	530650	3823253
224	208153	19	3987165	4195317	unknown	Un	41062695	41270847
3	16416407	19	4196318	20612724	reverse	19	3824254	20240660
157	171176	20	1	171176	forward	Un	33363666	33534841
137	249745	20	172177	421921	forward	Un	30344149	30593893
104	415733	20	422922	838654	forward	20	1	415733
170	175369	20	839655	1015023	forward	20	416734	592102
122	304788	20	1016024	1320811	forward	Un	27694699	27999486
143	240039	20	1321812	1561850	forward	20	593103	833141
2	17116695	20	1562851	18679545	reverse	20	834142	17950836
46	1780235	20	18680546	20460780	forward	20	17951837	19732071
94	517387	21	1	517387	unknown	Un	22323409	22840795
95	500428	21	518388	1018815	forward	Un	22841796	23342223
134	257138	21	1019816	1276953	unknown	Un	29838944	30096081
147	215782	21	1277954	1493735	unknown	Un	31561396	31777177
144	297070	21	1494736	1791805	unknown	21	1	297070
37	2648413	21	1792806	4441218	forward	Un	5106262	7754674
16	9196662	21	4442219	13638880	forward	21	298071	9494732
43	1902836	21	13639881	15542716	forward	21	9495733	11398568
67	893370	21	15543717	16437086	forward	Un	15742364	16635733
127	266767	21	16438087	16704853	forward	21	11399569	11666335
126	290877	21	16705854	16996730	forward	Un	28000487	28291363
146	224531	21	16997731	17222261	reverse	Un	31335865	31560395
182	134511	21	17223262	17357772	reverse	Un	37062399	37196909
145	295500	Un	1	295500	unknown	Un	31039365	31334864
124	291023	Un	296501	587523	unknown	18	15991694	16282716
164	258075	Un	588524	846598	unknown	Un	34360937	34619011
141	219560	Un	847599	1067158	unknown	Un	30818805	31038364
173	209803	Un	1068159	1277961	unknown	Un	35817148	36026950
166	197184	Un	1278962	1476145	unknown	Un	34789386	34986569
155	190672	Un	1477146	1667817	unknown	Un	33000773	33191444
171	186377	Un	1668818	1855194	unknown	Un	35454232	35640608
154	184241	Un	1856195	2040435	unknown	Un	32815532	32999772
162	175067	Un	2041436	2216502	unknown	Un	34021959	34197025
172	174539	Un	2217503	2392041	unknown	Un	35641609	35816147
232	172204	Un	2393042	2565245	unknown	Un	41867532	42039735
160	158084	Un	2566246	2724329	unknown	Un	33703693	33861776
179	156101	Un	2725330	2881430	unknown	Un	36630034	36786134
185	151417	Un	2882431	3033847	unknown	Un	37346606	37498022
192	135576	Un	3034848	3170423	unknown	Un	37876714	38012289
178	135123	Un	3171424	3306546	unknown	Un	36493911	36629033
205	126450	Un	3307547	3433996	unknown	Un	39364832	39491281
226	125417	Un	3434997	3560413	unknown	Un	41363992	41489408
188	121219	Un	3561414	3682632	unknown	Un	37754495	37875713
207	117296	Un	3683633	3800928	unknown	Un	39592841	39710136
194	117285	Un	3801929	3919213	unknown	Un	38115340	38232624
187	115114	Un	3920214	4035327	unknown	Un	37638381	37753494
203	108077	Un	4036328	4144404	unknown	Un	39163289	39271365
193	101050	Un	4145405	4246454	unknown	Un	38013290	38114339
227	99763	Un	4247455	4347217	unknown	Un	41490409	41590171
206	99559	Un	4348218	4447776	unknown	Un	39492282	39591840
196	98627	Un	4448777	4547403	unknown	Un	38381946	38480572
199	97953	Un	4548404	4646356	unknown	Un	38707709	38805661
242	95411	Un	4647357	4742767	unknown	Un	42638668	42734078
321	95125	Un	4743768	4838892	unknown	Un	46876408	46971532
216	94716	Un	4839893	4934608	unknown	Un	40435996	40530711
215	94574	Un	4935609	5030182	unknown	Un	40340422	40434995
254	93935	Un	5031183	5125117	unknown	Un	43455659	43549593
259	93105	Un	5126118	5219222	unknown	Un	43742337	43835441
204	91466	Un	5220223	5311688	unknown	Un	39272366	39363831
225	91144	Un	5312689	5403832	unknown	Un	41271848	41362991
218	89394	Un	5404833	5494226	unknown	Un	40614025	40703418
209	88137	Un	5495227	5583363	unknown	Un	39821486	39909622
214	87744	Un	5584364	5672107	unknown	Un	40251678	40339421
212	85982	Un	5673108	5759089	unknown	Un	40078298	40164279
213	85398	Un	5760090	5845487	unknown	Un	40165280	40250677
210	83983	Un	5846488	5930470	unknown	Un	39910623	39994605
211	81692	Un	5931471	6013162	unknown	Un	39995606	40077297
217	81313	Un	6014163	6095475	unknown	Un	40531712	40613024
223	80968	Un	6096476	6177443	unknown	Un	40980727	41061694
219	79250	Un	6178444	6257693	unknown	Un	40704419	40783668
243	77364	Un	6258694	6336057	unknown	Un	42735079	42812442
264	76560	Un	6337058	6413617	unknown	Un	44059894	44136453
221	73960	Un	6414618	6488577	unknown	Un	40905767	40979726
233	73492	Un	6489578	6563069	unknown	Un	42040736	42114227
250	72636	Un	6564070	6636705	unknown	Un	43209947	43282582
231	71955	Un	6637706	6709660	unknown	Un	41794577	41866531
271	71937	Un	6710661	6782597	unknown	Un	44476221	44548157
265	71712	Un	6783598	6855309	unknown	Un	44137454	44209165
255	70686	Un	6856310	6926995	unknown	Un	43550594	43621279
234	70511	Un	6927996	6998506	unknown	Un	42115228	42185738
278	69444	Un	6999507	7068950	unknown	Un	44821395	44890838
281	69191	Un	7069951	7139141	unknown	Un	44994621	45063811
237	67728	Un	7140142	7207869	unknown	Un	42315881	42383608
228	67660	Un	7208870	7276529	unknown	Un	41591172	41658831
230	67493	Un	7277530	7345022	unknown	Un	41726084	41793576
301	66799	Un	7346023	7412821	unknown	Un	45961252	46028050
240	66213	Un	7413822	7480034	unknown	Un	42510290	42576502
229	65252	Un	7481035	7546286	unknown	Un	41659832	41725083
253	65189	Un	7547287	7612475	unknown	Un	43389470	43454658
318	63963	Un	7613476	7677438	unknown	Un	46725951	46789913
235	63932	Un	7678439	7742370	unknown	Un	42186739	42250670
236	63210	Un	7743371	7806580	unknown	Un	42251671	42314880
290	63144	Un	7807581	7870724	unknown	Un	45447759	45510902
287	62246	Un	7871725	7933970	unknown	Un	45286319	45348564
238	62242	Un	7934971	7997212	unknown	Un	42384609	42446850
342	62103	Un	7998213	8060315	unknown	Un	47804064	47866166
245	61692	Un	8061316	8123007	unknown	Un	42916924	42978615
239	61439	Un	8124008	8185446	unknown	Un	42447851	42509289
311	60562	Un	8186447	8247008	unknown	Un	46400029	46460590
280	60509	Un	8248009	8308517	unknown	Un	44933112	44993620
258	60309	Un	8309518	8369826	unknown	Un	43681028	43741336
241	60165	Un	8370827	8430991	unknown	Un	42577503	42637667
268	59728	Un	8431992	8491719	unknown	Un	44326427	44386154
328	59670	Un	8492720	8552389	unknown	Un	47209679	47269348
339	59037	Un	8553390	8612426	unknown	Un	47663142	47722178
296	58761	Un	8613427	8672187	unknown	Un	45736233	45794993
350	58727	Un	8673188	8731914	unknown	Un	48097868	48156594
249	58497	Un	8732915	8791411	unknown	Un	43150450	43208946
308	58451	Un	8792412	8850862	unknown	Un	46267712	46326162
246	58348	Un	8851863	8910210	unknown	Un	42979616	43037963
267	57760	Un	8911211	8968970	unknown	Un	44267667	44325426
256	57748	Un	8969971	9027718	unknown	Un	43622280	43680027
289	57014	Un	9028719	9085732	unknown	Un	45389745	45446758
334	56813	Un	9086733	9143545	unknown	Un	47425274	47482086
266	56501	Un	9144546	9201046	unknown	Un	44210166	44266666
260	56380	Un	9202047	9258426	unknown	Un	43836442	43892821
272	56244	Un	9259427	9315670	unknown	Un	44549158	44605401
283	56026	Un	9316671	9372696	unknown	Un	45105697	45161722
306	55522	Un	9373697	9429218	unknown	Un	46175505	46231026
248	55145	Un	9430219	9485363	unknown	Un	43094305	43149449
348	54896	Un	9486364	9541259	unknown	Un	48014358	48069253
263	54881	Un	9542260	9597140	unknown	Un	44004013	44058893
261	54348	Un	9598141	9652488	unknown	Un	43893822	43948169
247	54341	Un	9653489	9707829	unknown	Un	43038964	43093304
262	53843	Un	9708830	9762672	unknown	Un	43949170	44003012
300	53692	Un	9763673	9817364	unknown	Un	45906560	45960251
294	53528	Un	9818365	9871892	unknown	Un	45643026	45696553
326	53463	Un	9872893	9926355	unknown	Un	47124039	47177501
323	53451	Un	9927356	9980806	unknown	Un	47006411	47059861
317	53197	Un	9981807	10035003	unknown	Un	46671754	46724950
313	53016	Un	10036004	10089019	unknown	Un	46514490	46567505
251	52946	Un	10090020	10142965	unknown	Un	43283583	43336528
449	52136	Un	10143966	10196101	unknown	Un	50509055	50561190
312	51899	Un	10197102	10249000	unknown	Un	46461591	46513489
476	51862	Un	10250001	10301862	unknown	Un	51044725	51096586
319	51614	Un	10302863	10354476	unknown	Un	46790914	46842527
293	51155	Un	10355477	10406631	unknown	Un	45590871	45642025
352	51043	Un	10407632	10458674	unknown	Un	48185127	48236169
338	50973	Un	10459675	10510647	unknown	Un	47611169	47662141
341	50959	Un	10511648	10562606	unknown	Un	47752105	47803063
252	50941	Un	10563607	10614547	unknown	Un	43337529	43388469
257	50152	Un	10615548	10665699	unknown	21	11667336	11717487
360	48964	Un	10666700	10715663	unknown	Un	48444628	48493591
335	48937	Un	10716664	10765600	unknown	Un	47483087	47532023
387	47752	Un	10766601	10814352	unknown	Un	49159782	49207533
336	47011	Un	10815353	10862363	unknown	Un	47533024	47580034
356	45946	Un	10863364	10909309	unknown	Un	48319619	48365564
557	45232	Un	10910310	10955541	unknown	Un	52437456	52482687
269	44336	Un	10956542	11000877	unknown	Un	44387155	44431490
368	43734	Un	11001878	11045611	unknown	Un	48671136	48714869
274	43351	Un	11046612	11089962	unknown	Un	44649497	44692847
808	43262	Un	11090963	11134224	unknown	Un	55715959	55759220
270	42730	Un	11135225	11177954	unknown	Un	44432491	44475220
273	42095	Un	11178955	11221049	unknown	Un	44606402	44648496
275	42085	Un	11222050	11264134	unknown	Un	44693848	44735932
276	41570	Un	11265135	11306704	unknown	Un	44736933	44778502
285	40908	Un	11307705	11348612	unknown	Un	45203822	45244729
277	40892	Un	11349613	11390504	unknown	Un	44779503	44820394
279	40273	Un	11391505	11431777	unknown	Un	44891839	44932111
284	40099	Un	11432778	11472876	unknown	Un	45162723	45202821
282	39885	Un	11473877	11513761	unknown	Un	45064812	45104696
672	39604	Un	11514762	11554365	unknown	Un	54094585	54134188
286	39589	Un	11555366	11594954	unknown	Un	45245730	45285318
288	39180	Un	11595955	11635134	unknown	Un	45349565	45388744
291	38662	Un	11636135	11674796	unknown	Un	45511903	45550564
302	38490	Un	11675797	11714286	unknown	Un	46029051	46067540
292	38306	Un	11715287	11753592	unknown	Un	45551565	45589870
295	37679	Un	11754593	11792271	unknown	Un	45697554	45735232
310	36267	Un	11793272	11829538	unknown	Un	46362762	46399028
297	36171	Un	11830539	11866709	unknown	Un	45795994	45832164
298	35853	Un	11867710	11903562	unknown	Un	45833165	45869017
299	35542	Un	11904563	11940104	unknown	Un	45870018	45905559
314	34784	Un	11941105	11975888	unknown	Un	46568506	46603289
304	34754	Un	11976889	12011642	unknown	Un	46104087	46138840
307	34685	Un	12012643	12047327	unknown	Un	46232027	46266711
305	34664	Un	12048328	12082991	unknown	Un	46139841	46174504
309	34599	Un	12083992	12118590	unknown	Un	46327163	46361761
303	34546	Un	12119591	12154136	unknown	Un	46068541	46103086
315	33261	Un	12155137	12188397	unknown	Un	46604290	46637550
322	32878	Un	12189398	12222275	unknown	Un	46972533	47005410
316	32203	Un	12223276	12255478	unknown	Un	46638551	46670753
344	32090	Un	12256479	12288568	unknown	Un	47896532	47928621
320	31880	Un	12289569	12321448	unknown	Un	46843528	46875407
332	31115	Un	12322449	12353563	unknown	Un	47362639	47393753
324	30803	Un	12354564	12385366	unknown	Un	47060862	47091664
325	30374	Un	12386367	12416740	unknown	Un	47092665	47123038
327	30177	Un	12417741	12447917	unknown	Un	47178502	47208678
329	29990	Un	12448918	12478907	unknown	Un	47270349	47300338
330	29714	Un	12479908	12509621	unknown	Un	47301339	47331052
331	29586	Un	12510622	12540207	unknown	Un	47332053	47361638
333	29520	Un	12541208	12570727	unknown	Un	47394754	47424273
337	29134	Un	12571728	12600861	unknown	Un	47581035	47610168
353	28864	Un	12601862	12630725	unknown	Un	48237170	48266033
345	28473	Un	12631726	12660198	unknown	Un	47929622	47958094
343	28365	Un	12661199	12689563	unknown	Un	47867167	47895531
340	27926	Un	12690564	12718489	unknown	Un	47723179	47751104
346	26773	Un	12719490	12746262	unknown	Un	47959095	47985867
349	26614	Un	12747263	12773876	unknown	Un	48070254	48096867
351	26532	Un	12774877	12801408	unknown	Un	48157595	48184126
347	26490	Un	12802409	12828898	unknown	Un	47986868	48013357
377	26092	Un	12829899	12855990	unknown	Un	48913652	48939743
394	25577	Un	12856991	12882567	unknown	Un	49346925	49372501
354	25468	Un	12883568	12909035	unknown	Un	48267034	48292501
358	25373	Un	12910036	12935408	unknown	Un	48392572	48417944
398	25355	Un	12936409	12961763	unknown	Un	49441578	49466932
382	25154	Un	12962764	12987917	unknown	Un	49038709	49063862
355	25117	Un	12988918	13014034	unknown	Un	48293502	48318618
357	25007	Un	13015035	13040041	unknown	Un	48366565	48391571
359	24683	Un	13041042	13065724	unknown	Un	48418945	48443627
361	24471	Un	13066725	13091195	unknown	Un	48494592	48519062
362	24363	Un	13092196	13116558	unknown	Un	48520063	48544425
363	24258	Un	13117559	13141816	unknown	Un	48545426	48569683
365	24246	Un	13142817	13167062	unknown	Un	48595857	48620102
371	24210	Un	13168063	13192272	unknown	Un	48765712	48789921
369	24183	Un	13193273	13217455	unknown	Un	48715870	48740052
364	24173	Un	13218456	13242628	unknown	Un	48570684	48594856
366	24037	Un	13243629	13267665	unknown	Un	48621103	48645139
378	24000	Un	13268666	13292665	unknown	Un	48940744	48964743
367	23996	Un	13293666	13317661	unknown	Un	48646140	48670135
372	23965	Un	13318662	13342626	unknown	Un	48790922	48814886
376	23904	Un	13343627	13367530	unknown	Un	48888748	48912651
370	23659	Un	13368531	13392189	unknown	Un	48741053	48764711
379	23572	Un	13393190	13416761	unknown	Un	48965744	48989315
401	23549	Un	13417762	13441310	unknown	Un	49512559	49536107
380	23511	Un	13442311	13465821	unknown	Un	48990316	49013826
373	23462	Un	13466822	13490283	unknown	Un	48815887	48839348
374	23207	Un	13491284	13514490	unknown	Un	48840349	48863555
383	23201	Un	13515491	13538691	unknown	Un	49064863	49088063
375	23192	Un	13539692	13562883	unknown	Un	48864556	48887747
381	22882	Un	13563884	13586765	unknown	Un	49014827	49037708
388	22715	Un	13587766	13610480	unknown	Un	49208534	49231248
385	22640	Un	13611481	13634120	unknown	Un	49112679	49135318
384	22615	Un	13635121	13657735	unknown	Un	49089064	49111678
439	22604	Un	13658736	13681339	unknown	Un	50331895	50354498
389	22600	Un	13682340	13704939	unknown	Un	49232249	49254848
386	22463	Un	13705940	13728402	unknown	Un	49136319	49158781
420	22374	Un	13729403	13751776	unknown	Un	49932291	49954664
406	22335	Un	13752777	13775111	unknown	Un	49624833	49647167
433	22029	Un	13776112	13798140	unknown	Un	50208623	50230651
396	22001	Un	13799141	13821141	unknown	Un	49396099	49418099
390	21969	Un	13822142	13844110	unknown	Un	49255849	49277817
425	21819	Un	13845111	13866929	unknown	Un	50039856	50061674
392	21752	Un	13867930	13889681	unknown	Un	49301532	49323283
391	21714	Un	13890682	13912395	unknown	Un	49278818	49300531
411	21643	Un	13913396	13935038	unknown	Un	49736664	49758306
393	21641	Un	13936039	13957679	unknown	Un	49324284	49345924
395	21597	Un	13958680	13980276	unknown	Un	49373502	49395098
397	21478	Un	13981277	14002754	unknown	Un	49419100	49440577
414	21471	Un	14003755	14025225	unknown	Un	49803316	49824786
412	21467	Un	14026226	14047692	unknown	Un	49759307	49780773
409	21426	Un	14048693	14070118	unknown	Un	49692235	49713660
400	21375	Un	14071119	14092493	unknown	Un	49490184	49511558
399	21251	Un	14093494	14114744	unknown	Un	49467933	49489183
407	21212	Un	14115745	14136956	unknown	Un	49648168	49669379
402	21020	Un	14137957	14158976	unknown	Un	49537108	49558127
410	21003	Un	14159977	14180979	unknown	Un	49714661	49735663
404	20940	Un	14181980	14202919	unknown	Un	49581057	49601996
403	20929	Un	14203920	14224848	unknown	Un	49559128	49580056
408	20855	Un	14225849	14246703	unknown	Un	49670380	49691234
428	20855	Un	14247704	14268558	unknown	Un	50104045	50124899
405	20836	Un	14269559	14290394	unknown	Un	49602997	49623832
422	20613	Un	14291395	14312007	unknown	Un	49976658	49997270
413	20542	Un	14313008	14333549	unknown	Un	49781774	49802315
415	20388	Un	14334550	14354937	unknown	Un	49825787	49846174
416	20350	Un	14355938	14376287	unknown	Un	49847175	49867524
417	20294	Un	14377288	14397581	unknown	Un	49868525	49888818
418	20264	Un	14398582	14418845	unknown	Un	49889819	49910082
419	20208	Un	14419846	14440053	unknown	Un	49911083	49931290
431	20036	Un	14441054	14461089	unknown	Un	50167183	50187218
421	19993	Un	14462090	14482082	unknown	Un	49955665	49975657
424	19838	Un	14483083	14502920	unknown	Un	50019018	50038855
423	19747	Un	14503921	14523667	unknown	Un	49998271	50018017
430	19733	Un	14524668	14544400	unknown	Un	50146450	50166182
426	19720	Un	14545401	14565120	unknown	Un	50062675	50082394
427	19650	Un	14566121	14585770	unknown	Un	50083395	50103044
429	19550	Un	14586771	14606320	unknown	Un	50125900	50145449
437	19483	Un	14607321	14626803	unknown	Un	50291711	50311193
432	19404	Un	14627804	14647207	unknown	Un	50188219	50207622
434	19165	Un	14648208	14667372	unknown	Un	50231652	50250816
435	19078	Un	14668373	14687450	unknown	Un	50251817	50270894
436	18816	Un	14688451	14707266	unknown	Un	50271895	50290710
541	18766	Un	14708267	14727032	unknown	Un	52181530	52200295
452	18747	Un	14728033	14746779	unknown	Un	50600417	50619163
438	18701	Un	14747780	14766480	unknown	Un	50312194	50330894
451	18533	Un	14767481	14786013	unknown	Un	50580884	50599416
440	18468	Un	14787014	14805481	unknown	Un	50355499	50373966
441	18431	Un	14806482	14824912	unknown	Un	50374967	50393397
457	18408	Un	14825913	14844320	unknown	Un	50693995	50712402
442	18369	Un	14845321	14863689	unknown	Un	50394398	50412766
444	18119	Un	14864690	14882808	unknown	Un	50432848	50450966
448	18114	Un	14883809	14901922	unknown	Un	50489941	50508054
466	18111	Un	14902923	14921033	unknown	Un	50861313	50879423
443	18081	Un	14922034	14940114	unknown	Un	50413767	50431847
480	18073	Un	14941115	14959187	unknown	Un	51150724	51168796
471	18021	Un	14960188	14978208	unknown	Un	50953591	50971611
446	17995	Un	14979209	14997203	unknown	Un	50470946	50488940
467	17985	Un	14998204	15016188	unknown	Un	50880424	50898408
445	17979	Un	15017189	15035167	unknown	Un	50451967	50469945
447	17871	Un	15036168	15054038	unknown	9	19608295	19626165
462	17803	Un	15055039	15072841	unknown	Un	50787287	50805089
481	17731	Un	15073842	15091572	unknown	Un	51169797	51187527
450	17693	Un	15092573	15110265	unknown	Un	50562191	50579883
461	17664	Un	15111266	15128929	unknown	Un	50768623	50786286
453	17602	Un	15129930	15147531	unknown	Un	50620164	50637765
562	17532	Un	15148532	15166063	unknown	Un	52543993	52561524
458	17509	Un	15167064	15184572	unknown	Un	50713403	50730911
464	17505	Un	15185573	15203077	unknown	Un	50824406	50841910
488	17505	Un	15204078	15221582	unknown	Un	51293829	51311333
454	17414	Un	15222583	15239996	unknown	Un	50638766	50656179
455	17412	Un	15240997	15258408	unknown	Un	50657180	50674591
456	17403	Un	15259409	15276811	unknown	Un	50675592	50692994
465	17402	Un	15277812	15295213	unknown	Un	50842911	50860312
459	17370	Un	15296214	15313583	unknown	Un	50731912	50749281
460	17341	Un	15314584	15331924	unknown	Un	50750282	50767622
474	17336	Un	15332925	15350260	unknown	Un	51008660	51025995
511	17336	Un	15351261	15368596	unknown	Un	51688524	51705859
463	17316	Un	15369597	15386912	unknown	Un	50806090	50823405
501	17160	Un	15387913	15405072	unknown	Un	51519186	51536345
472	17099	Un	15406073	15423171	unknown	Un	50972612	50989710
468	17081	Un	15424172	15441252	unknown	Un	50899409	50916489
469	17055	Un	15442253	15459307	unknown	Un	50917490	50934544
470	17046	Un	15460308	15477353	unknown	Un	50935545	50952590
505	17024	Un	15478354	15495377	unknown	Un	51587326	51604349
487	16965	Un	15496378	15513342	unknown	Un	51275864	51292828
473	16949	Un	15514343	15531291	unknown	Un	50990711	51007659
478	16888	Un	15532292	15549179	unknown	Un	51115257	51132144
491	16797	Un	15550180	15566976	unknown	Un	51346993	51363789
579	16788	Un	15567977	15584764	unknown	Un	52804385	52821172
485	16745	Un	15585765	15602509	unknown	Un	51240817	51257561
475	16729	Un	15603510	15620238	unknown	Un	51026996	51043724
513	16679	Un	15621239	15637917	unknown	Un	51723880	51740558
477	16670	Un	15638918	15655587	unknown	Un	51097587	51114256
479	16579	Un	15656588	15673166	unknown	Un	51133145	51149723
543	16576	Un	15674167	15690742	unknown	Un	52217042	52233617
494	16559	Un	15691743	15708301	unknown	Un	51399458	51416016
496	16511	Un	15709302	15725812	unknown	Un	51434235	51450745
492	16485	Un	15726813	15743297	unknown	Un	51364790	51381274
483	16484	Un	15744298	15760781	unknown	Un	51205987	51222470
482	16459	Un	15761782	15778240	unknown	Un	51188528	51204986
484	16346	Un	15779241	15795586	unknown	Un	51223471	51239816
489	16334	Un	15796587	15812920	unknown	Un	51312334	51328667
490	16325	Un	15813921	15830245	unknown	Un	51329668	51345992
486	16302	Un	15831246	15847547	unknown	Un	51258562	51274863
495	16218	Un	15848548	15864765	unknown	Un	51417017	51433234
522	16208	Un	15865766	15881973	unknown	Un	51873570	51889777
493	16183	Un	15882974	15899156	unknown	Un	51382275	51398457
512	16020	Un	15900157	15916176	unknown	Un	51706860	51722879
498	15992	Un	15917177	15933168	unknown	Un	51468661	51484652
514	15921	Un	15934169	15950089	unknown	Un	51741559	51757479
497	15915	Un	15951090	15967004	unknown	Un	51451746	51467660
509	15905	Un	15968005	15983909	unknown	Un	51655187	51671091
619	15890	Un	15984910	16000799	unknown	Un	53378983	53394872
519	15841	Un	16001800	16017640	unknown	Un	51824068	51839908
539	15820	Un	16018641	16034460	unknown	Un	52148960	52164779
499	15786	Un	16035461	16051246	unknown	Un	51485653	51501438
507	15749	Un	16052247	16067995	unknown	Un	51621922	51637670
500	15747	Un	16068996	16084742	unknown	Un	51502439	51518185
502	15731	Un	16085743	16101473	unknown	Un	51537346	51553076
515	15731	Un	16102474	16118204	unknown	Un	51758480	51774210
573	15716	Un	16119205	16134920	unknown	Un	52712384	52728099
503	15651	Un	16135921	16151571	unknown	Un	51554077	51569727
551	15634	Un	16152572	16168205	unknown	Un	52343790	52359423
526	15632	Un	16169206	16184837	unknown	Un	51939363	51954994
504	15598	Un	16185838	16201435	unknown	Un	51570728	51586325
506	15572	Un	16202436	16218007	unknown	Un	51605350	51620921
508	15516	Un	16219008	16234523	unknown	Un	51638671	51654186
520	15499	Un	16235524	16251022	unknown	Un	51840909	51856407
510	15432	Un	16252023	16267454	unknown	Un	51672092	51687523
525	15430	Un	16268455	16283884	unknown	Un	51922933	51938362
535	15317	Un	16284885	16300201	unknown	Un	52084572	52099888
516	15299	Un	16301202	16316500	unknown	Un	51775211	51790509
527	15296	Un	16317501	16332796	unknown	Un	51955995	51971290
532	15293	Un	16333797	16349089	unknown	Un	52036434	52051726
517	15288	Un	16350090	16365377	unknown	Un	51791510	51806797
536	15275	Un	16366378	16381652	unknown	Un	52100889	52116163
518	15270	Un	16382653	16397922	unknown	Un	51807798	51823067
521	15162	Un	16398923	16414084	unknown	Un	51857408	51872569
531	15119	Un	16415085	16430203	unknown	Un	52020315	52035433
618	15103	Un	16431204	16446306	unknown	Un	53362880	53377982
528	15092	Un	16447307	16462398	unknown	Un	51972291	51987382
523	15084	Un	16463399	16478482	unknown	Un	51890778	51905861
524	15071	Un	16479483	16494553	unknown	Un	51906862	51921932
537	15023	Un	16495554	16510576	unknown	Un	52117164	52132186
529	14968	Un	16511577	16526544	unknown	Un	51988383	52003350
530	14964	Un	16527545	16542508	unknown	Un	52004351	52019314
544	14962	Un	16543509	16558470	unknown	Un	52234618	52249579
534	14934	Un	16559471	16574404	unknown	Un	52068638	52083571
533	14911	Un	16575405	16590315	unknown	Un	52052727	52067637
574	14797	Un	16591316	16606112	unknown	Un	52729100	52743896
553	14792	Un	16607113	16621904	unknown	Un	52375981	52390772
538	14773	Un	16622905	16637677	unknown	Un	52133187	52147959
568	14761	Un	16638678	16653438	unknown	Un	52637851	52652611
540	14750	Un	16654439	16669188	unknown	Un	52165780	52180529
542	14746	Un	16670189	16684934	unknown	Un	52201296	52216041
549	14731	Un	16685935	16700665	unknown	Un	52312740	52327470
628	14684	Un	16701666	16716349	unknown	Un	53505456	53520139
545	14636	Un	16717350	16731985	unknown	Un	52250580	52265215
546	14609	Un	16732986	16747594	unknown	Un	52266216	52280824
565	14584	Un	16748595	16763178	unknown	Un	52592282	52606865
552	14557	Un	16764179	16778735	unknown	Un	52360424	52374980
607	14555	Un	16779736	16794290	unknown	Un	53208298	53222852
547	14544	Un	16795291	16809834	unknown	Un	52281825	52296368
577	14443	Un	16810835	16825277	unknown	Un	52774066	52788508
548	14371	Un	16826278	16840648	unknown	Un	52297369	52311739
555	14361	Un	16841649	16856009	unknown	Un	52407082	52421442
558	14324	Un	16857010	16871333	unknown	Un	52483688	52498011
550	14319	Un	16872334	16886652	unknown	Un	52328471	52342789
554	14309	Un	16887653	16901961	unknown	Un	52391773	52406081
738	14295	Un	16902962	16917256	unknown	Un	54920178	54934472
559	14118	Un	16918257	16932374	unknown	Un	52499012	52513129
566	14023	Un	16933375	16947397	unknown	Un	52607866	52621888
556	14013	Un	16948398	16962410	unknown	Un	52422443	52436455
567	13962	Un	16963411	16977372	unknown	Un	52622889	52636850
560	13947	Un	16978373	16992319	unknown	Un	52514130	52528076
602	13934	Un	16993320	17007253	unknown	Un	53136890	53150823
561	13916	Un	17008254	17022169	unknown	Un	52529077	52542992
563	13888	Un	17023170	17037057	unknown	Un	52562525	52576412
578	13876	Un	17038058	17051933	unknown	Un	52789509	52803384
564	13869	Un	17052934	17066802	unknown	Un	52577413	52591281
588	13732	Un	17067803	17081534	unknown	Un	52937647	52951378
569	13703	Un	17082535	17096237	unknown	Un	52653612	52667314
570	13700	Un	17097238	17110937	unknown	Un	52668315	52682014
571	13690	Un	17111938	17125627	unknown	Un	52683015	52696704
584	13680	Un	17126628	17140307	unknown	Un	52879782	52893461
572	13679	Un	17141308	17154986	unknown	Un	52697705	52711383
575	13586	Un	17155987	17169572	unknown	Un	52744897	52758482
650	13586	Un	17170573	17184158	unknown	Un	53802744	53816329
576	13583	Un	17185159	17198741	unknown	Un	52759483	52773065
698	13552	Un	17199742	17213293	unknown	Un	54437498	54451049
587	13456	Un	17214294	17227749	unknown	Un	52923191	52936646
580	13416	Un	17228750	17242165	unknown	Un	52822173	52835588
581	13404	Un	17243166	17256569	unknown	Un	52836589	52849992
667	13404	Un	17257570	17270973	unknown	Un	54028748	54042151
582	13398	Un	17271974	17285371	unknown	Un	52850993	52864390
583	13391	Un	17286372	17299762	unknown	Un	52865391	52878781
779	13391	Un	17300763	17314153	unknown	Un	55389046	55402436
605	13383	Un	17315154	17328536	unknown	Un	53179954	53193336
585	13368	Un	17329537	17342904	unknown	Un	52894462	52907829
586	13361	Un	17343905	17357265	unknown	Un	52908830	52922190
640	13359	Un	17358266	17371624	unknown	Un	53668723	53682081
589	13339	Un	17372625	17385963	unknown	Un	52952379	52965717
593	13332	Un	17386964	17400295	unknown	Un	53009594	53022925
590	13326	Un	17401296	17414621	unknown	Un	52966718	52980043
591	13301	Un	17415622	17428922	unknown	Un	52981044	52994344
664	13272	Un	17429923	17443194	unknown	Un	53988298	54001569
592	13249	Un	17444195	17457443	unknown	Un	52995345	53008593
616	13222	Un	17458444	17471665	unknown	Un	53334934	53348155
594	13213	Un	17472666	17485878	unknown	Un	53023926	53037138
595	13208	Un	17486879	17500086	unknown	Un	53038139	53051346
596	13196	Un	17501087	17514282	unknown	Un	53052347	53065542
599	13152	Un	17515283	17528434	unknown	Un	53094667	53107818
604	13148	Un	17529435	17542582	unknown	Un	53165806	53178953
1536	13110	Un	17543583	17556692	unknown	Un	61362787	61375896
597	13069	Un	17557693	17570761	unknown	Un	53066543	53079611
598	13055	Un	17571762	17584816	unknown	Un	53080612	53093666
600	13039	Un	17585817	17598855	unknown	Un	53108819	53121857
601	13032	Un	17599856	17612887	unknown	Un	53122858	53135889
613	13000	Un	17613888	17626887	unknown	Un	53293363	53306362
603	12982	Un	17627888	17640869	unknown	Un	53151824	53164805
606	12961	Un	17641870	17654830	unknown	Un	53194337	53207297
608	12939	Un	17655831	17668769	unknown	Un	53223853	53236791
609	12925	Un	17669770	17682694	unknown	Un	53237792	53250716
626	12918	Un	17683695	17696612	unknown	Un	53477959	53490876
610	12897	Un	17697613	17710509	unknown	Un	53251717	53264613
611	12890	Un	17711510	17724399	unknown	Un	53265614	53278503
612	12859	Un	17725400	17738258	unknown	Un	53279504	53292362
614	12797	Un	17739259	17752055	unknown	Un	53307363	53320159
771	12779	Un	17753056	17765834	unknown	Un	55297932	55310710
615	12774	Un	17766835	17779608	unknown	Un	53321160	53333933
623	12768	Un	17780609	17793376	unknown	Un	53436914	53449681
617	12724	Un	17794377	17807100	unknown	Un	53349156	53361879
620	12682	Un	17808101	17820782	unknown	Un	53395873	53408554
621	12681	Un	17821783	17834463	unknown	Un	53409555	53422235
622	12678	Un	17835464	17848141	unknown	Un	53423236	53435913
624	12659	Un	17849142	17861800	unknown	Un	53450682	53463340
660	12643	Un	17862801	17875443	unknown	Un	53935591	53948233
625	12618	Un	17876444	17889061	unknown	Un	53464341	53476958
627	12579	Un	17890062	17902640	unknown	Un	53491877	53504455
780	12545	Un	17903641	17916185	unknown	Un	55403437	55415981
629	12539	Un	17917186	17929724	unknown	Un	53521140	53533678
631	12536	Un	17930725	17943260	unknown	Un	53548211	53560746
630	12532	Un	17944261	17956792	unknown	Un	53534679	53547210
682	12468	Un	17957793	17970260	unknown	Un	54236117	54248584
645	12462	Un	17971261	17983722	unknown	Un	53736477	53748938
643	12438	Un	17984723	17997160	unknown	Un	53709683	53722120
632	12429	Un	17998161	18010589	unknown	Un	53561747	53574175
633	12411	Un	18011590	18024000	unknown	Un	53575176	53587586
652	12410	Un	18025001	18037410	unknown	Un	53830463	53842872
634	12402	Un	18038411	18050812	unknown	Un	53588587	53600988
635	12389	Un	18051813	18064201	unknown	Un	53601989	53614377
644	12356	Un	18065202	18077557	unknown	Un	53723121	53735476
636	12352	Un	18078558	18090909	unknown	Un	53615378	53627729
637	12349	Un	18091910	18104258	unknown	Un	53628730	53641078
638	12327	Un	18105259	18117585	unknown	Un	53642079	53654405
639	12317	Un	18118586	18130902	unknown	Un	53655406	53667722
641	12313	Un	18131903	18144215	unknown	Un	53683082	53695394
642	12288	Un	18145216	18157503	unknown	Un	53696395	53708682
669	12265	Un	18158504	18170768	unknown	Un	54055915	54068179
665	12257	Un	18171769	18184025	unknown	Un	54002570	54014826
646	12227	Un	18185026	18197252	unknown	Un	53749939	53762165
647	12225	Un	18198253	18210477	unknown	Un	53763166	53775390
648	12202	Un	18211478	18223679	unknown	Un	53776391	53788592
654	12188	Un	18224680	18236867	unknown	Un	53856989	53869176
685	12174	Un	18237868	18250041	unknown	Un	54275022	54287195
807	12164	Un	18251042	18263205	unknown	Un	55702795	55714958
649	12151	Un	18264206	18276356	unknown	Un	53789593	53801743
659	12142	Un	18277357	18289498	unknown	Un	53922449	53934590
651	12133	Un	18290499	18302631	unknown	Un	53817330	53829462
653	12116	Un	18303632	18315747	unknown	Un	53843873	53855988
873	12105	Un	18316748	18328852	unknown	Un	56427819	56439923
655	12085	Un	18329853	18341937	unknown	Un	53870177	53882261
656	12070	Un	18342938	18355007	unknown	Un	53883262	53895331
657	12065	Un	18356008	18368072	unknown	Un	53896332	53908396
658	12052	Un	18369073	18381124	unknown	Un	53909397	53921448
661	12028	Un	18382125	18394152	unknown	Un	53949234	53961261
662	12019	Un	18395153	18407171	unknown	Un	53962262	53974280
663	12017	Un	18408172	18420188	unknown	Un	53975281	53987297
703	11964	Un	18421189	18433152	unknown	Un	54502086	54514049
684	11932	Un	18434153	18446084	unknown	Un	54262090	54274021
700	11923	Un	18447085	18459007	unknown	Un	54464297	54476219
666	11921	Un	18460008	18471928	unknown	Un	54015827	54027747
668	11763	Un	18472929	18484691	unknown	Un	54043152	54054914
670	11722	Un	18485692	18497413	unknown	Un	54069180	54080901
734	11698	Un	18498414	18510111	unknown	Un	54872246	54883943
692	11697	Un	18511112	18522808	unknown	Un	54363033	54374729
884	11686	Un	18523809	18535494	unknown	Un	56539298	56550983
671	11683	Un	18536495	18548177	unknown	Un	54081902	54093584
686	11680	Un	18549178	18560857	unknown	Un	54288196	54299875
673	11660	Un	18561858	18573517	unknown	Un	54135189	54146848
674	11639	Un	18574518	18586156	unknown	Un	54147849	54159487
675	11631	Un	18587157	18598787	unknown	Un	54160488	54172118
676	11629	Un	18599788	18611416	unknown	13	20071502	20083130
677	11626	Un	18612417	18624042	unknown	Un	54173119	54184744
678	11623	Un	18625043	18636665	unknown	Un	54185745	54197367
679	11622	Un	18637666	18649287	unknown	Un	54198368	54209989
701	11606	Un	18650288	18661893	unknown	Un	54477220	54488825
680	11578	Un	18662894	18674471	unknown	Un	54210990	54222567
687	11569	Un	18675472	18687040	unknown	Un	54300876	54312444
681	11549	Un	18688041	18699589	unknown	Un	54223568	54235116
683	11505	Un	18700590	18712094	unknown	Un	54249585	54261089
693	11505	Un	18713095	18724599	unknown	Un	54375730	54387234
688	11446	Un	18725600	18737045	unknown	Un	54313445	54324890
689	11438	Un	18738046	18749483	unknown	Un	54325891	54337328
696	11404	Un	18750484	18761887	unknown	Un	54412832	54424235
971	11397	Un	18762888	18774284	unknown	Un	57347275	57358671
690	11360	Un	18775285	18786644	unknown	Un	54338329	54349688
691	11344	Un	18787645	18798988	unknown	Un	54350689	54362032
694	11307	Un	18799989	18811295	unknown	Un	54388235	54399541
695	11290	Un	18812296	18823585	unknown	Un	54400542	54411831
697	11262	Un	18824586	18835847	unknown	Un	54425236	54436497
702	11260	Un	18836848	18848107	unknown	Un	54489826	54501085
1003	11251	Un	18849108	18860358	unknown	Un	57637753	57649003
699	11247	Un	18861359	18872605	unknown	Un	54452050	54463296
809	11237	Un	18873606	18884842	unknown	Un	55760221	55771457
818	11227	Un	18885843	18897069	unknown	Un	55860316	55871542
704	11145	Un	18898070	18909214	unknown	Un	54515050	54526194
706	11134	Un	18910215	18921348	unknown	Un	54539260	54550393
787	11131	Un	18922349	18933479	unknown	Un	55482339	55493469
752	11086	Un	18934480	18945565	unknown	Un	55085013	55096098
795	11078	Un	18946566	18957643	unknown	Un	55571561	55582638
705	11065	Un	18958644	18969708	unknown	Un	54527195	54538259
707	11016	Un	18970709	18981724	unknown	Un	54551394	54562409
708	11004	Un	18982725	18993728	unknown	Un	54563410	54574413
709	11001	Un	18994729	19005729	unknown	Un	54575414	54586414
710	10985	Un	19006730	19017714	unknown	Un	54587415	54598399
735	10985	Un	19018715	19029699	unknown	Un	54884944	54895928
711	10982	Un	19030700	19041681	unknown	Un	54599400	54610381
719	10976	Un	19042682	19053657	unknown	Un	54695003	54705978
712	10971	Un	19054658	19065628	unknown	Un	54611382	54622352
731	10966	Un	19066629	19077594	unknown	Un	54836822	54847787
713	10962	Un	19078595	19089556	unknown	Un	54623353	54634314
714	10962	Un	19090557	19101518	unknown	Un	54635315	54646276
715	10955	Un	19102519	19113473	unknown	Un	54647277	54658231
816	10948	Un	19114474	19125421	unknown	Un	55837887	55848834
716	10934	Un	19126422	19137355	unknown	Un	54659232	54670165
717	10925	Un	19138356	19149280	unknown	Un	54671166	54682090
724	10918	Un	19150281	19161198	unknown	Un	54754349	54765266
743	10915	Un	19162199	19173113	unknown	Un	54981781	54992695
718	10912	Un	19174114	19185025	unknown	Un	54683091	54694002
992	10906	Un	19186026	19196931	unknown	Un	57538156	57549061
720	10864	Un	19197932	19208795	unknown	Un	54706979	54717842
728	10845	Un	19209796	19220640	unknown	Un	54801561	54812405
721	10844	Un	19221641	19232484	unknown	Un	54718843	54729686
722	10837	Un	19233485	19244321	unknown	Un	54730687	54741523
723	10825	Un	19245322	19256146	unknown	Un	54742524	54753348
869	10815	Un	19257147	19267961	unknown	Un	56386130	56396944
841	10810	Un	19268962	19279771	unknown	Un	56101694	56112503
733	10772	Un	19280772	19291543	unknown	Un	54860474	54871245
725	10771	Un	19292544	19303314	unknown	Un	54766267	54777037
726	10763	Un	19304315	19315077	unknown	Un	54778038	54788800
727	10760	Un	19316078	19326837	unknown	Un	54789801	54800560
796	10740	Un	19327838	19338577	unknown	Un	55583639	55594378
729	10711	Un	19339578	19350288	unknown	Un	54813406	54824116
730	10705	Un	19351289	19361993	unknown	Un	54825117	54835821
732	10686	Un	19362994	19373679	unknown	Un	54848788	54859473
741	10672	Un	19374680	19385351	unknown	Un	54958635	54969306
902	10654	Un	19386352	19397005	unknown	Un	56715000	56725653
736	10632	Un	19398006	19408637	unknown	Un	54896929	54907560
811	10630	Un	19409638	19420267	unknown	Un	55783008	55793637
737	10617	Un	19421268	19431884	unknown	Un	54908561	54919177
788	10615	Un	19432885	19443499	unknown	Un	55494470	55505084
739	10584	Un	19444500	19455083	unknown	Un	54935473	54946056
740	10578	Un	19456084	19466661	unknown	Un	54947057	54957634
799	10524	Un	19467662	19478185	unknown	Un	55616678	55627201
749	10519	Un	19479186	19489704	unknown	Un	55050816	55061334
755	10488	Un	19490705	19501192	unknown	Un	55119703	55130190
742	10474	Un	19502193	19512666	unknown	Un	54970307	54980780
744	10471	Un	19513667	19524137	unknown	Un	54993696	55004166
745	10438	Un	19525138	19535575	unknown	Un	55005167	55015604
746	10434	Un	19536576	19547009	unknown	Un	55016605	55027038
747	10393	Un	19548010	19558402	unknown	Un	55028039	55038431
748	10384	Un	19559403	19569786	unknown	Un	55039432	55049815
815	10361	Un	19570787	19581147	unknown	Un	55826526	55836886
750	10342	Un	19582148	19592489	unknown	Un	55062335	55072676
751	10336	Un	19593490	19603825	unknown	Un	55073677	55084012
753	10304	Un	19604826	19615129	unknown	Un	55097099	55107402
754	10300	Un	19616130	19626429	unknown	Un	55108403	55118702
773	10254	Un	19627430	19637683	unknown	Un	55322720	55332973
756	10247	Un	19638684	19648930	unknown	Un	55131191	55141437
757	10208	Un	19649931	19660138	unknown	Un	55142438	55152645
758	10201	Un	19661139	19671339	unknown	Un	55153646	55163846
792	10195	Un	19672340	19682534	unknown	Un	55538936	55549130
759	10187	Un	19683535	19693721	unknown	Un	55164847	55175033
909	10186	Un	19694722	19704907	unknown	Un	56784133	56794318
760	10150	Un	19705908	19716057	unknown	Un	55176034	55186183
761	10144	Un	19717058	19727201	unknown	Un	55187184	55197327
776	10133	Un	19728202	19738334	unknown	Un	55355937	55366069
762	10128	Un	19739335	19749462	unknown	Un	55198328	55208455
960	10119	Un	19750463	19760581	unknown	Un	57255761	57265879
789	10117	Un	19761582	19771698	unknown	Un	55506085	55516201
763	10105	Un	19772699	19782803	unknown	Un	55209456	55219560
764	10089	Un	19783804	19793892	unknown	Un	55220561	55230649
765	10070	Un	19794893	19804962	unknown	Un	55231650	55241719
766	10062	Un	19805963	19816024	unknown	Un	55242720	55252781
767	10054	Un	19817025	19827078	unknown	Un	55253782	55263835
777	10053	Un	19828079	19838131	unknown	Un	55367070	55377122
836	10045	Un	19839132	19849176	unknown	Un	56049831	56059875
768	10038	Un	19850177	19860214	unknown	Un	55264836	55274873
769	10029	Un	19861215	19871243	unknown	Un	55275874	55285902
770	10029	Un	19872244	19882272	unknown	Un	55286903	55296931
772	10009	Un	19883273	19893281	unknown	Un	55311711	55321719
786	9999	Un	19894282	19904280	unknown	Un	55471340	55481338
774	9987	Un	19905281	19915267	unknown	Un	55333974	55343960
791	9984	Un	19916268	19926251	unknown	Un	55527952	55537935
775	9976	Un	19927252	19937227	unknown	Un	55344961	55354936
781	9961	Un	19938228	19948188	unknown	Un	55416982	55426942
824	9957	Un	19949189	19959145	unknown	Un	55924806	55934762
783	9937	Un	19960146	19970082	unknown	Un	55438784	55448720
802	9935	Un	19971083	19981017	unknown	Un	55649479	55659413
778	9923	Un	19982018	19991940	unknown	Un	55378123	55388045
855	9893	Un	19992941	20002833	unknown	Un	56245498	56255390
782	9841	Un	20003834	20013674	unknown	Un	55427943	55437783
813	9840	Un	20014675	20024514	unknown	Un	55805184	55815023
784	9814	Un	20025515	20035328	unknown	Un	55449721	55459534
785	9805	Un	20036329	20046133	unknown	Un	55460535	55470339
790	9750	Un	20047134	20056883	unknown	Un	55517202	55526951
793	9715	Un	20057884	20067598	unknown	Un	55550131	55559845
794	9715	Un	20068599	20078313	unknown	Un	55560846	55570560
797	9659	Un	20079314	20088972	unknown	Un	55595379	55605037
854	9657	Un	20089973	20099629	unknown	Un	56234841	56244497
798	9640	Un	20100630	20110269	unknown	Un	55606038	55615677
800	9639	Un	20111270	20120908	unknown	Un	55628202	55637840
801	9638	Un	20121909	20131546	unknown	Un	55638841	55648478
803	9612	Un	20132547	20142158	unknown	Un	55660414	55670025
804	9603	Un	20143159	20152761	unknown	Un	55671026	55680628
805	9587	Un	20153762	20163348	unknown	Un	55681629	55691215
806	9579	Un	20164349	20173927	unknown	Un	55692216	55701794
810	9550	Un	20174928	20184477	unknown	Un	55772458	55782007
812	9546	Un	20185478	20195023	unknown	Un	55794638	55804183
832	9526	Un	20196024	20205549	unknown	Un	56008438	56017963
814	9502	Un	20206550	20216051	unknown	Un	55816024	55825525
817	9481	Un	20217052	20226532	unknown	Un	55849835	55859315
819	9468	Un	20227533	20237000	unknown	Un	55872543	55882010
820	9455	Un	20238001	20247455	unknown	Un	55883011	55892465
821	9454	Un	20248456	20257909	unknown	Un	55893466	55902919
822	9445	Un	20258910	20268354	unknown	Un	55903920	55913364
823	9441	Un	20269355	20278795	unknown	Un	55914365	55923805
825	9425	Un	20279796	20289220	unknown	Un	55935763	55945187
826	9400	Un	20290221	20299620	unknown	Un	55946188	55955587
856	9399	Un	20300621	20310019	unknown	Un	56256391	56265789
827	9391	Un	20311020	20320410	unknown	Un	55956588	55965978
828	9389	Un	20321411	20330799	unknown	Un	55966979	55976367
976	9372	Un	20331800	20341171	unknown	Un	57396224	57405595
829	9366	Un	20342172	20351537	unknown	Un	55977368	55986733
830	9359	Un	20352538	20361896	unknown	Un	55987734	55997092
831	9345	Un	20362897	20372241	unknown	Un	55998093	56007437
833	9314	Un	20373242	20382555	unknown	Un	56018964	56028277
834	9280	Un	20383556	20392835	unknown	Un	56029278	56038557
835	9273	Un	20393836	20403108	unknown	Un	56039558	56048830
837	9250	Un	20404109	20413358	unknown	Un	56060876	56070125
846	9249	Un	20414359	20423607	unknown	Un	56154086	56163334
838	9218	Un	20424608	20433825	unknown	Un	56071126	56080343
839	9195	Un	20434826	20444020	unknown	Un	56081344	56090538
845	9188	Un	20445021	20454208	unknown	Un	56143898	56153085
848	9158	Un	20455209	20464366	unknown	Un	56174399	56183556
840	9155	Un	20465367	20474521	unknown	Un	56091539	56100693
842	9138	Un	20475522	20484659	unknown	Un	56113504	56122641
871	9133	Un	20485660	20494792	unknown	Un	56407823	56416955
843	9132	Un	20495793	20504924	unknown	Un	56123642	56132773
874	9126	Un	20505925	20515050	unknown	Un	56440924	56450049
844	9124	Un	20516051	20525174	unknown	Un	56133774	56142897
853	9124	Un	20526175	20535298	unknown	Un	56224717	56233840
993	9105	Un	20536299	20545403	unknown	Un	57550062	57559166
1024	9073	Un	20546404	20555476	unknown	Un	57822465	57831537
847	9064	Un	20556477	20565540	unknown	Un	56164335	56173398
849	9050	Un	20566541	20575590	unknown	Un	56184557	56193606
850	9044	Un	20576591	20585634	unknown	Un	56194607	56203650
1184	9039	Un	20586635	20595673	unknown	Un	59094778	59103816
851	9036	Un	20596674	20605709	unknown	Un	56204651	56213686
852	9030	Un	20606710	20615739	unknown	Un	56214687	56223716
880	8993	Un	20616740	20625732	unknown	Un	56500073	56509065
857	8983	Un	20626733	20635715	unknown	Un	56266790	56275772
858	8980	Un	20636716	20645695	unknown	Un	56276773	56285752
859	8966	Un	20646696	20655661	unknown	Un	56286753	56295718
860	8965	Un	20656662	20665626	unknown	Un	56296719	56305683
1691	8963	Un	20666627	20675589	unknown	Un	62108744	62117706
1010	8962	Un	20676590	20685551	unknown	Un	57701289	57710250
861	8961	Un	20686552	20695512	unknown	Un	56306684	56315644
862	8954	Un	20696513	20705466	unknown	Un	56316645	56325598
863	8947	Un	20706467	20715413	unknown	Un	56326599	56335545
907	8934	Un	20716414	20725347	unknown	Un	56764765	56773698
864	8925	Un	20726348	20735272	unknown	Un	56336546	56345470
865	8921	Un	20736273	20745193	unknown	Un	56346471	56355391
866	8921	Un	20746194	20755114	unknown	Un	56356392	56365312
867	8919	Un	20756115	20765033	unknown	Un	56366313	56375231
868	8898	Un	20766034	20774931	unknown	Un	56376232	56385129
870	8878	Un	20775932	20784809	unknown	Un	56397945	56406822
872	8863	Un	20785810	20794672	unknown	Un	56417956	56426818
879	8857	Un	20795673	20804529	unknown	Un	56490216	56499072
875	8818	Un	20805530	20814347	unknown	Un	56451050	56459867
876	8803	Un	20815348	20824150	unknown	Un	56460868	56469670
883	8794	Un	20825151	20833944	unknown	Un	56529504	56538297
877	8779	Un	20834945	20843723	unknown	Un	56470671	56479449
878	8766	Un	20844724	20853489	unknown	Un	56480450	56489215
905	8735	Un	20854490	20863224	unknown	Un	56745580	56754314
881	8728	Un	20864225	20872952	unknown	Un	56510066	56518793
896	8724	Un	20873953	20882676	unknown	Un	56657689	56666412
882	8710	Un	20883677	20892386	unknown	Un	56519794	56528503
910	8673	Un	20893387	20902059	unknown	Un	56795319	56803991
885	8672	Un	20903060	20911731	unknown	Un	56551984	56560655
886	8656	Un	20912732	20921387	unknown	Un	56561656	56570311
887	8640	Un	20922388	20931027	unknown	Un	56571312	56579951
888	8618	Un	20932028	20940645	unknown	Un	56580952	56589569
889	8618	Un	20941646	20950263	unknown	Un	56590570	56599187
890	8611	Un	20951264	20959874	unknown	Un	56600188	56608798
891	8608	Un	20960875	20969482	unknown	Un	56609799	56618406
892	8591	Un	20970483	20979073	unknown	Un	56619407	56627997
893	8583	Un	20980074	20988656	unknown	Un	56628998	56637580
914	8565	Un	20989657	20998221	unknown	Un	56833225	56841789
894	8562	Un	20999222	21007783	unknown	Un	56638581	56647142
895	8546	Un	21008784	21017329	unknown	Un	56648143	56656688
897	8543	Un	21018330	21026872	unknown	Un	56667413	56675955
898	8541	Un	21027873	21036413	unknown	Un	56676956	56685496
1068	8521	Un	21037414	21045934	unknown	Un	58190097	58198617
899	8517	Un	21046935	21055451	unknown	Un	56686497	56695013
900	8510	Un	21056452	21064961	unknown	Un	56696014	56704523
973	8484	Un	21065962	21074445	unknown	Un	57368534	57377017
1636	8481	Un	21075446	21083926	unknown	Un	61896128	61904608
901	8476	Un	21084927	21093402	unknown	Un	56705524	56713999
903	8471	Un	21094403	21102873	unknown	Un	56726654	56735124
904	8455	Un	21103874	21112328	unknown	Un	56736125	56744579
906	8450	Un	21113329	21121778	unknown	Un	56755315	56763764
908	8434	Un	21122779	21131212	unknown	Un	56774699	56783132
924	8423	Un	21132213	21140635	unknown	Un	56926717	56935139
911	8416	Un	21141636	21150051	unknown	Un	56804992	56813407
912	8415	Un	21151052	21159466	unknown	Un	56814408	56822822
918	8414	Un	21160467	21168880	unknown	Un	56870807	56879220
913	8402	Un	21169881	21178282	unknown	Un	56823823	56832224
949	8385	Un	21179283	21187667	unknown	Un	57156227	57164611
927	8384	Un	21188668	21197051	unknown	Un	56954671	56963054
932	8384	Un	21198052	21206435	unknown	Un	57000762	57009145
920	8375	Un	21207436	21215810	unknown	Un	56889512	56897886
915	8371	Un	21216811	21225181	unknown	Un	56842790	56851160
921	8357	Un	21226182	21234538	unknown	Un	56898887	56907243
974	8356	Un	21235539	21243894	unknown	Un	57378018	57386373
1013	8338	Un	21244895	21253232	unknown	Un	57728242	57736579
916	8331	Un	21254233	21262563	unknown	Un	56852161	56860491
925	8317	Un	21263564	21271880	unknown	Un	56936140	56944456
917	8315	Un	21272881	21281195	unknown	Un	56861492	56869806
1209	8296	Un	21282196	21290491	unknown	Un	59280317	59288612
919	8291	Un	21291492	21299782	unknown	Un	56880221	56888511
922	8247	Un	21300783	21309029	unknown	Un	56908244	56916490
923	8226	Un	21310030	21318255	unknown	Un	56917491	56925716
926	8214	Un	21319256	21327469	unknown	Un	56945457	56953670
928	8191	Un	21328470	21336660	unknown	Un	56964055	56972245
945	8191	Un	21337661	21345851	unknown	Un	57119740	57127930
929	8187	Un	21346852	21355038	unknown	Un	56973246	56981432
946	8177	Un	21356039	21364215	unknown	Un	57128931	57137107
930	8167	Un	21365216	21373382	unknown	Un	56982433	56990599
958	8164	Un	21374383	21382546	unknown	Un	57237668	57245831
931	8162	Un	21383547	21391708	unknown	Un	56991600	56999761
933	8158	Un	21392709	21400866	unknown	Un	57010146	57018303
934	8149	Un	21401867	21410015	unknown	Un	57019304	57027452
1139	8147	Un	21411016	21419162	unknown	Un	58758373	58766519
935	8144	Un	21420163	21428306	unknown	Un	57028453	57036596
1103	8144	Un	21429307	21437450	unknown	Un	58475220	58483363
936	8142	Un	21438451	21446592	unknown	Un	57037597	57045738
937	8141	Un	21447593	21455733	unknown	Un	57046739	57054879
938	8140	Un	21456734	21464873	unknown	Un	57055880	57064019
939	8139	Un	21465874	21474012	unknown	Un	57065020	57073158
940	8135	Un	21475013	21483147	unknown	Un	57074159	57082293
941	8125	Un	21484148	21492272	unknown	Un	57083294	57091418
942	8114	Un	21493273	21501386	unknown	Un	57092419	57100532
943	8108	Un	21502387	21510494	unknown	Un	57101533	57109640
1134	8108	Un	21511495	21519602	unknown	Un	58718566	58726673
944	8099	Un	21520603	21528701	unknown	Un	57110641	57118739
947	8066	Un	21529702	21537767	unknown	Un	57138108	57146173
948	8053	Un	21538768	21546820	unknown	Un	57147174	57155226
966	8049	Un	21547821	21555869	unknown	Un	57311454	57319502
950	8047	Un	21556870	21564916	unknown	Un	57165612	57173658
951	8037	Un	21565917	21573953	unknown	Un	57174659	57182695
982	8018	Un	21574954	21582971	unknown	Un	57450848	57458865
952	8016	Un	21583972	21591987	unknown	Un	57183696	57191711
953	8015	Un	21592988	21601002	unknown	Un	57192712	57200726
954	8008	Un	21602003	21610010	unknown	Un	57201727	57209734
967	7998	Un	21611011	21619008	unknown	Un	57320503	57328500
955	7992	Un	21620009	21628000	unknown	Un	57210735	57218726
956	7982	Un	21629001	21636982	unknown	Un	57219727	57227708
1573	7967	Un	21637983	21645949	unknown	Un	61577400	61585366
957	7959	Un	21646950	21654908	unknown	Un	57228709	57236667
1017	7941	Un	21655909	21663849	unknown	Un	57762967	57770907
959	7929	Un	21664850	21672778	unknown	Un	57246832	57254760
961	7921	Un	21673779	21681699	unknown	Un	57266880	57274800
962	7919	Un	21682700	21690618	unknown	Un	57275801	57283719
963	7914	Un	21691619	21699532	unknown	Un	57284720	57292633
964	7911	Un	21700533	21708443	unknown	Un	57293634	57301544
965	7909	Un	21709444	21717352	unknown	Un	57302545	57310453
1382	7893	Un	21718353	21726245	unknown	Un	60438368	60446260
968	7892	Un	21727246	21735137	unknown	15	16190873	16198764
969	7889	Un	21736138	21744026	unknown	Un	57329501	57337389
980	7886	Un	21745027	21752912	unknown	Un	57433078	57440963
970	7885	Un	21753913	21761797	unknown	Un	57338390	57346274
981	7884	Un	21762798	21770681	unknown	Un	57441964	57449847
972	7862	Un	21771682	21779543	unknown	Un	57359672	57367533
975	7850	Un	21780544	21788393	unknown	Un	57387374	57395223
977	7836	Un	21789394	21797229	unknown	Un	57406596	57414431
983	7831	Un	21798230	21806060	unknown	Un	57459866	57467696
978	7828	Un	21807061	21814888	unknown	Un	57415432	57423259
979	7818	Un	21815889	21823706	unknown	Un	57424260	57432077
1187	7766	Un	21824707	21832472	unknown	Un	59120519	59128284
1248	7734	Un	21833473	21841206	unknown	Un	59555434	59563167
984	7724	Un	21842207	21849930	unknown	Un	57468697	57476420
985	7720	Un	21850931	21858650	unknown	Un	57477421	57485140
986	7704	Un	21859651	21867354	unknown	Un	57486141	57493844
987	7672	Un	21868355	21876026	unknown	Un	57494845	57502516
988	7669	Un	21877027	21884695	unknown	Un	57503517	57511185
1082	7669	Un	21885696	21893364	unknown	Un	58305532	58313200
989	7658	Un	21894365	21902022	unknown	Un	57512186	57519843
990	7656	Un	21903023	21910678	unknown	Un	57520844	57528499
991	7656	Un	21911679	21919334	unknown	Un	57529500	57537155
994	7652	Un	21920335	21927986	unknown	Un	57560167	57567818
995	7649	Un	21928987	21936635	unknown	Un	57568819	57576467
996	7636	Un	21937636	21945271	unknown	Un	57577468	57585103
997	7631	Un	21946272	21953902	unknown	Un	57586104	57593734
1044	7626	Un	21954903	21962528	unknown	Un	57991706	57999331
998	7625	Un	21963529	21971153	unknown	Un	57594735	57602359
1100	7615	Un	21972154	21979768	unknown	Un	58450843	58458457
999	7603	Un	21980769	21988371	unknown	Un	57603360	57610962
1000	7599	Un	21989372	21996970	unknown	Un	57611963	57619561
1001	7597	Un	21997971	22005567	unknown	Un	57620562	57628158
1002	7594	Un	22006568	22014161	unknown	Un	57629159	57636752
1004	7579	Un	22015162	22022740	unknown	Un	57650004	57657582
1005	7567	Un	22023741	22031307	unknown	Un	57658583	57666149
1006	7544	Un	22032308	22039851	unknown	Un	57667150	57674693
1007	7539	Un	22040852	22048390	unknown	Un	57675694	57683232
1008	7537	Un	22049391	22056927	unknown	Un	57684233	57691769
1026	7536	Un	22057928	22065463	unknown	Un	57841040	57848575
1009	7519	Un	22066464	22073982	unknown	Un	57692770	57700288
1658	7515	Un	22074983	22082497	unknown	Un	61995626	62003140
1083	7510	Un	22083498	22091007	unknown	Un	58314201	58321710
1011	7508	Un	22092008	22099515	unknown	Un	57711251	57718758
1186	7508	Un	22100516	22108023	unknown	Un	59112011	59119518
1025	7502	Un	22109024	22116525	unknown	Un	57832538	57840039
1027	7492	Un	22117526	22125017	unknown	Un	57849576	57857067
1028	7484	Un	22126018	22133501	unknown	Un	57858068	57865551
1012	7483	Un	22134502	22141984	unknown	Un	57719759	57727241
1077	7470	Un	22142985	22150454	unknown	Un	58264763	58272232
1014	7465	Un	22151455	22158919	unknown	Un	57737580	57745044
1015	7462	Un	22159920	22167381	unknown	Un	57746045	57753506
1016	7460	Un	22168382	22175841	unknown	Un	57754507	57761966
1065	7446	Un	22176842	22184287	unknown	Un	58165278	58172723
1018	7440	Un	22185288	22192727	unknown	Un	57771908	57779347
1019	7438	Un	22193728	22201165	unknown	Un	57780348	57787785
1020	7425	Un	22202166	22209590	unknown	Un	57788786	57796210
1021	7424	Un	22210591	22218014	unknown	Un	57797211	57804634
1022	7424	Un	22219015	22226438	unknown	Un	57805635	57813058
1113	7407	Un	22227439	22234845	unknown	Un	58555306	58562712
1023	7406	Un	22235846	22243251	unknown	Un	57814059	57821464
1042	7400	Un	22244252	22251651	unknown	Un	57975007	57982406
1029	7371	Un	22252652	22260022	unknown	Un	57866552	57873922
1030	7371	Un	22261023	22268393	unknown	Un	57874923	57882293
1121	7369	Un	22269394	22276762	unknown	Un	58618390	58625758
1031	7365	Un	22277763	22285127	unknown	Un	57883294	57890658
1032	7363	Un	22286128	22293490	unknown	Un	57891659	57899021
1033	7357	Un	22294491	22301847	unknown	Un	57900022	57907378
1034	7357	Un	22302848	22310204	unknown	Un	57908379	57915735
1035	7353	Un	22311205	22318557	unknown	Un	57916736	57924088
1036	7341	Un	22319558	22326898	unknown	Un	57925089	57932429
1037	7339	Un	22327899	22335237	unknown	Un	57933430	57940768
1246	7326	Un	22336238	22343563	unknown	Un	59540351	59547676
1038	7318	Un	22344564	22351881	unknown	Un	57941769	57949086
1039	7317	Un	22352882	22360198	unknown	Un	57950087	57957403
1057	7317	Un	22361199	22368515	unknown	Un	58099449	58106765
1059	7305	Un	22369516	22376820	unknown	Un	58115973	58123277
1040	7302	Un	22377821	22385122	unknown	Un	57958404	57965705
1041	7301	Un	22386123	22393423	unknown	Un	57966706	57974006
1043	7299	Un	22394424	22401722	unknown	Un	57983407	57990705
1045	7298	Un	22402723	22410020	unknown	Un	58000332	58007629
1094	7282	Un	22411021	22418302	unknown	Un	58402922	58410203
1046	7280	Un	22419303	22426582	unknown	Un	58008630	58015909
1047	7272	Un	22427583	22434854	unknown	Un	58016910	58024181
1048	7270	Un	22435855	22443124	unknown	Un	58025182	58032451
1049	7266	Un	22444125	22451390	unknown	Un	58033452	58040717
1050	7263	Un	22452391	22459653	unknown	Un	58041718	58048980
1051	7261	Un	22460654	22467914	unknown	Un	58049981	58057241
1052	7258	Un	22468915	22476172	unknown	Un	58058242	58065499
1053	7253	Un	22477173	22484425	unknown	Un	58066500	58073752
1054	7243	Un	22485426	22492668	unknown	Un	58074753	58081995
1055	7234	Un	22493669	22500902	unknown	Un	58082996	58090229
1056	7219	Un	22501903	22509121	unknown	Un	58091230	58098448
1058	7207	Un	22510122	22517328	unknown	Un	58107766	58114972
1075	7204	Un	22518329	22525532	unknown	Un	58248464	58255667
1060	7203	Un	22526533	22533735	unknown	Un	58124278	58131480
1061	7203	Un	22534736	22541938	unknown	Un	58132481	58139683
1062	7200	Un	22542939	22550138	unknown	Un	58140684	58147883
1063	7197	Un	22551139	22558335	unknown	Un	58148884	58156080
1064	7197	Un	22559336	22566532	unknown	Un	58157081	58164277
1066	7189	Un	22567533	22574721	unknown	Un	58173724	58180912
1067	7184	Un	22575722	22582905	unknown	Un	58181913	58189096
1069	7167	Un	22583906	22591072	unknown	Un	58199618	58206784
1070	7158	Un	22592073	22599230	unknown	Un	58207785	58214942
1105	7156	Un	22600231	22607386	unknown	Un	58492210	58499365
1071	7143	Un	22608387	22615529	unknown	Un	58215943	58223085
1072	7137	Un	22616530	22623666	unknown	Un	58224086	58231222
1073	7128	Un	22624667	22631794	unknown	Un	58232223	58239350
1074	7113	Un	22632795	22639907	unknown	Un	58240351	58247463
1089	7113	Un	22640908	22648020	unknown	Un	58362852	58369964
1076	7095	Un	22649021	22656115	unknown	Un	58256668	58263762
1078	7091	Un	22657116	22664206	unknown	Un	58273233	58280323
1079	7085	Un	22665207	22672291	unknown	Un	58281324	58288408
1291	7078	Un	22673292	22680369	unknown	Un	59849993	59857070
1080	7068	Un	22681370	22688437	unknown	Un	58289409	58296476
1081	7055	Un	22689438	22696492	unknown	Un	58297477	58304531
1084	7039	Un	22697493	22704531	unknown	Un	58322711	58329749
1085	7037	Un	22705532	22712568	unknown	Un	58330750	58337786
1086	7025	Un	22713569	22720593	unknown	Un	58338787	58345811
1087	7022	Un	22721594	22728615	unknown	Un	58346812	58353833
1088	7018	Un	22729616	22736633	unknown	Un	58354834	58361851
1090	7010	Un	22737634	22744643	unknown	Un	58370965	58377974
1091	6998	Un	22745644	22752641	unknown	Un	58378975	58385972
1092	6989	Un	22753642	22760630	unknown	Un	58386973	58393961
1120	6970	Un	22761631	22768600	unknown	Un	58610420	58617389
1093	6960	Un	22769601	22776560	unknown	Un	58394962	58401921
1095	6939	Un	22777561	22784499	unknown	Un	58411204	58418142
1096	6936	Un	22785500	22792435	unknown	Un	58419143	58426078
1110	6932	Un	22793436	22800367	unknown	Un	58531778	58538709
1097	6931	Un	22801368	22808298	unknown	Un	58427079	58434009
1098	6918	Un	22809299	22816216	unknown	Un	58435010	58441927
1109	6916	Un	22817217	22824132	unknown	Un	58523862	58530777
1099	6915	Un	22825133	22832047	unknown	Un	58442928	58449842
1101	6903	Un	22833048	22839950	unknown	Un	58459458	58466360
1119	6901	Un	22840951	22847851	unknown	Un	58602519	58609419
1201	6871	Un	22848852	22855722	unknown	Un	59222771	59229641
1172	6865	Un	22856723	22863587	unknown	Un	59005988	59012852
1102	6859	Un	22864588	22871446	unknown	Un	58467361	58474219
1135	6859	Un	22872447	22879305	unknown	Un	58727674	58734532
1104	6846	Un	22880306	22887151	unknown	Un	58484364	58491209
1106	6837	Un	22888152	22894988	unknown	Un	58500366	58507202
1107	6835	Un	22895989	22902823	unknown	Un	58508203	58515037
1117	6828	Un	22903824	22910651	unknown	Un	58586984	58593811
1165	6826	Un	22911652	22918477	unknown	Un	58953876	58960701
1108	6824	Un	22919478	22926301	unknown	Un	58516038	58522861
1111	6802	Un	22927302	22934103	unknown	Un	58539710	58546511
1112	6794	Un	22935104	22941897	unknown	Un	58547512	58554305
1174	6792	Un	22942898	22949689	unknown	Un	59021156	59027947
1159	6788	Un	22950690	22957477	unknown	Un	58909175	58915962
1114	6776	Un	22958478	22965253	unknown	Un	58563713	58570488
1115	6759	Un	22966254	22973012	unknown	Un	58571489	58578247
1125	6756	Un	22974013	22980768	unknown	Un	58649770	58656525
1116	6736	Un	22981769	22988504	unknown	Un	58579248	58585983
1129	6710	Un	22989505	22996214	unknown	Un	58680395	58687104
1118	6707	Un	22997215	23003921	unknown	Un	58594812	58601518
1169	6707	Un	23004922	23011628	unknown	Un	58983670	58990376
1131	6701	Un	23012629	23019329	unknown	Un	58695711	58702411
1147	6689	Un	23020330	23027018	unknown	Un	58819849	58826537
1122	6675	Un	23028019	23034693	unknown	Un	58626759	58633433
1123	6672	Un	23035694	23042365	unknown	Un	58634434	58641105
1136	6668	Un	23043366	23050033	unknown	Un	58735533	58742200
1296	6668	Un	23051034	23057701	unknown	Un	59884438	59891105
1124	6664	Un	23058702	23065365	unknown	Un	58642106	58648769
1126	6645	Un	23066366	23073010	unknown	Un	58657526	58664170
1257	6641	Un	23074011	23080651	unknown	Un	59618549	59625189
1138	6620	Un	23081652	23088271	unknown	Un	58750753	58757372
1127	6613	Un	23089272	23095884	unknown	Un	58665171	58671783
1128	6611	Un	23096885	23103495	unknown	Un	58672784	58679394
1130	6606	Un	23104496	23111101	unknown	Un	58688105	58694710
1177	6584	Un	23112102	23118685	unknown	Un	59043526	59050109
1132	6580	Un	23119686	23126265	unknown	Un	58703412	58709991
1133	6574	Un	23127266	23133839	unknown	Un	58710992	58717565
1137	6552	Un	23134840	23141391	unknown	Un	58743201	58749752
1161	6543	Un	23142392	23148934	unknown	Un	58924328	58930870
1308	6532	Un	23149935	23156466	unknown	Un	59965906	59972437
1312	6504	Un	23157467	23163970	unknown	Un	59992906	59999409
1140	6491	Un	23164971	23171461	unknown	Un	58767520	58774010
1141	6487	Un	23172462	23178948	unknown	Un	58775011	58781497
1142	6487	Un	23179949	23186435	unknown	Un	58782498	58788984
1143	6483	Un	23187436	23193918	unknown	Un	58789985	58796467
1144	6472	Un	23194919	23201390	unknown	Un	58797468	58803939
1145	6456	Un	23202391	23208846	unknown	Un	58804940	58811395
1146	6453	Un	23209847	23216299	unknown	Un	58812396	58818848
1297	6445	Un	23217300	23223744	unknown	Un	59892106	59898550
1148	6444	Un	23224745	23231188	unknown	Un	58827538	58833981
1149	6438	Un	23232189	23238626	unknown	Un	58834982	58841419
1440	6437	Un	23239627	23246063	unknown	Un	60793033	60799469
1339	6436	Un	23247064	23253499	unknown	Un	60168150	60174585
1150	6435	Un	23254500	23260934	unknown	Un	58842420	58848854
1391	6435	Un	23261935	23268369	unknown	Un	60496705	60503139
1151	6432	Un	23269370	23275801	unknown	Un	58849855	58856286
1193	6428	Un	23276802	23283229	unknown	Un	59165040	59171467
1484	6425	Un	23284230	23290654	unknown	Un	61062870	61069294
1152	6422	Un	23291655	23298076	unknown	Un	58857287	58863708
1153	6421	Un	23299077	23305497	unknown	Un	58864709	58871129
1154	6418	Un	23306498	23312915	unknown	Un	58872130	58878547
1155	6418	Un	23313916	23320333	unknown	Un	58879548	58885965
1467	6412	Un	23321334	23327745	unknown	Un	60957669	60964080
1156	6409	Un	23328746	23335154	unknown	Un	58886966	58893374
1275	6407	Un	23336155	23342561	unknown	Un	59742506	59748912
1157	6405	Un	23343562	23349966	unknown	Un	58894375	58900779
1207	6402	Un	23350967	23357368	unknown	Un	59265881	59272282
1158	6395	Un	23358369	23364763	unknown	Un	58901780	58908174
1390	6395	Un	23365764	23372158	unknown	Un	60489310	60495704
1221	6384	Un	23373159	23379542	unknown	Un	59366736	59373119
1286	6378	Un	23380543	23386920	unknown	Un	59816548	59822925
1229	6375	Un	23387921	23394295	unknown	Un	59422621	59428995
1160	6365	Un	23395296	23401660	unknown	Un	58916963	58923327
1305	6365	Un	23402661	23409025	unknown	Un	59945782	59952146
1179	6357	Un	23410026	23416382	unknown	Un	59058368	59064724
1194	6346	Un	23417383	23423728	unknown	Un	59172468	59178813
1197	6344	Un	23424729	23431072	unknown	Un	59194195	59200538
1162	6338	Un	23432073	23438410	unknown	Un	58931871	58938208
1163	6336	Un	23439411	23445746	unknown	Un	58939209	58945544
1164	6331	Un	23446747	23453077	unknown	Un	58946545	58952875
1279	6328	Un	23454078	23460405	unknown	Un	59769579	59775906
1330	6325	Un	23461406	23467730	unknown	Un	60109955	60116279
1166	6324	Un	23468731	23475054	unknown	Un	58961702	58968025
1167	6324	Un	23476055	23482378	unknown	Un	58969026	58975349
1183	6324	Un	23483379	23489702	unknown	Un	59087454	59093777
1168	6320	Un	23490703	23497022	unknown	Un	58976350	58982669
1170	6306	Un	23498023	23504328	unknown	Un	58991377	58997682
1171	6305	Un	23505329	23511633	unknown	Un	58998683	59004987
1173	6303	Un	23512634	23518936	unknown	Un	59013853	59020155
1175	6299	Un	23519937	23526235	unknown	Un	59028948	59035246
1303	6285	Un	23527236	23533520	unknown	Un	59931987	59938271
1176	6279	Un	23534521	23540799	unknown	Un	59036247	59042525
1239	6275	Un	23541800	23548074	unknown	Un	59491956	59498230
1263	6271	Un	23549075	23555345	unknown	Un	59659534	59665804
1196	6263	Un	23556346	23562608	unknown	Un	59186932	59193194
1178	6258	Un	23563609	23569866	unknown	Un	59051110	59057367
1180	6251	Un	23570867	23577117	unknown	Un	59065725	59071975
1181	6249	Un	23578118	23584366	unknown	Un	59072976	59079224
1182	6229	Un	23585367	23591595	unknown	Un	59080225	59086453
1459	6221	Un	23592596	23598816	unknown	Un	60907505	60913725
1185	6194	Un	23599817	23606010	unknown	Un	59104817	59111010
1219	6172	Un	23607011	23613182	unknown	Un	59352626	59358797
1264	6169	Un	23614183	23620351	unknown	Un	59666805	59672973
1188	6168	Un	23621352	23627519	unknown	Un	59129285	59135452
1189	6167	Un	23628520	23634686	unknown	Un	59136453	59142619
1272	6155	Un	23635687	23641841	unknown	Un	59721444	59727598
1190	6149	Un	23642842	23648990	unknown	Un	59143620	59149768
1191	6137	Un	23649991	23656127	unknown	Un	59150769	59156905
1192	6134	Un	23657128	23663261	unknown	Un	59157906	59164039
1195	6118	Un	23664262	23670379	unknown	Un	59179814	59185931
1273	6115	Un	23671380	23677494	unknown	Un	59728599	59734713
1271	6114	Un	23678495	23684608	unknown	Un	59714330	59720443
1216	6102	Un	23685609	23691710	unknown	Un	59331579	59337680
1198	6089	Un	23692711	23698799	unknown	Un	59201539	59207627
1199	6079	Un	23699800	23705878	unknown	Un	59208628	59214706
1266	6073	Un	23706879	23712951	unknown	Un	59680713	59686785
1324	6072	Un	23713952	23720023	unknown	Un	60071378	60077449
1419	6071	Un	23721024	23727094	unknown	Un	60669290	60675360
1200	6064	Un	23728095	23734158	unknown	Un	59215707	59221770
1202	6054	Un	23735159	23741212	unknown	Un	59230642	59236695
1203	6053	Un	23742213	23748265	unknown	Un	59237696	59243748
1225	6052	Un	23749266	23755317	unknown	Un	59394875	59400926
1204	6051	Un	23756318	23762368	unknown	Un	59244749	59250799
1322	6048	Un	23763369	23769416	unknown	Un	60058027	60064074
1244	6044	Un	23770417	23776460	unknown	Un	59526543	59532586
1205	6042	Un	23777461	23783502	unknown	Un	59251800	59257841
1553	6040	Un	23784503	23790542	unknown	Un	61462079	61468118
1206	6039	Un	23791543	23797581	unknown	Un	59258842	59264880
1400	6036	Un	23798582	23804617	unknown	Un	60552307	60558342
1208	6034	Un	23805618	23811651	unknown	Un	59273283	59279316
1256	6033	Un	23812652	23818684	unknown	Un	59611516	59617548
1477	6023	Un	23819685	23825707	unknown	Un	61019184	61025206
1313	6012	Un	23826708	23832719	unknown	Un	60000410	60006421
1210	6005	Un	23833720	23839724	unknown	Un	59289613	59295617
1211	6004	Un	23840725	23846728	unknown	Un	59296618	59302621
1212	5994	Un	23847729	23853722	unknown	Un	59303622	59309615
1213	5993	Un	23854723	23860715	unknown	Un	59310616	59316608
1214	5989	Un	23861716	23867704	unknown	Un	59317609	59323597
1234	5989	Un	23868705	23874693	unknown	Un	59457645	59463633
1378	5987	Un	23875694	23881680	unknown	Un	60413294	60419280
1215	5981	Un	23882681	23888661	unknown	Un	59324598	59330578
1417	5978	Un	23889662	23895639	unknown	Un	60655627	60661604
1217	5976	Un	23896640	23902615	unknown	Un	59338681	59344656
1252	5973	Un	23903616	23909588	unknown	Un	59584333	59590305
1218	5969	Un	23910589	23916557	unknown	Un	59345657	59351625
1230	5969	Un	23917558	23923526	unknown	Un	59429996	59435964
1232	5962	Un	23924527	23930488	unknown	Un	59443831	59449792
1220	5938	Un	23931489	23937426	unknown	Un	59359798	59365735
1243	5935	Un	23938427	23944361	unknown	Un	59519608	59525542
1222	5920	Un	23945362	23951281	unknown	Un	59374120	59380039
1223	5918	Un	23952282	23958199	unknown	Un	59381040	59386957
1224	5917	Un	23959200	23965116	unknown	Un	59387958	59393874
1226	5909	Un	23966117	23972025	unknown	Un	59401927	59407835
1227	5901	Un	23973026	23978926	unknown	Un	59408836	59414736
1370	5899	Un	23979927	23985825	unknown	Un	60363180	60369078
1228	5884	Un	23986826	23992709	unknown	Un	59415737	59421620
1565	5867	Un	23993710	23999576	unknown	Un	61532018	61537884
1231	5866	Un	24000577	24006442	unknown	Un	59436965	59442830
1233	5852	Un	24007443	24013294	unknown	Un	59450793	59456644
1425	5848	Un	24014295	24020142	unknown	Un	60705796	60711643
1235	5837	Un	24021143	24026979	unknown	Un	59464634	59470470
1236	5833	Un	24027980	24033812	unknown	Un	59471471	59477303
1237	5827	Un	24034813	24040639	unknown	Un	59478304	59484130
1238	5825	Un	24041640	24047464	unknown	Un	59485131	59490955
1448	5821	Un	24048465	24054285	unknown	Un	60841440	60847260
1338	5820	Un	24055286	24061105	unknown	Un	60161330	60167149
1295	5817	Un	24062106	24067922	unknown	Un	59877621	59883437
1254	5815	Un	24068923	24074737	unknown	Un	59598008	59603822
1520	5804	Un	24075738	24081541	unknown	Un	61271899	61277702
1240	5796	Un	24082542	24088337	unknown	Un	59499231	59505026
1241	5792	Un	24089338	24095129	unknown	Un	59506027	59511818
1274	5792	Un	24096130	24101921	unknown	Un	59735714	59741505
1242	5789	Un	24102922	24108710	unknown	Un	59512819	59518607
1284	5776	Un	24109711	24115486	unknown	Un	59803268	59809043
1399	5771	Un	24116487	24122257	unknown	Un	60545536	60551306
1309	5766	Un	24123258	24129023	unknown	Un	59973438	59979203
1245	5764	Un	24130024	24135787	unknown	Un	59533587	59539350
1475	5760	Un	24136788	24142547	unknown	Un	61007144	61012903
1247	5757	Un	24143548	24149304	unknown	Un	59548677	59554433
1350	5757	Un	24150305	24156061	unknown	Un	60237886	60243642
1373	5757	Un	24157062	24162818	unknown	Un	60382182	60387938
1404	5754	Un	24163819	24169572	unknown	Un	60577075	60582828
1267	5751	Un	24170573	24176323	unknown	Un	59687786	59693536
1364	5748	Un	24177324	24183071	unknown	Un	60325451	60331198
1503	5746	Un	24184072	24189817	unknown	Un	61173573	61179318
1405	5740	Un	24190818	24196557	unknown	Un	60583829	60589568
1265	5739	Un	24197558	24203296	unknown	Un	59673974	59679712
1280	5732	Un	24204297	24210028	unknown	Un	59776907	59782638
1249	5728	Un	24211029	24216756	unknown	Un	59564168	59569895
1250	5724	Un	24217757	24223480	unknown	Un	59570896	59576619
1251	5713	Un	24224481	24230193	unknown	Un	59577620	59583332
1366	5705	Un	24231194	24236898	unknown	Un	60338370	60344074
1361	5704	Un	24237899	24243602	unknown	Un	60306588	60312291
1253	5702	Un	24244603	24250304	unknown	Un	59591306	59597007
1255	5693	Un	24251305	24256997	unknown	Un	59604823	59610515
1418	5685	Un	24257998	24263682	unknown	Un	60662605	60668289
1258	5679	Un	24264683	24270361	unknown	Un	59626190	59631868
1333	5678	Un	24271362	24277039	unknown	Un	60129830	60135507
1259	5677	Un	24278040	24283716	unknown	Un	59632869	59638545
1260	5665	Un	24284717	24290381	unknown	Un	59639546	59645210
1261	5664	Un	24291382	24297045	unknown	Un	59646211	59651874
1262	5659	Un	24298046	24303704	unknown	Un	59652875	59658533
1359	5640	Un	24304705	24310344	unknown	Un	60293739	60299378
1472	5630	Un	24311345	24316974	unknown	Un	60989895	60995524
1523	5615	Un	24317975	24323589	unknown	Un	61288993	61294607
1281	5614	Un	24324590	24330203	unknown	Un	59783639	59789252
1268	5608	Un	24331204	24336811	unknown	Un	59694537	59700144
1412	5608	Un	24337812	24343419	unknown	Un	60625087	60630694
1453	5608	Un	24344420	24350027	unknown	Un	60872954	60878561
1465	5604	Un	24351028	24356631	unknown	Un	60944843	60950446
1269	5599	Un	24357632	24363230	unknown	Un	59701145	59706743
1288	5594	Un	24364231	24369824	unknown	Un	59830423	59836016
1299	5589	Un	24370825	24376413	unknown	Un	59906002	59911590
1270	5586	Un	24377414	24382999	unknown	Un	59707744	59713329
1294	5581	Un	24384000	24389580	unknown	Un	59871040	59876620
1429	5575	Un	24390581	24396155	unknown	Un	60729889	60735463
1449	5571	Un	24397156	24402726	unknown	Un	60848261	60853831
1482	5565	Un	24403727	24409291	unknown	Un	61050746	61056310
1276	5558	Un	24410292	24415849	unknown	Un	59749913	59755470
1277	5556	Un	24416850	24422405	unknown	Un	59756471	59762026
1278	5552	Un	24423406	24428957	unknown	Un	59763027	59768578
1349	5546	Un	24429958	24435503	unknown	Un	60231340	60236885
1431	5533	Un	24436504	24442036	unknown	Un	60741998	60747530
1452	5533	Un	24443037	24448569	unknown	Un	60866421	60871953
1302	5529	Un	24449570	24455098	unknown	Un	59925458	59930986
1414	5527	Un	24456099	24461625	unknown	Un	60637373	60642899
1282	5510	Un	24462626	24468135	unknown	Un	59790253	59795762
1304	5510	Un	24469136	24474645	unknown	Un	59939272	59944781
1517	5506	Un	24475646	24481151	unknown	Un	61255496	61261001
1283	5505	Un	24482152	24487656	unknown	Un	59796763	59802267
1285	5504	Un	24488657	24494160	unknown	Un	59810044	59815547
1559	5502	Un	24495161	24500662	unknown	Un	61497285	61502786
1287	5497	Un	24501663	24507159	unknown	Un	59823926	59829422
1443	5497	Un	24508160	24513656	unknown	Un	60811467	60816963
1481	5491	Un	24514657	24520147	unknown	Un	61044255	61049745
1289	5489	Un	24521148	24526636	unknown	Un	59837017	59842505
1290	5487	Un	24527637	24533123	unknown	Un	59843506	59848992
1292	5485	Un	24534124	24539608	unknown	Un	59858071	59863555
1293	5484	Un	24540609	24546092	unknown	Un	59864556	59870039
1480	5474	Un	24547093	24552566	unknown	Un	61037781	61043254
1500	5474	Un	24553567	24559040	unknown	Un	61155285	61160758
1447	5464	Un	24560041	24565504	unknown	Un	60834976	60840439
1298	5451	Un	24566505	24571955	unknown	Un	59899551	59905001
1486	5436	Un	24572956	24578391	unknown	Un	61076699	61082134
1525	5436	Un	24579392	24584827	unknown	Un	61301931	61307366
1300	5434	Un	24585828	24591261	unknown	Un	59912591	59918024
1301	5433	Un	24592262	24597694	unknown	Un	59919025	59924457
1488	5430	Un	24598695	24604124	unknown	Un	61088114	61093543
1327	5420	Un	24605125	24610544	unknown	Un	60091015	60096434
1385	5407	Un	24611545	24616951	unknown	Un	60459275	60464681
1320	5406	Un	24617952	24623357	unknown	Un	60045316	60050721
1485	5404	Un	24624358	24629761	unknown	Un	61070295	61075698
1306	5380	Un	24630762	24636141	unknown	Un	59953147	59958526
1307	5379	Un	24637142	24642520	unknown	Un	59959527	59964905
1464	5376	Un	24643521	24648896	unknown	Un	60938467	60943842
1542	5374	Un	24649897	24655270	unknown	Un	61403485	61408858
1514	5360	Un	24656271	24661630	unknown	Un	61238346	61243705
1310	5358	Un	24662631	24667988	unknown	Un	59980204	59985561
1311	5344	Un	24668989	24674332	unknown	Un	59986562	59991905
1492	5344	Un	24675333	24680676	unknown	Un	61109757	61115100
1506	5336	Un	24681677	24687012	unknown	Un	61192586	61197921
1524	5323	Un	24688013	24693335	unknown	Un	61295608	61300930
1332	5322	Un	24694336	24699657	unknown	Un	60123508	60128829
1314	5320	Un	24700658	24705977	unknown	Un	60007422	60012741
1315	5319	Un	24706978	24712296	unknown	Un	60013742	60019060
1316	5317	Un	24713297	24718613	unknown	Un	60020061	60025377
1317	5314	Un	24719614	24724927	unknown	Un	60026378	60031691
1318	5313	Un	24725928	24731240	unknown	Un	60032692	60038004
1319	5311	Un	24732241	24737551	unknown	Un	60039005	60044315
1321	5305	Un	24738552	24743856	unknown	Un	60051722	60057026
1323	5303	Un	24744857	24750159	unknown	Un	60065075	60070377
1342	5295	Un	24751160	24756454	unknown	Un	60187980	60193274
1325	5288	Un	24757455	24762742	unknown	Un	60078450	60083737
1470	5287	Un	24763743	24769029	unknown	Un	60977331	60982617
1326	5277	Un	24770030	24775306	unknown	Un	60084738	60090014
1471	5277	Un	24776307	24781583	unknown	Un	60983618	60988894
1504	5273	Un	24782584	24787856	unknown	Un	61180319	61185591
1328	5264	Un	24788857	24794120	unknown	Un	60097435	60102698
1498	5259	Un	24795121	24800379	unknown	Un	61143403	61148661
1329	5256	Un	24801380	24806635	unknown	Un	60103699	60108954
1469	5256	Un	24807636	24812891	unknown	Un	60971075	60976330
1541	5244	Un	24813892	24819135	unknown	Un	61397241	61402484
1501	5240	Un	24820136	24825375	unknown	Un	61161759	61166998
1331	5228	Un	24826376	24831603	unknown	Un	60117280	60122507
1377	5227	Un	24832604	24837830	unknown	Un	60407067	60412293
1357	5223	Un	24838831	24844053	unknown	Un	60281410	60286632
1394	5223	Un	24845054	24850276	unknown	Un	60515829	60521051
1466	5222	Un	24851277	24856498	unknown	Un	60951447	60956668
1403	5217	Un	24857499	24862715	unknown	Un	60570858	60576074
1513	5214	Un	24863716	24868929	unknown	Un	61232132	61237345
1360	5209	Un	24869930	24875138	unknown	Un	60300379	60305587
1334	5208	Un	24876139	24881346	unknown	Un	60136508	60141715
1335	5207	Un	24882347	24887553	unknown	Un	60142716	60147922
1336	5204	Un	24888554	24893757	unknown	Un	60148923	60154126
1337	5203	Un	24894758	24899960	unknown	Un	60155127	60160329
1340	5198	Un	24900961	24906158	unknown	Un	60175586	60180783
1341	5196	Un	24907159	24912354	unknown	Un	60181784	60186979
1424	5191	Un	24913355	24918545	unknown	Un	60699605	60704795
1556	5190	Un	24919546	24924735	unknown	Un	61479098	61484287
1343	5187	Un	24925736	24930922	unknown	Un	60194275	60199461
1344	5184	Un	24931923	24937106	unknown	Un	60200462	60205645
1376	5184	Un	24938107	24943290	unknown	Un	60400883	60406066
1345	5180	Un	24944291	24949470	unknown	Un	60206646	60211825
1346	5178	Un	24950471	24955648	unknown	Un	60212826	60218003
1347	5177	Un	24956649	24961825	unknown	Un	60219004	60224180
1365	5171	Un	24962826	24967996	unknown	Un	60332199	60337369
1463	5163	Un	24968997	24974159	unknown	Un	60932304	60937466
1348	5159	Un	24975160	24980318	unknown	Un	60225181	60230339
1515	5147	Un	24981319	24986465	unknown	Un	61244706	61249852
1509	5146	Un	24987466	24992611	unknown	Un	61210268	61215413
1380	5145	Un	24993612	24998756	unknown	Un	60426304	60431448
1550	5142	Un	24999757	25004898	unknown	Un	61445861	61451002
1351	5137	Un	25005899	25011035	unknown	Un	60244643	60249779
1586	5137	Un	25012036	25017172	unknown	Un	61648763	61653899
1352	5136	Un	25018173	25023308	unknown	Un	60250780	60255915
1427	5136	Un	25024309	25029444	unknown	Un	60718208	60723343
1353	5135	Un	25030445	25035579	unknown	Un	60256916	60262050
1574	5131	Un	25036580	25041710	unknown	Un	61586367	61591497
1445	5124	Un	25042711	25047834	unknown	Un	60823470	60828593
1354	5123	Un	25048835	25053957	unknown	Un	60263051	60268173
1512	5123	Un	25054958	25060080	unknown	Un	61226009	61231131
1355	5119	Un	25061081	25066199	unknown	Un	60269174	60274292
1356	5117	Un	25067200	25072316	unknown	Un	60275293	60280409
1383	5111	Un	25073317	25078427	unknown	Un	60447261	60452371
1645	5111	Un	25079428	25084538	unknown	Un	61942327	61947437
1358	5106	Un	25085539	25090644	unknown	Un	60287633	60292738
1372	5096	Un	25091645	25096740	unknown	Un	60376086	60381181
1558	5093	Un	25097741	25102833	unknown	Un	61491192	61496284
1568	5092	Un	25103834	25108925	unknown	Un	61550179	61555270
1415	5085	Un	25109926	25115010	unknown	Un	60643900	60648984
1362	5080	Un	25116011	25121090	unknown	Un	60313292	60318371
1363	5079	Un	25122091	25127169	unknown	Un	60319372	60324450
1454	5071	Un	25128170	25133240	unknown	Un	60879562	60884632
1605	5066	Un	25134241	25139306	unknown	Un	61747885	61752950
1398	5051	Un	25140307	25145357	unknown	Un	60539485	60544535
1367	5042	Un	25146358	25151399	unknown	Un	60345075	60350116
1438	5040	Un	25152400	25157439	unknown	Un	60781548	60786587
1368	5038	Un	25158440	25163477	unknown	Un	60351117	60356154
1532	5034	Un	25164478	25169511	unknown	Un	61339158	61344191
1420	5030	Un	25170512	25175541	unknown	Un	60676361	60681390
1369	5025	Un	25176542	25181566	unknown	Un	60357155	60362179
1379	5023	Un	25182567	25187589	unknown	Un	60420281	60425303
1571	5015	Un	25188590	25193604	unknown	Un	61565420	61570434
1371	5007	Un	25194605	25199611	unknown	Un	60370079	60375085
1563	5006	Un	25200612	25205617	unknown	Un	61520445	61525450
1611	5001	Un	25206618	25211618	unknown	Un	61776331	61781331
1496	5000	Un	25212619	25217618	unknown	Un	61131757	61136756
1462	4995	Un	25218619	25223613	unknown	Un	60926309	60931303
1468	4994	Un	25224614	25229607	unknown	Un	60965081	60970074
1505	4994	Un	25230608	25235601	unknown	Un	61186592	61191585
1598	4980	Un	25236602	25241581	unknown	Un	61711657	61716636
1593	4976	Un	25242582	25247557	unknown	Un	61684357	61689332
1374	4975	Un	25248558	25253532	unknown	Un	60388939	60393913
1375	4969	Un	25254533	25259501	unknown	Un	60394914	60399882
1389	4966	Un	25260502	25265467	unknown	Un	60483344	60488309
1572	4965	Un	25266468	25271432	unknown	Un	61571435	61576399
1535	4957	Un	25272433	25277389	unknown	Un	61356830	61361786
1539	4946	Un	25278390	25283335	unknown	Un	61387009	61391954
1461	4941	Un	25284336	25289276	unknown	Un	60920368	60925308
1451	4932	Un	25290277	25295208	unknown	Un	60860489	60865420
1544	4927	Un	25296209	25301135	unknown	Un	61415684	61420610
1458	4926	Un	25302136	25307061	unknown	Un	60901579	60906504
1534	4926	Un	25308062	25312987	unknown	Un	61350904	61355829
1381	4919	Un	25313988	25318906	unknown	Un	60432449	60437367
1579	4907	Un	25319907	25324813	unknown	Un	61614046	61618952
1585	4907	Un	25325814	25330720	unknown	Un	61642856	61647762
1557	4904	Un	25331721	25336624	unknown	Un	61485288	61490191
1384	4903	Un	25337625	25342527	unknown	Un	60453372	60458274
1566	4900	Un	25343528	25348427	unknown	Un	61538885	61543784
1386	4895	Un	25349428	25354322	unknown	Un	60465682	60470576
1387	4884	Un	25355323	25360206	unknown	Un	60471577	60476460
1388	4883	Un	25361207	25366089	unknown	Un	60477461	60482343
1421	4881	Un	25367090	25371970	unknown	Un	60682391	60687271
1624	4881	Un	25372971	25377851	unknown	Un	61843027	61847907
1408	4879	Un	25378852	25383730	unknown	Un	60602047	60606925
1397	4873	Un	25384731	25389603	unknown	Un	60533612	60538484
1625	4857	Un	25390604	25395460	unknown	Un	61848908	61853764
1554	4855	Un	25396461	25401315	unknown	Un	61469119	61473973
1562	4853	Un	25402316	25407168	unknown	Un	61514592	61519444
1602	4849	Un	25408169	25413017	unknown	Un	61732654	61737502
1392	4847	Un	25414018	25418864	unknown	Un	60504140	60508986
1393	4842	Un	25419865	25424706	unknown	Un	60509987	60514828
1575	4838	Un	25425707	25430544	unknown	Un	61592498	61597335
1479	4835	Un	25431545	25436379	unknown	Un	61031946	61036780
1543	4825	Un	25437380	25442204	unknown	Un	61409859	61414683
1537	4800	Un	25443205	25448004	unknown	Un	61376897	61381696
1603	4800	Un	25449005	25453804	unknown	Un	61738503	61743302
1596	4798	Un	25454805	25459602	unknown	Un	61700177	61704974
1591	4796	Un	25460603	25465398	unknown	Un	61674783	61679578
1613	4792	Un	25466399	25471190	unknown	Un	61787839	61792630
1601	4783	Un	25472191	25476973	unknown	Un	61726871	61731653
1623	4781	Un	25477974	25482754	unknown	Un	61837246	61842026
1395	4780	Un	25483755	25488534	unknown	Un	60522052	60526831
1396	4780	Un	25489535	25494314	unknown	Un	60527832	60532611
1588	4780	Un	25495315	25500094	unknown	Un	61659697	61664476
1531	4769	Un	25501095	25505863	unknown	Un	61333389	61338157
1581	4767	Un	25506864	25511630	unknown	Un	61623813	61628579
1401	4761	Un	25512631	25517391	unknown	Un	60559343	60564103
1402	4754	Un	25518392	25523145	unknown	Un	60565104	60569857
1634	4750	Un	25524146	25528895	unknown	Un	61887204	61891953
1406	4739	Un	25529896	25534634	unknown	Un	60590569	60595307
1407	4739	Un	25535635	25540373	unknown	Un	60596308	60601046
1423	4739	Un	25541374	25546112	unknown	Un	60693866	60698604
1478	4739	Un	25547113	25551851	unknown	Un	61026207	61030945
1409	4733	Un	25552852	25557584	unknown	Un	60607926	60612658
1410	4732	Un	25558585	25563316	unknown	Un	60613659	60618390
1533	4712	Un	25564317	25569028	unknown	Un	61345192	61349903
1560	4697	Un	25570029	25574725	unknown	Un	61503787	61508483
1411	4696	Un	25575726	25580421	unknown	Un	60619391	60624086
1507	4696	Un	25581422	25586117	unknown	Un	61198922	61203617
1547	4688	Un	25587118	25591805	unknown	Un	61430681	61435368
1641	4684	Un	25592806	25597489	unknown	Un	61922918	61927601
1597	4682	Un	25598490	25603171	unknown	Un	61705975	61710656
1413	4678	Un	25604172	25608849	unknown	Un	60631695	60636372
1626	4672	Un	25609850	25614521	unknown	Un	61854765	61859436
1631	4658	Un	25615522	25620179	unknown	Un	61874770	61879427
1450	4657	Un	25621180	25625836	unknown	Un	60854832	60859488
1494	4651	Un	25626837	25631487	unknown	Un	61121196	61125846
1508	4650	Un	25632488	25637137	unknown	Un	61204618	61209267
1583	4649	Un	25638138	25642786	unknown	Un	61633396	61638044
1497	4646	Un	25643787	25648432	unknown	Un	61137757	61142402
1416	4642	Un	25649433	25654074	unknown	Un	60649985	60654626
1460	4642	Un	25655075	25659716	unknown	Un	60914726	60919367
1577	4634	Un	25660717	25665350	unknown	Un	61603716	61608349
1499	4623	Un	25666351	25670973	unknown	Un	61149662	61154284
1530	4617	Un	25671974	25676590	unknown	Un	61327772	61332388
1595	4616	Un	25677591	25682206	unknown	Un	61694561	61699176
1679	4616	Un	25683207	25687822	unknown	Un	62072489	62077104
1528	4595	Un	25688823	25693417	unknown	Un	61317729	61322323
1422	4594	Un	25694418	25699011	unknown	Un	60688272	60692865
1621	4581	Un	25700012	25704592	unknown	Un	61826467	61831047
1502	4574	Un	25705593	25710166	unknown	Un	61167999	61172572
1564	4567	Un	25711167	25715733	unknown	Un	61526451	61531017
1442	4566	Un	25716734	25721299	unknown	Un	60805901	60810466
1426	4564	Un	25722300	25726863	unknown	Un	60712644	60717207
1483	4559	Un	25727864	25732422	unknown	Un	61057311	61061869
1640	4558	Un	25733423	25737980	unknown	Un	61917360	61921917
1614	4555	Un	25738981	25743535	unknown	Un	61793631	61798185
1474	4553	Un	25744536	25749088	unknown	Un	61001591	61006143
1437	4550	Un	25750089	25754638	unknown	Un	60775998	60780547
1428	4545	Un	25755639	25760183	unknown	Un	60724344	60728888
1430	4534	Un	25761184	25765717	unknown	Un	60736464	60740997
1599	4534	Un	25766718	25771251	unknown	Un	61717637	61722170
1590	4525	Un	25772252	25776776	unknown	Un	61669258	61673782
1432	4521	Un	25777777	25782297	unknown	Un	60748531	60753051
1673	4518	Un	25783298	25787815	unknown	Un	62053852	62058369
1433	4515	Un	25788816	25793330	unknown	Un	60754052	60758566
1612	4507	Un	25794331	25798837	unknown	Un	61782332	61786838
1444	4506	Un	25799838	25804343	unknown	Un	60817964	60822469
1434	4501	Un	25805344	25809844	unknown	Un	60759567	60764067
1637	4476	Un	25810845	25815320	unknown	Un	61905609	61910084
1435	4472	Un	25816321	25820792	unknown	Un	60765068	60769539
1667	4467	Un	25821793	25826259	unknown	Un	62031514	62035980
1436	4458	Un	25827260	25831717	unknown	Un	60770540	60774997
1684	4453	Un	25832718	25837170	unknown	Un	62088326	62092778
1646	4448	Un	25838171	25842618	unknown	Un	61948438	61952885
1609	4447	Un	25843619	25848065	unknown	Un	61767406	61771852
1439	4445	Un	25849066	25853510	unknown	Un	60787588	60792032
1642	4435	Un	25854511	25858945	unknown	Un	61928602	61933036
1441	4431	Un	25859946	25864376	unknown	Un	60800470	60804900
1551	4411	Un	25865377	25869787	unknown	Un	61452003	61456413
1567	4394	Un	25870788	25875181	unknown	Un	61544785	61549178
1446	4382	Un	25876182	25880563	unknown	Un	60829594	60833975
1618	4381	Un	25881564	25885944	unknown	Un	61810514	61814894
1576	4380	Un	25886945	25891324	unknown	Un	61598336	61602715
1607	4380	Un	25892325	25896704	unknown	Un	61758516	61762895
1456	4377	Un	25897705	25902081	unknown	Un	60890928	60895304
1659	4344	Un	25903082	25907425	unknown	Un	62004141	62008484
1620	4331	Un	25908426	25912756	unknown	Un	61821136	61825466
1651	4304	Un	25913757	25918060	unknown	Un	61970492	61974795
1518	4302	Un	25919061	25923362	unknown	Un	61262002	61266303
1455	4295	Un	25924363	25928657	unknown	Un	60885633	60889927
1476	4280	Un	25929658	25933937	unknown	Un	61013904	61018183
1457	4274	Un	25934938	25939211	unknown	Un	60896305	60900578
1521	4274	Un	25940212	25944485	unknown	Un	61278703	61282976
1649	4274	Un	25945486	25949759	unknown	Un	61959986	61964259
1654	4269	Un	25950760	25955028	unknown	Un	61981690	61985958
1619	4241	Un	25956029	25960269	unknown	Un	61815895	61820135
1650	4232	Un	25961270	25965501	unknown	Un	61965260	61969491
1672	4218	Un	25966502	25970719	unknown	Un	62048634	62052851
1643	4216	Un	25971720	25975935	unknown	Un	61934037	61938252
1489	4215	Un	25976936	25981150	unknown	Un	61094544	61098758
1622	4198	Un	25982151	25986348	unknown	Un	61832048	61836245
1549	4188	Un	25987349	25991536	unknown	Un	61440673	61444860
1665	4186	Un	25992537	25996722	unknown	Un	62023554	62027739
1569	4174	Un	25997723	26001896	unknown	Un	61556271	61560444
1561	4108	Un	26002897	26007004	unknown	Un	61509484	61513591
1493	4095	Un	26008005	26012099	unknown	Un	61116101	61120195
1473	4066	Un	26013100	26017165	unknown	Un	60996525	61000590
1491	4057	Un	26018166	26022222	unknown	Un	61104700	61108756
1522	4016	Un	26023223	26027238	unknown	Un	61283977	61287992
1487	3979	Un	26028239	26032217	unknown	Un	61083135	61087113
1490	3941	Un	26033218	26037158	unknown	Un	61099759	61103699
1495	3910	Un	26038159	26042068	unknown	Un	61126847	61130756
1526	3900	Un	26043069	26046968	unknown	Un	61308367	61312266
1510	3867	Un	26047969	26051835	unknown	Un	61216414	61220280
1546	3836	Un	26052836	26056671	unknown	Un	61425845	61429680
1587	3797	Un	26057672	26061468	unknown	Un	61654900	61658696
1511	3728	Un	26062469	26066196	unknown	Un	61221281	61225008
1578	3696	Un	26067197	26070892	unknown	Un	61609350	61613045
1552	3665	Un	26071893	26075557	unknown	Un	61457414	61461078
1516	3643	Un	26076558	26080200	unknown	Un	61250853	61254495
1519	3595	Un	26081201	26084795	unknown	Un	61267304	61270898
1606	3565	Un	26085796	26089360	unknown	Un	61753951	61757515
1627	3473	Un	26090361	26093833	unknown	Un	61860437	61863909
1527	3462	Un	26094834	26098295	unknown	Un	61313267	61316728
1529	3448	Un	26099296	26102743	unknown	Un	61323324	61326771
1615	3432	Un	26103744	26107175	unknown	Un	61799186	61802617
1538	3312	Un	26108176	26111487	unknown	Un	61382697	61386008
1548	3304	Un	26112488	26115791	unknown	Un	61436369	61439672
1540	3286	Un	26116792	26120077	unknown	Un	61392955	61396240
1545	3234	Un	26121078	26124311	unknown	Un	61421611	61424844
1594	3228	Un	26125312	26128539	unknown	Un	61690333	61693560
1555	3124	Un	26129540	26132663	unknown	Un	61474974	61478097
1570	2975	Un	26133664	26136638	unknown	Un	61561445	61564419
1580	2860	Un	26137639	26140498	unknown	Un	61619953	61622812
1582	2816	Un	26141499	26144314	unknown	Un	61629580	61632395
1584	2811	Un	26145315	26148125	unknown	Un	61639045	61641855
1589	2781	Un	26149126	26151906	unknown	Un	61665477	61668257
1592	2778	Un	26152907	26155684	unknown	Un	61680579	61683356
1600	2700	Un	26156685	26159384	unknown	Un	61723171	61725870
1604	2582	Un	26160385	26162966	unknown	Un	61744303	61746884
1632	2570	Un	26163967	26166536	unknown	Un	61880428	61882997
1608	2510	Un	26167537	26170046	unknown	Un	61763896	61766405
1610	2478	Un	26171047	26173524	unknown	Un	61772853	61775330
1616	2451	Un	26174525	26176975	unknown	Un	61803618	61806068
1617	2445	Un	26177976	26180420	unknown	Un	61807069	61809513
1669	2438	Un	26181421	26183858	unknown	Un	62039726	62042163
1628	2297	Un	26184859	26187155	unknown	Un	61864910	61867206
1629	2294	Un	26188156	26190449	unknown	Un	61868207	61870500
1630	2269	Un	26191450	26193718	unknown	Un	61871501	61873769
1633	2206	Un	26194719	26196924	unknown	Un	61883998	61886203
1635	2174	Un	26197925	26200098	unknown	Un	61892954	61895127
1638	2139	Un	26201099	26203237	unknown	Un	61911085	61913223
1639	2136	Un	26204238	26206373	unknown	Un	61914224	61916359
1644	2074	Un	26207374	26209447	unknown	Un	61939253	61941326
1647	2053	Un	26210448	26212500	unknown	Un	61953886	61955938
1648	2047	Un	26213501	26215547	unknown	Un	61956939	61958985
1652	1970	Un	26216548	26218517	unknown	Un	61975796	61977765
1653	1924	Un	26219518	26221441	unknown	Un	61978766	61980689
1655	1896	Un	26222442	26224337	unknown	Un	61986959	61988854
1656	1892	Un	26225338	26227229	unknown	Un	61989855	61991746
1657	1879	Un	26228230	26230108	unknown	Un	61992747	61994625
1660	1830	Un	26231109	26232938	unknown	Un	62009485	62011314
1661	1827	Un	26233939	26235765	unknown	Un	62012315	62014141
1662	1826	Un	26236766	26238591	unknown	Un	62015142	62016967
1663	1802	Un	26239592	26241393	unknown	Un	62017968	62019769
1664	1784	Un	26242394	26244177	unknown	Un	62020770	62022553
1666	1774	Un	26245178	26246951	unknown	Un	62028740	62030513
1668	1745	Un	26247952	26249696	unknown	Un	62036981	62038725
1670	1736	Un	26250697	26252432	unknown	Un	62043164	62044899
1671	1734	Un	26253433	26255166	unknown	Un	62045900	62047633
1674	1639	Un	26256167	26257805	unknown	Un	62059370	62061008
1675	1627	Un	26258806	26260432	unknown	Un	62062009	62063635
1676	1622	Un	26261433	26263054	unknown	Un	62064636	62066257
1677	1616	Un	26264055	26265670	unknown	Un	62067258	62068873
1678	1615	Un	26266671	26268285	unknown	Un	62069874	62071488
1680	1569	Un	26269286	26270854	unknown	Un	62078105	62079673
1681	1558	Un	26271855	26273412	unknown	Un	62080674	62082231
1682	1552	Un	26274413	26275964	unknown	Un	62083232	62084783
1683	1542	Un	26276965	26278506	unknown	Un	62085784	62087325
1685	1523	Un	26279507	26281029	unknown	Un	62093779	62095301
1686	1521	Un	26282030	26283550	unknown	Un	62096302	62097822
1687	1514	Un	26284551	26286064	unknown	Un	62098823	62100336
1688	1483	Un	26287065	26288547	unknown	Un	62101337	62102819
1689	1466	Un	26289548	26291013	unknown	Un	62103820	62105285
1690	1458	Un	26292014	26293471	unknown	Un	62106286	62107743
1692	1439	Un	26294472	26295910	unknown	Un	62118707	62120145
1693	1436	Un	26296911	26298346	unknown	Un	62121146	62122581
1694	1436	Un	26299347	26300782	unknown	Un	62123582	62125017
1695	1428	Un	26301783	26303210	unknown	Un	62126018	62127445
1696	1420	Un	26304211	26305630	unknown	Un	62128446	62129865
1697	1411	Un	26306631	26308041	unknown	Un	62130866	62132276
1698	1372	Un	26309042	26310413	unknown	Un	62133277	62134648
1699	1371	Un	26311414	26312784	unknown	Un	62135649	62137019
1700	1371	Un	26313785	26315155	unknown	Un	62138020	62139390
1701	1332	Un	26316156	26317487	unknown	Un	62140391	62141722
1702	1330	Un	26318488	26319817	unknown	Un	62142723	62144052
1703	1322	Un	26320818	26322139	unknown	Un	62145053	62146374
1704	1321	Un	26323140	26324460	unknown	Un	62147375	62148695
1705	1309	Un	26325461	26326769	unknown	Un	62149696	62151004
1706	1298	Un	26327770	26329067	unknown	Un	62152005	62153302
1707	1276	Un	26330068	26331343	unknown	Un	62154303	62155578
1708	1274	Un	26332344	26333617	unknown	Un	62156579	62157852
1709	1268	Un	26334618	26335885	unknown	Un	62158853	62160120
1710	1265	Un	26336886	26338150	unknown	Un	62161121	62162385
1711	1260	Un	26339151	26340410	unknown	Un	62163386	62164645
1712	1246	Un	26341411	26342656	unknown	Un	62165646	62166891
1713	1246	Un	26343657	26344902	unknown	Un	62167892	62169137
1714	1226	Un	26345903	26347128	unknown	Un	62170138	62171363
1715	1218	Un	26348129	26349346	unknown	Un	62172364	62173581
1716	1209	Un	26350347	26351555	unknown	Un	62174582	62175790
1717	1208	Un	26352556	26353763	unknown	Un	62176791	62177998
1718	1202	Un	26354764	26355965	unknown	Un	62178999	62180200
1719	1188	Un	26356966	26358153	unknown	Un	62181201	62182388
1720	1186	Un	26359154	26360339	unknown	Un	62183389	62184574
1721	1184	Un	26361340	26362523	unknown	Un	62185575	62186758
1722	1180	Un	26363524	26364703	unknown	Un	62187759	62188938
1723	1166	Un	26365704	26366869	unknown	Un	62189939	62191104
1724	1151	Un	26367870	26369020	unknown	Un	62192105	62193255
1725	1144	Un	26370021	26371164	unknown	Un	62194256	62195399
1726	1130	Un	26372165	26373294	unknown	Un	62196400	62197529
1727	1123	Un	26374295	26375417	unknown	Un	62198530	62199652
1728	1121	Un	26376418	26377538	unknown	Un	62200653	62201773
1729	1113	Un	26378539	26379651	unknown	Un	62202774	62203886
1730	1102	Un	26380652	26381753	unknown	Un	62204887	62205988
1731	1097	Un	26382754	26383850	unknown	Un	62206989	62208085
1732	1077	Un	26384851	26385927	unknown	Un	62209086	62210162
1733	1077	Un	26386928	26388004	unknown	Un	62211163	62212239
1734	1065	Un	26389005	26390069	unknown	Un	62213240	62214304
1735	1053	Un	26391070	26392122	unknown	Un	62215305	62216357
1736	1048	Un	26393123	26394170	unknown	Un	62217358	62218405
1737	1046	Un	26395171	26396216	unknown	Un	62219406	62220451
1738	1043	Un	26397217	26398259	unknown	Un	62221452	62222494
1739	1040	Un	26399260	26400299	unknown	Un	62223495	62224534
1740	1028	Un	26401300	26402327	unknown	Un	62225535	62226562
1741	1018	Un	26403328	26404345	unknown	Un	62227563	62228580
1742	1012	Un	26405346	26406357	unknown	Un	62229581	62230592
1743	1007	Un	26407358	26408364	unknown	Un	62231593	62232599
1744	1005	Un	26409365	26410369	unknown	Un	62233600	62234604
1745	1003	Un	26411370	26412372	unknown	Un	62235605	62236607
1746	1001	Un	26413373	26414373	unknown	Un	62237608	62238608
1747	993	Un	26415374	26416366	unknown	Un	62239609	62240601
1748	982	Un	26417367	26418348	unknown	Un	62241602	62242583
1749	981	Un	26419349	26420329	unknown	Un	62243584	62244564
1750	978	Un	26421330	26422307	unknown	Un	62245565	62246542
1751	968	Un	26423308	26424275	unknown	Un	62247543	62248510
1752	952	Un	26425276	26426227	unknown	Un	62249511	62250462
1753	945	Un	26427228	26428172	unknown	Un	62251463	62252407
1754	941	Un	26429173	26430113	unknown	Un	62253408	62254348
1755	924	Un	26431114	26432037	unknown	Un	62255349	62256272
1756	924	Un	26433038	26433961	unknown	Un	62257273	62258196
1757	924	Un	26434962	26435885	unknown	Un	62259197	62260120
1758	922	Un	26436886	26437807	unknown	Un	62261121	62262042
1759	921	Un	26438808	26439728	unknown	Un	62263043	62263963
1760	917	Un	26440729	26441645	unknown	Un	62264964	62265880
1761	912	Un	26442646	26443557	unknown	Un	62266881	62267792
1762	889	Un	26444558	26445446	unknown	Un	62268793	62269681
1763	879	Un	26446447	26447325	unknown	Un	62270682	62271560
1764	875	Un	26448326	26449200	unknown	Un	62272561	62273435
1765	875	Un	26450201	26451075	unknown	Un	62274436	62275310
1766	873	Un	26452076	26452948	unknown	Un	62276311	62277183
1767	865	Un	26453949	26454813	unknown	Un	62278184	62279048
1768	865	Un	26455814	26456678	unknown	Un	62280049	62280913
1769	862	Un	26457679	26458540	unknown	Un	62281914	62282775
1770	859	Un	26459541	26460399	unknown	Un	62283776	62284634
1771	857	Un	26461400	26462256	unknown	Un	62285635	62286491
1772	854	Un	26463257	26464110	unknown	Un	62287492	62288345
1773	853	Un	26465111	26465963	unknown	Un	62289346	62290198
1774	842	Un	26466964	26467805	unknown	Un	62291199	62292040
1775	840	Un	26468806	26469645	unknown	Un	62293041	62293880
1776	839	Un	26470646	26471484	unknown	Un	62294881	62295719
1777	838	Un	26472485	26473322	unknown	Un	62296720	62297557
1778	835	Un	26474323	26475157	unknown	Un	62298558	62299392
1779	833	Un	26476158	26476990	unknown	Un	62300393	62301225
1780	832	Un	26477991	26478822	unknown	Un	62302226	62303057
1781	830	Un	26479823	26480652	unknown	Un	62304058	62304887
1782	828	Un	26481653	26482480	unknown	Un	62305888	62306715
1783	826	Un	26483481	26484306	unknown	Un	62307716	62308541
1784	826	Un	26485307	26486132	unknown	Un	62309542	62310367
1785	822	Un	26487133	26487954	unknown	Un	62311368	62312189
1786	819	Un	26488955	26489773	unknown	Un	62313190	62314008
1787	818	Un	26490774	26491591	unknown	Un	62315009	62315826
1788	818	Un	26492592	26493409	unknown	Un	62316827	62317644
1789	817	Un	26494410	26495226	unknown	Un	62318645	62319461
1790	817	Un	26496227	26497043	unknown	Un	62320462	62321278
1791	815	Un	26498044	26498858	unknown	Un	62322279	62323093
1792	813	Un	26499859	26500671	unknown	Un	62324094	62324906
1793	812	Un	26501672	26502483	unknown	Un	62325907	62326718
1794	810	Un	26503484	26504293	unknown	Un	62327719	62328528
1795	810	Un	26505294	26506103	unknown	Un	62329529	62330338
1796	810	Un	26507104	26507913	unknown	Un	62331339	62332148
1797	809	Un	26508914	26509722	unknown	Un	62333149	62333957
1798	808	Un	26510723	26511530	unknown	Un	62334958	62335765
1799	806	Un	26512531	26513336	unknown	Un	62336766	62337571
1800	805	Un	26514337	26515141	unknown	Un	62338572	62339376
1801	804	Un	26516142	26516945	unknown	Un	62340377	62341180
1802	802	Un	26517946	26518747	unknown	Un	62342181	62342982
1803	802	Un	26519748	26520549	unknown	Un	62343983	62344784
1804	800	Un	26521550	26522349	unknown	Un	62345785	62346584
1805	797	Un	26523350	26524146	unknown	Un	62347585	62348381
1806	793	Un	26525147	26525939	unknown	Un	62349382	62350174
1807	793	Un	26526940	26527732	unknown	Un	62351175	62351967
1808	793	Un	26528733	26529525	unknown	Un	62352968	62353760
1809	792	Un	26530526	26531317	unknown	Un	62354761	62355552
1810	789	Un	26532318	26533106	unknown	Un	62356553	62357341
1811	787	Un	26534107	26534893	unknown	Un	62358342	62359128
1812	787	Un	26535894	26536680	unknown	Un	62360129	62360915
1813	786	Un	26537681	26538466	unknown	Un	62361916	62362701
1814	785	Un	26539467	26540251	unknown	Un	62363702	62364486
1815	784	Un	26541252	26542035	unknown	Un	62365487	62366270
1816	784	Un	26543036	26543819	unknown	Un	62367271	62368054
1817	782	Un	26544820	26545601	unknown	Un	62369055	62369836
1818	775	Un	26546602	26547376	unknown	Un	62370837	62371611
1819	774	Un	26548377	26549150	unknown	Un	62372612	62373385
1820	774	Un	26550151	26550924	unknown	Un	62374386	62375159
1821	774	Un	26551925	26552698	unknown	Un	62376160	62376933
1822	772	Un	26553699	26554470	unknown	Un	62376934	62377705
1823	770	Un	26555471	26556240	unknown	Un	62378706	62379475
1824	765	Un	26557241	26558005	unknown	Un	62380476	62381240
1825	764	Un	26559006	26559769	unknown	Un	62382241	62383004
1826	762	Un	26560770	26561531	unknown	Un	62384005	62384766
1827	758	Un	26562532	26563289	unknown	Un	62385767	62386524
1828	757	Un	26564290	26565046	unknown	Un	62387525	62388281
1829	756	Un	26566047	26566802	unknown	Un	62389282	62390037
1830	755	Un	26567803	26568557	unknown	Un	62391038	62391792
1831	754	Un	26569558	26570311	unknown	Un	62392793	62393546
1832	753	Un	26571312	26572064	unknown	Un	62394547	62395299
1833	748	Un	26573065	26573812	unknown	Un	62396300	62397047
1834	746	Un	26574813	26575558	unknown	Un	62398048	62398793
1835	741	Un	26576559	26577299	unknown	Un	62399794	62400534
1836	739	Un	26578300	26579038	unknown	Un	62401535	62402273
1837	739	Un	26580039	26580777	unknown	Un	62403274	62404012
1838	738	Un	26581778	26582515	unknown	Un	62405013	62405750
1839	737	Un	26583516	26584252	unknown	Un	62406751	62407487
1840	735	Un	26585253	26585987	unknown	Un	62408488	62409222
1841	735	Un	26586988	26587722	unknown	Un	62410223	62410957
1842	729	Un	26588723	26589451	unknown	Un	62411958	62412686
1843	725	Un	26590452	26591176	unknown	Un	62413687	62414411
1844	724	Un	26592177	26592900	unknown	Un	62415412	62416135
1845	723	Un	26593901	26594623	unknown	Un	62417136	62417858
1846	721	Un	26595624	26596344	unknown	Un	62418859	62419579
1847	720	Un	26597345	26598064	unknown	Un	62420580	62421299
1848	717	Un	26599065	26599781	unknown	Un	62422300	62423016
1849	716	Un	26600782	26601497	unknown	Un	62424017	62424732
1850	712	Un	26602498	26603209	unknown	Un	62425733	62426444
1851	712	Un	26604210	26604921	unknown	Un	62427445	62428156
1852	712	Un	26605922	26606633	unknown	Un	62429157	62429868
1853	711	Un	26607634	26608344	unknown	Un	62430869	62431579
1854	710	Un	26609345	26610054	unknown	Un	62432580	62433289
1855	699	Un	26611055	26611753	unknown	Un	62434290	62434988
1856	695	Un	26612754	26613448	unknown	Un	62435989	62436683
1857	695	Un	26614449	26615143	unknown	Un	62437684	62438378
1858	694	Un	26616144	26616837	unknown	Un	62439379	62440072
1859	691	Un	26617838	26618528	unknown	Un	62441073	62441763
1860	690	Un	26619529	26620218	unknown	Un	62442764	62443453
1861	685	Un	26621219	26621903	unknown	Un	62444454	62445138
1862	680	Un	26622904	26623583	unknown	Un	62446139	62446818
1863	677	Un	26624584	26625260	unknown	Un	62447819	62448495
1864	672	Un	26626261	26626932	unknown	Un	62449496	62450167
1865	670	Un	26627933	26628602	unknown	Un	62451168	62451837
1866	658	Un	26629603	26630260	unknown	Un	62452838	62453495
1867	652	Un	26631261	26631912	unknown	Un	62454496	62455147
1868	649	Un	26632913	26633561	unknown	Un	62456148	62456796
1869	646	Un	26634562	26635207	unknown	Un	62457797	62458442
1870	642	Un	26636208	26636849	unknown	Un	62459443	62460084
1871	623	Un	26637850	26638472	unknown	Un	62461085	62461707
1872	617	Un	26639473	26640089	unknown	Un	62462708	62463324
1873	611	Un	26641090	26641700	unknown	Un	62464325	62464935
1874	607	Un	26642701	26643307	unknown	Un	62465936	62466542
1875	606	Un	26644308	26644913	unknown	Un	62467543	62468148
1876	603	Un	26645914	26646516	unknown	Un	62469149	62469751
1877	602	Un	26647517	26648118	unknown	Un	62470752	62471353
1878	598	Un	26649119	26649716	unknown	Un	62472354	62472951
1879	597	Un	26650717	26651313	unknown	Un	62473952	62474548
1880	596	Un	26652314	26652909	unknown	Un	62475549	62476144
1881	593	Un	26653910	26654502	unknown	Un	62477145	62477737
1882	590	Un	26655503	26656092	unknown	Un	62478738	62479327
1883	578	Un	26657093	26657670	unknown	Un	62480328	62480905
1884	577	Un	26658671	26659247	unknown	Un	62481906	62482482
1885	577	Un	26660248	26660824	unknown	Un	62483483	62484059
1886	572	Un	26661825	26662396	unknown	Un	62485060	62485631
1887	565	Un	26663397	26663961	unknown	Un	62486632	62487196
1888	564	Un	26664962	26665525	unknown	Un	62488197	62488760
1889	563	Un	26666526	26667088	unknown	Un	62489761	62490323
1890	557	Un	26668089	26668645	unknown	Un	62491324	62491880
1891	523	Un	26669646	26670168	unknown	Un	62492881	62493403
1892	514	Un	26671169	26671682	unknown	Un	62494404	62494917
1893	501	Un	26672683	26673183	unknown	Un	62495918	62496418
1894	490	Un	26674184	26674673	unknown	Un	62497419	62497908
1895	455	Un	26675674	26676128	unknown	Un	62498909	62499363
1896	439	Un	26677129	26677567	unknown	Un	62500364	62500802
1897	438	Un	26678568	26679005	unknown	Un	62501803	62502240
1898	436	Un	26680006	26680441	unknown	Un	62503241	62503676
1899	435	Un	26681442	26681876	unknown	Un	62504677	62505111
1900	427	Un	26682877	26683303	unknown	Un	62506112	62506538
1901	420	Un	26684304	26684723	unknown	Un	62507539	62507958
1902	414	Un	26685724	26686137	unknown	Un	62508959	62509372
1903	414	Un	26687138	26687551	unknown	Un	62510373	62510786
1904	398	Un	26688552	26688949	unknown	Un	62511787	62512184
1905	373	Un	26689950	26690322	unknown	Un	62513185	62513557
1906	362	Un	26691323	26691684	unknown	Un	62514558	62514919
1907	342	Un	26692685	26693026	unknown	Un	62515920	62516261
1908	326	Un	26694027	26694352	unknown	Un	62517262	62517587
1909	316	Un	26695353	26695668	unknown	Un	62518588	62518903
1910	312	Un	26696669	26696980	unknown	Un	62519904	62520215
1911	294	Un	26697981	26698274	unknown	Un	62521216	62521509
1912	294	Un	26699275	26699568	unknown	Un	62522510	62522803
1913	288	Un	26700569	26700856	unknown	Un	62523804	62524091
1914	285	Un	26701857	26702141	unknown	Un	62525092	62525376
1915	273	Un	26703142	26703414	unknown	Un	62526377	62526649
1916	266	Un	26704415	26704680	unknown	Un	62527650	62527915
1917	260	Un	26705681	26705940	unknown	Un	62528916	62529175
1918	259	Un	26706941	26707199	unknown	Un	62530176	62530434
1919	258	Un	26708200	26708457	unknown	Un	62531435	62531692
1920	251	Un	26709458	26709708	unknown	Un	62532693	62532943
1921	249	Un	26710709	26710957	unknown	Un	62533944	62534192
1922	244	Un	26711958	26712201	unknown	Un	62535193	62535436
1923	226	Un	26713202	26713427	unknown	Un	62536437	62536662
1924	218	Un	26714428	26714645	unknown	Un	62537663	62537880
1925	193	Un	26715646	26715838	unknown	Un	62538881	62539073
1926	176	Un	26716839	26717014	unknown	Un	62540074	62540249
1927	175	Un	26718015	26718189	unknown	Un	62541250	62541424
1928	149	Un	26719190	26719338	unknown	Un	62542425	62542573
1929	138	Un	26720339	26720476	unknown	Un	62543574	62543711
1930	134	Un	26721477	26721610	unknown	Un	62544712	62544845
1931	132	Un	26722611	26722742	unknown	Un	62545846	62545977
1932	107	Un	26723743	26723849	unknown	Un	62546978	62547084
1933	67	Un	26724850	26724916	unknown	Un	62548085	62548151
1934	60	Un	26725917	26725976	unknown	Un	62549152	62549211
NA	15742	M	1	15742	unknown	M	1	15742
